# Supplementary material
Source: publisher figshare collection journal article supplement (https://gsapubs.figshare.com/ndownloader/files/24459359)
Supplement: Supplementary file 1 [file 24459359]

## Sheet: River 1
	Age (Ma)					1s error					Age used (Ma)	1s error		Trace elements (ppm)
	Pb207/Pb206	Pb206/U238	Pb207/U235	Pb208/Th232		Pb207/Pb206	Pb206/U238	Pb207/U235	Pb208/Th232					Si	P	Ti	Zr	La	Ce	Pr	Nd	Sm	Eu	Gd	Tb	Dy	Ho	Er	Tm	Yb	Lu	Hf	Th	U	Eu/Eu*
19-12-11-1	1946.7	1649.2	1784.2	1720.6		18.22	13.8	7.71	19.92		1946.7	18.22		153225	292.7	6.66	438754	<0.103	15.53	0.256	3.27	5.58	0.638	23.74	7.11	80.54	27.52	126.58	25.5	228.29	44.71	10639.1	306.52	307.27	0.169466
19-12-11-2	0.1	18	15.3	19.2		742.92	1.28	9.49	3.02		18	1.28		153225	297.51	3.73	419730	<0.136	25.95	<0.199	1.58	2.8	0.886	12.5	4.09	49.28	18.79	94.75	21.4	212.87	47.39	9809.34	257.8	269.59	0.457846
19-12-11-3	0.1	55.4	53.5	54.4		308.29	1.73	7.88	2.68		55.4	1.73		153225	597.88	16.95	438947	<0.134	25.62	0.5	7	11.5	1.66	66.81	22.5	283.66	106.48	492.61	96.63	836.18	162.59	9348.5	453.09	312.83	0.183087
19-12-11-4	0.1	65.5	62.2	73		346.47	2.29	11.35	6.97		65.5	2.29		153225	307.15	8.34	475686	<0.140	14.82	<0.148	0.95	2.12	0.734	12.95	4.37	62.63	27.82	154	37.21	383.69	89.91	10458.4	117.68	209.89	0.428265
19-12-11-5	70	61.1	61.3	55.1		372.59	2.35	10.21	8.37		61.1	2.35		153225	270.05	5.21	487787	<0.144	11.73	<0.142	<0.75	1.39	0.598	10.12	3.52	51.78	22.32	129.56	32.12	353	85.51	11786.8	143.12	324.76	0.487442
19-12-11-6	992.6	980.7	984.1	999.2		43.76	11.68	12.74	21.18		980.7	11.68		153225	309.61	5.06	446876	<0.099	13.02	<0.131	1.76	2.89	0.827	12.61	3.78	42.71	14.8	69.03	14.25	126.59	25.9	9607.01	164.28	220.72	0.418811
19-12-11-7	945.1	914.1	923	945.8		40.79	10.43	11.24	23.09		914.1	10.43		153225	294.32	8.19	448667	<0.159	9.11	<0.126	<1.06	2.34	0.15	13.88	5.12	65.63	24.44	118.51	24.48	221.11	42.57	11021.8	112.58	233.78	0.0804652
19-12-11-8	717.3	17.4	23.7	19.2		249.28	0.77	2.8	1.6		17.4	0.77		153225	171.78	5.15	382980	0.69	45.92	<0.19	1.91	4.01	1.04	13.76	4.34	48.95	18.13	94.9	21.95	228.47	51.87	10403.4	886.21	1049.71	0.428027
19-12-11-9	589.9	42.5	53.7	53.9		229.81	1.53	5.67	9.68		42.5	1.53		153225	251.08	1.74	454379	<0.170	5.67	<0.156	<0.93	0.81	0.227	4.85	2.13	34	14.54	83.52	20.26	207.73	45.33	14039.5	84.58	460.83	0.350132
19-12-11-10	1271.9	1260.2	1264.3	1271.8		30.45	12.9	10.47	22.27		1271.9	30.45		153225	151.39	14.47	462976	0.096	51.05	<0.137	1.62	2.14	0.749	8.66	2.48	27.31	9.12	42.54	9.32	93.32	19.32	8812.04	230.96	317.9	0.531907
19-12-11-11	584.7	581.3	581.9	621.1		132.85	14.32	26.76	25.1		581.3	14.32		153225	238.56	28.68	462011	<0.202	22.3	0.394	6.2	8.32	2.03	30.6	7.74	77.15	22.47	88.15	15.73	126.77	22.17	9085.42	106.87	101.07	0.388949
19-12-11-12	0.1	17.1	16.5	19.2		436.38	0.81	3.88	1.22		17.1	0.81		153225	348.27	2.23	409945	<0.21	96.85	<0.21	2.87	5.98	1.62	29.92	9.35	109.16	40.43	195.25	42.95	404.57	88.4	9700.62	1053.75	756.66	0.370257
19-12-11-13	545.6	528.5	531.6	529.6		58.64	6.91	10.47	14.15		528.5	6.91		153225	156.19	7.3	496907	<0.124	14.66	<0.123	1.25	2.73	0.12	15.48	4.9	55.35	19.76	83.93	16.05	133.74	24.68	11369.1	142.98	264.42	0.0564331
19-12-11-14	1128.1	1014.2	1050.7	1011.4		21.69	8.28	6.36	13.91		1128.1	21.69		153225	352.4	4.51	488377	<0.114	20.44	<0.151	1.3	4.53	0.183	33.21	13.33	178.34	71.73	364.07	78.35	708.96	137.16	14535.6	584.39	1137.9	0.0456128
19-12-11-15	562.5	18.5	23.4	17.6		273.23	0.72	3.04	1.33		18.5	0.72		153225	187.41	2.58	479114	<0.119	43.89	<0.125	1.26	2.11	0.761	13.01	4.07	49.25	19.13	95.98	22.74	234.21	54.68	11485	928.1	896.73	0.444042
19-12-11-16	53	63	62.7	74.6		1093.09	5.62	39.54	14.78		63	5.62		153225	299.63	16.91	457626	<0.193	10.52	<0.111	<1.04	1.96	0.44	11.99	3.87	49.82	18.48	89.46	18.55	172.04	34.93	9014.94	57.74	72.09	0.277482
19-12-11-17	144.1	63.3	65.4	74.3		209.3	1.8	5.78	4.95		63.3	1.8		153225	368.51	4.54	483870	<0.111	32.92	<0.110	<0.66	1.94	0.649	16.19	6.25	89.39	38.97	216.14	50.98	542.67	122.36	11293.3	322.19	569.98	0.35403
19-12-11-18	635.7	516.1	538.6	513		58.65	6.68	10.78	7.84		516.1	6.68		153225	309.39	15.81	458236	<0.189	76.26	0.25	4.1	8.5	1.6	40.54	11.65	115.95	35.87	145.72	25.87	208.8	35.97	9154.76	493.54	253.82	0.263505
19-12-11-19	79.8	17.4	17.9	18.5		525.66	0.77	4.57	1.49		17.4	0.77		153225	187.91	2.48	425190	<0.210	32.51	<0.139	0.9	1.53	0.585	8.8	2.91	34.13	13.5	70.93	16.41	176.43	40.12	9906.97	552.34	497.49	0.487403
19-12-11-20	1113.4	1086.7	1095.5	1104.8		58.71	16.39	18.83	31.26		1113.4	58.71		153225	239.8	5.16	449722	<0.132	8.08	<0.146	0.86	1.94	0.143	10.61	3.56	42.84	16.49	77.75	15.49	137.27	27.02	10213.5	65.13	83.54	0.09636
19-12-11-21	1674.1	1695.3	1685.6	1663.3		30.2	18.99	12.66	43.21		1674.1	30.2		153225	246.29	6.23	447397	<0.116	4.66	<0.121	<0.72	1.71	0.134	11.05	3.94	51.22	19.41	95.32	19.56	174.72	35.14	10327.1	80.23	192.22	0.0942421
19-12-11-22	130.6	195	190.1	193.6		88.56	2.78	6.35	5.8		195	2.78		153225	264.57	3.42	442585	<0.151	12.48	<0.139	<0.86	1.67	0.525	11.59	4.19	58.53	24.01	125.74	28.74	286.81	62.27	10099	302.19	468.6	0.36482
19-12-11-23	1565.5	1569	1567.3	1562.5		61.64	28.88	25.42	30.94		1565.5	61.64		153225	511.4	22.04	443884	<0.178	62.82	0.275	4.44	7.11	1.42	34.06	10.24	118.76	41.65	189.05	36.21	316.99	61.6	8787.3	108.07	43.9	0.278966
19-12-11-24	479.1	492.5	490.2	497.9		20.75	3.67	3.17	4.22		492.5	3.67		153225	756.67	6.87	435162	<0.149	107.29	0.243	4.13	10.03	2.13	70.67	26.7	352.99	138.02	665.94	137.23	1222.8	231.75	10427.7	2875.43	2455.37	0.244586
19-12-11-25	563.5	16.6	21.1	16.9		303.35	0.6	3.12	1.24		16.6	0.6		153225	202.52	3.53	452477	<0.158	65.86	<0.132	1.35	3.16	1.34	19.19	6.25	79.3	32.72	173.38	41.04	435.01	99.15	10242.4	969.33	861.4	0.52607
19-12-11-26	130.4	184.6	180.7	179.2		94.11	2.72	6.47	5.48		184.6	2.72		153225	273.08	2.58	458998	<0.138	15.28	<0.091	<0.69	2.12	0.679	15.5	5.73	79.33	33.26	175.8	40.77	397.99	87.26	10608.1	311.03	483.88	0.362122
19-12-11-27	0.1	61.5	58.1	62.5		309.19	2.17	9.89	5.81		61.5	2.17		153225	383.17	6.09	437154	<0.132	14.89	0.176	2.43	3.81	1.27	19.36	6.52	87.7	34.78	182.9	41.08	417.42	93.75	9130.66	151.71	227.1	0.452072
19-12-11-28	312.2	17.6	20	17.9		218.17	0.47	1.97	0.96		17.6	0.47		153225	159.19	3.16	441390	<0.186	50.85	<0.152	<1.09	2.11	0.872	14.95	5.16	70.14	30.82	174.69	44.36	483.9	117.49	11376.9	1215.51	1310.75	0.474651
19-12-11-29	129.3	63.5	65.2	62.7		150.2	1.23	4.06	3.26		63.5	1.23		153225	374.01	3.46	441306	<0.180	30.21	<0.146	<0.91	2.25	0.662	15.47	6.31	89.94	38.22	212.47	49.7	529.96	119.55	11389.1	369.77	681.02	0.343037
19-12-11-30	213.1	65.7	69.8	71.4		113.13	1.11	3.25	2.98		65.7	1.11		153225	476.76	3.41	407225	0.28	26.39	<0.171	2.02	4.24	1.13	23.35	8.67	113.63	45.98	241.65	55.79	551.47	125.08	10411.6	327.22	501.2	0.347193
19-12-11-31	2448.2	2437.5	2443.2	2510.5		16.73	20.6	8.65	53.88		2448.2	16.73		153225	635.26	7.09	437052	<0.152	8.87	<0.196	2.82	6.5	0.449	34.87	10.81	132.04	47.28	221.34	42.9	374.05	72.38	9702.27	156.64	281.5	0.0911765
19-12-11-32	262.1	63.9	69.4	76.5		1103.76	5.17	46.3	17.08		63.9	5.17		153225	311.25	12.81	447309	<0.168	10.32	<0.134	1	2.01	0.547	12.62	4.22	54.44	20.93	102.2	22.42	209.94	43.3	8540.69	58.69	73.55	0.332031
19-12-11-33	281	226.2	231.1	199.3		207.06	6.66	19.2	14.68		226.2	6.66		153225	183.56	3.56	475346	0.158	9.23	<0.132	<0.65	0.63	0.229	3.74	1.47	22.26	9.17	53.79	13.38	150.52	35.36	10549.3	99.09	148.46	0.456088
19-12-11-34	561.1	21	26.6	22.5		363.87	0.87	4.81	1.63		21	0.87		153225	258.9	6.2	415401	<0.228	109.36	0.66	11.03	14.86	4.97	50.21	12.9	134.93	45.67	207.92	42.7	403.95	87.52	8794.76	1734.32	764.72	0.556252
19-12-11-35	207.4	17.2	18.6	18.2		215.91	0.41	1.79	0.86		17.2	0.41		153225	436.7	3.34	436798	<0.160	80.96	<0.173	1.92	5.18	1.48	38.07	13.77	180.51	71.29	363.71	79.14	761.58	155.84	10557.8	1640.09	1961.56	0.322199
19-12-11-36	16.5	19.3	19.3	21		384.55	0.68	3.39	1.45		19.3	0.68		153225	158.58	2.89	443681	<0.218	40.07	<0.157	1.03	1.86	0.648	10.43	3.44	47.13	19.4	107.69	26.03	286.46	69.13	11340.9	771.43	881.71	0.449776
19-12-11-37	0.1	64.8	62.9	67.9		275.44	1.79	7.66	5.75		64.8	1.79		153225	328.18	6.89	443010	<0.210	14.13	<0.206	<1.00	1.73	0.691	10.83	3.8	51.88	21.93	117.61	27.58	291.34	68.49	10058.5	190.75	364.62	0.488045
19-12-11-38	787	738.8	750.8	810.3		63.07	10.74	15.16	23.68		738.8	10.74		153225	357.32	940.9	437319	<0.153	11.07	<0.123	1.72	3.35	0.449	15.69	4.83	59.07	21.29	96.02	19.24	166.68	32.94	9251.89	94.76	156.25	0.189335
19-12-11-39	120.9	63.6	65.1	69.6		475.19	2.85	14.52	12.14		63.6	2.85		153225	266.27	3.73	452804	<0.220	8.9	<0.173	<1.03	1.4	0.531	8.2	2.84	39.56	15.88	86.18	20.04	218.53	51.76	11130	79.7	189.64	0.479119
19-12-11-40	0.1	16.6	13.1	18		239.13	0.78	5.12	1.99		16.6	0.78		153225	238.26	1.96	424453	<0.230	36.96	<0.190	1.92	3.96	1.34	17.85	5.43	67.54	26.26	140.94	32.93	334.98	78.78	9793.59	503.72	513.43	0.487256
19-12-11-41	475.4	411.6	421.5	432.5		33.25	3.6	4.72	13.51		411.6	3.6		153225	262.37	2.45	448432	<0.175	2.4	<0.162	<1.08	<0.40	<0.091	5.92	3.27	49.74	22.02	117.57	25.43	236.35	47.64	15153.6	131.6	1037.92	n.a.
19-12-11-42	108.8	44.4	45.5	44.2		533.12	2.16	11.71	2.87		44.4	2.16		153225	310.66	9.92	463133	<0.150	68.34	0.174	2.75	4.9	1.85	24.4	7.47	87.83	31.43	147.98	30.48	280.95	58.37	8555.56	473.52	243.44	0.517247
19-12-11-43	0.1	18.2	15.2	21.5		13.34	0.59	2.85	1.08		18.2	0.59		153225	193.26	3.3	458606	<0.172	57.84	0.137	1.7	3.19	1.4	19.32	6.13	74.35	28.72	146.73	33.35	350.59	79.16	10818.5	1135.98	953.89	0.545191
19-12-11-44	764.6	754.4	756.9	829.2		42.37	8.1	10.06	23.87		754.4	8.1		153225	261.78	3.43	458928	<0.170	8.34	<0.157	1.33	2.61	0.198	16.72	5.82	73.77	28.24	135.65	27.39	241.51	47.99	11052.5	92.12	296.13	0.0916318
19-12-11-45	343.6	66.9	75	71.7		311.72	2.22	10.74	7.97		66.9	2.22		153225	359.56	4.63	466297	<0.230	18.73	<0.186	0.96	1.65	0.536	12.34	5.06	73.32	31.91	179.3	42.72	453.5	106.44	10825.2	165.58	330.76	0.363149
19-12-11-46	1548.5	18.8	38.5	26.1		161.62	0.63	3.2	1.63		18.8	0.63		153225	185.62	5.17	447784	0.246	48.72	<0.144	1.25	3.04	1.01	17.23	5.53	73.69	28.18	146.13	33.73	344.37	77.46	10953.2	792.13	1014.98	0.42664
19-12-11-47	575.9	17.1	21.8	16.5		419.06	0.83	4.64	1.87		17.1	0.83		153225	227.02	2.99	459836	0.353	48.2	0.173	1.65	3.2	1.09	16.06	5.22	65.52	26.8	140.53	33.03	348.39	81.18	10299.4	598.93	612.49	0.464834
19-12-11-48	129.5	62.4	64.2	58.8		443.92	2.51	13.27	6.93		62.4	2.51		153225	339.83	5.02	454169	<0.226	13.91	<0.158	2.19	4.03	1.24	19.69	6.52	83.39	32.32	165.32	37.57	375.85	84.99	10234.3	155.31	210.54	0.425565
19-12-11-49	297.4	68.2	74.9	73.9		134.3	1.41	4.21	3.32		68.2	1.41		153225	302.48	3.74	474879	<0.177	43.71	<0.151	<0.96	2.81	0.912	20.25	7.21	102.98	42.94	230.76	54.8	576.57	132.11	12061.7	505.31	816.07	0.369614
19-12-11-50	424.5	113.2	128.6	386.9		142.48	2.58	7.63	59.92		113.2	2.58		153225	249.58	4.3	482959	<0.171	0.55	<0.157	<0.76	0.39	0.104	4.86	2.35	36.29	13.91	67.81	14.06	124.44	22.77	13040.5	17.39	438.6	0.230942
19-12-11-51	590.7	618.2	612.3	666.9		68.4	9.01	13.84	18.21		618.2	9.01		153225	258.68	11.53	449760	<0.149	35.56	0.404	6.01	9.28	3.5	36.24	8.8	87.37	26.64	116.3	22.97	207.95	39.85	8298	300.18	297	0.583471
19-12-11-52	1015.8	1002.7	1006.7	929.3		47.19	12.8	14.01	45.25		1015.8	47.19		153225	485.95	2.24	457090	<0.151	4.73	<0.107	<0.83	2.18	0.245	16.3	6.01	80.12	31.85	159.28	33.78	318.23	66.1	10852.2	56.47	225.1	0.12565
19-12-11-53	299.1	58.7	64.8	50.4		512.55	2.85	16.36	8.07		58.7	2.85		153225	412.14	5.98	446550	<0.193	15.43	<0.151	<1.18	2.95	1.03	17.34	6.25	84.66	34.88	182.48	41.38	421.43	94.43	9427.33	137.71	175.13	0.440272
19-12-11-54	493.9	17.9	21.9	17.7		502.94	1.13	5.66	2.79		17.9	1.13		153225	209.52	2.79	446737	<0.164	29.19	<0.155	1.28	3	1.05	18.01	6.01	74.09	28.12	139.84	30.39	318.8	70.97	10363.3	511.43	545.66	0.436708
19-12-11-55	0.1	71	67.7	81		164.14	1.7	5.92	11.66		71	1.7		153225	276.59	3.17	448667	<0.233	9.17	<0.195	<0.93	1.1	0.361	6.96	2.33	33.84	14.95	81.95	19.34	195.87	43.31	11047.2	86.77	491.43	0.398865
19-12-11-56	0.1	46.2	45.3	48.1		344.04	1.45	6.93	3.12		46.2	1.45		153225	215.76	3.61	486080	<0.137	38.86	<0.148	1.62	3.02	1.05	18.54	5.75	75.37	30.76	159.83	37.74	386.13	84.23	10248	297.8	369.38	0.428993
19-12-11-57	272.1	74.8	81.1	71.6		160.43	1.5	5.55	2.99		74.8	1.5		153225	872.32	9.07	437992	<0.170	58.44	<0.140	2.22	5.76	2.4	45.5	16.76	231.31	94.15	473.36	102.9	990.68	207.09	9467.56	531.73	612.99	0.453225
19-12-11-58	229.1	21.2	23.2	18.4		405.13	0.84	4.48	2.07		21.2	0.84		153225	199.91	1.99	439284	<0.150	24.99	<0.166	<0.88	1.45	0.533	8.76	2.93	41.15	17.45	99.81	25.33	289.34	74.23	11179.7	517.69	675.17	0.457205
19-12-11-59	544.8	538	539.2	557.7		132.85	11.7	25.39	23.88		538	11.7		153225	332.18	5.92	448433	<0.185	6.87	<0.188	<1.05	2.07	0.506	12.27	4.42	54.4	20.31	99.77	20.73	185.17	38.52	8901.63	68.74	84.73	0.306946
19-12-11-60	338.9	68.8	77	73.3		296.09	2.18	10.4	5.3		68.8	2.18		153225	362.09	5.53	448317	<0.224	14.37	<0.198	2.43	4.54	1.89	23.35	6.98	83.87	31.65	155.76	35.07	348.96	79.48	9221	201.42	245.69	0.56119
19-12-11-61	1831.3	1812.3	1821	1935.7		20.44	15.47	8.84	44.78		1831.3	20.44		153225	1100.57	9.21	437699	<0.189	3.38	<0.174	1.27	3.17	0.28	23.9	10.43	148.61	61.71	316.1	67.51	619.7	122.73	11256.8	63.83	254.54	0.0983442
19-12-11-62	1995.6	1681.4	1826.1	1680.6		13.25	11.47	5.44	20.62		1995.6	13.25		153225	337.92	6.22	442358	<0.209	13.43	0.193	2.1	2.76	0.232	15.9	5.89	76.24	29.46	145.96	31.46	289.16	58.06	12368.1	285.61	890.69	0.107067
19-12-11-63	254.9	198.3	202.7	194.1		211.13	6.32	17.24	13.41		198.3	6.32		153225	249.5	2.51	464750	<0.145	12.82	<0.173	<0.91	1.3	0.589	7.52	3.09	43.33	19.25	108.44	26.48	297.91	68.66	10464.5	202.22	251.95	0.575909
19-12-11-64	0.1	45	44	44.8		639.67	2.39	14.03	6.91		45	2.39		153225	294.53	9	424958	<0.25	11.65	<0.189	<1.21	1.53	0.152	9.84	3.12	41.26	16.74	84.7	18.26	184.29	38.46	9945.59	128.58	195.2	0.119762
19-12-11-65	50.7	123	119.5	124.9		160.25	2.47	7.65	4.78		123	2.47		153225	281.62	4.33	448638	<0.156	13.06	<0.168	1.23	2	0.547	12.3	4.35	59.84	24.52	131.38	29.66	295.92	65	10738.5	340.6	372.73	0.337162
19-12-11-66	67.5	16	16.3	17		1725.05	2.34	21.14	6.76		16	2.34		153225	202.59	6.61	462906	<0.184	15.25	<0.152	<1.05	1.77	0.58	6.58	2.04	22.85	8.37	42.86	9.98	105.32	24.51	9489.13	137.33	139.29	0.519575
19-12-11-67	0.1	50.3	45.1	49.5		0	0.72	2.25	2.59		50.3	0.72		153225	245.06	3.36	409695	<0.169	29.25	<0.258	<1.26	2.26	0.291	13	4.54	61.61	25.67	145.22	35.97	386.44	89.81	12029.3	495.16	1492.37	0.164129
19-12-11-68	0.1	46.7	44.7	43.4		233.86	1.3	5.7	1.88		46.7	1.3		153225	395.43	9.4	444837	<0.167	86.76	0.271	4.73	8.85	3.01	42.66	12.68	147.73	51.87	244.32	50.7	466.79	93.36	8222.35	875.16	527.76	0.473591
19-12-11-69	204.5	19.2	20.8	17.4		544.7	0.93	5.67	2.47		19.2	0.93		153225	198.97	2.24	445394	<0.202	27.64	<0.199	1.96	3.36	1.15	16.13	5.12	60.93	24.14	125.99	29.21	312.06	75.07	10630.5	455.06	542.39	0.477563
19-12-11-70	0.1	62.5	59.8	63.4		570.45	3.28	17.63	9.38		62.5	3.28		153225	287	5.79	447970	<0.195	11.39	<0.190	2.68	4.13	1.52	19.51	6.41	75.7	29.23	148.85	32.66	330.8	74.72	8838.98	130.17	185.75	0.517678
19-12-11-71	0.1	72.4	67.4	71.1		688.99	4.18	26.93	9.67		72.4	4.18		153225	363.21	5.12	442704	<0.162	22.61	<0.158	2.03	4.54	1.58	23.14	7.67	91.08	35.78	177.6	38.65	369.75	79.82	8761.79	126.88	128.47	0.471267
19-12-11-72	605.7	16.8	21.7	16.3		517	1.07	5.91	3.48		16.8	1.07		153225	120	2.27	439946	<0.115	26.38	<0.203	<1.00	1.4	0.626	8.49	3.31	44.46	19.51	111.96	27.65	307.01	75.4	10419.7	469.06	787.93	0.555106
19-12-11-73	1567.5	1579.1	1573.9	1656.5		42.02	21.75	17.15	44.25		1567.5	42.02		153225	148.77	4	448604	<0.209	24.68	<0.146	<0.84	0.57	0.166	4.05	1.57	21.61	9.71	55.71	13.63	148.08	37.69	12334.9	75.29	111.62	0.334012
19-12-11-74	21.3	116.1	111.8	108.8		127.94	1.9	5.64	7.76		116.1	1.9		153225	292.36	3.97	421599	<0.218	7.63	<0.205	1.23	2.76	0.364	16.57	6.14	82.61	32.06	163.85	33.47	314.67	65.3	8268.42	119.53	421.98	0.164553
19-12-11-75	240	20.6	22.5	21.2		485.17	0.91	5.39	2.06		20.6	0.91		153225	162.31	3.23	448099	<0.216	30	<0.214	<1.02	1.68	0.686	10.37	3.15	39.7	16.06	86.48	20.9	214.39	50.57	10901.7	552.68	572.5	0.502458
19-12-11-76	0.1	46.9	40.3	43.5		512.97	2.69	16.84	8.18		46.9	2.69		153225	289.78	8.38	439052	<0.222	12.27	<0.138	<1.03	1.87	0.342	10.09	3.71	46.8	18.05	94.01	20.56	203.82	42.77	9930.28	114.03	158.54	0.240702
19-12-11-77	207.9	40.3	43.2	40.5		297.47	1.1	5.86	1.7		40.3	1.1		153225	384.39	8.69	439389	<0.173	83.93	0.527	7.99	15.36	5.48	71.4	20.53	227.01	77.42	340.3	67.1	594.55	116.61	8534.85	1086.64	669.27	0.505889
19-12-11-78	435.8	71.9	83.7	79.5		452.31	3.3	18.52	12.27		71.9	3.3		153225	304.69	5.73	445565	<0.213	14.04	<0.188	<1.12	1.76	0.582	10.03	3.57	49.96	20.94	115.83	27.86	288.75	66.98	9635.51	119.11	203.77	0.423483
19-12-11-79	0.1	64.4	62.1	65.7		129.5	1.13	3.86	1.49		64.4	1.13		153225	650.52	7.65	435402	<0.209	121.32	0.227	3.67	10.07	3.96	62.27	21.17	264	103.46	512.87	108.68	1038.5	216.11	7897.71	1793.03	1021.86	0.48346
19-12-11-80	126.2	121.2	121.4	117.3		89.91	1.66	4.27	5.42		121.2	1.66		153225	219.38	2.66	438756	<0.245	11.12	<0.162	<1.07	0.77	0.304	8.29	3.66	53.43	22.68	126.25	30.39	316.4	70.3	11089.7	389.36	1292.97	0.36785
19-12-11-81	56.8	76.4	75.8	77		242.46	1.83	7.81	4.15		76.4	1.83		153225	347.33	3.77	405849	<0.271	28.07	<0.199	<1.13	1.99	0.603	13.06	4.8	65.92	27.77	151.91	35.28	358.41	81.62	9193.54	261.65	443.29	0.361609
19-12-11-82	48	69.5	68.8	88.2		1067.4	4.83	41.96	25.56		69.5	4.83		153225	228.27	4.4	453398	<0.226	6.96	<0.193	<1.19	1.05	0.443	5.35	1.99	25.16	10.35	56.03	13.23	141.71	34.33	8632.33	46.63	104.57	0.571415
19-12-11-83	16.2	66	64.7	64.2		868.6	4.04	29.75	19.94		66	4.04		153225	260.7	4.52	453204	<0.203	8.15	<0.194	<0.98	0.88	0.519	7.03	2.52	33.65	13.97	75	17.51	188.89	45.11	9288.82	61.95	133.78	0.637922
19-12-11-84	113.4	68.7	69.9	62.2		519.75	3.32	17.25	13.51		68.7	3.32		153225	255.6	4.47	456095	<0.187	9.52	<0.148	<0.88	1.38	0.38	6.97	2.41	34.02	14.78	81.79	19.5	212.39	51.88	9463.57	88.67	206.97	0.374582
19-12-11-85	1033	923.2	956	960.5		28.39	8.27	7.97	11.81		923.2	8.27		153225	971.28	15.12	427998	0.5	23.38	1.3	13.41	14.95	3.19	69.52	22.92	267.52	95.27	432.39	80.02	677.73	128.55	7433.87	910.19	753.04	0.302506
19-12-11-86	0.1	61.8	58.9	66.5		222.36	1.8	6.96	4.36		61.8	1.8		153225	321.23	3.75	451908	<0.191	26.11	<0.197	<1.29	2.43	0.682	14.76	5.35	76.91	32	172.47	41.15	434.37	101.21	10405.3	296.59	505.39	0.348143
19-12-11-87	995.6	16.7	25.9	16.6		152.25	0.49	1.87	0.41		16.7	0.49		153225	219.33	4.91	411985	<0.27	152.96	0.29	5.81	9.87	2.14	37.89	11.13	119.41	40.48	184.43	37.9	356.97	73.75	9379.21	4803.52	1465.88	0.338308
19-12-11-88	1800.3	1791.5	1795.2	1841.5		22.55	16.15	9.77	35.59		1800.3	22.55		153225	245.16	7.53	444189	<0.203	15.38	<0.187	1.15	1.91	0.152	9.01	3.08	35.82	12.88	60.95	12.91	126.9	25.06	9336.8	119.34	321.37	0.112017
19-12-11-89	64.1	73.6	73.3	66.6		389.24	2.38	12.86	6.77		73.6	2.38		153225	251.41	7.26	443397	<0.194	23.16	<0.172	<1.52	1.78	0.444	11.14	3.56	43.83	16.89	85.85	19.08	185.05	39.09	8889.99	192.27	266.4	0.304824
19-12-11-90	2240.5	1937.2	2087.8	1973.7		17.49	15.85	8.26	37.2		2240.5	17.49		153225	492.67	6.3	440150	<0.207	6.87	<0.189	1.39	2.75	0.185	14.27	5.05	64.91	24.44	117.33	25	229.71	45.78	9628.56	104.33	305.02	0.0902844
19-12-11-91	1077.6	1074	1074.9	1069.5		55.16	14.7	17.49	32.19		1077.6	55.16		153225	649.31	18.05	440494	<0.202	2.68	<0.223	2.78	6.72	0.361	36.85	11.16	126	41.72	179.8	32.94	280.82	52.05	9061.14	76.42	163.67	0.0701331
19-12-11-92	265.6	217.1	221.1	242.7		209.34	5.1	18.94	11.05		217.1	5.1		153225	162.43	3.11	440777	<0.230	16.65	<0.231	<1.45	0.89	0.266	5.29	2.12	29.86	12.09	66.7	16.2	163.01	36.54	9253.18	148.85	183.6	0.374782
19-12-11-93	203.2	67	70.9	63.5		585.78	3.07	20.61	9.21		67	3.07		153225	277.49	5.39	437375	<0.236	10.24	<0.159	2.1	3.96	1.18	19.4	5.98	71.83	27.06	133.58	29.42	293.52	65.29	8300.68	124.66	167.19	0.411579
19-12-11-94	184	70	73.3	61		515.77	3.23	18.17	10.53		70	3.23		153225	296.32	6.32	441547	<0.211	12.54	<0.213	<1.11	1.41	0.437	8.65	2.89	37.34	16.07	89.03	20.6	216.9	50.37	8572.2	120.04	186.87	0.382546
19-12-11-95	1338.6	20.7	37.9	25.5		469.29	1.4	10.3	3.01		20.7	1.4		153225	129.43	5.81	439755	0.249	29.08	<0.182	<1.35	1.36	0.55	6.7	2.27	29.77	11.82	66.19	15.97	177.08	42.32	9419.72	501.77	464.86	0.557026
19-12-11-96	175.5	63.6	66.5	64.5		130.72	1.09	3.62	1.69		63.6	1.09		153225	1176.33	8.1	433370	0.146	83.27	0.234	4.68	10.52	4.53	70.77	25.26	351.67	149.83	803.17	178.49	1774.53	383.04	7477.87	1414.47	1060.07	0.507557
19-12-11-97	1862.5	1857	1859.1	1915.9		39.62	26.85	18.12	76.86		1862.5	39.62		153225	176.04	5.21	410764	0.29	9.27	<0.188	<1.12	2.03	<0.137	8.73	2.81	34.9	12.87	61.39	12.38	109.77	21.91	8307.86	51.99	147.19	n.a.
19-12-11-98	261.8	19.1	21.2	19.6		208.04	0.56	1.94	0.5		19.1	0.56		153225	521.08	15.03	426935	0.244	689.73	1.52	25.99	42.53	10.26	157.01	41.84	443.42	144.9	623.44	121.46	1079.03	200.32	7542.34	11338.6	2823.92	0.383845
19-12-11-99	346.8	80.6	90	92.6		112.68	1.39	4.26	3.93		80.6	1.39		153225	483.26	6.21	444900	<0.223	14.34	<0.214	1.05	2.86	0.187	21.05	8.3	121.27	49.67	254	56.05	538.72	111.95	10702.7	451.66	907.37	0.0736804
19-12-11-100	619.1	599.5	603.3	618.9		59.24	7.66	11.89	23.21		599.5	7.66		153225	468	10.11	451038	<0.261	1.5	<0.174	1.31	3.56	<0.131	22.91	7.51	78.29	21.54	77.75	11.71	78.3	11.59	11892.1	121.27	366.49	n.a.
19-12-11-101	543.1	505.2	511.8	534.6		77.74	7.25	13.87	14.36		505.2	7.25		153225	832.94	10.85	439907	<0.29	29.84	<0.191	2.85	6.19	1.54	39.4	14.21	183.76	70.03	344.14	70.39	623.65	124.33	8466.57	195.57	259.6	0.301472
19-12-11-102	97.6	18.6	19.2	22.6		1108.16	1.9	12.68	6.69		18.6	1.9		153225	333.46	4.01	439286	<0.287	29.26	<0.186	1.41	3.33	1.19	18.27	6.15	78.95	31.47	161.92	36.62	367.94	81.18	8180.09	200.29	326.79	0.466418
19-12-11-103	478.4	224.6	248.2	220.9		54.31	2.46	5.11	3.16		224.6	2.46		153225	406.1	5.62	425203	6.85	65.34	1.56	5.84	3.22	0.9	16.65	5.54	72.8	29.21	151.42	34.79	355.15	79.88	8999.73	1784.48	1116.46	0.375774
19-12-11-104	2765	1243.2	1923.2	1315.8		18.27	11.39	8.36	24.95		2765	18.27		153225	722.5	12.72	423973	<0.225	13.76	<0.211	2.22	2.89	0.412	20.45	7.35	103.31	41.16	206.19	43.09	383.44	75.77	8958.85	137.57	288.97	0.16384
19-12-11-105	249	19.7	21.7	18		479.65	0.84	5.13	2.26		19.7	0.84		153225	151.04	2.23	443495	<0.240	32.87	<0.193	<1.02	1.5	0.657	9.96	3.32	42.04	16.54	88.97	21.15	227.94	54.57	9608.11	671.18	795.59	0.519648
19-12-11-106	491	529.5	522.1	516		90.64	8.11	16.37	16.3		529.5	8.11		153225	229.98	7.95	438399	<0.221	14.38	<0.205	1.23	2.55	0.175	12.77	4.23	51.06	17.95	84.16	16.74	144.32	26.97	8887.03	148.25	205.24	0.0937545
19-12-11-107	872.8	884.5	880.7	903.1		52.56	11.28	14.23	35.23		884.5	11.28		153225	218.53	33.28	437682	<0.205	5.32	<0.162	1.8	3.68	0.577	19.72	6.55	80.4	30.63	138.87	26.95	239.91	46.96	7432.44	57.79	190.53	0.20707
19-12-11-108	1139.5	16.8	27.9	15.7		568.83	1.45	9.25	3.2		16.8	1.45		153225	149.29	2.8	444037	<0.216	35.57	<0.143	<1.09	1.7	0.68	9.63	3.11	38.93	16.35	90.93	21.38	232.67	55.11	9172.95	509.71	490.45	0.513796
19-12-11-109	0.1	49.4	45.7	47.8		557.37	2.27	15.57	5.17		49.4	2.27		153225	419.34	4.03	442220	<0.142	50.13	<0.212	1.42	3.7	0.77	23.21	8.27	106.92	43.05	226.65	48.44	472.33	98.64	9689.41	237.03	229.6	0.254022
19-12-11-110	1565.9	1305.2	1406.9	1835.3		24.83	11.96	9.27	59.86		1565.9	24.83		153225	362.49	6.56	400126	0.52	5.16	0.43	1.67	2.3	0.64	6.12	2.56	32.55	11.56	63.57	15.19	167.39	37.65	10335.3	80.86	694.49	0.521507
19-12-11-111	2602.2	2584.5	2593.6	2613		14.66	19.45	7.85	42.17		2602.2	14.66		153225	332.24	5.42	435557	<0.231	15.41	<0.192	<1.19	2.48	<0.125	13.81	5.38	68.83	26.7	134.31	27.46	250.71	48.88	10046	201.96	505.05	n.a.
19-12-11-112	231.1	64.7	69.2	76.7		577.48	3.47	19.82	12.54		64.7	3.47		153225	388.6	7.69	441529	<0.197	10.22	<0.192	1.41	2.88	0.98	17.35	5.6	75.78	31.98	174.74	39.1	398.67	91.49	8240.36	118.63	207.66	0.423838
19-12-11-113	481.8	435.4	442.7	423.7		89.95	6.66	14.19	28.63		435.4	6.66		153225	1041.3	8.16	438406	<0.205	2.38	<0.195	<1.35	2.69	0.134	20.02	8.99	136.28	56.56	290.05	61.2	556.43	107.77	10905.6	54.03	251.5	0.0558234
19-12-11-114	0.1	67.2	64.4	74.4		460.66	2.63	14.74	9.65		67.2	2.63		153225	344.63	5.14	441504	<0.241	12.88	<0.151	<1.28	1.61	0.66	11.08	3.87	51.75	21.05	114.64	27.11	285.61	67.72	9262.03	128.27	253.32	0.477728
19-12-11-115	220.5	67.4	71.7	69.2		117.74	1.11	3.5	1.14		67.4	1.11		153225	1568.39	8.96	432203	<0.219	198.82	0.44	9.28	20.12	6.04	114.83	38.5	479.12	182.69	884.56	182.71	1708.72	357.38	7451.51	3816.74	1188.89	0.384162
19-12-11-116	94	77.2	77.7	93.4		331.09	2.64	11.29	8.04		77.2	2.64		153225	347.27	2.21	439932	<0.249	28.07	<0.226	<1.13	2.42	0.7	16.89	6.81	94.18	40.26	215.29	48.36	487.71	108.24	10782.6	325.48	564.1	0.33473
19-12-11-117	0.1	62.7	54.2	55.9		312.26	2.59	15.29	6.28		62.7	2.59		153225	870.57	9.73	442942	<0.289	31.39	0.312	5.07	8.97	3.17	47.58	15.8	203.52	78.8	394.05	85.2	817.62	172.08	10125.6	259.14	280.45	0.469105
19-12-11-118	407.6	121.4	136.4	121.3		169.28	3.18	9.67	4.38		121.4	3.18		153225	406.68	12.19	474949	<0.195	26.16	0.198	3.72	5.82	1.38	27.95	9.95	122.15	46.72	239.59	51.34	482.59	100.01	9077.96	298.54	233.29	0.330785
19-12-11-119	184.4	59.6	62.6	63.5		276.11	2.01	7.62	4.31		59.6	2.01		153225	425.34	9.91	449070	<0.210	33.59	0.222	3.27	6.73	0.73	32.39	10.72	128.3	46.01	216.63	44.17	407.64	80.06	9590.02	682.07	780.46	0.151157
19-12-11-120	0.1	20.2	19.4	22.2		474.39	0.89	5.03	2.37		20.2	0.89		153225	111.75	<1.47	447512	<0.237	19.51	<0.179	<1.07	0.76	0.358	5.68	1.86	23.71	10.08	57.68	14.86	166.39	43.58	12132.9	493.42	679.81	0.526771
19-12-11-121	1241.8	1115.5	1158.5	1108.6		45.04	14.96	14.98	37.48		1241.8	45.04		153225	724.84	9.65	446927	<0.222	5.89	0.14	1.57	3.39	0.276	25.1	9.58	127.77	49.61	239.73	49.33	435.16	85.69	11314.3	120.1	256.26	0.0914728
19-12-11-122	1167	1165	1165	1185.2		109.46	25	38.47	44.08		1167	109.46		153225	367.99	14.61	451484	<0.217	8.02	<0.242	1.65	3.83	0.574	21.7	6.81	83.79	30.07	139.98	28.32	252.68	49.19	9754.97	40.9	37.7	0.192487
19-12-11-123	1636	1023.6	1238.2	1223.7		47.34	15.01	17.06	44.66		1636	47.34		153225	238.78	6.53	447546	<0.232	9.37	<0.221	<1.41	1.15	0.146	6.63	2.38	32.87	12.95	65.84	14.37	138.17	28.49	10311.5	58.83	147.68	0.161647
19-12-11-124	193	192.3	192.2	193		315.93	6.64	25.68	15.06		192.3	6.64		153225	180.12	3.32	453985	<0.212	14.94	<0.202	<1.13	0.91	0.339	6.14	2.36	30.6	13.31	73.5	17.02	180.45	41.95	9853.07	139.88	181.46	0.438444
19-12-11-125	66.4	65.5	65.4	64.4		195.15	1.42	5.34	3.59		65.5	1.42		153225	361.97	7.64	440625	<0.241	40.83	<0.218	1.31	2.86	0.91	19.31	7.18	97.78	41.6	230.46	54.33	573.78	130.28	10188.5	431.1	688.6	0.374358
19-12-11-126	657.7	559.2	578.5	567.4		96.51	9.18	19.6	17.85		559.2	9.18		153225	381.01	19.19	444304	<0.148	15.78	<0.232	4.16	7.75	0.79	28.69	6.41	57.67	14.17	49.71	7.63	58.46	9.79	10278.9	127.9	142.56	0.161968
19-12-11-127	340.2	125	136.3	131.8		228.48	3.3	13.45	6.19		125	3.3		153225	317.52	3.75	443974	<0.181	10.09	<0.227	2.18	5.39	0.499	29.25	9.16	112.75	41.28	190.94	37.78	332.73	63.85	9907.31	292.43	277.81	0.121496
19-12-11-128	0.1	18.2	5.1	16.1		0	0.86	5.86	1.83		18.2	0.86		153225	189.57	3.68	435924	<0.204	62.54	<0.214	1.64	3.47	1.34	20.43	6.91	88.45	35.82	190	43.22	451.58	103.04	9386.57	919.81	835.34	0.486548
19-12-11-129	5.1	20.4	20.2	19.1		567	0.85	5.57	2.29		20.4	0.85		153225	131.46	2.85	478367	<0.172	36.03	<0.173	<0.94	1.79	0.76	11.49	4.04	53.09	22.61	127.05	31.56	353.82	86.42	11395	575.25	758.27	0.512326
19-12-11-130	1778.7	1630.6	1695.4	1652.7		19.05	12.74	7.92	22.33		1778.7	19.05		153225	525	7.23	439818	<0.194	11.89	0.308	4.97	9.22	1.04	47.91	14.21	167.15	58.66	267.31	52.19	457.12	87.59	9999.92	269.12	441.21	0.151277
19-12-11-131	0.1	20.8	20.3	26.6		763.37	1.21	8.53	3.44		20.8	1.21		153225	316.21	2.27	412774	<0.25	21.19	<0.195	<1.28	1.54	0.62	9.19	3	40.12	15.98	87.68	21.1	230.12	55.68	10062.7	282.52	410.23	0.50384
19-12-11-132	1090.8	1060.2	1069.3	1042.4		75.27	20.5	23.92	47.77		1090.8	75.27		153225	392.82	10.17	445829	<0.232	7.68	0.378	5.27	10.57	1.68	58.76	17.96	206.26	71.92	315.66	59.06	505.6	95.19	8340.58	193.48	283.75	0.206087
19-12-11-133	267.4	22.1	24.5	26		605.3	1.08	7.67	2.63		22.1	1.08		153225	245.84	3.17	445101	<0.215	36.89	<0.191	2.74	5.18	1.61	23.07	6.61	80.06	29.86	151.85	33.28	335.26	73.88	10389.1	567.11	559.89	0.450253
19-12-11-134	1330	1219.3	1258.9	1264.9		69.81	21.92	25.28	39.62		1330	69.81		153225	275.05	7.35	443142	<0.274	5.78	<0.204	<1.30	2.84	0.75	20.66	6.68	80.73	29.61	135.3	25.77	218.27	41.74	9013.78	71.34	71.61	0.299334
19-12-11-135	0.1	16.5	14.8	27.3		1576.96	2.07	19.71	5.5		16.5	2.07		153225	261.91	7.5	471221	<0.158	26.38	<0.172	1.73	3.18	1.38	20.44	7.14	88.41	34.45	175.2	38.63	380.17	81.93	8660.64	242.82	292.94	0.523293
19-12-11-136	221.9	96	100.9	108.7		317.77	2.83	14.36	5.26		96	2.83		153225	562.1	6.99	416581	<0.28	29.76	0.27	4.72	8.11	1.49	38.27	11.95	141.07	51.34	238.46	48.68	439.76	89.64	8804.17	367.87	294.56	0.258563
19-12-11-137	146.7	48.9	50.8	47.5		241.56	1.22	5.38	3.06		48.9	1.22		153225	348.16	7.47	441533	<0.230	33.84	<0.197	2.26	4.14	0.436	22.14	7.34	90.54	33.13	161.04	34.26	320.85	63.21	9936.52	531.2	765.42	0.139225
19-12-11-138	216.4	15.9	17.3	16.7		951.69	1.19	9.57	2.59		15.9	1.19		153225	215.61	3.31	449601	<0.234	50.61	<0.214	<1.47	2.87	0.93	13.69	4.68	56	21.61	112.76	25.93	261.03	58.26	9919.04	646.54	534.18	0.453586
19-12-11-139	0.1	17.5	16.6	18		713.25	1.02	7.05	3.12		17.5	1.02		153225	134.37	2.76	438770	<0.252	28.19	<0.213	<1.34	1.92	0.83	11.54	3.66	49.59	21.05	121.04	29.26	334.56	81.83	10250.6	401.34	577.93	0.539069
19-12-11-140	314.7	243.4	249.9	244.4		139.01	5.06	13.54	9.09		243.4	5.06		153225	230.49	8.44	441668	<0.228	12.79	0.396	4.99	6.73	1.35	26.49	7.38	81.63	29.15	148.02	32.39	323.85	70.19	7866.43	384.67	387.37	0.309104
19-12-11-141	242.6	62.2	66.9	66.7		337.14	2.05	10.33	4.86		62.2	2.05		153225	490.67	5.36	434163	<0.197	30.28	<0.199	1.59	3.61	1.46	25.64	9.08	123.81	51.57	267.17	59.93	588.36	128.36	9419.3	293.74	347.7	0.463938
19-12-11-142	1208	1148.8	1168.4	1125.3		37.21	12.72	12.35	23.05		1208	37.21		153225	238.53	9.71	438139	<0.205	20.26	<0.174	<1.36	2.88	0.199	12.91	4.41	51.38	18.32	84.81	17.1	152.28	29.51	10742.3	269.63	367.94	0.099773
19-12-11-143	143	17.8	18.7	20.6		677.7	0.92	6.58	2.46		17.8	0.92		153225	153.33	2.97	434608	<0.255	36.2	<0.200	<1.17	2.1	0.86	12.33	4.06	52.95	21.07	113.02	26.67	290.44	67.59	9813.41	535.43	605.1	0.516686
19-12-11-144	558.8	17.1	21.6	17.9		540.17	0.85	6.23	2.35		17.1	0.85		153225	207.39	2.62	416738	<0.143	33.26	<0.190	1.43	1.95	0.92	11.35	3.73	45.35	17.94	95.06	21.57	230.06	54.09	9561.13	553.49	581.77	0.59785
19-12-11-145	1104.6	1050.5	1067.1	1030.1		67.19	17.54	21.38	40.11		1104.6	67.19		153225	365.35	3.77	434353	<0.215	7.22	0.313	4.64	9.05	3.96	44.72	12.12	134.11	45.41	206.22	41.47	391.59	84.07	7877.49	66.98	121.89	0.601782
19-12-11-146	111.2	66.4	67.5	64.9		719.77	4.45	24.72	14.48		66.4	4.45		153225	239.01	4.94	439422	<0.263	9.25	<0.175	<1.44	1.57	0.67	8.35	2.52	33.82	13.65	72.13	16.67	180.95	42.77	9325.1	94.71	153.59	0.56572
19-12-11-147	156.5	63.9	66.2	63.6		237.61	1.52	6.85	3.32		63.9	1.52		153225	382.92	2.54	479186	<0.222	20.51	<0.179	<1.03	2.73	0.89	16.52	6.31	86.39	36.86	200.93	47	491.72	109.48	11980.2	225.7	406.76	0.405157
19-12-11-148	1671.9	1578.5	1617.4	1768.6		23	13.81	9.41	41.76		1671.9	23		153225	553.57	2.49	433354	<0.250	3.42	<0.192	<1.37	3.67	0.456	23.56	8.55	112.1	43.09	210.69	44.07	405.51	80.73	11575.4	200.95	806.73	0.149921
19-12-11-149	500.7	254.9	280.2	251.2		83.26	3.53	8.98	7.81		254.9	3.53		153225	320.19	16.65	424939	<0.271	41.51	0.258	3.97	6.79	0.533	36.89	11.85	140.49	51.05	236.34	45.81	402.81	76.05	8756.1	313.6	493.98	0.102957
19-12-11-150	0.1	18.8	17.5	18.1		979.2	1.47	11.37	4.29		18.8	1.47		153225	114.91	<2.20	419942	<0.27	21.09	<0.30	<1.63	1.44	0.56	6.11	2.24	26.39	10.72	58.33	13.87	150.41	36.05	10541.5	338.19	411.4	0.577173
19-12-11-151	1097.1	984.2	1018.6	986.3		35.85	10.29	10.76	26.12		984.2	10.29		153225	935.96	8.21	438449	<0.257	2.57	<0.189	<1.19	4.26	0.136	31.88	11.67	158.62	62.79	304.24	61.17	555.42	107.25	11696.2	213.02	646.06	0.0356775
19-12-11-152	283.6	182.7	189.8	200		268.66	5.12	21.65	13.61		182.7	5.12		153225	375.62	3.75	440733	<0.289	15.38	<0.263	<1.38	1.76	0.54	11.95	4.66	66.45	28.31	161.11	37.89	409.44	92.67	10526.3	117.36	168.48	0.359975
19-12-11-153	62.7	16.7	17	17.7		510.31	0.64	4.19	1.48		16.7	0.64		153225	152.99	2.54	438448	<0.286	48.63	<0.231	<1.27	2.45	1.15	15.3	5.04	64.28	25.33	138.74	32.66	353.4	85.55	10537.9	978.37	1010.77	0.574234
19-12-11-154	336.3	16.4	18.7	17.7		784.01	1.2	8.18	2.39		16.4	1.2		153225	302.96	3.45	438307	<0.217	49.05	0.22	3.41	6.5	2.58	29.17	9.24	112.64	43.06	212.47	46.42	461.88	99.5	9371.83	594.89	476.01	0.572815
19-12-11-155	262.9	211.6	215.5	237.1		161.55	4.48	13.88	9.21		211.6	4.48		153225	329	<2.08	400646	0.34	17.88	<0.229	<1.59	1.14	0.438	8.22	2.65	36.94	16.07	89.29	21.31	222.88	53.47	9311.17	315.3	343.16	0.437427
19-12-11-156	338.1	15.7	18	14.6		722.81	1.33	7.04	2.74		15.7	1.33		153225	193.3	2.69	497146	<0.225	38.25	<0.189	1.39	1.99	0.68	9.79	3.37	41.27	18.19	94.9	22.34	240.16	55.19	11616.1	619.49	575.15	0.470989
19-12-11-157	1758.9	1413.4	1555.9	1205.6		25.24	13.08	10.29	21.65		1758.9	25.24		153225	260.22	7.79	405949	<0.290	17.4	<0.233	<1.32	2.02	0.333	11.59	3.9	50.08	19.19	96.13	20.5	189.84	38.49	10045.1	191.84	251.55	0.2104
19-12-11-158	145.1	64	66	54.8		334.34	2.47	9.85	8.28		64	2.47		153225	259.95	2.6	488622	<0.207	26.25	<0.172	<0.96	1.75	0.53	11.09	4.61	64.47	27.75	156.95	38.02	427.56	101.65	12246.4	263.84	546.42	0.367799
19-12-11-159	246.9	59.2	63.9	62.2		282.1	1.68	8.12	2.35		59.2	1.68		153225	771.86	6.38	431832	<0.274	57.99	<0.230	3.27	6.84	2.71	43.04	14.31	182.1	71.47	356.29	78.24	773.03	168.57	9353.51	908.3	496.62	0.482864
19-12-11-160	198.4	60.1	63.5	65.7		223.56	1.39	6.21	2.43		60.1	1.39		153225	855.71	6.55	442389	<0.170	74.87	0.274	4.88	11.11	3.79	74.16	25.96	343.75	132.14	641.66	132.53	1250.95	246.93	10777.3	1042.52	805.74	0.403661
19-12-11-161	248.2	196.1	200.6	212.3		177.71	4.08	14.46	8.22		196.1	4.08		153225	166.65	4.49	442588	<0.195	16.16	<0.152	<1.28	1.52	0.616	9.24	3.4	45.2	19.25	104.46	25.8	274.88	64.4	9461.85	247.03	262.23	0.502507
19-12-11-162	234.7	180.5	184.8	187		212.75	4.21	16.26	8.34		180.5	4.21		153225	279.26	7.39	489820	<0.191	13.56	<0.138	1.33	2.57	0.799	16.45	5.22	67.22	26.97	141.49	30.66	296.43	62.55	9994.13	158.08	181.19	0.375679
19-12-11-163	225.7	174.6	178.5	169.8		267.9	6.9	19.76	14.07		174.6	6.9		153225	208.05	290.22	472971	<0.225	13.61	<0.185	1.53	1.43	0.421	8.11	3.3	41.17	17.92	96.86	24.15	255.41	57.91	9955.42	161.4	196.42	0.37794
19-12-11-164	860.4	102.2	141.5	110		69.76	1.65	4.11	3.63		102.2	1.65		153225	855.18	14.29	375951	1.74	57.28	3.64	21.24	20.49	4.73	63.56	24.38	312.87	110.73	553.37	122.89	1149.89	224.75	10967.2	1921.55	2942.26	0.400698
19-12-11-165	232	149.1	154.5	155.9		67.55	1.71	4.06	4.8		149.1	1.71		153225	256.4	2.32	443511	<0.218	6.07	<0.147	<1.05	2.15	0.253	16.25	5.91	80.84	34.43	177.69	40.46	404.7	86.16	11258.9	532.79	1257.65	0.130856
19-12-11-166	1675.2	1665.2	1671.5	1708.6		33.19	18.58	14.2	38.79		1675.2	33.19		153225	240.32	25.01	437263	<0.226	2.19	0.216	3.33	5.23	0.668	24.45	7.63	87.03	30.89	132.32	25.08	218.11	42.1	8022.34	65.85	104.33	0.180595
19-12-11-167	325.8	316.7	318.4	309.4		230.56	10.97	28.58	24.83		316.7	10.97		153225	231.52	4.83	431030	0.4	12.07	0.49	6.54	9.27	0.316	43.49	12.41	139.56	49.03	217.04	40.97	352.7	70.02	7676	120.42	179.34	0.0481141
19-12-11-168	261.6	180.2	186.5	184.8		132.99	3.26	9.9	6.65		180.2	3.26		153225	187.87	3.54	459017	<0.255	17.15	0.148	<1.06	1.46	0.6	8.47	2.98	43.85	18.29	101.04	24.83	263.83	62.85	10592	343.84	372.8	0.521618
19-12-11-169	0.1	69.1	65.2	66.6		347.14	2.38	12.45	5.54		69.1	2.38		153225	493.48	8.27	449413	<0.213	26.66	<0.198	2.24	4.56	1.72	28.24	9.65	127.79	52.08	272.56	61.16	616.95	139.88	8717.27	300.25	321.17	0.463376
19-12-11-170	0.1	68.5	65.3	138.8		1016.51	5.8	39.11	27.97		68.5	5.8		153225	214.87	6.78	477701	<0.231	5.42	<0.192	<1.03	0.94	0.383	5.95	2.64	37.24	15.05	85.32	20.28	215.41	49.94	9889.14	38.56	93.72	0.495103
19-12-11-171	182.2	73.6	77.1	105.8		654.21	3.64	25.47	9.59		73.6	3.64		153225	272.81	9.81	469129	<0.200	14.11	<0.206	2.97	5.63	1.2	26.99	8.22	99.1	36.03	171.75	34.45	322.81	65.42	9550.91	134.33	150.07	0.297608
19-12-11-172	1542.1	1529.1	1536.2	1494.7		30.03	15.37	12.08	39.91		1542.1	30.03		153225	299.29	3.8	448829	<0.247	12	<0.194	<1.39	1.33	0.218	10.29	3.58	51.74	20.81	103.76	21.92	207.7	41.57	10582.1	63.08	163.3	0.180153
19-12-11-173	0.1	18.4	17.6	19.4		439.33	0.69	4.48	2.23		18.4	0.69		153225	148.49	2.43	447504	<0.252	44.39	<0.204	<1.09	2.76	1	15.96	5.25	64.96	26.24	135.77	32.14	346.19	82.17	10659	642.91	897.78	0.460626
19-12-11-174	0.1	63.2	60.2	68.4		168.51	1.35	5.87	4.38		63.2	1.35		153225	453.86	4.6	404819	<0.28	35.33	<0.31	<1.72	2.9	0.81	20.4	8.48	111.6	45.87	235.49	53.52	536.68	112.99	9575.88	460.16	868.07	0.321951
19-12-11-175	292	17.1	19.2	16.9		240.94	0.48	2.11	1.05		17.1	0.48		153225	501.24	5.32	439054	<0.282	97.09	<0.159	1.83	6.78	1.9	43.69	16.14	209.7	79.16	391.66	82.17	767.91	151.58	10238.9	1735.09	1686.29	0.337495
19-12-11-176	347.9	19.4	22.3	19.1		571.02	0.98	6.62	2.79		19.4	0.98		153225	190.99	3.28	445659	<0.287	43.83	<0.247	<1.38	2.7	0.825	14.28	4.64	63.5	26.11	140.48	33.11	353.24	85.03	10742.8	556.79	661.41	0.406188
19-12-11-177	0.1	20.5	19.9	22.9		541.7	0.91	5.86	2.29		20.5	0.91		153225	136.65	2.29	445454	<0.238	30.21	<0.255	<1.21	1.64	0.643	9.82	3.23	43.47	17.21	96.12	23.18	255.14	62.6	11605.1	568.05	659.18	0.489838
19-12-11-178	74.3	157.4	152.7	199.6		665.98	9.05	48.44	22.06		157.4	9.05		153225	415.14	23.69	384498	<0.260	18.12	<0.245	2.9	4.77	1.29	26.97	8.91	107.94	39.56	189.2	37.34	330.42	66.14	7482.67	153.46	123.48	0.347704
19-12-11-179	134.5	105.1	106.6	44.4		68.9	1.18	2.88	3.59		105.1	1.18		153225	907.98	21.44	410568	2.47	26.94	0.81	3.86	3.41	0.781	18.97	7.84	105.69	43.89	252.16	66.42	781.05	179.61	14907.3	389.37	2284.56	0.296865
19-12-11-180	97.5	11.3	11.7	13.4		434.16	0.41	2.4	0.53		11.3	0.41		153225	247.25	8	448432	0.222	213.98	1.11	16.88	25.88	8.3	105.33	26.06	249.74	75.26	294.33	52.4	429.46	79.96	9793.88	3516.31	1503.72	0.486003
19-12-11-181	1696.3	1725.3	1713.8	1640		29.71	18.4	12.82	39.7		1696.3	29.71		153225	182.24	****	446158	<0.197	11.02	<0.214	1.23	1.86	0.276	9.85	2.99	37	13.46	63.51	12.89	118.47	23.87	10496.6	73.98	127.54	0.197131
19-12-11-182	0.1	15.8	11	24.7		412.93	1.04	7.75	2.56		15.8	1.04		153225	263.7	<1.94	449979	<0.282	32.37	<0.240	1.57	2.97	0.87	14.8	5.01	61.73	24.28	131.17	30.34	323.91	73.7	10138.4	453.35	517.66	0.401171
19-12-11-183	0.1	61.1	56.2	74.2		676.27	4.18	23.48	8.13		61.1	4.18		153225	278.85	18.33	452605	<0.268	16.8	0.413	4.99	7.65	1.49	32.05	9.37	106.51	36.05	167.33	33.79	299.16	58.44	8896.16	207.6	161.7	0.290912
19-12-11-184	1150.8	1082.3	1106.5	1137.8		58.38	17.25	18.91	28.97		1150.8	58.38		153225	735.9	12.93	445839	<0.195	4.36	0.277	4.51	8.48	0.313	37.56	12.29	146.06	53.87	242.96	47.24	407.46	75.77	10371.2	234.96	304.24	0.0536171
19-12-11-185	0.1	63.8	60.3	73.1		600.95	3.47	20.01	12.92		63.8	3.47		153225	268.97	6	448139	<0.245	10.76	<0.261	1.4	2.19	0.94	13.02	4.7	60.17	25.5	136.7	32.1	337.44	80.78	9006.79	119.51	199.46	0.53817
19-12-11-186	1200	1103.8	1137.9	1043.2		73.91	18.62	25.06	46.11		1200	73.91		153225	280.99	16.89	452465	<0.233	8.81	<0.255	<1.13	1.54	0.232	10.08	3.3	43.67	16.09	79.74	17.07	156.95	31.03	10336.6	44.86	68.94	0.180018
19-12-11-187	206.8	21.5	23.3	22.7		939.89	1.44	12.61	3.61		21.5	1.44		153225	248.97	5.09	430364	<0.243	40.35	<0.186	1.55	3.89	1.21	17.54	5.77	69.69	26.89	137.04	31.58	323.62	69.56	9051.78	432.51	397.1	0.447832
19-12-11-188	245.5	130.4	136.8	138.7		107.49	1.97	5.93	3.94		130.4	1.97		153225	692.99	14.62	438145	<0.265	26.61	<0.188	2.8	5.53	1.4	38.76	14.87	202.84	82.13	421.4	91.82	893.25	185.99	8134.54	696.18	792.36	0.292343
19-12-11-189	206.8	202.4	203.1	224.5		97.16	2.87	7.61	4.77		202.4	2.87		153225	2915.23	5.99	440370	24.7	80.99	6.15	25.29	9.05	2.16	32.16	10.53	129.06	49.3	253.07	56.6	568.59	122.07	8766.93	641.97	520.59	0.387071
19-12-11-190	466.2	17.3	21	20.1		586.58	0.96	6.55	2.29		17.3	0.96		153225	228.57	3.67	503233	<0.157	69.24	0.183	2.91	5.62	2.11	30.04	9.43	110.67	43.5	220.96	48.92	493.22	106.47	10650.8	717.02	648.14	0.496459
19-12-11-191	72.7	65.4	65.7	71		779.15	4.82	26.36	14.99		65.4	4.82		153225	309.7	12.74	449661	<0.199	12.56	<0.138	<1.37	2.92	0.705	13.76	4.59	55.18	21.58	108.04	23.13	222.94	46.73	9047.1	93.63	128.39	0.340023
19-12-11-192	3384.2	3359.4	3376.4	3559.1		29.95	59.88	21.48	159.93		3384.2	29.95		153225	198.84	3.62	469740	<0.193	10.64	<0.178	<1.27	0.97	0.305	5.74	2.04	25.99	10.83	56.69	12.97	130.93	28.93	10729.4	48.07	91.86	0.395164
19-12-11-193	205	32	34.5	22.7		205.57	0.66	3.13	1.52		32	0.66		153225	488.97	6.5	447500	0.61	61.99	<0.274	2.18	5.27	1.64	36.03	13.08	180.03	71.34	364.85	79.81	778.18	160.65	10550.7	1102.53	1487.85	0.363853
19-12-11-194	97.1	19.9	20.6	20.3		224.78	0.44	2.02	0.59		19.9	0.44		153225	198.55	5.38	453839	<0.177	143.71	0.3	5.05	9.37	2.68	42.73	12.39	134.46	47.58	222.04	46.89	453.87	95.06	11214.8	4518.86	2129.69	0.409466
19-12-11-195	579	83.3	102.8	88.6		218.31	3.05	9.95	5.85		83.3	3.05		153225	148.45	3.72	487138	<0.228	43.25	<0.235	1.9	3.06	1.1	14.55	4.53	55.04	21.6	115.05	25.92	285.41	64.87	10400.1	549.45	520.15	0.503988
19-12-11-196	217.4	82.5	87.3	93.4		331.89	2.72	13.04	5.24		82.5	2.72		153225	246.69	5.7	440131	<0.195	40.1	0.156	<1.53	3.32	1.23	17.39	5.6	68.6	25.99	127.07	26.06	250.93	52.04	8885.42	351.34	316.45	0.494887
19-12-11-197	559.4	513.2	522.3	542.3		59.79	6.16	10.78	12.22		513.2	6.16		153225	246.84	9.34	439620	<0.194	16.61	0.385	5.66	9.42	0.359	40.24	12.04	131.31	44.12	191.02	35.86	300.04	53.76	9505.42	278.8	354.38	0.0563715
19-12-11-198	732.5	186.8	233.6	212.3		60.48	2.51	5.58	4.63		186.8	2.51		153225	282.85	6.52	431396	<0.268	18.82	<0.243	1.53	2.68	0.735	16.53	5.89	75.78	30.64	155.04	33.9	330.36	71.09	9023.2	537.73	557.33	0.3376
19-12-11-199	305.5	170.2	179.9	193.3		301.38	5.02	23.53	11.61		170.2	5.02		153225	252.52	4.08	447258	<0.203	33.45	<0.192	<1.19	2.22	0.779	11.23	4.45	56.27	23.25	119.64	26.63	274.53	61.41	7642.86	146.78	163.48	0.476969
19-12-11-200	316.7	60.9	67.9	61.2		473.41	3.13	15.55	12.06		60.9	3.13		153225	208.6	3.62	446657	<0.253	13.39	<0.190	<1.37	0.98	0.493	7.31	2.51	33.23	14	76.72	18.41	199.19	46.45	9815.67	127.75	230.43	0.563112
19-12-11-201	98.8	22.4	23.1	28.9		636.3	0.96	7.46	3.5		22.4	0.96		153225	134.99	<2.12	400636	<0.36	10.43	<0.27	<1.12	0.7	0.265	2.37	0.79	12.48	5.78	37.73	10.71	135.27	38.97	10667.6	239.6	519.83	0.628988
19-12-11-202	863.2	18.1	26.4	22		448.01	1.15	6.32	3.45		18.1	1.15		153225	1662.68	2.8	437302	8.12	53.49	2.63	11.94	6.23	1.75	24.96	7.52	89.42	34.94	178.41	39.06	390.2	86.48	9226.19	545.1	588.56	0.429033
19-12-11-203	2812.1	2590.6	2718	2266.9		16.28	22.03	9.43	45.66		2812.1	16.28		153225	432.97	5	444007	<0.187	8.54	<0.199	2.03	4.85	2.44	30.11	8.54	82.29	26.84	128.47	28.17	287.93	62.53	9724.7	77.47	174.21	0.617281
19-12-11-204	289.1	14.8	16.7	17.4		523.09	0.98	4.34	2.43		14.8	0.98		153225	146.17	1.66	466114	0.221	26.54	<0.162	1.17	1.62	0.64	7.99	2.68	33.14	13.77	69.3	16.43	178.46	42.7	11255.9	654.07	865.69	0.543837
19-12-11-205	1688.1	1562.8	1617.9	1380		16.02	11	6.59	21.98		1688.1	16.02		153225	584.37	19.53	386582	<0.236	8.97	0.6	5.67	7.87	2.25	32.53	10.91	128.52	44.97	200.8	40.74	363.34	69.34	10492.2	215.66	662.24	0.429905
19-12-11-206	891	70.5	100.8	73.1		283.38	2.56	14.04	11.93		70.5	2.56		153225	340.11	4.62	440189	<0.28	11.85	<0.207	<1.50	1.49	0.517	9.44	3.31	48.18	21.01	115.58	27.54	296.79	70.72	9771.8	131.53	254.95	0.421435
19-12-11-207	978.7	930.4	945.5	953		50.51	12.25	14.49	23.44		930.4	12.25		153225	341.93	8.05	476471	<0.147	17.05	<0.134	2.21	5.16	0.568	28.64	8.99	111.9	42.6	194.52	39.08	345.94	67.5	10624	183.68	222.43	0.142842
19-12-11-208	1346.2	61.4	109.6	72.8		254.58	2.5	14.34	5.11		61.4	2.5		153225	547.96	46.77	447064	<0.254	25.15	<0.252	3.86	6.93	2.68	34.89	12.21	148.56	55.37	272.93	59.98	587.01	125.77	9464.34	293.05	256.5	0.526911
19-12-11-209	61.1	64	64	71.6		213.55	1.81	5.68	7.48		64	1.81		153225	589.73	3.07	493944	0.174	26.65	<0.191	1.98	2.6	0.593	19.76	8.61	120.99	51.91	288.33	66.96	694.93	149.11	12505.1	211.82	581.19	0.252926
19-12-11-210	403.3	18.3	21.6	19.1		591.4	1.16	6.7	1.55		18.3	1.16		153225	244.31	4.13	439842	<0.169	87.42	<0.211	1.93	6.04	1.89	33.72	10.4	126.07	44.84	216.22	45.84	428.3	88.82	9735.81	1803.9	868.71	0.404873
19-12-11-211	40	17.3	17.5	19.8		582.25	0.76	5.02	1.71		17.3	0.76		153225	192.38	3.49	470303	<0.207	58.39	<0.177	1.69	3.98	1.59	21.89	7.07	83.53	31.17	156.6	33.68	346.22	75.29	10659	819.37	786.03	0.520777
19-12-11-212	5	31.3	31	57.2		113.7	0.51	1.42	1.6		31.3	0.51		153225	1034.08	3.15	398786	<0.28	14.09	0.68	6.06	7.31	0.724	26.17	8.35	107.14	41.22	235.31	62.22	694.09	155.17	9374.15	3060.28	5119.42	0.160029
19-12-11-213	222.9	73.4	78.1	80.4		295.76	2.43	10.28	6.73		73.4	2.43		153225	553.25	3.01	445288	<0.253	33.68	<0.223	<1.17	3.02	0.91	21.62	8.38	113.92	48.39	250.87	57.48	583.92	128.81	10793.9	521.24	614.36	0.344294
19-12-11-214	502.7	520.9	518	522.1		51.86	5.51	9.11	11.56		520.9	5.51		153225	325.07	4.61	448079	<0.154	24.72	<0.235	<1.31	3.04	0.368	15.61	4.71	56.6	19.54	91.27	18.27	172.15	32.92	11496.4	283.75	442.17	0.163316
19-12-11-215	0.1	69.8	67.6	78.6		130.5	1.22	3.91	2.7		69.8	1.22		153225	1033.23	3.37	442686	<0.156	54.63	<0.171	1.91	5.09	1.08	38.54	15.86	230.23	95.61	492.28	106.58	1025.81	210.31	10616	836.25	1006.15	0.235737
19-12-11-216	454	416.5	422.7	463		72.74	5.57	10.98	15.21		416.5	5.57		153225	1029.72	6.45	453112	<0.252	5.68	<0.250	1.45	4.86	0.17	33.34	12.88	171.37	67.58	327.89	68.7	637.16	126.93	12452.6	139.36	529.59	0.0408289
19-12-11-217	0.1	68.1	65.4	73.1		709.91	3.75	24.42	15.57		68.1	3.75		153225	241.76	6.77	509661	<0.139	11.87	<0.145	1.62	2.02	0.81	10.6	4.03	52.42	21.25	118.37	27.98	311.42	72.38	10647.4	113.37	190.16	0.53515
19-12-11-218	238.4	80.6	86.1	100.7		485.87	4.38	19.82	16.47		80.6	4.38		153225	386.41	<1.91	398527	<0.33	15.16	<0.28	<1.46	1.58	0.443	9.49	4.09	56.1	24.74	136.65	33.3	347.19	79.2	9515.86	153.38	322.83	0.349753
19-12-11-219	81.6	54.6	55.3	59		743.9	3.18	21.17	6.62		54.6	3.18		153225	797.83	11	501390	<0.186	48.12	0.32	6.62	14.51	5.14	84.97	27.1	337.63	126.77	606.36	123.56	1120.87	221.05	9638.19	301.31	228.11	0.447524
19-12-11-220	627.3	60.4	77	73.1		320.35	2.8	11.75	4.27		60.4	2.8		153225	875.34	80	439394	<0.246	51.7	0.266	3.71	8.05	3.21	48.51	15.49	197.79	77.43	385.08	82.73	791.12	170.71	9200.25	580.14	338.76	0.496605
19-12-11-221	497.4	534.2	527.6	538.3		62.35	6.34	11.19	12.52		534.2	6.34		153225	107.11	5.89	447986	<0.251	24.65	<0.207	<1.15	1.68	0.627	5.84	1.51	15.04	5.27	23.48	5.35	54.03	12.33	11074.2	237.55	307.79	0.611964
19-12-11-222	425.9	16.1	19.1	16.6		310.61	0.55	2.84	1.18		16.1	0.55		153225	216.11	3.45	444005	<0.216	61.53	<0.207	1.77	3.94	1.61	22.29	6.4	74.41	26.91	130.02	28.68	284.29	62.1	10356.2	1578.71	1396.33	0.525221
19-12-11-223	405.6	18.5	21.8	18.4		318.88	0.83	3.26	1.21		18.5	0.83		153225	287.33	7.66	510827	<0.197	97.98	0.3	4.6	9.5	3.27	46.46	14.18	164.24	61.48	307.26	68.33	691.94	145.38	11356.7	2359.47	1530.89	0.475845
19-12-11-224	55.4	62.6	62.5	70.6		390.65	2.65	10.93	8		62.6	2.65		153225	673.85	3.99	493698	<0.184	27.49	<0.148	1.48	4.45	1.55	24.84	9.21	122.95	49.46	257.01	57.01	576.96	121.2	10410.7	237.33	426.54	0.450708
19-12-11-225	106.8	65.2	66.4	72.2		264.5	1.66	7.65	5.48		65.2	1.66		153225	329.32	3.69	445376	<0.166	29.41	<0.179	<1.20	2.09	0.637	14.77	5.77	78.96	33.93	184.83	43.89	472.37	108.36	10791.3	299.78	558.45	0.350506
19-12-11-226	534.3	576	568	585.8		94.67	8.79	18.56	17.62		576	8.79		153225	185.46	13.8	446198	<0.32	24.56	<0.199	1.64	2.66	0.343	12.3	3.45	39.42	12.94	56.82	10.91	101.47	19.23	9568.03	157.43	178.63	0.183324
19-12-11-227	145.6	19.3	20.4	22.7		471.31	0.79	4.64	2.14		19.3	0.79		153225	153.56	2.3	460271	<0.220	33.36	0.144	1.56	3.24	1.13	16.1	4.94	60.35	24.02	136.43	32.51	356.32	88.03	11288.9	651.95	873.33	0.478313
19-12-11-228	1331.1	1033.1	1133.8	1195.6		164.06	44.56	57.35	52.4		1331.1	164.06		153225	463.33	28.78	496967	0.24	28.67	0.84	12.99	17.89	3.73	73.54	20.19	219.23	71.22	294.87	54.8	458.73	85.02	9930.52	104.9	40.26	0.314385
19-12-11-229	0.1	18.7	17.1	25.9		849.04	1.25	9.96	5.16		18.7	1.25		153225	236.21	1.59	497973	<0.189	23.77	<0.167	<1.07	2.09	0.717	12.38	4.38	56.71	23.47	129.18	31.02	326.55	74.66	10997.5	296.63	500.8	0.430928
19-12-11-230	153.5	45.4	47.5	45		250.7	1.11	5.26	1.66		45.4	1.11		153225	272.45	5.78	440245	<0.226	140.69	0.53	8.07	12.62	3.71	50.8	14.23	155.74	53.34	247.33	51.06	474.03	98.37	8930.42	1114.68	710.69	0.447952
19-12-11-231	792.9	19.3	27.2	25.9		592.41	1.74	8.92	3.44		19.3	1.74		153225	217.96	14.06	389080	0.34	58.63	0.82	10.92	16.76	4.57	50.46	10.02	77.62	17.97	62.64	10.91	82	14.81	8347.91	1214.17	870.73	0.480424
19-12-11-232	141.5	15	15.8	16.8		1119.77	1.47	10.72	3.5		15	1.47		153225	193.65	3.24	451454	<0.221	41.22	<0.235	<1.71	3.71	1.23	16.97	5.07	57.63	21.28	110.78	25.73	269.2	59.96	10155.8	565.25	482.18	0.473911
19-12-11-233	203.3	60.5	64.2	63.2		94.01	0.99	2.42	1.69		60.5	0.99		153225	913.14	7.98	475742	0.138	164.05	0.255	5.36	13.37	4.08	90.41	33.07	427.3	165.69	804.14	169.13	1564.13	305.77	11456.8	2441.87	2141.76	0.358761
19-12-11-234	263.5	61.5	66.9	65.9		330.64	2	10.15	7.05		61.5	2		153225	374.98	5.45	447254	<0.217	13.41	<0.166	<1.10	2.14	0.82	13.63	4.9	67.87	28.9	156.94	36.9	381.46	88.35	10357.2	179.29	325.29	0.464172
19-12-11-235	413.9	71.2	82.2	70.8		293.78	2.88	10.96	4.34		71.2	2.88		153225	420.23	28.59	466196	<0.224	29.51	0.49	8.15	14.68	2.38	68.41	19.74	220.09	75.3	339.15	65.92	566.13	108.25	9766.95	629.96	388.67	0.229601
19-12-11-236	252.9	19.4	21.4	18.1		338.73	0.61	3.41	1.63		19.4	0.61		153225	142.61	3.99	454475	<0.195	42.32	<0.187	<1.04	2.9	1.18	17.14	5.55	68.16	26.84	139.94	32.16	341.26	81.04	12215.7	937.53	1123.59	0.511678
19-12-11-237	0.1	67	63.1	62.5		378.32	2.34	13.17	8.82		67	2.34		153225	329.92	5.17	453670	<0.177	11.41	<0.193	<0.94	1.87	0.742	12.54	4.4	62.61	25.92	145.12	34.38	369.11	87.65	11121.8	133	249.4	0.46844
19-12-11-238	361.8	17.8	20.6	16.4		279.22	0.52	2.7	1.05		17.8	0.52		153225	119.91	1.69	447836	<0.217	42.96	<0.150	<1.22	2.04	0.719	11.55	3.52	46.71	19.75	112.96	28.33	322.29	79.38	12409	1365.86	1264.83	0.452837
19-12-11-239	143.7	45.9	47.8	23.6		415.82	1.7	9.27	4.15		45.9	1.7		153225	121.34	1.91	451022	<0.227	18.85	<0.159	<1.10	1.13	0.363	6.66	1.81	24.12	10.28	57.48	14.17	158.05	37.7	11314.6	252.97	386.61	0.404529
19-12-11-240	79.9	64.6	65	66		132.33	1.03	3.52	2.32		64.6	1.03		153225	812.83	4.33	446433	<0.248	49.1	0.334	4.93	9.39	3.23	51.36	17.23	224.63	88.54	463.23	108.49	1121.12	259.76	9465.96	1005.85	1300.26	0.449652
19-12-11-241	24.2	129.4	124.2	134.3		489	4.97	27.46	12.73		129.4	4.97		153225	289.28	11.09	453108	<0.153	7.35	<0.190	1.89	3.55	0.596	17.45	5.15	61.37	21.4	100.1	20.13	176.16	35.81	8782.5	88.7	111.14	0.231502
19-12-11-242	352.2	197.8	210.3	221.9		275.16	6.59	24.52	12.91		197.8	6.59		153225	348.56	8.72	451241	<0.216	16.72	<0.141	2.43	4.01	1	22.95	7.62	93.75	35.89	176.95	37.11	339.25	68.93	9491.58	164.22	153.42	0.318681
19-12-11-243	143.9	127	127.9	130.1		76.12	1.56	3.8	3.12		127	1.56		153225	559.48	1.63	442567	0.46	12.07	0.19	1.7	3.69	<0.112	34.6	13.33	187.3	74.65	371.77	77.02	696.18	137.7	14026.6	965.83	1203.8	n.a.
19-12-11-244	34.4	48.5	48.2	49.1		242.67	1.58	4.92	2.63		48.5	1.58		153225	443.42	17.01	487132	<0.162	27.58	0.65	9.85	16.71	0.93	82.41	25.38	282.18	99.74	440.39	80.84	641.81	117.99	10576	1315.89	1083.35	0.0766168
19-12-11-245	0.1	70.6	62.3	55.2		499.52	3.46	22.27	8.13		70.6	3.46		153225	448.1	12.36	445085	<0.184	13.99	0.21	3.09	5.72	1.41	33.89	11.21	140.45	53.63	257.85	52.78	476.23	99.13	8893.65	154.59	138.51	0.309603
19-12-11-246	169.9	46.7	49.1	43.5		233.49	1.19	5.02	1.39		46.7	1.19		153225	297.11	4.91	423883	<0.30	22.8	<0.26	<1.61	3.49	0.572	21	7.01	96.94	36.88	193.09	40.93	400.69	80.59	10802.1	264.44	345.5	0.204265
19-12-11-247	196.3	60.8	64.3	66.4		143.44	1.46	3.76	3.89		60.8	1.46		153225	1159.89	4.22	483562	<0.20	33.9	<0.130	1.85	5.35	1.06	40.38	17.77	269.21	110.33	594.17	133.26	1327.64	276.15	13357.1	773.23	1519.46	0.220478
19-12-11-248	2037.3	2056.6	2047	1960.6		14.56	14.07	7.17	28.39		2037.3	14.56		153225	177.93	4.47	449132	<0.172	12.58	<0.158	<1.32	2.76	0.733	13.61	4.14	53.69	21.63	115.89	26.68	273.66	62.06	10373.4	216.22	571.8	0.365628
19-12-11-249	1149.1	1134.9	1139.7	1156.9		26.08	9.69	8.61	21.67		1149.1	26.08		153225	328.12	8.15	444322	<0.186	29.06	<0.187	<1.21	1.12	0.126	6.66	2.87	43.63	20.28	129.14	34.58	383.78	85.42	12598	179.18	407.19	0.141041
19-12-11-250	1627.6	20.5	43.8	27.3		106.32	0.57	2.26	1.15		20.5	0.57		153225	126.12	17.91	446789	0.276	66.64	<0.173	1.72	2.32	0.72	10.55	3.53	45.32	19.9	120.66	32.92	384.78	98.05	12733.9	2537.19	1959.43	0.44492
19-12-11-251	4945.9	1782.8	3659.2	******		30.23	38.07	18.74	1984.94		4945.9	30.23		153225	<6072.29	**********	230404	563.36	1518.86	147.68	484.44	114.26	42.24	168.2	49.47	473.82	108.75	433.17	68.6	630.53	59.99	24717.6	414.88	11570.1	0.931501
19-12-11-252	105.5	134.7	133.1	141.8		134.92	2.31	7.18	5.35		134.7	2.31		153225	190.87	2.22	429529	<0.270	9.57	<0.157	<0.99	1.18	0.331	7.58	2.62	37.16	15.33	85.48	20.54	220.71	51.64	11352.3	295.88	454.4	0.338354
19-12-11-253	0.1	54.6	48.3	54		464.21	2.73	16.67	7.36		54.6	2.73		153225	331.46	17.26	454758	<0.228	11.43	<0.243	1.71	3.13	0.538	17.83	5.69	68.08	25.27	122.82	25.11	228.25	47.16	9229.91	198.42	234.97	0.220168
19-12-11-254	1123	1085.1	1097.6	1140.5		73.63	17.61	24.31	43.26		1123	73.63		153225	361.44	46.12	449964	<0.216	7.17	<0.206	<1.32	1.94	0.414	12.7	4.2	51.95	19.41	89.28	18.53	163.05	32.75	9994.89	48.72	77.42	0.254986
19-12-11-255	0.1	22.5	20.9	20.3		418.68	0.93	5.64	2.59		22.5	0.93		153225	221.06	4.08	422566	<0.215	34.98	<0.198	<1.54	1.53	0.548	8.86	3.2	43.1	16.94	96.41	23.55	258.11	61.7	11188.4	562.1	700.84	0.455027
19-12-11-256	178	63.1	66.1	65.7		150.33	1.26	4.16	2.79		63.1	1.26		153225	353.11	3.98	443853	<0.224	42.47	<0.245	<1.28	2.81	0.78	19.34	7.45	106.49	44.5	243.73	57.14	599.09	134.05	11535.6	563.65	795.54	0.323469
19-12-11-257	409.5	19.7	23.2	25.3		243.57	0.56	2.62	2.45		19.7	0.56		153225	465.31	3.81	460362	<0.215	28.47	<0.182	1.25	3.13	1.28	22.82	9.02	126.65	53.7	288.25	66.08	682.2	146.58	11940.4	646.27	1564.78	0.46302
19-12-11-258	0.1	18	16.1	18.7		219.77	0.6	3.45	1.25		18	0.6		153225	217.94	2.95	438630	<0.257	57.92	<0.219	1.77	4.17	1.54	26.43	8.46	107.85	41.28	210.65	48.06	486.84	110.31	10860.9	1151.51	1131.43	0.44846
19-12-11-259	2455.4	19.1	64.2	30.4		239.86	1.22	8.76	3.48		19.1	1.22		153225	1709.79	12.21	439520	12.76	59.06	3.62	15.56	4.08	1.1	10.97	3.17	39.73	15.4	84.83	20.79	220.26	52.22	10463.7	352.57	371.87	0.502665
19-12-11-260	0.1	18.1	16.8	18.7		340.76	0.66	3.97	1.32		18.1	0.66		153225	206.58	3.29	444041	<0.171	50.6	0.142	1.46	2.46	0.95	14.61	4.78	62.85	26.59	149.12	36.12	397.74	93.68	11049.4	948.67	867.39	0.484452
19-12-11-261	481.2	16.9	20.6	17.8		118.88	0.29	1.09	0.4		16.9	0.29		153225	238.81	6.3	434227	<0.236	162.87	0.274	6.67	14.08	3.86	61.89	16.66	181.24	62.26	286.53	59.34	570.62	117.82	10850.6	8450.1	3890.51	0.399756
19-12-11-262	0.1	70.7	64.7	73.4		121.68	1.66	7.38	4.25		70.7	1.66		153225	339.2	3.39	445509	<0.263	29.09	<0.252	<1.13	2.24	0.78	16.4	6.19	83.33	34.18	184.73	43.33	452.82	101.23	11532.3	468.09	609.51	0.393431
19-12-11-263	139.4	61.5	63.4	85		909.6	6.13	31.48	14.08		61.5	6.13		153225	195.89	14.98	472686	<0.204	13.4	<0.190	1.47	2.8	0.634	14.69	4.06	51.37	18.48	90.65	18.95	177.69	36.68	10838.8	104.9	111.12	0.302217
19-12-11-264	30.1	66	65.1	69.7		77.33	0.79	1.99	1.82		66	0.79		153225	1576.15	3.67	431485	<0.177	48.35	<0.238	1.58	5.83	0.7	52.39	21.93	323.83	134.18	705.25	151.71	1457.63	299.67	12614.6	1345.56	2338.37	0.12245
19-12-11-265	547	175.7	204.1	163.5		218.96	6.88	18.67	12		175.7	6.88		153225	218.7	5.96	514973	<0.161	17.29	<0.155	1.15	2.17	0.556	11.96	3.71	50.94	21.52	110.55	25.88	255.25	54.75	12121.2	251.79	244.95	0.333656
19-12-11-266	86.3	65.3	65.8	64.7		561.22	2.72	17.8	13.38		65.3	2.72		153225	314.42	7.74	458142	<0.231	10.85	<0.204	<1.35	2.15	0.87	14.41	4.99	69.76	29.53	161.07	38.21	400.64	93.43	9876.03	107.81	207.35	0.477845
19-12-11-267	722.9	163	205.1	175.5		162.78	5.14	13.98	11.84		163	5.14		153225	374.27	5.46	461939	<0.226	20.99	<0.234	<1.13	2.14	0.389	15.99	6.05	86.63	36.41	194.04	43.35	442.77	94.71	11488.3	205.84	282.48	0.2033
19-12-11-268	150.4	63.3	65.6	62.5		102.85	0.9	2.77	1.65		63.3	0.9		153225	1369.17	4.49	435432	<0.234	73.22	<0.206	2.7	7.81	2.95	59.93	22.64	307.15	124.61	640.81	139.46	1348.52	282.86	12908.2	1717.03	1189.86	0.416863
19-12-11-269	345.9	64.1	72.1	67.2		161.77	1.28	5.09	3.64		64.1	1.28		153225	334.19	4.86	453180	<0.223	39	<0.196	1.4	3.52	1.04	21.55	7.92	112.33	48.06	263.22	62.61	661.59	152.05	11991.1	470.39	785.82	0.365055
19-12-11-270	0.1	44.3	40.2	50.2		276.71	1.62	8.43	3.7		44.3	1.62		153225	179.08	3.29	461966	<0.246	31.99	<0.235	<1.26	2.36	0.76	12.29	4.44	57.9	23.26	126.73	30.34	324.19	74.64	11494.5	334.72	388.78	0.431421
19-12-11-271	2574.6	2551.5	2563.7	2603.6		15.52	19.53	9	39.39		2574.6	15.52		153225	261.69	8.22	454318	<0.189	53.56	<0.136	1.46	3.82	0.98	18.42	5.8	67.13	23.62	111.87	23.37	215.04	43.13	10962.1	274.02	429.53	0.357165
19-12-11-272	267.3	193.6	199.1	192.9		158.07	3.98	12.67	8.92		193.6	3.98		153225	171.71	3.56	461242	<0.213	12.59	<0.142	<1.17	0.94	0.361	4.88	2.03	28.12	12.14	68.53	16.8	186.54	43.88	11130.1	220.57	267.69	0.515291
19-12-11-273	442.5	176.6	196.4	236.1		66.73	2.4	5.1	7.09		176.6	2.4		153225	261.75	5.22	458623	<0.145	6.82	<0.194	<1.32	2.85	0.166	17.06	5.3	66.37	24.26	117.95	24.96	237.07	48.56	12342.2	381.85	842.68	0.0727806
19-12-11-274	228.2	203.7	205.5	243.3		386.85	6.66	34.73	15.53		203.7	6.66		153225	393.47	3.63	440315	<0.237	13.96	<0.168	1.09	2.14	0.624	15.8	5.74	80.07	32.54	176.22	40.97	413.66	93.42	10775.2	112.04	144.89	0.328072
19-12-11-275	404.8	198.2	215	206		287.77	5.41	26.84	14.36		198.2	5.41		153225	228.94	5.72	450410	<0.202	11.5	<0.193	1.34	2.17	0.68	13.61	4.58	58.04	22.99	115.58	26.06	254.13	54.16	9910.67	131.75	134.71	0.382533
19-12-11-276	160.3	64.2	66.8	64.9		305.21	2.32	9.02	6.56		64.2	2.32		153225	379.44	4.49	441129	<0.223	15.1	<0.162	<1.07	2.6	1.02	15.84	5.36	72.92	30.74	166.7	39.55	421.9	99.41	10742.5	195.95	344.66	0.485909
19-12-11-277	178.9	22.1	23.5	20.9		582.86	1	6.93	3.55		22.1	1		153225	119.15	2.08	447185	<0.175	18.84	<0.174	<1.05	1.27	0.583	8.73	3.01	40.37	16.71	94.16	23.46	270.3	69.43	13936.8	371.85	553.21	0.535278
19-12-11-278	176.3	110.8	113.7	117.2		82.54	1.61	3.67	5		110.8	1.61		153225	232.75	3.54	472185	<0.134	10.16	0.15	2.53	6.7	0.292	45.73	16.09	212	78.72	369.89	71.78	626.54	118.41	14204.8	461.05	1355.94	0.0509993
19-12-11-279	265.8	196	201.3	205.4		118.55	3.36	9.41	6.57		196	3.36		153225	212.52	3.41	480100	<0.182	17.31	0.258	3.51	5.83	2.19	33.04	9.92	123.77	45.93	233.61	52.69	527.42	112.37	11778.5	500.62	463.04	0.482402
19-12-11-280	754.2	765.9	762.3	773.9		101.04	13.3	25.57	27.71		765.9	13.3		153225	371.4	6.08	459491	<0.227	14.86	<0.224	2.04	3.77	0.95	23.45	7.65	97.53	37.37	182.53	37.01	339.82	69.68	9544.53	78.17	91.06	0.308888
19-12-11-281	438.9	17.2	20.6	17.2		265.25	0.51	2.57	0.91		17.2	0.51		153225	165.27	3.77	455136	<0.247	75.95	0.223	2.9	5.88	2.41	29.25	8.39	96.15	36.14	181.38	41.06	420.22	94.19	12146.1	1787.13	1321.63	0.561804
19-12-11-282	204.3	212.5	211.6	213.8		163.83	3.96	13.86	7.52		212.5	3.96		153225	232.88	3.42	412914	0.25	18.64	0.28	2.69	3.45	0.94	17.37	5.5	73.71	30.19	155.46	36.34	365.85	82.58	10617.6	309.21	329.86	0.371226
19-12-11-283	316.2	61.1	67.9	59.2		506.69	3.74	16.76	6.24		61.1	3.74		153225	296.59	17.76	509580	<0.134	34.4	0.64	7.15	11.83	1.51	49.8	14.9	177.28	61.69	277.54	55.88	487.15	92.8	12054.6	376.13	281.07	0.190191
19-12-11-284	150.9	68.3	70.6	69.5		280.12	1.89	8.72	5.09		68.3	1.89		153225	534.23	3.98	444002	<0.150	23.97	<0.132	2.13	5.5	1.99	34.1	11.93	159.51	63.31	322.71	71.16	686.71	144.28	12074.9	226.73	321.29	0.444236
19-12-11-285	432.9	66.8	77.8	64.7		313.3	2.19	11.39	7.2		66.8	2.19		153225	295.84	7.08	451845	<0.242	13.72	<0.176	<1.16	1.7	0.67	12.44	4.77	66.71	28.98	160.89	37.83	395.05	92.51	10718.8	178.47	282.02	0.44541
19-12-11-286	317.2	17.2	19.5	16.1		613.06	0.91	6.27	2.35		17.2	0.91		153225	113.57	2.51	449324	<0.213	31.32	<0.153	<1.14	1.54	0.66	9.04	2.86	35.65	14.59	80.51	19.15	210.32	49.1	11963.3	541.64	558.74	0.540778
19-12-11-287	93.9	92	92	93		204.92	2.45	7.76	4.55		92	2.45		153225	125.72	2.63	409442	<0.253	36.74	<0.202	1.54	2.65	1.08	12.96	3.97	48.03	18.99	102.37	24.25	267.09	65.32	10778.7	788.4	760.99	0.563401
19-12-11-288	0.1	19.2	18	20.1		185.87	0.63	2.46	1.16		19.2	0.63		153225	142.41	3.09	463774	<0.175	52.96	<0.148	1.02	2.79	0.97	16.97	5.76	74.13	30.83	170.35	42.36	470.42	110.91	13055.9	1515.97	1279.83	0.430971
19-12-11-289	84.1	17.9	18.4	18.8		424	0.7	3.66	1.67		17.9	0.7		153225	159.62	3.29	417820	<0.255	39.65	<0.249	<1.46	2.74	0.88	15.57	4.77	60.13	23.55	130.02	31.32	337.91	80.56	11604.7	947.33	1108.27	0.411891
19-12-11-290	482.5	487.6	486.3	422.9		41.17	4.64	6.91	9.14		487.6	4.64		153225	609.39	12.47	440841	0.22	22.19	0.5	6.72	19.75	4.64	93.43	23.15	216.88	63.93	273.11	52.54	452.51	83.12	11841.2	412.48	701.68	0.330226
19-12-11-291	1337.5	15.2	28	20.2		366.61	1.07	5.59	2.64		15.2	1.07		153225	279.78	7.2	484219	<0.185	42.6	0.264	3.47	5.2	2.29	22.91	7.19	84.97	31.02	155.8	35.13	351.91	74.91	11589.3	571.16	643.18	0.641417
19-12-11-292	104.1	65	66	65.8		148.5	1.21	4.06	2.79		65	1.21		153225	367.06	3.81	445007	<0.171	34.08	<0.170	1.21	2.79	1.01	20.64	7.44	104.58	41.46	215.87	48.92	492	107.93	12318.9	607.29	826.01	0.406896
19-12-11-293	120	46.5	47.8	48.9		370.24	1.48	8.13	9.88		46.5	1.48		153225	272.16	11.58	455060	<0.186	11.38	<0.164	1.34	1.74	0.225	9.7	3.41	45.16	17.67	91.96	20.69	203.03	43.29	12330.4	113.2	428.98	0.167433
19-12-11-294	136	67.1	68.9	63.2		437.96	2.5	14.05	7.88		67.1	2.5		153225	276.08	5.77	449934	<0.193	12.07	<0.160	2.18	3.47	1.11	18.69	6.2	78.12	30.9	163.25	37.53	388.68	88.15	11664.6	156.33	227.46	0.421379
19-12-11-295	0.1	64.1	60.4	76.1		330.24	2.5	11.03	8.31		64.1	2.5		153225	263.83	4.63	485995	<0.212	13.22	<0.138	<0.84	1.41	0.73	11.08	3.98	56.23	24.08	135.2	32.51	358.21	84.66	12496.7	160.33	316.02	0.564629
19-12-11-296	39.3	62.1	61.4	60.3		119.23	0.94	2.98	1.61		62.1	0.94		153225	546	5.54	444495	<0.239	83.58	<0.166	2.06	6.04	1.9	42.67	15.42	206.22	83.53	436.05	97.69	997.2	214.91	12033.8	1493.42	1339.41	0.361821
19-12-11-297	180.6	71.1	74.3	75.8		86.13	0.97	2.6	3.28		71.1	0.97		153225	1855.26	4.26	433496	<0.209	13	<0.154	<1.06	3.6	0.476	36.39	17.91	276.15	117.28	637.86	143.73	1401.84	294.91	14458.2	452.97	1480.48	0.127141
19-12-11-298	1134.4	1180.9	1163.6	1176.8		58.97	17.16	20.01	29.27		1134.4	58.97		153225	252.51	19.08	444038	<0.139	13.75	<0.193	<1.69	2.54	0.228	12.05	3.8	47.27	16.5	75.12	14.88	130.71	24.89	9732.88	120.67	106.57	0.125992
19-12-11-299	1006.7	994.2	997.1	1036.5		24.44	8.02	7.61	21.92		994.2	8.02		153225	191.29	3.2	443489	<0.148	9.01	<0.154	<0.93	1.4	0.211	9.58	3.31	42.67	17.04	86.56	18.4	176.7	36.73	11302.8	168.81	650.68	0.176139
19-12-11-300	1193.2	1170.7	1177.5	1162.1		130.6	34.46	46.15	38.82		1193.2	130.6		153225	306.65	28.05	448120	<0.304	16.5	<0.251	<1.67	3.1	0.88	14.92	4.43	49.94	16.92	72.32	13.97	121.52	23.61	8941.74	99.15	36.95	0.395582
19-12-11-301	234.8	16.9	18.5	15.9		149.79	0.34	1.2	0.42		16.9	0.34		153225	255.58	8.36	468563	0.266	132.03	0.29	4.92	7.96	2.27	38.66	11.83	148.29	59.45	320.42	74.09	769.95	171.74	10571.3	8310.98	3529.79	0.395601
19-12-11-302	516.4	55.4	67.2	60.9		501.19	3.71	16.93	6.5		55.4	3.71		153225	510.03	15.94	493362	<0.155	28.21	0.36	6.32	12.27	3.11	74.06	24.31	296.47	106.7	493.47	98.27	877.37	171.7	8746.25	347.02	240.96	0.315403
19-12-11-303	315.9	67.3	74.6	70.3		206.1	1.68	6.75	4.58		67.3	1.68		153225	390.76	4.95	439857	0.364	28.15	<0.172	1.18	2.48	0.71	16.31	5.97	84.93	36.35	200.05	47.23	490.73	111.33	10417	290.83	487.7	0.341291
19-12-11-304	757.9	73.5	98.5	72.2		118.74	1.62	5.15	2.22		73.5	1.62		153225	908.85	11.18	392433	<0.22	81.2	0.31	5.44	10.91	3.79	70.6	24.51	310.32	121.63	589.61	123.6	1132.63	233.37	8244.09	1838.78	1026.39	0.417488
19-12-11-305	0.1	67.9	57.7	59		0	1.75	6.37	4.68		67.9	1.75		153225	283.72	4.74	461535	<0.140	19.17	<0.161	<1.00	1.99	0.72	13.28	4.65	65.15	28.4	160.34	39.03	419.46	101.61	11035.4	326.49	563.03	0.42818
19-12-11-306	1055	944.4	977.2	1009.9		35.99	9.99	10.75	30.19		944.4	9.99		153225	202.51	6.96	495582	<0.110	4.73	0.119	1.98	3.73	0.351	15.64	5.27	59.3	22.31	109.6	22.85	220.14	44.6	11583.8	133.98	454.62	0.140493
19-12-11-307	10.2	17.5	17.4	22.2		692.78	1.07	6.1	2.61		17.5	1.07		153225	230.7	3.37	453275	<0.180	31.03	0.16	1.79	3.67	1.48	15.53	5.3	63.6	25.55	132	30.61	318.84	73.16	9851.81	411.99	459.56	0.599325
19-12-11-308	353.8	195.7	208	195		165.37	4.18	14.06	7.85		195.7	4.18		153225	234.8	4.41	473579	<0.192	16.16	0.25	1.49	2.44	0.74	14.26	4.77	60.66	25.09	127.7	30.19	320.7	69.2	9995.58	245.32	239.5	0.383527
19-12-11-309	0.1	30.5	27.7	46.8		280.34	0.99	6.08	4.6		30.5	0.99		153225	416.68	4.47	445993	<0.234	38.65	<0.179	1.51	3.67	0.99	25.62	10.11	141.67	58.88	309.47	69.82	673.76	143.05	10158.7	300.79	767.67	0.312128
19-12-11-310	1047.6	1073.6	1063.9	1050		89.24	22.23	28.63	73.18		1047.6	89.24		153225	64.63	4.14	456185	<0.184	1.95	<0.113	<0.84	0.37	0.161	2.03	0.65	8.54	3.38	19.42	4.73	48.11	10.14	5241.34	19.5	58.39	0.567932
19-12-11-311	0.1	76.2	72.4	52.5		1317.56	8.38	61.55	39.5		76.2	8.38		153225	174.1	5.36	443577	<0.302	6.39	<0.216	<1.37	1.09	0.398	7.19	2.34	31.03	12.19	65.41	14.98	157.13	37.1	9635.38	51.97	90.83	0.434635
19-12-11-312	687.8	14.1	18.9	14.4		697.58	1.07	7.61	2.65		14.1	1.07		153225	119.98	2.77	442261	0.129	27.61	<0.198	1.2	2.02	0.87	10.14	2.85	35.48	13.32	68.19	16.18	170.59	42.32	9593.48	569.37	552.08	0.587684
19-12-11-313	335	20.9	23.9	14		802.39	1.69	10.7	5.12		20.9	1.69		153225	259.98	4.73	425394	<0.268	23.06	<0.179	<1.49	2.34	0.9	12.8	4.12	49.04	19.15	97.92	21.99	219.21	49.01	8801.08	185.2	242.33	0.502746
19-12-11-314	65.9	61.2	61.3	61.4		663.46	3.64	20.17	14.3		61.2	3.64		153225	230.54	5.74	472910	<0.226	9.8	<0.205	<1.16	1.12	0.412	7.04	2.66	39.03	17.1	97.39	23.16	247.78	60.3	9977.99	80.57	167.53	0.448561
19-12-11-315	566.1	13.9	17.6	14		492.55	0.89	4.51	2.67		13.9	0.89		153225	104.88	1.8	482327	<0.247	34.96	<0.137	1.37	2.29	0.92	12.08	3.91	52.31	21.79	120.35	28.83	312.07	76.29	11080.8	628.33	918.82	0.534757
19-12-11-316	502.1	17.5	21.6	17.2		198.31	0.5	1.95	0.94		17.5	0.5		153225	118.9	2.17	448618	<0.257	40.04	<0.177	1.28	1.46	0.74	9.19	3.16	41.03	17.29	99.12	24.97	282.39	69.27	11026	1541.42	1492.07	0.617614
19-12-11-317	61.5	64.5	64.4	63.7		207.27	1.43	5.62	3.22		64.5	1.43		153225	337.77	2.91	446794	<0.265	43.96	<0.233	1.02	2.47	0.737	19.2	7.11	100.76	42.31	229.23	53.84	547.58	122.34	10799.1	516.93	704.19	0.327181
19-12-11-318	391.5	14.4	16.9	24		1506.42	2.46	18.73	7.15		14.4	2.46		153225	269.21	6.86	453544	<0.219	23.43	<0.246	1.75	3.52	1.41	19.03	6.01	76.4	30.29	158.81	35.01	349.25	77.82	8412.95	198.1	239.65	0.526681
19-12-11-319	0.1	19.3	16.4	18.7		81.34	0.57	3.32	1.17		19.3	0.57		153225	161.98	2.93	447869	<0.276	43.87	<0.210	1.75	3.84	1.46	19.88	6.8	84.51	34.05	178.52	42.61	447.16	106.76	10841.1	1443.8	1267.46	0.510856
19-12-11-320	315.1	19.5	22.1	19.8		559.25	1.14	6.31	4.18		19.5	1.14		153225	153.38	5.11	455358	<0.251	24.81	<0.180	<1.08	1.61	0.714	9.64	3.26	42.96	18.88	105.31	26.62	304.78	77.38	10843.7	456.58	802.44	0.554072
19-12-11-321	0.1	18.5	16.2	24.4		679.98	1.12	8.54	3.83		18.5	1.12		153225	107.48	2.53	449754	<0.240	24.97	<0.185	<1.49	1.48	0.554	7.76	2.7	36.54	15.05	84.49	20.87	225.96	54.36	9685.68	298.61	445.39	0.499767
19-12-11-322	142.9	46.7	48.6	45.9		117.2	0.68	2.38	0.8		46.7	0.68		153225	293.29	6.25	436574	<0.218	234.46	0.3	5.72	9.2	1.74	47.45	13.97	170.07	67.64	362.43	87.52	914.86	200.72	8859.03	5086.2	2324.45	0.254599
19-12-11-323	0.1	17	15.1	20.5		698.4	1.34	7.73	3.95		17	1.34		153225	116.39	2.5	497621	0.181	27.3	<0.124	<1.05	1.4	0.57	8.88	2.9	40.86	17.32	98.14	24.59	275.99	66.55	11093.5	317.02	448.98	0.494224
19-12-11-324	465.7	18.7	22.7	17.6		588.61	1.17	7.09	3.3		18.7	1.17		153225	178.63	2.11	447242	<0.30	26.72	<0.205	1.49	3.11	1.16	16.15	4.98	62.6	24.38	133.02	31.08	330.28	79.75	9451.76	411.46	520.31	0.500393
19-12-11-325	318.7	70.7	78.4	72.2		164.23	1.59	5.53	3.62		70.7	1.59		153225	390.21	4.85	436046	<0.270	32.11	<0.172	<1.54	2.55	1.01	18.24	6.73	89.74	37.92	209.64	49.12	517.73	120.19	9573.02	539.45	765.7	0.45275
19-12-11-326	8.1	63.2	61.8	60.3		122.63	1.01	3.04	1.61		63.2	1.01		153225	1229.99	5.63	466279	3.06	92.45	1.1	6.62	6.51	2.14	33.43	11.84	151.22	61.89	326.2	75.33	773.03	172.64	9975.23	1756.63	1556.5	0.443481
19-12-11-327	0.1	18.2	16.5	18.5		706.25	1.23	8.13	4.52		18.2	1.23		153225	279.46	2.15	414906	<0.30	24.23	<0.187	<1.42	2.38	0.85	12.69	4.48	58.77	22.72	121	27.94	294.22	66.91	9389.53	366.34	631.18	0.472845
19-12-11-328	454.1	42.8	50.9	69.1		75.85	0.67	1.58	4.05		42.8	0.67		153225	711.44	5.28	486388	<0.23	42.91	0.3	1.67	4.63	<0.129	32.68	16.14	251.44	109.01	646.83	156.3	1594.83	323.26	22835.8	652.27	5557.19	n.a.
19-12-11-329	155.2	20	21.1	20.6		290.78	0.55	2.79	0.71		20	0.55		153225	315.06	5.87	395658	0.29	87.81	0.4	5.88	10.75	3.02	43.24	12.53	131.33	46.17	225.56	47.82	457.65	98.43	8110.87	1905.36	1226.39	0.428232
19-12-11-330	4.1	66.9	65.2	64.9		275.45	1.78	7.7	5.61		66.9	1.78		153225	269.99	2.78	443276	<0.227	25.42	<0.186	<0.97	1.59	0.404	10.91	4.23	60.44	25.99	146.17	35.01	365.47	83.78	10449.9	241.93	447.31	0.296545
19-12-11-331	329.4	20.3	23.1	22.7		637.81	1.08	7.8	3.72		20.3	1.08		153225	116.52	2.42	443476	<0.248	23.03	<0.266	<1.55	1.23	0.339	6.04	2.15	26.85	11.32	63.43	15.49	174.78	43.83	10910.9	394.81	547.78	0.380232
19-12-11-332	205.5	66.1	70	64.5		90.26	0.88	2.58	1.83		66.1	0.88		153225	1374.83	2.46	441293	<0.244	51.82	<0.206	<1.42	4.24	0.783	34.74	14.76	224.21	99.84	555.08	131.33	1353.4	296.45	11759.7	1311.24	1916.91	0.197235
19-12-11-333	564.2	20.4	25.8	20.7		533.54	1.03	7.31	3.6		20.4	1.03		153225	193.82	3.17	442888	<0.190	30.37	<0.150	1.22	2.54	0.99	14.57	4.71	59.63	23.45	129.05	30.06	309.72	70.91	9265.02	324.38	460.94	0.497517
19-12-11-334	168.5	66	68.8	68.3		743.92	4.83	26.52	8.43		66	4.83		153225	284.02	8.92	502425	<0.166	17.48	0.277	3.5	5.63	1.55	24.86	7.78	91.6	33.5	156.03	31.3	290.33	59.2	8868.5	160.63	140.7	0.40054
19-12-11-335	0.1	20.5	18.3	19.4		377.18	0.92	5.56	2.02		20.5	0.92		153225	288.14	2.89	449629	<0.247	44.25	<0.230	2.56	4.82	1.58	22.94	7.43	86.12	32.69	165.19	37.01	371.99	83.97	9561.7	674.7	650.42	0.459363
19-12-11-336	597	626.7	620.3	590.4		313.11	23.87	72.59	123.24		626.7	23.87		153225	198.59	9.62	451428	<0.171	4.49	<0.197	1.59	2.14	0.556	10.02	2.66	28.54	9.12	39.75	7.33	66.26	12.65	8761.07	13.49	36.32	0.367074
19-12-11-337	302	67.6	74.5	68		214.54	1.72	7.03	5.24		67.6	1.72		153225	437.46	2.76	449909	<0.210	24.12	<0.206	1.1	2.41	0.777	16.62	6.39	85.22	35.38	193.2	45.83	477.53	109.33	10645.9	264.23	491.52	0.375333
19-12-11-338	509.2	63.6	76.8	62.4		274.13	1.94	9.82	2.67		63.6	1.94		153225	748.61	9.48	455814	<0.232	62.11	0.78	10.76	18.65	6.16	90.06	27.72	324.32	116.11	546.14	110.24	1011.26	205.58	8066.83	739.84	386.8	0.45951
19-12-11-339	0.1	61.1	58.3	63.5		108.93	1.13	3.96	2.18		61.1	1.13		153225	738.59	6.88	428286	<0.189	73.05	<0.178	2.68	8.23	2.94	56.78	21.46	290.97	116.65	597.1	130.5	1259.57	268.66	9364.56	1014.51	1036.07	0.415785
19-12-11-340	0.1	49.3	42	45.1		669.28	3.34	22.47	8.34		49.3	3.34		153225	207.9	9.91	462670	<0.227	26.37	0.157	1.4	2.8	0.9	12.66	3.92	44.69	15.88	77.58	16.78	166.06	36.04	9902.71	166.65	168.81	0.462132
19-12-11-341	0.1	20.2	17.2	20.9		46.96	0.61	3.21	1.12		20.2	0.61		153225	186.35	3.23	438296	<0.219	56.26	<0.168	1.6	3.58	1.25	20.11	6.56	78.31	29.55	149.67	32.92	332.45	76.24	11083.5	1229.02	1056.8	0.450383
19-12-11-342	62.9	68.7	68.6	67.5		234.93	1.6	6.86	4.54		68.7	1.6		153225	593.46	3.94	440662	0.215	36.92	<0.185	1.27	2.87	0.96	22.27	9.16	127.58	54.31	289.59	64.51	630.91	136.39	11078.4	340.68	524.91	0.367104
19-12-11-343	290.5	98.9	106.9	82.2		72.88	1.25	3.12	1.74		98.9	1.25		153225	371.14	7.74	403272	<0.28	16.28	<0.28	3.91	10.78	0.274	64.66	22.25	271.97	101.18	464.95	89.76	749.27	142.9	11314.8	1406.46	1353.54	0.031728
19-12-11-344	0.1	18	15.3	16.3		146.88	0.7	3.74	1.25		18	0.7		153225	200.87	3.42	456467	<0.216	59.92	<0.184	2.44	4.81	1.77	25.08	7.51	89.74	33.86	171.76	38.73	398.32	92.08	11174.1	1159.04	907.95	0.49267
19-12-11-345	0.1	196.6	177.3	198		245.16	6.44	22.78	16.21		196.6	6.44		153225	193.78	4.27	448121	<0.254	10.47	<0.157	<0.99	1.04	0.393	5.75	2.19	30.76	12.61	71.48	17.09	182.01	42.94	10402	114.49	169.1	0.491317
19-12-11-346	526.3	17.7	22	18.8		561.62	0.93	6.6	2.79		17.7	0.93		153225	176.45	3.1	495564	<0.196	33.28	<0.153	1.57	2.69	1.09	13.53	4.45	56.27	22.26	116.82	27.45	297.21	67.92	11674.4	516.54	605.6	0.552358
19-12-11-347	1293.2	1220.3	1246.8	1198		25.62	10.97	8.68	28.3		1293.2	25.62		153225	677.78	11	459112	<0.153	9.15	0.142	1.78	4.95	0.96	26.92	9.3	112.24	40.08	196.9	43.45	429.17	91.84	12508.4	153.21	579.94	0.254244
19-12-11-348	647.9	572	587.4	544.8		182.24	17.33	38.47	45.33		572	17.33		153225	152.42	13.13	449941	<0.188	21.16	<0.221	2.54	3.39	1.13	11.97	3.11	29.58	8.83	34.78	6.55	54.92	10.09	10242.1	32.78	54.46	0.542314
19-12-11-349	1005.4	826.8	876.7	1187.9		29.07	7.59	7.67	47.18		826.8	7.59		153225	156.22	4.11	441160	<0.205	4.97	<0.159	<0.96	0.79	0.193	5.37	2.09	28.6	11.72	61.75	14.49	145.3	33.43	13376.6	58.89	827.1	0.286468
19-12-11-350	0.1	66.8	64.7	67.7		174.51	1.28	5.02	3.13		66.8	1.28		153225	305.02	2.94	456813	<0.251	33.41	<0.180	<1.21	2.44	0.778	15.82	6.15	81.9	34.75	181.66	42.71	447.88	99.56	12392.4	563.14	781.12	0.382826
19-12-11-351	700.5	653.5	664	581.3		34.21	6.16	7.22	36.77		653.5	6.16		153225	524.74	7.61	442004	<0.213	0.74	<0.164	<1.20	2.72	0.152	19.23	6.81	81.37	26.48	115.15	22.71	205.06	40.64	12986.4	50.38	613.45	0.0642523
19-12-11-352	195.6	73.3	77.1	75.5		146.02	1.35	4.71	3.5		73.3	1.35		153225	469.09	3.66	417820	<0.161	35.09	<0.191	1.79	4.25	1.44	25.6	9.05	126.36	52.56	281.87	67.58	702.98	161.57	10909.7	494.78	767.85	0.422053
19-12-11-353	538.7	576.4	568.8	575.5		54.37	6.41	10.15	8.37		576.4	6.41		153225	193.83	18.05	441181	<0.210	73.75	<0.217	3.69	7.36	4.46	42.04	13.08	152.98	53.79	248.75	49.59	439.96	85.73	9021.63	517.96	328.81	0.775147
19-12-11-354	291.8	63.1	69.4	58.7		193.87	1.45	5.89	6		63.1	1.45		153225	250.59	2.5	485554	<0.203	4.97	<0.148	<1.03	1.59	0.203	12.63	5.16	70.78	28.86	150.72	31.76	298.79	63.57	12589.5	202.25	630.86	0.138489
19-12-11-355	688.5	702	698.7	788.4		129.35	16.6	30.46	28.64		702	16.6		153225	238.57	76.77	453913	<0.225	6.5	<0.191	1.64	3.1	0.26	16.49	5.12	62.44	22.69	102.51	20.09	174.33	33.82	11142.2	94.62	84.52	0.111174
19-12-11-356	1055.2	1059.7	1058.1	1048.6		25.46	8.91	7.53	17.21		1055.2	25.46		153225	637.92	4.9	452878	<0.249	3.7	0.2	3.12	8.01	0.336	46.61	15.19	187.22	65.99	303.27	57.96	496.66	93.55	12343	229.69	468.26	0.0531622
19-12-11-357	0.1	31.3	30.4	33.6		78.47	0.47	1.46	1.24		31.3	0.47		153225	93.89	1.75	446447	<0.205	34.64	<0.180	<0.96	1.74	0.7	9.2	2.67	32.69	13.18	75.73	18.67	210.58	50.69	14884.2	1375.7	2858.11	0.534871
19-12-11-358	252.2	122	128.6	129.8		184.28	2.69	9.95	7.12		122	2.69		153225	551.6	8.46	457346	<0.225	9.23	<0.169	<1.29	3.45	0.193	24.12	8.99	120.11	45.82	218.47	44.35	398.66	76.89	12341.9	218.98	345.43	0.0646813
19-12-11-359	255.2	180.9	186.3	184.6		135.74	3.58	10.02	7.82		180.9	3.58		153225	180.01	3.5	461331	<0.202	17.29	<0.192	<1.24	1.32	0.522	9.23	3.43	47.35	20.96	118.99	29.69	320.49	77.52	11320.2	279.57	359.23	0.457196
19-12-11-360	139.8	67.1	69.1	72.7		163.89	1.38	4.73	3.7		67.1	1.38		153225	328.55	3.65	457332	<0.150	35.77	<0.161	<1.14	2.02	0.677	16.2	6.2	91.9	39.29	213.66	50.85	535.36	123.03	12157.6	437.02	771.08	0.361805
19-12-11-361	129.2	64.2	65.9	74.1		310.81	1.87	9.13	6.9		64.2	1.87		153225	294.65	3.94	455281	<0.189	12.79	<0.207	1.02	1.54	0.715	11.82	4.08	56.28	24.11	135.21	31.8	338.39	81.85	10860.4	185.76	392.41	0.512338
19-12-11-362	510.8	520.9	518.9	570.9		87.99	7.83	15.89	13.99		520.9	7.83		153225	234.37	19.06	453861	<0.215	35.41	<0.195	2.09	3.22	0.696	15.04	4.06	45.22	15.53	72.16	14.61	132.95	25.97	10361	197.14	196.63	0.305757
19-12-11-363	1736	1717.7	1725.6	1767.4		29.61	18.5	12.78	40.56		1736	29.61		153225	332.07	8.2	457040	<0.225	3.92	<0.166	1.37	3.17	0.514	21.66	7.25	88.4	32.37	152.95	29.8	264.43	51.28	9881.01	68.68	126.58	0.189637
19-12-11-364	0.1	19.2	16.7	19.4		49.19	0.58	2.7	0.87		19.2	0.58		153225	285.24	5.02	451994	<0.182	97.65	0.269	5.84	10.82	3.1	47.64	13.99	156.56	55.03	256.21	54.47	513.98	107.04	10885.8	2120.54	1272.12	0.417428
19-12-11-365	143.3	175.7	173.4	179		128.08	2.75	8.77	6.68		175.7	2.75		153225	13923	3.74	454301	148.33	364.91	41.65	173.64	33.68	4.28	44.07	10.06	112.63	44.08	231.94	53.36	537.17	120.41	10630	308.2	523.19	0.33963
19-12-11-366	0.1	65.6	63.2	66.2		398.77	2.21	12.14	6.46		65.6	2.21		153225	293.8	6.29	455717	<0.223	11.95	<0.128	<1.53	1.76	0.645	10.28	3.94	53.47	21.85	117.1	27.01	281.79	63.97	10172.6	203.17	293.47	0.463582
19-12-11-367	54	66.6	66.3	71.2		165.67	1.24	4.54	3.83		66.6	1.24		153225	990.46	3.72	453469	<0.232	30.35	<0.152	<1.33	4.18	1.44	31.98	12.8	180.8	73.93	391.59	87.66	865.53	181.77	12365.9	425.63	868.28	0.380763
19-12-11-368	2464	2040.1	2258.8	2054.9		15.53	16.04	7.66	39.06		2464	15.53		153225	292.43	9.89	455275	<0.199	11.71	<0.211	<1.14	1.24	0.224	9.23	3.67	50.89	21.8	120.14	27.16	265.83	58.97	11507.3	85.32	282.7	0.202421
19-12-11-369	0.1	67.7	65.2	89.9		504.05	2.86	16.1	9.85		67.7	2.86		153225	424.36	5.62	435373	<0.24	9.86	<0.232	<1.43	2.08	0.78	11.92	4.25	53.97	22.72	122.13	28.23	300.5	68.43	10605.1	108.77	191.9	0.478899
19-12-11-370	181.8	15.5	16.6	17.4		682.56	1.15	5.88	1.29		15.5	1.15		153225	300.68	7.82	421192	<0.29	134.24	0.76	12.69	20.23	7.08	83.03	21.73	228.12	77.15	349.97	70.25	651.2	132.72	9175.2	2186.47	812.95	0.528126
19-12-11-371	321.5	16.1	18.3	16.9		333.16	0.53	2.89	1.03		16.1	0.53		153225	164.23	3.09	427510	<0.215	66.02	<0.227	1.39	3.33	1.37	19.8	5.86	68.59	26.28	132.91	30.68	323.65	74.35	10647.4	1457.8	1145.09	0.515805
19-12-11-372	280.4	94.3	101.7	90		224.55	2.73	9.85	6.01		94.3	2.73		153225	145.06	3.65	414900	<0.236	38.04	<0.225	<1.67	2.79	1.27	16.34	5.03	59.53	21.04	101.27	21.99	206.63	44.05	9839.48	395.43	505.22	0.575036
19-12-11-373	167.9	16.2	17.2	15.2		406.49	0.71	3.3	0.55		16.2	0.71		153225	251.51	9.74	460802	<0.181	222.22	0.59	10.72	18.35	4.97	69.64	18.19	195.13	65.15	290.87	57.32	531.72	103.39	10621.3	3241.81	803.94	0.425039
19-12-11-374	3205.8	3035.9	3138.6	2947.3		16.5	28.72	10.4	62.72		3205.8	16.5		153225	245.66	5.3	447262	<0.104	7.17	<0.204	1.27	2.24	1.05	12.81	4.23	53.16	20.83	107.15	23.51	229.95	52.45	8174.14	52.52	107.25	0.599253
19-12-11-375	347.9	52.1	59	54.5		106.33	0.84	2.66	2.55		52.1	0.84		153225	643.83	2.14	427435	<0.289	25.24	<0.237	1.51	4.41	<0.146	32.28	13.58	185.05	75.56	390.01	84.55	797.56	162.39	13837.2	888.9	1929.72	n.a.
19-12-11-376	0.1	20.5	19.2	20.3		309.47	0.87	3.88	1.68		20.5	0.87		153225	286.98	3.27	431319	<0.20	68.06	0.26	3.39	6.5	2.19	33.34	10.4	124.54	43.8	219.05	47.89	488.05	106.21	10843.3	1238.07	1038.53	0.454804
19-12-11-377	2332.3	1787	2052.7	1758		25.03	20	12.08	43.58		2332.3	25.03		153225	286.16	4.76	495101	<0.180	22.17	0.147	1.84	2.92	0.476	17.78	5.5	64.39	23.56	111.23	21.87	197.93	38.64	11876.5	116.7	237.45	0.201962
19-12-11-378	395	18.8	22.1	16.4		389.15	0.72	4.21	2.52		18.8	0.72		153225	89.93	1.71	453047	<0.152	21.86	<0.142	<1.20	1.06	0.396	5.91	2.1	28.39	12.6	75.45	19.99	230.83	61.13	12514.6	488.74	789.98	0.483691
19-12-11-379	1666.1	1636.9	1649.2	1639.2		14.57	11.16	5.72	21.43		1666.1	14.57		153225	265.41	2.28	454618	<0.229	5.23	0.172	2.78	7.38	0.455	32.7	8.28	73.84	20.34	77.47	13.48	108.32	19.54	13146.3	255.97	807.51	0.0895424
19-12-11-380	0.1	17.2	17	17		212.73	0.39	1.6	0.49		17.2	0.39		153225	317.65	5.45	453608	<0.181	251.28	0.346	7.04	16.63	3.77	70.01	20.03	218.97	75.01	348.78	73.23	686.53	138.32	10521.4	4311.85	2178.81	0.337781
19-12-11-381	0.1	47.8	44.8	33		935.1	3.8	25.93	23.39		47.8	3.8		153225	156.66	2.91	459686	<0.213	10.99	<0.214	<1.12	<0.42	<0.112	2.97	1.13	17.52	7.98	47	11.74	120.48	26.81	12932.9	49.97	129.2	n.a.
19-12-11-382	134.9	70.8	72.6	72.2		392.63	2.46	13.05	6.23		70.8	2.46		153225	364.84	5.69	468430	<0.169	16.31	<0.189	2.26	4.6	1.56	24.74	8.01	100.25	38.77	201.73	45.41	461.3	104.39	10836.7	216.88	251.57	0.447059
19-12-11-383	0.1	68.8	63.3	68.4		552.94	3.83	21.08	9.08		68.8	3.83		153225	299.33	12.95	463695	<0.216	16.59	<0.166	1.65	3.45	0.542	15.39	4.84	56.87	21.09	105.16	22.24	205.61	43.12	11386.1	145.62	162.76	0.2274
19-12-11-384	409.9	18.3	21.6	20.1		405.34	0.76	4.32	1.69		18.3	0.76		153225	365.73	4.96	466177	<0.195	64.01	0.215	1.98	4.92	1.62	27.65	9.37	116.34	44.16	216.81	47.53	474.56	103.49	11329.2	746.69	754.37	0.424624
19-12-11-385	252.4	200.6	204.6	210.8		236.22	5.84	19.93	14.83		200.6	5.84		153225	200.79	4.58	473833	<0.217	12.94	<0.175	<0.89	1.27	0.522	7.93	3.05	40.96	17.95	100.97	24.5	258.14	62.45	10997.3	165.73	223.3	0.502865
19-12-11-386	218.6	16.3	17.7	15.5		376.36	0.57	3.16	1.71		16.3	0.57		153225	146.77	2.97	460063	<0.227	39.63	<0.115	1.09	2.51	0.95	13.14	4.39	56.17	22.65	125.25	29.65	318.84	75.66	12035.2	838.92	1104.61	0.505718
19-12-11-387	136.5	47.4	49.1	46.3		240.18	1.11	5.17	1.88		47.4	1.11		153225	389.68	4.29	428285	<0.260	59.03	<0.196	2.29	5.21	1.37	30.74	11.29	144.02	57.85	296.52	64.56	635.66	136.69	9844.77	1034.94	756.19	0.330955
19-12-11-388	1891.7	1849.6	1868.9	1881.8		15.08	13.13	6.51	25.06		1891.7	15.08		153225	621.01	5.62	460410	<0.211	3.95	<0.202	4.02	9.58	0.341	52.89	16.76	197.95	70.16	317.75	60.68	525.21	100.33	11373.3	225.57	544.52	0.0463131
19-12-11-389	2722.3	2623.1	2678.8	2707.7		21.48	28.02	12.32	53.59		2722.3	21.48		153225	317.68	15.37	462754	<0.191	15.23	<0.189	<1.17	2.5	0.331	14.14	4.98	62.48	23.42	109.64	21.77	195.22	37.7	10894.5	64.4	84.13	0.170197
19-12-11-390	345.2	206.2	217.7	218.1		41.81	1.93	3.39	3.93		206.2	1.93		153225	249.63	6.17	450571	<0.197	19.27	<0.165	1.6	2.98	0.528	16.67	5.9	76.76	29.67	147.29	31.36	295.58	59.99	11932.7	887.9	1648.09	0.229022
19-12-11-391	0.1	46.6	44.4	48.2		60.49	0.74	2.35	1.08		46.6	0.74		153225	811.55	7.83	455515	<0.197	111.42	0.281	5.1	12.66	1.87	80.41	27.78	342.71	130.19	630.85	130.55	1201.91	240.26	9906.52	2475.31	1601.23	0.17918
19-12-11-392	937.7	852.4	876	881		37.6	9.18	9.98	21.64		852.4	9.18		153225	209.26	8.34	448186	<0.188	9.86	<0.189	1.67	2.03	2.23	9.44	2.79	31.05	11.37	55.28	12.26	126.5	31.16	12624.2	385.67	864.75	1.55736
19-12-11-393	0.1	72.9	69.1	86.1		415.95	2.65	14.91	9.68		72.9	2.65		153225	250.67	5.54	458769	<0.248	11.29	<0.175	<0.95	1.4	0.444	8.26	2.72	37.51	15.39	84.6	20.54	220.63	52.2	10436.9	113.56	222.62	0.399161
19-12-11-394	237.1	19.4	21.2	20.5		372.87	0.68	3.74	1.28		19.4	0.68		153225	295.13	5.53	460463	<0.198	70.44	0.175	2.14	5.09	1.81	28.27	8.82	109.22	40.78	205.32	45.1	451.51	99.44	10742.8	1114.38	883.46	0.461292
19-12-11-395	378.7	52.4	60	61.2		732.16	4.05	23.69	9.94		52.4	4.05		153225	302.89	5.21	445732	<0.174	27.1	<0.174	1.54	3.11	0.72	17.29	6.01	77.79	31.31	157.65	34.18	323.65	67.84	10292.2	134.05	140.68	0.300175
19-12-11-396	3264.6	73.9	354.3	1376.1		27.76	1	3.93	24.4		73.9	1		153225	164.55	<1.68	443967	<0.179	13.19	<0.179	<1.11	0.7	0.177	5.16	1.98	29.83	14.29	90.36	25.88	320.55	88.74	13062	145.13	1497.01	0.284721
19-12-11-397	738.1	15.9	21.9	20.5		613.94	1	7.58	2.07		15.9	1		153225	653.63	4.22	447219	<0.183	43.19	0.157	2.78	6.07	2.4	32.97	11.12	136.57	52.35	261.51	57.26	560.34	117.63	9809.58	499.85	434.35	0.518653
19-12-11-398	543.7	520.2	524.2	538.1		55.84	6.02	10.01	15.56		520.2	6.02		153225	115.83	2.26	447259	<0.241	1.78	<0.165	<1.15	0.59	0.356	4.15	1.54	21.6	9.3	52.21	12.49	130.76	31.99	9368.02	136.86	320.84	0.695536
19-12-11-399	906.4	861.7	873.9	885.7		73.59	13.29	20.37	34.66		861.7	13.29		153225	261.6	3.14	449052	<0.241	3.12	0.199	3.34	6.71	1.24	36.91	11.55	131.34	45.82	199.63	37.16	314.54	61.05	9115.74	49.89	98.73	0.240884
19-12-11-400	137.1	65.7	67.6	67.5		115.24	1.03	3.19	2.44		65.7	1.03		153225	586.1	4.38	447231	<0.191	51.85	<0.159	1.55	4.2	1.43	30.97	12.2	164.28	65.44	342.79	75.26	739.23	153.1	11917.4	744.69	1228.45	0.383319
19-12-11-401	0.1	21.9	21.2	20.5		918.2	1.55	11.48	2.24		21.9	1.55		153225	313.58	10.14	441878	<0.176	71.41	0.42	6.58	10.39	4.29	48.91	13.52	146.07	50.04	228.58	45.47	412.79	85.33	7523.8	675.26	319.99	0.581795
19-12-11-402	454.9	337.7	352.8	343.4		119.07	6.68	15.72	11.79		337.7	6.68		153225	697.59	5.84	428421	<0.209	27.79	0.53	8.99	17.09	5.09	80.12	24.43	287.31	100.64	476.42	95.67	848.18	168.16	8873.47	281.37	270.17	0.420529
19-12-11-403	308.8	48.2	53.7	52.1		230.44	1.2	5.57	3.65		48.2	1.2		153225	349.64	3.17	453791	<0.231	23.76	<0.162	1.63	4.23	0.225	26.4	9.49	125.44	50.37	247.21	52.35	487.71	98.23	11611.8	352.5	663.98	0.0650923
19-12-11-404	0.1	19.8	18.9	22.5		764.71	1.19	8.54	3.21		19.8	1.19		153225	108.82	2.48	459002	<0.228	26.76	<0.200	<1.15	1.38	0.523	8.02	2.44	32.45	13.72	75.81	18.24	196.19	46.63	11241.2	327.64	367.51	0.480612
19-12-11-405	623.2	174.1	208.8	180.1		149.95	4.18	13.11	7.09		174.1	4.18		153225	529.76	11.9	461978	<0.199	26.24	0.229	3.23	6.76	2	40.03	13.56	171.78	67.96	338.46	73.39	701.64	148.17	10210.8	243.19	214.48	0.371692
19-12-11-406	593.2	669.2	651.6	693.7		65.89	9.68	14.04	21.16		669.2	9.68		153225	331.9	5.63	419786	0.3	43.35	0.29	4.16	7.75	2.05	31.8	8.98	95.6	32.04	142.7	26.57	240.01	45.92	9730.44	229.23	374.27	0.399217
19-12-11-407	0.1	18.1	15	17.5		313.21	0.84	5.49	1.84		18.1	0.84		153225	309.16	3.17	418006	<0.25	43.95	<0.24	1.38	2.71	1.07	14.04	3.98	50.37	19.17	99.74	22.52	241.8	54.79	9910.93	760.71	658.37	0.530316
19-12-11-408	2573.6	83.4	272.6	176.8		118.71	3.14	15.37	10.38		83.4	3.14		153225	310.08	11.04	454363	<0.257	13.19	<0.164	1.7	2.56	0.555	13	4.13	51.54	19.87	100.96	22.23	216.47	46.2	10187.2	141.72	194.26	0.294117
19-12-11-409	3005.9	23	106.2	39.9		359.39	3.45	20.82	8.6		23	3.45		153225	327.01	13.24	402581	0.28	18.94	<0.197	1.61	2.3	1.33	17.48	5.25	67.55	25.48	131.14	28.28	278.8	60.6	7967	115.63	117.41	0.641263
19-12-11-410	1022.5	1021.1	1021	1011.1		133.33	24.66	42.79	49.98		1022.5	133.33		153225	190.55	14.46	455363	<0.234	4.29	<0.169	<1.04	1.26	0.323	7.99	2.71	33.69	12.98	63.06	12.69	117.23	23.75	8586.47	30.79	33.26	0.311217
19-12-11-411	192.1	198.7	198	195.2		68.97	2.41	5.14	6.45		198.7	2.41		153225	288.81	2.3	448520	<0.147	13.47	<0.203	<1.05	2.33	0.86	20.19	7.83	109.62	46.24	253.27	58.12	578.27	126.41	10982.7	295.48	731.45	0.383329
19-12-11-412	1956.4	1938.1	1946.2	1949.8		25.52	19.85	11.89	41.55		1956.4	25.52		153225	105.96	1.93	454810	<0.194	3.49	<0.189	<0.93	0.47	0.135	1.7	0.57	6.88	2.84	15.99	3.93	43.9	11.17	9882.71	93.92	158.03	0.461721
19-12-11-413	0.1	17.8	13	17.1		157.64	0.91	5.83	2.01		17.8	0.91		153225	148.2	2.48	446228	<0.200	42.34	<0.168	<1.09	1.93	0.78	11.22	3.73	49.57	20.85	116.37	27.71	300.01	71.19	10697.4	613.91	589.34	0.512435
19-12-11-414	386	308.6	317.6	344.6		103.7	5.76	12.3	13.07		308.6	5.76		153225	360.62	50.18	464908	<0.120	9.98	0.47	8.4	17.8	5.38	94.35	28.14	327.67	117.23	533.46	103.59	889.43	171.51	7642.29	216.6	326.65	0.401348
19-12-11-415	485.7	20	24.4	21.5		204.18	0.68	2.23	1.02		20	0.68		153225	185.07	4.38	494875	<0.149	89.2	0.184	3.05	6.01	2.38	30.94	8.68	95.93	35.02	166.21	37.47	378.27	82.43	12770.5	2814.78	1855.58	0.533579
19-12-11-416	789.6	795	793.1	787.5		61.22	11.56	15.27	45.54		795	11.56		153225	1186.04	9.98	418634	<0.210	1.17	<0.150	<1.34	3.87	0.202	28.76	13.33	186.63	76.72	389.7	80.39	723.26	143.77	12226.1	59.33	307.63	0.0585357
19-12-11-417	1225.2	1164.5	1185.3	1170.1		26.7	10.37	8.85	18.87		1225.2	26.7		153225	365.37	7.34	452925	<0.182	20.05	<0.206	2.55	5.99	0.73	32.15	10.89	137.13	51.62	241.14	49.51	429.28	83.77	10618.7	216.44	329.02	0.160819
19-12-11-418	240.3	152.2	157.5	163.2		166.2	3.45	10.64	7.58		152.2	3.45		153225	217.21	78.67	422076	<0.26	13.17	<0.201	<1.24	0.82	0.332	6.52	2.17	31.87	12.45	70.97	16.73	177.48	41.3	10871.9	337.46	445.76	0.438962
19-12-11-419	445.4	19.4	23.3	22.2		394.79	0.84	4.53	1.7		19.4	0.84		153225	134.56	3.28	453956	<0.214	42.01	0.128	1.38	1.87	0.83	11.23	3.4	43.05	17.53	95.18	22.5	245.58	57.26	11352.2	740.9	694.79	0.553716
19-12-11-420	1056.2	1086.2	1075.8	1085.5		47.37	13.15	14.85	39.27		1056.2	47.37		153225	413.27	8.86	461486	<0.242	1.13	<0.206	<1.06	2.58	0.169	16.45	5.56	73	28.16	139.2	28.74	264.2	55.05	9455.8	47.49	142.91	0.0793073
19-12-11-421	312.5	18.7	21.2	19		257.39	0.55	2.5	0.95		18.7	0.55		153225	190.38	3.44	457384	<0.177	50.95	<0.140	1.48	3.61	1.19	19.45	6.16	76.1	28.32	141.16	32.22	322.1	71.29	11871.1	1804.12	1415.8	0.434163
19-12-11-422	239.2	64.2	69	64		330.99	2.25	10.37	3.19		64.2	2.25		153225	818.1	8.2	475930	<0.188	58.03	0.74	11.26	19.66	7.96	92.64	29.13	338.59	122.2	582.76	119.24	1105.5	226.18	10113.9	571.9	328.72	0.570219
19-12-11-423	324.5	72.3	80.2	75		304.24	2.49	11.07	7.19		72.3	2.49		153225	383.98	4.84	468673	<0.254	13.29	<0.179	1.41	3.46	1.27	20.24	6.71	87.26	34.84	181.09	41.1	423.63	95.08	10562.5	181.59	305.08	0.463959
19-12-11-424	0.1	17.1	15	15.7		475.59	0.83	5.78	1.9		17.1	0.83		153225	180.28	1.74	465581	<0.195	48.36	<0.193	1.44	2.65	1.05	16.49	5.63	70.55	28.21	148.82	33.35	339.3	75.45	10804.1	600.66	587.25	0.485596
19-12-11-425	1280	1138.5	1187.7	1201.1		92.49	23.65	32.66	35.14		1280	92.49		153225	329.52	18.03	469698	<0.199	35.53	<0.203	1.52	2.7	0.67	13.69	4.35	54.95	20.93	103.6	22.31	213.54	43.4	9817.31	64.05	41.33	0.336907
19-12-11-426	213.5	22.6	24.4	28.7		847.34	2.03	11.44	3.58		22.6	2.03		153225	218.79	5.13	424283	<0.22	43.18	0.31	5.62	7.74	2.43	31.91	8.77	100.48	35.47	175.55	38.14	377.79	79.81	9676.46	605.18	461.62	0.472707
19-12-11-427	993.7	73	109.1	88.6		247.89	2.99	13.05	6.66		73	2.99		153225	397.83	13.48	459660	<0.173	15.72	0.272	3.35	6.18	1.1	32.32	10.22	124.81	47.13	229.71	46.03	420.67	85.21	9585.05	213.23	223.06	0.237948
19-12-11-428	1679.9	1672.5	1675	1877.4		34.89	20.38	14.84	39.32		1679.9	34.89		153225	263.11	12.33	458288	<0.218	12.3	<0.169	1.92	3.01	0.366	14.89	4.89	55.92	19.87	93.81	19.26	171.1	34.69	11053.8	118.44	172.37	0.167136
19-12-11-429	1488.7	1402.2	1436.2	1443.9		33.29	15.96	12.73	76.83		1488.7	33.29		153225	882.8	6.14	456175	<0.183	2.62	<0.167	1.04	3.72	0.237	27.63	10.63	133.73	46.92	217.7	42.8	380.98	73.01	12358.6	58.02	375.24	0.0714671
19-12-11-430	244.6	31.1	33.9	48		175.18	0.64	2.6	34.27		31.1	0.64		153225	248.22	3.55	448955	<0.219	5.38	<0.179	<0.99	0.72	0.283	4.73	2.7	43.31	16.7	78.02	14.38	114.96	20.86	14660.9	27.29	1413.45	0.468823
19-12-11-431	209.8	206.8	206.9	236.7		195.82	4.45	16.4	8.02		206.8	4.45		153225	546.4	5.7	439691	<0.195	22.52	<0.160	1.14	3.5	1.08	23.22	8.67	116.35	47.57	246.35	54.79	526.43	114.28	9754.56	236.39	190.05	0.36625
19-12-11-432	98.3	17	17.6	18.1		333.01	0.53	2.66	1.09		17	0.53		153225	123.9	2.64	407439	<0.258	40.56	<0.181	1.25	2.46	0.92	10.87	3.03	36.88	14.22	75.89	17.89	197.69	47.58	10770.1	1270.98	1199.7	0.543907
19-12-11-433	267	68.6	74.4	80.2		400.1	2.69	13.93	8.91		68.6	2.69		153225	316.98	8.43	444817	<0.169	12.66	<0.184	1.05	2.2	0.85	13.72	4.81	64.65	26.33	139	31.74	324.5	76.49	8843.69	117.96	208.92	0.472988
19-12-11-434	773.2	749.5	754.9	746.2		33.88	6.88	8.07	17.75		749.5	6.88		153225	359.47	20.97	444729	<0.206	3.52	<0.216	2.29	5.17	0.228	23.03	6.49	60.9	15.76	57.57	9.86	77.95	13.98	12589.5	141.88	464.65	0.0638796
19-12-11-435	491.8	17.6	21.6	17.9		342.64	0.79	3.57	1.53		17.6	0.79		153225	135.49	3	444011	<0.185	35.59	<0.157	<1.14	1.56	0.6	9.84	3.44	46.55	20.5	121.99	29.7	332.69	81.37	11113.5	945.01	964.27	0.468178
19-12-11-436	85.8	17.6	18.1	21		331.8	0.53	2.73	1.19		17.6	0.53		153225	125.75	2.4	416402	<0.25	30.02	<0.216	<1.29	1.38	0.57	10.59	3.21	41.96	17.94	102.08	24.71	276.11	69.75	10656	1063.83	1180.03	0.455834
19-12-11-437	321.8	66.3	73.6	70.4		180.03	1.41	5.8	4.17		66.3	1.41		153225	1149.28	4.81	453657	<0.217	22.35	<0.173	1.07	2.85	0.77	26.38	12.77	193.81	82.78	439.9	99.32	948.2	194.62	12133.6	370.03	631.11	0.271488
19-12-11-438	373.8	17.9	20.8	17.8		341.55	0.72	3.39	1.57		17.9	0.72		153225	204.97	3.12	449027	<0.168	47.15	<0.130	1.13	2.78	1.11	16.74	5.46	71.01	28.98	158.06	36.88	391.82	92.91	10515.2	800.46	881.22	0.497442
19-12-11-439	785.2	60.2	82.3	64.3		379.49	3.04	15.68	8.87		60.2	3.04		153225	475.61	9.31	452311	<0.239	21.94	<0.198	1.36	3.03	1.28	20.73	8.53	116.65	49.51	261.37	59.14	586.58	129.98	8324.41	151.35	215.07	0.493752
19-12-11-440	748.1	720.2	726.5	762		102.67	14.63	24.72	29.99		720.2	14.63		153225	589.01	3.68	455243	<0.207	4.42	<0.157	2.15	5.34	0.67	31.02	10.46	125.27	47.04	220.62	42.06	369.45	71.81	9750.78	117.04	150.6	0.159149
19-12-11-441	0.1	17.1	14.7	18.9		191.99	0.6	3.75	1.6		17.1	0.6		153225	150.78	2.99	427384	<0.219	30.01	<0.173	<1.10	2.53	1.1	15.02	4.76	60.04	24.19	127.93	30.67	332.37	79.83	10278.1	610.24	881.93	0.545528
19-12-11-442	900.4	416.6	499.2	502.2		41.57	4.61	7.35	12.6		416.6	4.61		153225	520.35	14.35	476176	0.242	7.88	<0.145	1.61	3.88	0.58	25.72	9.74	121.13	46.86	229.12	47.09	416.86	81.58	11807.9	267.66	691.2	0.177499
19-12-11-443	454.7	16.8	20.3	19.2		485.89	0.8	5.06	1.67		16.8	0.8		153225	145.48	3.68	449228	<0.186	51.52	<0.156	1.48	2.86	1.21	18.25	5.87	73.43	29.48	157.8	36.74	378.95	87.22	9854.45	603.93	579.69	0.512024
19-12-11-444	2144.3	899.8	1343.2	1450.9		12.52	6.1	4.8	13.91		899.8	6.1		153225	610.37	41.95	422994	0.75	40.31	0.82	7.54	10.99	2.48	50.71	16.8	210.47	80.45	398.32	84.98	776.47	153.22	10808.9	1539.15	2527.08	0.321163
19-12-11-445	1670.6	1645	1655.5	1667.2		32.06	18.53	13.56	26.84		1670.6	32.06		153225	263.64	12.09	450238	<0.214	55.33	0.159	2.3	3.82	0.93	15.85	4.53	53.42	19.28	91.81	19.32	176.93	35.66	9761.4	203.06	140.35	0.36539
19-12-11-446	232.7	325.3	314	369.2		380.41	12.14	49.32	32.91		325.3	12.14		153225	201.96	7.56	455643	<0.170	11.4	<0.149	<0.97	1.45	0.77	7.39	2.26	27.42	10.43	53.96	11.44	117	26.16	8682.94	33.85	45.21	0.719124
19-12-11-447	926.4	893.3	902.3	1328.1		241.77	35.05	73.94	105.59		893.3	35.05		153225	284.84	11.68	456747	<0.241	38.19	<0.160	1.59	3.28	0.91	13.94	4.31	49.78	17.83	83.15	17.34	164.34	36.14	8968.25	18.75	24.56	0.411427
19-12-11-448	1582	826.3	1060.5	1045.9		30.93	8.76	9.96	18.6		826.3	8.76		153225	368.57	4.67	444086	0.16	43.52	0.175	2.27	4.42	1.39	24.02	8.22	104.33	42.13	218.45	48.37	475.59	102.39	10492.9	334.08	459.87	0.412417
19-12-11-449	0.1	16.6	15.8	15.7		255.72	0.47	2.42	1.01		16.6	0.47		153225	148.62	3.15	450531	<0.198	68.88	<0.173	<1.13	2.02	0.83	12.98	4.86	67.59	29.94	179.98	46.03	530.67	133.74	12083.6	1387	1469.89	0.495547
19-12-11-450	205.3	125.9	129.9	125.6		102	1.82	5.31	3.08		125.9	1.82		153225	324.34	3.82	473575	<0.185	27.37	0.385	4.63	7.52	1.69	38.95	12.52	158.08	60.22	302.22	65.86	649.35	138.75	11241.5	1163.78	863.19	0.301886
19-12-11-451	2031.3	1991.9	2010.5	2046.7		25.67	20.45	12.3	34.94		2031.3	25.67		153225	450.58	9	465494	<0.209	2.25	<0.164	<1.05	3.08	<0.102	17.06	5.81	73.94	27.78	132.14	26.37	237.17	46.37	10642.5	119.95	120.8	n.a.
19-12-11-452	1196	1145.1	1162.1	1137.9		40.52	13.02	13.56	16.78		1196	40.52		153225	529.42	16.42	460240	<0.201	64.21	0.282	5.87	10.67	2	44.4	13.27	155.16	54.56	256.25	50.55	455.23	86.64	9979	316.87	158.61	0.280916
19-12-11-453	113.4	118.7	118.3	126.2		387.83	4.43	20.38	9.86		118.7	4.43		153225	333.28	8.46	465948	<0.186	12.19	<0.163	1.81	4	0.71	22.44	7.71	94.53	35.55	168.44	33.61	302.75	59.42	9737.15	159.57	168.43	0.229106
19-12-11-454	1713.7	1627.1	1664.5	2028.5		31.18	18.48	13.24	78		1713.7	31.18		153225	153.81	5.14	460983	<0.209	9.4	<0.189	<1.15	2.19	0.169	10.61	3.32	39.59	14.6	70.16	15.44	146.74	30.99	12081.9	108.32	324.91	0.107183
19-12-11-455	0.1	17.3	14.4	19.3		37.54	0.64	3.03	1.25		17.3	0.64		153225	180.23	3.77	484756	<0.182	84.54	<0.159	1.96	4.78	1.63	27.46	8.99	106.58	40.6	201.35	43.83	438.77	96.69	11117.2	1290.17	1157.72	0.434954
19-12-11-456	138.7	67	68.9	72.1		211.7	1.5	6.26	3.68		67	1.5		153225	365.01	4.68	454007	<0.186	31.77	<0.133	1.22	2.57	0.84	17.83	7.03	97.17	42.1	225.56	51.99	533.38	121.15	10455.1	396.11	538.01	0.379364
19-12-11-457	24.3	69.5	68.2	70.8		281.95	1.76	8.31	5.37		69.5	1.76		153225	469.83	4.38	450932	<0.218	21.96	<0.135	1.42	3.15	0.99	19.7	7.06	92.14	36.97	192.12	43.19	429.7	93.81	10131.5	277.2	450.54	0.384208
19-12-11-458	1192.4	1040.7	1090.2	1070.6		61.03	16.27	19.85	32.94		1192.4	61.03		153225	217.75	13.45	455910	<0.198	7.09	0.44	7.08	10.97	0.62	48.96	13.92	150.91	50.88	215.51	39.06	319.24	58.72	8246.89	70.76	89.59	0.0817875
19-12-11-459	187.2	38.1	40.5	47.4		117.85	0.6	2.01	4.85		38.1	0.6		153225	225.71	3.91	449328	<0.170	11.91	<0.142	<0.92	0.53	0.127	4.63	2.1	32.03	15.11	97.57	27.18	338.59	91.12	14535.6	253.18	1992.89	0.247853
19-12-11-460	600.7	615.5	611.9	647.7		223.2	18.94	49.46	26.33		615.5	18.94		153225	260.32	17.22	454161	<0.224	35.7	0.47	6.06	7.13	2.06	22.74	5.21	49.03	14.66	59.14	10.71	88.36	16.71	8598.68	99.88	52.5	0.494592
19-12-11-461	599.1	558.7	566.4	645.8		294.8	20.52	63.47	39.96		558.7	20.52		153225	370.39	20.51	434120	<0.184	6.87	<0.155	2.23	4.19	0.425	17.82	4.23	37.69	10.91	42.76	7.93	62.3	12.15	9754.28	33.98	29.69	0.150365
19-12-11-462	1466.2	1493	1481.5	1494.6		46.52	20.74	18.27	51.05		1466.2	46.52		153225	186.34	13.85	419927	<0.155	5.31	<0.160	<0.85	1.05	0.172	6.19	2.24	28.76	10.91	54.03	11.27	101.88	20.55	9983.73	36.49	74.78	0.206257
19-12-11-463	504.6	16.8	20.8	15.8		400.35	0.8	4.14	0.81		16.8	0.8		153225	422.72	5.08	419038	0.283	131.61	1.47	22.86	33.78	9.14	118.04	30.24	302.94	98.66	431.81	87.07	784.7	152.82	8896.79	1973.41	752.19	0.442508
19-12-11-464	414.7	70.6	81.4	74		474.14	3.56	18.95	10.49		70.6	3.56		153225	229.74	4.73	439165	<0.182	9.5	<0.159	<1.12	2.25	0.787	12.83	4.13	54.57	22.95	123.47	28.37	295.97	68.9	10490.1	101.59	168.17	0.447806
19-12-11-465	514.2	16.5	20.4	17		428.7	0.76	4.43	1.62		16.5	0.76		153225	125.94	2.42	446697	<0.172	43.47	0.13	1.34	2.95	1.27	16.46	4.81	58.09	22.75	117.43	28.02	293.77	71.14	11553.7	905.7	937.91	0.557182
19-12-11-466	570.2	508.3	519.4	514.5		119.13	9.6	22.18	14.22		508.3	9.6		153225	251.29	22.22	445266	<0.180	33.1	<0.173	2.02	3.52	0.637	16.63	4.83	52.81	17.7	78.8	15.82	140.64	27.41	10452.8	159.5	123.52	0.254531
19-12-11-467	614.9	545.2	558.6	545.6		34.43	4.98	6.3	11		545.2	4.98		153225	305.78	4.35	443186	<0.175	18.35	<0.168	1.5	3.72	0.849	20.43	6.2	68.93	23.79	112.48	22.51	204.09	41.7	11123	279.09	735.75	0.297729
19-12-11-468	1322.9	815.4	964.4	1024.5		37.2	9.22	10.95	22.46		815.4	9.22		153225	316.83	39.47	479616	0.157	31.07	<0.157	<0.96	2.5	0.552	12.9	4.72	62.33	23.1	117.08	27.23	263.01	52.73	12217.8	158.44	298.78	0.297162
19-12-11-469	468.1	515.3	506.6	512.1		108.7	9.14	19.22	19.42		515.3	9.14		153225	292.92	10.77	450592	<0.206	10.74	<0.176	2.16	3.59	0.236	21.03	6.86	83.64	30	137.15	26.83	231.73	45.02	9940.07	95.85	129.68	0.0830357
19-12-11-470	0.1	72	66	69		323.88	2.71	13.73	8.16		72	2.71		153225	274.45	6.04	449371	<0.247	14.25	<0.191	<1.36	2.23	0.71	12.51	4.3	59.57	25.3	133.12	31.35	326.76	75	10341.9	182.5	280.95	0.410957
19-12-11-471	0.1	53.1	48.8	52.6		446.27	2.31	13.79	6.74		53.1	2.31		153225	256.44	2.94	447217	<0.205	8.27	<0.199	1.67	3.78	0.289	21.53	6.82	82.47	30.89	147.28	30.73	280.39	56.64	10292.2	193.16	266.15	0.0979376
19-12-11-472	90.7	17.7	18.3	18.3		395.7	0.62	3.36	0.94		17.7	0.62		153225	369.67	4.9	441475	<0.216	96.01	0.243	4.2	9.16	2.91	43.01	12.29	135.43	47.78	225.71	47.89	468.56	99.91	10131.9	1584.45	978.79	0.448208
19-12-11-473	265.3	62.8	68.2	77.3		389.15	2.61	12.37	9.36		62.8	2.61		153225	366.13	7.3	453600	<0.168	15.12	<0.133	1.58	2.07	0.758	12.71	4.72	68.03	29.87	166.47	40.57	430.73	102.49	9387.36	144.6	294.64	0.451784
19-12-11-474	0.1	70	62.3	64.4		58.61	1.7	7.17	5.22		70	1.7		153225	480.7	2.53	442206	<0.210	26.23	<0.161	1.1	2.81	0.864	20.03	8.14	112.02	46.62	249.11	56.67	552.87	120.61	10806	273.67	525.17	0.352079
19-12-11-475	878.4	747.6	780.8	595.7		35.9	7.52	8.71	11.48		747.6	7.52		153225	879.35	28.61	385062	0.67	31.36	3.15	23.57	24.15	10.62	72.12	21.57	238.42	74.38	311.76	59.62	494.66	89.5	8776.62	359.22	481.82	0.77796
19-12-11-476	428	18.7	22.2	21.8		568.95	1	6.64	2.34		18.7	1		153225	204.1	5.17	446987	<0.233	40.65	<0.213	1.62	3.53	1.423	20.83	6.55	80.53	30.5	153.81	33.74	325.87	70.33	9770.92	510.33	522.47	0.507332
19-12-11-477	157.3	68	70.5	66.1		373.67	2.32	12.03	3.58		68	2.32		153225	364.42	16.48	443497	<0.155	22.36	0.35	5.81	8.94	1.78	44.02	14.09	170.76	61.64	282.54	56.51	495.52	96.83	9121.93	394.96	251.91	0.274313
19-12-11-478	0.1	45.8	42	42.5		162.61	1.22	5.92	1.64		45.8	1.22		153225	389.01	4.73	444987	<0.200	141.74	0.399	6.58	11.57	2.67	54.36	16.65	188.04	67.17	318.34	66.66	616.87	123.33	9459.97	1078.77	641.2	0.32548
19-12-11-479	0.1	18.2	17.6	22.8		412.04	0.68	3.9	1.55		18.2	0.68		153225	133.02	2.18	443836	<0.216	45.45	<0.165	1.32	2.61	0.882	12.22	3.78	47.31	18.38	102.84	24.77	264.66	64.2	11179.7	884.42	912.97	0.477455
19-12-11-480	3130.9	2619.2	2917.1	2563.2		12.32	19.29	6.76	40.78		3130.9	12.32		153225	141.43	5.58	443987	<0.289	23.14	<0.169	<0.87	1.22	0.347	6.29	1.84	23.55	8.89	46.8	10.65	111.34	24.84	11232.9	102.74	298.88	0.382951
19-12-11-481	146	86.8	88.8	85.4		165.41	1.67	6.12	3.32		86.8	1.67		153225	126.2	4.09	447030	<0.227	38.8	<0.238	1.28	1.8	0.924	10.56	3.64	45.49	18.04	94.76	21.68	236.25	56.09	10551.7	594.52	662.62	0.647923
19-12-11-482	51.4	61.4	61.1	72.9		853.49	3.88	27.67	13.89		61.4	3.88		153225	241.63	4.56	452353	<0.259	7.16	<0.202	1.34	2.89	1.052	12.69	4.11	50.27	19.96	102.37	23.63	246.36	57.48	9936.73	73.72	127.42	0.531075
19-12-11-483	1092.2	1012.4	1037.5	987.4		26.53	8.83	7.84	25.77		1092.2	26.53		153225	1009.24	46.74	449054	<0.216	1.1	<0.161	<1.19	3.97	<0.096	32.47	14.51	191.87	70.17	300.89	54.03	424.71	71.81	12884.1	103	483.72	n.a.
19-12-11-484	32.3	63.5	62.6	63.9		176.68	1.63	4.48	2.8		63.5	1.63		153225	534.35	1.46	437545	<0.240	51.66	0.338	4.67	8.36	1.216	43.66	16.27	207.52	85.79	457.67	106.28	1073.81	229.38	8141.55	1100.15	1152.81	0.194584
19-12-11-485	247.6	65.3	70.4	63.1		366.91	2.29	11.94	5.76		65.3	2.29		153225	349.5	6.5	459444	<0.193	16.75	0.208	3.55	5.79	2.1	29.52	9.6	120.13	45.81	228.06	49.98	498.85	110.74	9754.26	223.89	269.8	0.491068
19-12-11-486	556.8	19	23.9	19.4		248.12	0.63	2.81	1.31		19	0.63		153225	154.52	3.22	446617	<0.229	39.17	<0.201	1.26	2.83	1.137	13.36	3.82	49.13	18.54	98.5	23.92	258.68	62.86	11984.5	1059.36	1081.48	0.565306
19-12-11-487	200	69.8	73.5	44.4		626.85	3.53	23.15	17.9		69.8	3.53		153225	201.5	4.74	456407	<0.175	7.78	<0.162	<1.02	1.13	0.532	7.48	2.76	38.13	15.84	85.93	20.62	219.88	53.08	11305.8	73.31	153.99	0.559424
19-12-11-488	374.3	70.8	80.3	66		367.56	3.07	13.79	6		70.8	3.07		153225	1214.81	3.49	422771	<0.270	29.09	<0.200	1.69	4.59	1.75	33.09	13.93	193.68	80.78	431.12	93.76	925.75	196.24	10267	354.92	374.11	0.434113
19-12-11-489	220.4	68	72.4	72.1		453.82	2.86	15.56	6.29		68	2.86		153225	271.1	30.78	455468	<0.218	18.6	<0.225	1.91	4.42	2.04	23.68	7.88	85.98	30.38	144.19	31.26	303.11	65.06	9408.71	182.53	215.04	0.609604
19-12-11-490	1207.1	1128.1	1154.9	1105.6		45.18	14.12	14.97	20.22		1207.1	45.18		153225	92.18	5.52	502211	<0.184	29.76	<0.146	<0.96	0.86	0.455	3.51	1.08	10.89	4.89	29.59	7.2	90.83	22.77	13658.7	122.2	167.51	0.800623
19-12-11-491	0.1	67.2	65	77.5		287.94	1.89	8.39	5.13		67.2	1.89		153225	216.24	3.83	437150	<0.244	23.22	<0.143	<1.06	1.83	0.856	12.37	4.24	60.54	24.93	136.05	32.08	337.49	76.66	10239.6	243.12	383.08	0.550026
19-12-11-492	227.9	71.2	75.9	65.8		154.59	1.43	4.95	3.42		71.2	1.43		153225	386.9	5.35	431518	<0.222	34.58	0.186	2.62	5.24	1.79	30.56	10.63	142.67	59.63	311.38	70.4	712.32	161.2	10166.5	485.19	722.52	0.432444
19-12-11-493	2260.8	2020.4	2141.4	1485.3		20.6	19.22	9.95	52.79		2260.8	20.6		153225	766.78	8.15	399040	<0.26	6.27	<0.26	1.94	4.6	1.84	25.05	11.52	120.22	45.67	231.72	48.25	450.81	93.17	11512	127.92	725.75	0.524028
19-12-11-494	1802.1	1734.8	1765	1695		13.61	11.76	5.33	18.03		1802.1	13.61		153225	332.94	5.43	435029	<0.220	15.41	<0.209	2.42	5.46	0.181	30.86	10.87	137.11	52.51	248.02	50.14	445.93	86.62	11601.5	400.41	903.87	0.0426289
19-12-11-495	266.9	74.1	80.1	83.1		498.66	3.26	19.36	15.05		74.1	3.26		153225	287.87	5.8	447291	<0.199	11.78	<0.206	<1.23	2.01	0.867	11.95	4.26	57.47	23.54	127.41	29.8	312.14	73.74	9862.17	103.58	219.53	0.540825
19-12-11-496	1616.4	804.7	1054.3	1282.5		45.72	11.78	14.68	41.22		804.7	11.78		153225	341.27	6.34	451406	<0.201	16.24	0.133	1.3	2.31	0.608	13.68	5.1	65.92	26.11	129.75	28.05	263.67	54.89	10340.4	92.86	245.26	0.330654
19-12-11-497	192.9	148.6	151.1	145.3		73.32	1.83	4.27	3.61		148.6	1.83		153225	393.32	3.05	449315	<0.194	8.73	<0.194	2.54	7.63	1.093	50.5	16.7	201.57	69.81	319.76	63.02	553.39	107.01	10850.7	623.12	1004.56	0.170228
19-12-11-498	165.3	198.5	195.8	205		86.68	2.64	6.46	3.95		198.5	2.64		153225	297.19	5.23	440646	<0.180	35.7	<0.244	2.29	4.38	1.5	25.85	9.02	116.4	46.67	246	56.67	573.73	127.12	9198.78	827.59	658.38	0.430966
19-12-11-499	148.3	65.3	67.5	66		182.63	1.42	5.21	3.28		65.3	1.42		153225	354.7	3.03	443639	<0.213	36.57	<0.157	<0.98	2.42	0.818	17.55	6.98	98.47	42.46	231.02	53.62	552.62	123.47	10899.8	481.65	692.23	0.383731
19-12-11-500	732.5	20.3	27.8	20		295.23	0.84	4.05	2.28		20.3	0.84		153225	96.81	1.93	418984	<0.250	23.53	<0.219	<1.23	1.16	0.465	6.89	2.15	28.29	11.88	66.57	16.82	197.86	50.89	11220.8	659.26	951.8	0.502845

## Sheet: River 2
	Age (Ma)					1s error					Age used (Ma)	1s error		Trace elements (ppm)
	Pb207/Pb206	Pb206/U238	Pb207/U235	Pb208/Th232		Pb207/Pb206	Pb206/U238	Pb207/U235	Pb208/Th232					Si	P	Ti	Zr	La	Ce	Pr	Nd	Sm	Eu	Gd	Tb	Dy	Ho	Er	Tm	Yb	Lu	Hf	Th	U	Eu/Eu*
19-12-8-1	1111	1002.6	1036.8	1062.6		65	15.22	20.41	51.05		1111	65		153225	236.05	19.16	435934	<0.152	4.75	<0.188	<1.31	1.92	0.202	12.05	3.98	49.86	18.82	88.77	18.16	160.25	31.57	9659.11	30.97	88.34	0.128389
19-12-8-2	1256.2	58.7	100.5	75.5		596.35	4.67	34.95	23.84		58.7	4.67		153225	199.16	4.04	436484	<0.198	6.49	<0.158	<1.40	1.05	0.299	5.94	2.09	27.79	12.61	70.34	17.39	198.69	47.36	9250.78	43.76	93.07	0.366018
19-12-8-3	220.7	49.5	53.1	45.2		577.99	2.72	15.29	8.18		49.5	2.72		153225	228.3	10.58	461961	<0.124	15.53	<0.172	<1.02	1.44	0.248	8.9	3.24	42.61	17.41	87.7	19.58	190.21	38.04	11036.6	134.72	185.29	0.211785
19-12-8-4	0.1	51.8	49.4	52.2		602.11	2.49	15.99	10.03		51.8	2.49		153225	167.95	5.72	443875	<0.161	5.35	<0.180	<1.13	1.24	0.489	4.87	1.72	22.5	9.59	54.19	13.93	156.89	39.78	7978.08	102.98	196.35	0.608349
19-12-8-5	296.5	53.3	58.9	51.4		259.8	1.71	6.84	4.67		53.3	1.71		153225	232.63	2.78	435331	<0.188	25.34	<0.243	<1.02	1.49	0.508	11.02	4.38	58.72	24.93	135.02	31.05	317.46	69.38	10689.1	305.16	523.57	0.383265
19-12-8-6	135.1	69.9	71.7	68.5		595.73	4.08	20.86	14.03		69.9	4.08		153225	290.27	3.97	401902	<0.159	11.47	<0.242	<1.36	1.83	0.706	11.16	4.59	60.76	25.62	139.97	31.83	335.92	78.19	8703.07	96.98	171.67	0.477602
19-12-8-7	495.5	12	14.8	13.1		252.02	0.4	1.76	1.31		12	0.4		153225	52.9	2.38	428897	<0.163	46.68	0.206	2.88	4.14	1.77	15.41	3.57	33.99	11.2	51.18	10.98	115.93	29.15	11349.2	1092.6	2383.73	0.677472
19-12-8-8	0.1	58.7	50.4	66.2		276.1	2.43	13.69	7.41		58.7	2.43		153225	251.21	4.6	443797	<0.180	9.85	<0.136	<1.15	1.08	0.517	7.68	2.71	35.89	14.73	77.03	18.3	195.5	46.14	9822.6	125.23	217.29	0.548804
19-12-8-9	342.5	63.2	70.9	65		275.86	2.17	8.81	6.83		63.2	2.17		153225	397.86	8.65	449180	<0.185	8.99	<0.174	1.49	2.9	0.718	20.35	7.03	94.95	36.78	177.11	37.1	342.7	68.64	9227.27	177.61	360.79	0.285735
19-12-8-10	128.7	48.5	50.1	53.5		276.84	1.34	6.13	3.41		48.5	1.34		153225	285.98	2.91	467484	<0.175	35.65	0.146	2.8	5.33	1.66	30.55	10.01	132.53	53.03	279.16	62.45	645.47	139.44	10862.3	510.87	666.83	0.397703
19-12-8-11	0.1	64.1	58.3	63		269.28	2.19	11.34	5.63		64.1	2.19		153225	338.28	3.77	439699	<0.202	23.4	<0.157	<0.98	2.3	0.857	14.53	5.51	73.57	30.97	166.22	38.66	404.13	94.18	10256.8	231.15	292.67	0.453214
19-12-8-12	220.1	44.1	47.5	44.6		132.29	0.76	2.66	1.8		44.1	0.76		153225	158.25	3.99	438667	<0.169	55.75	<0.160	1.52	2.78	0.74	13.46	4.22	51.07	19.38	98.76	22.66	229.51	48.1	11453.3	954.38	1491.94	0.369834
19-12-8-13	147.8	15.3	16.2	12.9		874.63	1.1	7.87	2.32		15.3	1.1		153225	87.86	2.4	442117	<0.182	32.74	<0.160	<0.99	2.31	0.915	11.11	3.22	35.95	12.76	63.7	14.01	142.27	32.63	10240.4	451.25	380.72	0.552176
19-12-8-14	53	44.7	44.8	49		267.39	1.11	5.23	2.36		44.7	1.11		153225	172.63	34.3	405176	<0.226	31.94	<0.192	<1.11	1.96	0.484	8.9	3.15	37.86	14.68	74.79	17.56	173.38	38.17	10482.8	362.26	591.76	0.354276
19-12-8-15	185.1	50.9	53.8	53.7		200.2	1.13	4.66	3.89		50.9	1.13		153225	223.38	4.69	439698	<0.261	19.52	<0.169	1.12	2.49	0.183	13.08	5.11	64.55	24.06	117.92	25.46	242.72	47.38	10192.9	347.42	820.92	0.0980318
19-12-8-16	2361.7	1960.1	2162.4	1922.3		15.39	15.3	7.21	38.71		2361.7	15.39		153225	1135.14	11.4	437699	0.492	3.7	<0.211	2.3	4.68	0.227	33.57	13.59	179.02	69.78	338.07	69.42	615.37	116.61	10454.6	111.27	507.38	0.0553665
19-12-8-17	122.9	59.7	61.2	83.3		628.68	3.03	19.15	9.39		59.7	3.03		153225	189.22	3.82	407506	<0.23	21.56	<0.186	<1.21	1.93	0.583	10.85	4.35	60.88	25.65	139.57	33.73	377.53	89.51	9310.62	274.72	426.27	0.389488
19-12-8-18	416	45.4	53.1	53.5		234.66	1.59	5.58	4.17		45.4	1.59		153225	248.25	2.93	494902	0.234	31.13	<0.139	<0.78	1.78	0.656	13.48	5.27	70.83	30.37	167.24	40.17	436.52	98.09	11240.9	432.73	660.76	0.409419
19-12-8-19	822.8	824.1	823.3	972.7		94.17	14.67	25.08	63.94		824.1	14.67		153225	172.67	3.45	449608	<0.189	3.27	<0.191	1.48	2.71	0.398	13.06	4.23	50.43	19.31	97.34	21.76	229.93	51.92	9146.12	23.61	82.31	0.204525
19-12-8-20	0.1	53.6	47.1	57		249.09	2.01	10.87	5.9		53.6	2.01		153225	175.18	5.67	445729	<0.182	10.33	<0.177	1.42	2.91	0.652	12.58	3.85	48.46	18.38	97.63	23.31	238.49	52.79	10264.2	196.85	305.73	0.329443
19-12-8-21	0.1	50.3	47.2	49.4		196.16	1.31	6.16	4.33		50.3	1.31		153225	206.44	2.6	447891	<0.223	25.88	<0.175	<0.98	1.46	0.501	9.84	4.07	60.03	27.19	159.25	40.35	450.72	108.47	10871.1	270.66	564.56	0.404095
19-12-8-22	224	64.1	68.4	79.1		669.44	3.21	23.54	13.02		64.1	3.21		153225	271.9	3.7	446177	<0.191	9.31	<0.181	1.05	1.65	0.695	11.21	3.87	51.89	20.62	109.88	25.93	279.39	64.55	10308.8	86.4	156.96	0.494037
19-12-8-23	0.1	64.3	60.3	78.7		464.42	2.52	15.74	8.7		64.3	2.52		153225	235.35	4.25	450986	<0.231	9.18	<0.159	<1.23	1.01	0.335	6.58	2.37	31.33	13.08	70.44	16.75	177.12	42.55	10503.6	107.17	202.69	0.397274
19-12-8-24	475	51.8	62	60		387.32	2.17	11.65	7.47		51.8	2.17		153225	169.62	3.01	442364	<0.238	13.98	<0.179	<1.04	0.46	0.308	4.93	1.96	25.72	11.44	65.74	16.23	176.76	41.76	10545.5	168.07	331.64	0.62527
19-12-8-25	31	50.8	50.4	69.7		978.8	3.73	27.37	13.96		50.8	3.73		153225	238.4	11.85	455051	<0.288	8.8	<0.209	0.99	1.2	0.31	9.67	3.13	40.48	15.73	79.61	17.25	161.04	32.92	9895.37	68.97	114.36	0.278213
19-12-8-26	216.1	121.7	126.3	123		284.15	3.49	15.62	9.69		121.7	3.49		153225	333.57	10.1	444891	<0.150	15.72	<0.131	1.13	2.85	0.413	16.51	5.76	71.47	26.26	120.73	24.56	218.14	42.68	9106.75	121.86	186.46	0.184066
19-12-8-27	501.1	480.1	483.6	477		52.92	5.23	8.72	13.15		480.1	5.23		153225	666.1	5.25	442655	<0.214	7.27	<0.167	<1.19	2.76	0.13	21.83	8.68	114	44.66	214.46	44.84	394.49	75.44	11770.7	150.35	392.77	0.0512013
19-12-8-28	259.3	90.3	96.7	84.7		495.41	4.3	22.89	8.27		90.3	4.3		153225	233.15	15.23	444727	<0.165	15.19	0.201	2.84	4.56	0.847	18.03	5.3	61.56	21.64	101.51	20.54	185.75	36.84	8797.07	151.4	133.07	0.285577
19-12-8-29	0.1	64.4	56	61.5		551.47	2.99	23.22	18.16		64.4	2.99		153225	247.4	3.48	442832	<0.197	9.22	<0.179	<0.90	0.86	0.434	7.16	2.7	39.09	16.84	96.13	24.01	259.51	62.07	9987.12	56.05	142.65	0.534692
19-12-8-30	258	50.3	54.8	55		388.9	1.92	10.01	5.91		50.3	1.92		153225	238.9	7.25	469804	<0.186	17.62	<0.153	<0.94	2	0.345	11.9	4.46	55.01	21.72	109.3	23.61	231.85	47.11	11242.3	183.01	323.8	0.216197
19-12-8-31	1738.1	71.5	153.6	118		297.81	4.01	24.41	13.41		71.5	4.01		153225	279.7	2.9	426808	<0.189	9.94	<0.188	1.4	2.9	1.101	15.77	5	60.74	24.08	119.39	27.37	280.61	64.67	9590.79	108.57	158.56	0.497728
19-12-8-32	203.5	61.6	65.3	63.2		127.59	1.04	3.48	1.97		61.6	1.04		153225	644.93	4.64	438285	<0.155	61.26	<0.160	1.87	5.3	1.49	39.49	14.94	193.55	77.68	397.09	87.55	871.16	184.07	10787.5	883.95	1020.46	0.314865
19-12-8-33	241.9	49.9	54	52.5		181.48	1.06	4.25	2.56		49.9	1.06		153225	256.13	2.79	445097	<0.177	37.69	<0.161	<1.07	1.85	0.693	14.7	5.59	77.86	33.29	181.7	43.66	463.58	104.55	10933.8	566.31	808.89	0.406264
19-12-8-34	158.7	71.9	74.4	91.7		956.41	6.56	39.62	31.01		71.9	6.56		153225	275.94	3.68	435721	<0.222	7.14	<0.207	0.99	1.11	0.487	7.39	2.62	36.16	15.39	85.34	19.96	220.74	54.54	9508.06	57.18	124.3	0.519834
19-12-8-35	291.5	74.8	81.7	98.6		495.46	3.25	19.67	13.21		74.8	3.25		153225	253.98	5	451580	<0.213	9.58	<0.186	<1.19	1.16	0.409	7.74	3.04	40.23	17.26	95.55	22.23	237.2	54.93	10260.7	87.3	162.01	0.417295
19-12-8-36	434	59.2	69.3	83.6		658.52	4.66	23.98	20.86		59.2	4.66		153225	331.42	4.06	483908	<0.155	6.5	<0.188	<0.78	0.94	0.46	6.43	2.71	35.3	15.84	85.99	21.24	231.95	56.55	10559.4	49.79	123.99	0.572016
19-12-8-37	492.9	551.2	539.8	533		54.83	6.14	9.84	10.38		551.2	6.14		153225	202.71	11.22	459232	<0.176	30.47	<0.197	1.94	3.24	0.372	15.59	4.52	51.7	17.33	78.42	15.83	138.49	26.64	10577.6	272.33	330.37	0.160017
19-12-8-38	326.8	52.1	58.5	53.5		217.34	1.37	5.64	3.12		52.1	1.37		153225	545.67	2.28	426648	<0.24	40.2	<0.212	<1.53	2.48	0.704	16.81	6.22	86.42	35.58	189.72	42.14	426.97	91.69	10485.5	659.11	845.27	0.333336
19-12-8-39	159.5	69.6	72.1	76		723.47	4.79	26.78	20.81		69.6	4.79		153225	247	4.63	460827	<0.197	9.3	<0.208	<0.98	1.29	0.505	7.36	2.99	38.54	16.94	94.63	23.07	249.71	61.05	9926.39	75.21	162.62	0.501045
19-12-8-40	202.5	63.1	66.8	77.7		632.05	3.22	21.32	11.97		63.1	3.22		153225	279.38	5.99	460328	<0.204	10.03	<0.213	<1.15	1.28	0.7	9.6	3.51	46.58	20.21	107.4	25.61	268.94	62.52	8998.59	91.58	151.64	0.610488
19-12-8-41	234.6	27.7	30.2	33.2		378.99	1	5.41	2.89		27.7	1		153225	141.63	5	455773	<0.177	36.16	<0.196	1.29	2.49	0.584	12.73	3.81	43.91	15.7	75.21	15.98	147.04	28.57	11621.7	371.19	598.36	0.317116
19-12-8-42	152.6	58.2	60.5	65.1		625.3	3.16	18.88	11.09		58.2	3.16		153225	360.04	3.03	462483	<0.220	9.93	<0.171	0.88	1.71	0.627	9.92	3.75	51.82	21.34	117.37	27.79	290.98	68.72	10262.1	97.86	163.05	0.465407
19-12-8-43	49.2	62.2	61.8	62.6		62.2	0.67	1.49	1.29		62.2	0.67		153225	479.19	1.77	436028	<0.192	16.71	<0.181	1.34	4.8	0.35	42.9	17.32	240.81	95.96	468.79	98.34	892.29	170.94	12048.8	1895.39	3065.07	0.0745656
19-12-8-44	412.5	50.5	58.7	56.9		311.09	1.56	8.6	6.08		50.5	1.56		153225	195.24	2.35	446266	<0.193	18.01	<0.188	<1.05	1.24	0.356	8.33	3.16	44.44	19.33	109.22	27.03	288.41	66.51	10594.8	182.09	372.9	0.338638
19-12-8-45	62.1	124.6	121.5	126.4		142.57	2.1	6.91	3.45		124.6	2.1		153225	279.4	2.84	441898	<0.162	12.6	0.381	6.63	13.99	2.17	76.74	23.67	269.52	93.43	412.29	77.58	661.09	121.3	8936.35	545.94	488.44	0.202469
19-12-8-46	0.1	56.9	52.7	69.9		1199.7	5.3	42.65	19.85		56.9	5.3		153225	340.8	10.87	451392	<0.212	8.36	<0.147	<0.96	1.81	0.43	13.16	4.71	60.82	24.34	121.04	26.27	254.88	52.22	9522.31	53.05	79.6	0.269352
19-12-8-47	34.8	60.1	59.4	87.2		530.64	2.34	14.95	7.4		60.1	2.34		153225	265.68	6.8	451500	<0.152	11.5	<0.154	1.41	2.79	0.383	16.77	5.71	70.17	26.43	126.41	25.68	229.51	45.41	10124.9	172.86	261.85	0.171179
19-12-8-48	203.6	50	53.2	39.7		706.56	3.87	19.44	12.61		50	3.87		153225	264.61	10.91	500661	<0.141	11.54	<0.144	0.84	1.85	0.305	11.16	4.26	55.83	22.15	108.21	22.52	216.87	42.9	11344.9	89.46	143.96	0.205211
19-12-8-49	345.9	44.4	50.4	43.4		143.17	0.84	3.15	2.58		44.4	0.84		153225	132.26	3.06	455722	<0.180	41.29	<0.192	1.17	2.17	0.509	10.87	3.41	43.41	17.13	92.96	21.87	229.38	47.71	12657.4	543.62	1155.83	0.3204
19-12-8-50	0.1	58.6	53.3	61		356.21	2.23	13	6.91		58.6	2.23		153225	378.24	5.41	455829	<0.256	15.66	0.163	1.13	2.17	0.915	14.59	5.35	73.25	30.72	165.93	39.74	414.3	97.4	9479.66	177.33	258.11	0.497145
19-12-8-51	40.6	53.5	53.1	53.2		276.58	1.36	6.39	2.93		53.5	1.36		153225	417.25	9.45	440767	<0.206	23.41	<0.180	2.87	5.96	1.154	32.19	10.34	128.58	49.72	234.03	48.87	448.25	89.72	9273.02	451.54	502.8	0.254707
19-12-8-52	263.9	49.8	54.4	55.4		445.93	1.96	11.68	5.23		49.8	1.96		153225	244.68	9.27	441384	<0.180	11.22	<0.164	2.14	4.49	0.891	23.23	7.4	87.66	32.88	159.23	33.24	314.73	62.71	9727.31	218.36	268.57	0.266716
19-12-8-53	90.2	64.9	65.6	61.6		546.71	2.86	17.17	12.03		64.9	2.86		153225	274.54	4.28	443900	<0.241	9.33	<0.156	<1.05	0.96	0.506	7.2	2.64	36.85	15.85	88.44	21.4	234.63	55.82	9244.45	87.72	178.02	0.588394
19-12-8-54	128.4	61.5	63.2	76		728.79	3.28	23.78	16.58		61.5	3.28		153225	223.79	4.28	443989	<0.214	8.22	<0.193	<1.00	0.79	0.303	5.65	2.17	31.39	13.26	73.65	17.83	195.47	45.63	10015.6	64.16	137.81	0.438454
19-12-8-55	125.4	67.1	68.7	74.4		372	3.15	11.41	9.13		67.1	3.15		153225	486.53	4.95	443670	<0.194	24.4	<0.195	<0.98	2.41	0.898	20.15	8.42	119.72	51.35	272.63	63.12	636.2	138.67	10252.8	222.99	382.31	0.393958
19-12-8-56	0.1	54.6	44.2	56.2		0	1.48	5.84	2.2		54.6	1.48		153225	257.14	4.05	450025	<0.201	35.48	<0.170	1.3	3.23	1.149	17.49	6.41	84.89	36.35	198.16	47.29	501.9	113.25	10551.1	667.72	613.28	0.467351
19-12-8-57	0.1	49.6	44.3	41.4		807.01	3.36	24.84	19.6		49.6	3.36		153225	207	4.66	458180	<0.228	5.3	0.093	<1.48	0.95	0.541	6.22	2	28.43	12.9	73.99	18.83	210.92	52.2	8039.31	45.83	113.67	0.680393
19-12-8-58	265.4	47.1	51.6	54		388.33	1.99	9.4	6.44		47.1	1.99		153225	262.59	3.73	481724	<0.151	20.43	<0.153	<1.02	2.11	0.11	13.95	4.93	68.18	29.19	151.03	33.84	328.24	66.78	11951.5	200.43	382.69	0.0619846
19-12-8-59	108.6	64.3	65.5	67.2		247.68	1.58	7.03	4		64.3	1.58		153225	653.37	6.19	457486	<0.171	22.98	<0.157	2.05	4.84	2.28	31.87	11.28	152.6	65.08	354.33	83.57	875.14	201.63	9338.28	329.91	478.31	0.56123
19-12-8-60	0.1	52.7	47.9	54		0	0.93	3.57	2.73		52.7	0.93		153225	147.42	3.77	457669	<0.192	32.3	<0.168	0.88	1.65	0.533	9.89	3.35	41.14	16.25	84.02	20.09	213.15	47.74	11483.1	505.99	1059.05	0.403373
19-12-8-61	186.3	65.8	69.1	69.3		626.1	4.1	21.57	15.17		65.8	4.1		153225	317.29	5.8	423349	<0.24	11.97	<0.26	<1.32	1.5	0.696	11.69	4.4	59.78	25.28	136.83	31.69	343.86	81.69	8880.5	113.07	203.35	0.508131
19-12-8-62	403.8	45.9	53.4	52		300.71	1.58	7.48	4.65		45.9	1.58		153225	212.8	2.27	442246	<0.206	24.8	<0.207	<0.93	1.7	0.452	8.57	2.97	42.37	17.63	100.34	24.1	259.71	58.28	10307.4	286.43	431.43	0.362029
19-12-8-63	70.7	63.6	63.7	50.5		514.4	2.49	15.52	11.55		63.6	2.49		153225	281.21	4.33	451016	<0.251	15.78	<0.208	<1.13	1.76	0.723	10.52	4.21	59.03	25.75	139.86	33.51	353.24	84.53	9610.12	102.15	231.51	0.513681
19-12-8-64	73.4	49.5	49.9	51		417.47	1.53	9.64	4.49		49.5	1.53		153225	189.92	3.75	448379	<0.212	19.09	<0.151	<1.07	1.35	0.414	7.76	2.7	37.93	16	87.52	21.28	226.65	53.56	9963.58	305.11	449.18	0.391041
19-12-8-65	1427.7	1251	1317.1	1364.2		34.11	13.63	12.31	34.44		1427.7	34.11		153225	461.29	22.38	445055	<0.206	3.9	<0.218	<0.99	2.34	0.239	15.91	5.56	75.05	28.09	137.22	28.61	253.46	49.48	9910.78	67.06	155.46	0.11975
19-12-8-66	24	120.6	116	123.8		332.92	3.63	16.57	10.66		120.6	3.63		153225	182.04	2.96	452013	<0.226	7.55	<0.184	<1.26	1.25	0.268	7.21	2.51	33.17	14.22	74.64	17.09	178.07	38.2	10276.2	111.14	181.67	0.272918
19-12-8-67	257.4	51.5	56	48.4		273.05	1.46	6.91	5.13		51.5	1.46		153225	375.9	3.87	447143	<0.214	28.83	<0.181	<1.16	2.42	0.903	19.34	7.31	101.63	43.49	233.99	54.22	548.23	117.44	10096.9	244.47	455.93	0.403526
19-12-8-68	251	61.6	66.6	70		417.51	2.34	13.14	6.81		61.6	2.34		153225	371.38	11.99	453312	<0.223	11.88	<0.151	<1.17	2.53	0.533	16.73	6.03	78.63	31.21	159.55	33.8	331.23	68.02	9616.73	168.5	239.9	0.25046
19-12-8-69	637.6	514.7	537.6	551.4		48.55	5.99	8.77	11.61		514.7	5.99		153225	329.93	6.01	453629	<0.192	24.45	<0.227	1.16	2.57	0.714	18.72	7.64	103.9	43.96	239.16	57.09	583.83	128.28	11199.9	342.91	521.41	0.314701
19-12-8-70	0.1	51.9	50.1	55.8		285.46	1.4	6.94	5.16		51.9	1.4		153225	390.46	2.82	450837	<0.185	26.39	<0.175	<1.16	1.89	0.5	13.88	5.42	79.18	34.44	188.54	44.67	457.24	101.93	10646.2	225.43	495.08	0.298445
19-12-8-71	340.2	47.5	53.7	47.2		285.63	1.72	6.98	3.74		47.5	1.72		153225	227.79	10.61	465514	<0.186	14.45	0.253	3.98	7.64	0.806	32.62	10.03	116.77	41.44	189.42	36.67	322.88	60.33	11352.4	334.84	419.76	0.156087
19-12-8-72	207	51.2	54.6	56.8		223.54	1.24	5.36	3.8		51.2	1.24		153225	228.35	3.27	452954	<0.181	32.54	<0.180	<0.88	1.61	0.597	12.13	4.91	73.52	33.69	199.36	49.42	548.82	128.02	10555.4	301.82	601.81	0.413
19-12-8-73	0.1	52.6	51.5	58		137.44	0.87	2.86	2.68		52.6	0.87		153225	565.45	2.63	461015	<0.199	15.56	<0.154	1.76	4.05	1.19	25.27	8.89	110.01	41.17	201.33	45.28	469.29	99.81	10313.4	513.94	1260.54	0.359614
19-12-8-74	163.6	47.9	50.2	43.6		917.62	3.42	25.75	10.76		47.9	3.42		153225	165.57	3.51	456110	<0.217	35.93	<0.197	<1.39	1.75	0.583	9.44	3.3	40.75	16.44	83.17	18.23	182.22	38.74	9609.06	91.49	114.42	0.438514
19-12-8-75	236.8	85.3	90.7	109.7		448.26	4.26	18.99	16.31		85.3	4.26		153225	404.3	5.05	461644	<0.183	12.95	<0.184	<0.90	1.65	0.586	10.9	4.2	60.32	26.46	149.53	36.06	383.09	87.05	10298.7	117.58	262.88	0.422437
19-12-8-76	500.7	518.3	514.9	515.1		34.51	4.59	5.86	15.13		518.3	4.59		153225	114.64	5.84	465512	<0.239	9.02	<0.198	<1.11	1.15	0.165	6.11	2.07	25.43	9.69	47.32	10.42	101.26	20.61	10677.9	130.9	752.49	0.190298
19-12-8-77	326.3	18.9	21.5	19.5		438.31	0.84	4.62	1.83		18.9	0.84		153225	84.2	1.93	466824	<0.260	24.61	<0.143	<1.01	1.68	0.512	7.55	1.9	21.08	7.33	36.76	8.25	83.95	18.85	11245.6	578.97	714.83	0.439502
19-12-8-78	241	73.2	78.4	79		304.42	2.36	10.71	8.63		73.2	2.36		153225	228.52	3.41	456695	<0.219	16.87	<0.184	<1.19	0.97	0.436	7.11	2.99	39.19	16.75	91.36	21.8	236.16	56.17	11088.2	173.71	372.5	0.507558
19-12-8-79	285.3	47.8	52.7	46.3		361.16	1.64	8.93	4.93		47.8	1.64		153225	351.04	8.36	451758	<0.229	16.58	<0.181	1.2	3.05	0.713	18.25	6.76	87.48	35.85	186.9	42.51	410.36	88.36	9087.77	233.35	347.11	0.292165
19-12-8-80	688	756.7	739.1	756.4		57.09	9.25	13.47	27.82		756.7	9.25		153225	162.55	6.97	452588	<0.242	6.81	<0.185	1.15	2.76	<0.107	16.27	5.36	68.39	25.71	121.12	23.76	208.42	38.22	8177.05	58.55	173.5	n.a.
19-12-8-81	642.7	68.7	87.7	86.7		410.73	3.07	17.98	12.47		68.7	3.07		153225	283.74	4.74	448976	<0.161	11.82	<0.157	<1.11	1.25	0.611	9.53	3.62	49.11	21.77	120.47	28.7	311.68	72.87	9201.08	88.48	172.29	0.541202
19-12-8-82	250.5	68.1	73.4	73.4		532.25	3.54	19.08	11.06		68.1	3.54		153225	265.62	4.39	451266	<0.138	10.2	<0.143	<0.89	1.15	0.442	7.63	2.63	38.86	16.97	93.68	22.77	242.53	57.75	9374.22	107.56	182.73	0.456174
19-12-8-83	414.9	64.5	74.7	70.5		250.3	1.87	8.49	4.32		64.5	1.87		153225	541.21	5.61	441083	<0.207	25.1	<0.181	1.67	4.47	2.43	28.03	9.95	128.58	52.35	274.39	61.6	635.74	145.24	7383.09	292.28	358.8	0.663683
19-12-8-84	0.1	51.8	48.6	56.8		620.93	2.56	17.55	9.2		51.8	2.56		153225	315.59	11.12	437581	<0.198	9.09	<0.146	1.39	2.41	0.394	12.74	4.85	61.67	24.62	122.27	26.61	251.84	51.32	8533.39	102.83	178.59	0.217381
19-12-8-85	0.1	43.5	41.1	37.6		455.12	1.6	10.57	14.04		43.5	1.6		153225	58.96	<1.79	450714	<0.251	9.79	<0.212	<1.26	<0.45	<0.123	0.73	0.216	2.66	1.25	7.75	2.16	29.37	9.03	10166.2	76.71	335.76	n.a.
19-12-8-86	0.1	51.1	47.2	56.4		134.53	1.26	5.59	3.32		51.1	1.26		153225	314.04	3.24	474349	<0.171	29.77	<0.131	1.05	2.61	0.881	17.23	6.82	91.66	38.67	209.09	49.27	509.79	111.37	10430.9	277.41	500.41	0.401636
19-12-8-87	130.9	52.7	54.4	53.6		285.05	1.44	6.88	3.79		52.7	1.44		153225	267.06	3.17	440424	0.159	25.15	<0.163	1.05	2.14	0.79	14.87	5.44	74.75	31.85	176.88	42.16	452.09	102.97	10049.8	298.97	471.92	0.428138
19-12-8-88	142.2	50.9	52.9	49.6		175.57	1.02	3.95	1.76		50.9	1.02		153225	661.22	5.75	452261	<0.185	63	0.213	3.49	8.99	3.27	58.97	20.35	266.36	106.29	524.81	113.43	1086.61	221.44	9701.59	1019.55	923.68	0.434182
19-12-8-89	309.7	62.8	69.5	45.1		471.73	3.55	15.75	10.48		62.8	3.55		153225	488.81	4.4	449223	<0.207	14.03	<0.173	1.83	3.94	1.48	20.42	6.9	90.52	35.81	183.72	41.68	446.99	94.58	9414.07	163.81	215.43	0.504435
19-12-8-90	66.4	54.1	54.4	52		253.63	1.29	5.97	4.18		54.1	1.29		153225	401.83	4.95	451464	0.275	27.3	<0.167	1.15	1.99	0.528	14.9	5.47	80.12	34.99	194.31	46.38	493.43	108.56	10583.8	290.01	533.22	0.296438
19-12-8-91	368.2	197.2	210.9	208.2		43.78	1.96	3.42	4.44		197.2	1.96		153225	332.29	6.84	454402	0.194	15.15	0.189	<1.03	2.57	0.613	20.15	8.36	119.95	49.76	264.28	59.72	595.73	119.82	13190.7	704.29	1657.01	0.260421
19-12-8-92	0.1	66.8	62.4	72.3		451.42	2.8	16	9.86		66.8	2.8		153225	350.02	4.37	455009	<0.177	9.82	<0.213	<1.17	1.99	0.842	12.35	4.49	60.98	24.87	131.29	30.59	322.36	74.61	9979.45	109.17	186.12	0.519244
19-12-8-93	684.7	634.3	645.1	635.1		75.12	9.18	16.31	16.17		634.3	9.18		153225	570.94	10.95	445276	<0.165	13.14	0.398	5.97	10.33	1.74	43.94	11.59	115.64	34.6	140.24	25.41	205.93	36.63	9285.73	121.9	133.34	0.249683
19-12-8-94	110.7	50.3	51.5	49.7		201.38	1.08	4.45	2.35		50.3	1.08		153225	243.13	2.46	443228	<0.228	35.1	<0.186	<1.19	1.78	0.639	13.69	5.14	68.07	28.37	156.74	36.99	387.49	86.9	10131.4	651.74	782.69	0.395739
19-12-8-95	305	56.6	62.7	65.8		459.99	2.73	13.92	8.72		56.6	2.73		153225	747.25	7.35	439298	3.48	30.95	1.12	5.28	2.53	0.2	13.42	4.8	68.73	28.92	160.05	37.24	388.36	82.31	10532.9	284.32	424.32	0.104933
19-12-8-96	0.1	60.4	53.9	76.5		324.35	2.5	13.46	9.31		60.4	2.5		153225	312.49	3.36	447437	<0.230	16.95	<0.194	<1.27	1.61	0.584	11.97	4.64	67.58	28.74	158.02	37.4	394.38	88.53	9903.4	103.59	218.64	0.406698
19-12-8-97	0.1	56.9	55.2	77.4		634.45	3.12	17.48	10.99		56.9	3.12		153225	286.21	8.57	456269	<0.223	11.5	<0.166	<1.17	1.13	0.66	9.73	3.61	53.25	22.84	121.25	29.24	308.06	72.48	8958.17	113.23	198.54	0.60851
19-12-8-98	627.9	65.2	82.8	70		571.59	4.79	24.79	19.71		65.2	4.79		153225	251.26	4.95	442768	<0.282	8.61	<0.201	<1.41	1.04	0.376	7.12	2.66	37.23	16.37	91.59	22.85	248.07	60.36	8877.43	64.17	143.79	0.422426
19-12-8-99	1360.3	42.5	77.5	69.7		430.52	4.04	17.98	12.3		42.5	4.04		153225	251.66	31.49	408793	0.39	9.84	<0.193	<1.39	1.92	0.381	10.23	3.28	41.17	14.85	73.52	15.83	143.47	29.02	8716.81	193.12	233.15	0.262819
19-12-8-100	340.6	61.9	69.5	64.2		136.23	1.17	4.07	1.89		61.9	1.17		153225	504.81	6.18	439034	<0.153	35.19	0.195	3.6	7.56	0.815	46.63	16.04	195.81	74.23	353.78	72.88	660.79	126.95	8860.94	1029.06	772	0.132704
19-12-8-101	0.1	199.5	163.7	207.2		0	4.27	13.96	10.58		199.5	4.27		153225	197.85	4.38	444882	<0.164	9.01	<0.130	<0.90	1.05	0.518	6.3	2.28	30.16	12.83	72.83	18.07	197.96	47.57	9080.53	130.68	212.41	0.615721
19-12-8-102	118.7	49.6	51	51.7		220.13	0.95	4.89	1.68		49.6	0.95		153225	682	9.43	443454	<0.237	58.7	<0.274	2.16	7.18	3.15	51.51	17.82	230.36	90.19	455.42	98.81	962.31	198.38	8191.2	1129.02	948.55	0.500751
19-12-8-103	0.1	71.9	67.4	97.6		666.45	4.36	25.23	15.32		71.9	4.36		153225	462.63	3.85	448361	<0.217	15.5	<0.168	1.75	4.13	1.66	24.72	8.42	105.72	40.99	205.1	45.07	457.5	99.95	9796.64	201.65	235.24	0.50226
19-12-8-104	276.4	63.5	69.3	57.6		386.01	2.27	12.54	7.84		63.5	2.27		153225	370.31	3.69	453794	<0.194	14.37	<0.146	0.86	1.91	0.669	12.28	4.33	60.58	25.94	138.79	32.61	347.83	79.83	10123.2	157.72	267.58	0.422308
19-12-8-105	159.9	62.7	65.2	62.4		174.53	1.29	4.82	2.33		62.7	1.29		153225	801.85	7.46	449603	<0.175	50.15	0.373	5.97	11.47	5.16	59.73	19.92	248.83	97.35	490.73	111.14	1141.01	256.39	8343.24	662.1	631.34	0.602686
19-12-8-106	323.7	48.7	54.6	45.6		563.82	2.73	15.55	6.38		48.7	2.73		153225	255.73	16.07	466143	<0.160	11.58	<0.139	2.14	4.57	0.574	25	7.69	91	32.38	151.58	30.37	271.75	51.34	10350.1	152.21	163.58	0.164174
19-12-8-107	1127.8	46.4	75.2	48		661.6	4.28	29.43	8.3		46.4	4.28		153225	456.8	7.73	462110	<0.237	27.56	<0.229	2.25	4.87	1.91	26.31	8.69	110.07	45.06	228.14	49.98	499.1	107.35	8346.49	140.56	119.37	0.515855
19-12-8-108	26.2	89.8	87.5	102.3		1203.49	7.74	62.25	25.91		89.8	7.74		153225	192.88	8.71	464292	<0.208	13.98	<0.242	<1.09	1.64	0.416	8.44	3.11	35.57	13.39	63.96	13.61	129.76	25.33	9134.21	44.02	50.83	0.341837
19-12-8-109	866.4	40.4	58.1	78.6		53.73	0.49	1.36	3.12		40.4	0.49		153225	1499.6	12.02	416878	3.8	18.31	1.33	6.67	4.98	0.203	28.7	12.14	180.37	75.85	408.63	94.55	931.08	189.22	14496	420.86	3542.93	0.0519111
19-12-8-110	0.1	86.7	82.1	123.9		51.6	1.17	3.18	3.92		86.7	1.17		153225	469.74	6.17	460077	<0.162	6.25	0.149	1.77	4.07	<0.087	25.05	9.1	115.62	43	203.57	41.47	366.81	68.15	12060.5	437.75	1185.98	n.a.
19-12-8-111	2466	1215.1	1750.6	1316.6		24.19	13.15	10.59	35.72		2466	24.19		153225	303.58	3.85	442347	<0.203	14.51	<0.185	1.01	1.93	<0.115	10.3	3.79	50.06	19.43	99.11	21.61	208.4	39.49	8807.67	69.78	182.01	n.a.
19-12-8-112	0.1	50.5	43.4	44.6		20.43	1.35	6.39	3.12		50.5	1.35		153225	338.29	3.26	424369	<0.186	24.6	<0.214	<1.38	2.68	0.769	17	5.99	84.52	34.49	185.78	42.22	436.45	95.06	10578.9	263.85	422.09	0.3483
19-12-8-114	179.8	61.2	64.3	59.5		193.81	1.28	5.36	1.77		61.2	1.28		153225	430.29	6.23	442888	<0.156	28.99	<0.179	3.17	10.26	2.55	68	22.2	266.14	95.12	428.5	80.95	705.22	131.14	7691.97	1040.89	638.77	0.295142
19-12-8-115	0.1	50.9	47.9	55.9		260.77	1.49	7.64	3.1		50.9	1.49		153225	253.62	3.11	448215	<0.233	23.31	<0.173	<1.22	2.03	0.847	13.48	5	66.63	27.05	144.88	32.88	338.68	73.34	10406.5	403.53	417.25	0.495005
19-12-8-116	218.9	47.6	51.1	48		167.35	0.99	3.67	1.78		47.6	0.99		153225	420.54	4.52	445212	<0.211	46.54	<0.205	2.8	5.96	2.08	33.58	11.92	151.47	60.68	313.97	70.91	723.8	153.37	9633.9	936.42	835.61	0.449489
19-12-8-117	2680.9	2267.6	2492.9	2208.7		13.94	17.07	7.14	28.56		2680.9	13.94		153225	437.31	15.6	483910	0.206	20.76	0.65	8.65	14.05	0.855	72.04	20.99	231.47	78.82	340.99	63.41	539	93.97	9389.98	328.87	506.74	0.08216
19-12-8-118	80.6	14.9	15.3	14.4		420.76	0.63	3.01	1.15		14.9	0.63		153225	252.16	4.6	461282	<0.189	73.18	0.363	4.16	8.86	1.94	33.06	7.64	73.97	21.52	88.8	17.18	156.47	29.09	11073.8	1203.39	1088.04	0.34654
19-12-8-119	6.5	50.7	49.9	50		268.2	1.3	5.76	3.75		50.7	1.3		153225	242.17	3.35	443494	<0.158	25.75	<0.220	0.97	1.56	0.516	11.4	4.27	60.36	25.88	141.9	33.88	373.32	83	10395.5	311.15	518.2	0.374071
19-12-8-120	0.1	55.2	51.8	56.7		452.3	2.25	13.44	4.09		55.2	2.25		153225	521.15	8.18	444398	<0.174	31.06	0.338	5.28	9.17	2.71	52.94	16.79	205.95	75.39	365.94	75.89	729.3	143.88	8844.75	287.55	214.79	0.376021
19-12-8-121	230.3	122.9	128.4	128.2		461.83	3.57	27.73	11.18		122.9	3.57		153225	536.74	10.63	440361	<0.98	9.22	0.177	<5.93	3.78	<0.44	24.33	8.39	104.06	38.86	185.56	36.65	333.62	62.27	10557.4	238.46	297.81	n.a.
19-12-8-122	53.7	51.2	51.3	49.1		267.19	1.38	5.94	4.77		51.2	1.38		153225	391.62	2.36	444882	<0.139	15.73	<0.129	<0.69	1.19	0.443	9.71	3.64	54.4	23.29	136	33.78	379.01	86.69	10337.5	182.1	406.82	0.398419
19-12-8-123	21.6	114.3	110.3	117.8		130.34	1.81	5.7	5		114.3	1.81		153225	586.98	4.76	448979	0.177	36.95	0.179	2.21	4.6	1.09	32.22	11.44	158.01	63.95	333.95	74.75	743.81	151.34	11154.2	303.65	593.91	0.273719
19-12-8-124	159.5	117.5	119.5	137		1071.44	10.3	72.96	17.09		117.5	10.3		153225	348.42	26.44	456281	<0.217	24.32	<0.173	1.64	3.15	1.141	17.79	5.4	63.26	22.6	103.34	20.27	189.62	37.02	8500.25	64.45	38.2	0.465974
19-12-8-125	151.9	109.9	111.9	106.8		153.89	2	7.07	5.86		109.9	2		153225	218.12	3.97	454140	<0.222	10.02	<0.239	1.48	3.78	<0.130	22.8	7.53	99.11	36.47	169.81	33.84	310.57	59.42	9569.99	248.04	500.45	n.a.
19-12-8-126	286.9	109.5	117.7	107.5		102.73	1.7	4.91	3.9		109.5	1.7		153225	329.81	5.37	446448	<0.210	10.64	<0.163	1.86	4.77	<0.102	27.75	9.36	115.5	41.89	193.3	38.75	332.63	61.96	10169.3	396.06	665.53	n.a.
19-12-8-127	196.8	142.7	145.9	144.7		43.75	1.31	2.4	3.14		142.7	1.31		153225	625.42	11.14	415752	0.36	15.49	<0.202	1.39	2.3	0.544	19.49	8.88	131.46	55.49	293.38	66.28	650.93	129.31	10622.5	640.44	1730.07	0.248398
19-12-8-128	94.1	51.4	52.3	55		228.15	1.19	5.13	3.02		51.4	1.19		153225	380.3	4.3	458242	<0.250	37.86	<0.203	<1.10	2.62	0.918	20.62	8.25	117.03	49.35	268.05	61.83	634.16	136.18	10567.2	407.42	687.02	0.381827
19-12-8-129	154.3	53.5	55.8	67.1		264	1.35	6.52	2.67		53.5	1.35		153225	292.5	4.19	452768	<0.178	29.19	<0.199	<1.27	2.69	1.19	17.12	5.82	82.12	34.26	181.71	42.24	457.42	103.7	10264.9	617.62	529.63	0.536091
19-12-8-130	890.4	869.5	875.8	848.5		72.42	13.31	19.98	27.44		869.5	13.31		153225	127.02	5.71	463177	<0.256	5.17	<0.219	<1.05	0.61	0.323	2.97	1.13	15.72	6.66	35.8	8.08	88.16	19.85	8792.69	70.16	104.75	0.733633
19-12-8-131	549.8	494.2	504.4	507.4		141.95	9.56	26.22	16.55		494.2	9.56		153225	215.36	16.49	460762	<0.206	13.88	<0.216	1.44	3.36	0.382	18.76	5.75	67.03	22.93	103.07	19.84	178.7	32.55	9981	112.03	100.57	0.147095
19-12-8-132	442.9	494.5	485.7	467.4		85.09	7	14.5	19.95		494.5	7		153225	905.89	5.84	449870	<0.168	4.35	<0.163	1.35	3.81	0.479	28.18	10.61	146.39	57.76	280.91	57.35	530.3	103.52	10333.5	79.42	191.95	0.141326
19-12-8-133	1572.8	1558.5	1565.1	1582.7		27.46	14.79	11	33.08		1572.8	27.46		153225	197.26	5.55	450222	<0.193	6.28	<0.222	<1.66	1.31	0.509	7.17	2.22	28.86	11.4	59.63	13.44	137.12	29.54	8020.09	79.04	173.66	0.507741
19-12-8-134	314.9	58	64.6	57.2		444.71	2.71	13.81	7.71		58	2.71		153225	436.89	64.55	459591	<0.194	10.54	0.174	1.8	2.73	0.719	16.51	5.86	78.8	33.3	177.21	40.15	410.39	86.92	9216.19	123.81	190.57	0.327411
19-12-8-135	216.5	61.2	65.3	62.5		479.28	2.23	15.09	6.56		61.2	2.23		153225	377.43	5.43	442569	0.393	17.83	0.186	1.79	3.06	0.999	19.51	6.6	88.51	33.94	176.79	40.1	410.21	89.33	10287.6	188.44	239.18	0.395272
19-12-8-136	139.5	61.3	63.3	59.2		385.44	2.05	11.2	6.57		61.3	2.05		153225	416.56	3.32	446837	<0.162	20	<0.201	1.58	3.77	1.103	22.39	8.08	106.31	42.42	219.77	49.14	506.64	109.77	10422	183.64	295.35	0.367026
19-12-8-138	0.1	60.2	50.2	65.8		269.7	2.45	15.45	9.22		60.2	2.45		153225	376.35	3.5	444837	<0.167	13.3	<0.120	1.27	2.57	1.075	17.27	6.17	79.93	32.39	171.31	38.48	398.99	86.28	10228.2	119.43	211.03	0.493305
19-12-8-139	111.7	49.7	51	56.5		282.9	1.46	6.36	4.31		49.7	1.46		153225	295.18	2.61	451117	0.14	18.08	<0.129	0.85	2.35	0.814	14.49	5.44	73.12	30.34	162.12	38.72	418.09	92.34	10917.8	225.16	400.76	0.426457
19-12-8-140	351.6	42.7	48.6	47.7		227.68	1.13	4.99	2.34		42.7	1.13		153225	180.64	4.88	450074	<0.201	52.7	0.329	5.06	8.17	2.73	34.44	9.72	107.86	37.99	178.58	37.83	372.68	77.18	10156.9	512.75	518.85	0.497553
19-12-8-141	0.1	51.5	49.4	47.8		634.8	2.42	16.73	7.27		51.5	2.42		153225	252.43	13.04	438253	<0.192	9.23	<0.220	<1.59	2.89	0.471	16.07	5	55.21	20.32	97.94	19.61	181.36	36.14	9419	146.99	192.72	0.211292
19-12-8-142	0.1	49.9	44.7	48.2		219.01	1.71	8.8	7.43		49.9	1.71		153225	184.98	12.65	450289	<0.201	8.26	<0.129	1.42	2.74	0.404	14.89	4.47	54.95	19.96	94.42	19.11	174.11	34.55	10131.6	132.86	339.21	0.193365
19-12-8-143	361.5	47.1	53.8	49.2		252.19	1.29	6.18	2.28		47.1	1.29		153225	250.86	3.25	413030	<0.27	30.55	<0.241	<1.28	1.54	0.311	9.58	3.97	52.91	21.7	119.35	27.65	277.51	57.96	10771.5	251.88	287.28	0.247535
19-12-8-144	254.4	130.2	136.9	138.1		163.87	3.49	9.06	5.82		130.2	3.49		153225	372.28	12.15	437101	<0.231	22.77	<0.286	<2.26	4.86	0.193	26.62	8.7	110.05	40.52	193.41	38.84	343.33	63.77	10137.7	635.51	651.08	0.0518746
19-12-8-145	109.6	49.1	50.3	50.5		254.9	1.44	5.57	3.66		49.1	1.44		153225	238.56	2.37	457041	<0.189	26.76	<0.133	<0.99	1.49	0.555	12.2	4.73	63.9	27.18	152.57	37.17	385.34	85.22	10794.8	350.73	558.45	0.39796
19-12-8-146	0.1	55.4	47.3	53.1		58.44	1.66	8.15	5.45		55.4	1.66		153225	341.98	2.31	438183	<0.168	21.52	<0.150	<0.88	1.25	0.404	10.31	4.1	60.01	25.71	145.08	34.24	363.07	81.95	8700.51	175.77	355.05	0.344046
19-12-8-147	921.4	398.9	486.4	519.3		49.91	4.98	8.67	12.6		398.9	4.98		153225	667.04	6.23	405671	0.379	20.74	0.329	2.89	4.52	1.35	24.01	8.71	110.32	42.5	215.71	47.16	459.12	94.81	8276.42	270.39	517.48	0.396176
19-12-8-148	130.1	52.4	54.1	54		396.21	1.7	9.93	5.18		52.4	1.7		153225	473.58	7.77	425430	<0.182	30.78	<0.192	1.44	3.8	1.45	26.18	9.56	127.04	51.01	265.58	59.19	589.76	127.21	7511.59	222.64	334.13	0.444438
19-12-8-149	202.1	61.7	65.4	54.6		504.12	2.74	15.9	10.95		61.7	2.74		153225	314.13	5.32	437564	<0.224	13.67	<0.170	<1.02	1.32	0.605	9.19	3.58	48.99	21.18	119.91	29.21	318.82	75.55	7989.35	93.98	181.02	0.531044
19-12-8-150	19.4	61.8	60.8	98.1		828.31	4.59	26.22	21.91		61.8	4.59		153225	187.69	7.24	358041	<0.252	10.59	<0.202	<1.32	0.59	0.335	4.8	1.75	23.92	10.19	58.84	13.9	155.39	37.05	6753.51	105.47	196.43	0.60858
19-12-8-151	412.3	53.8	62.6	49.1		263.95	1.69	7.56	5.75		53.8	1.69		153225	339.49	2.55	434438	<0.148	20.11	<0.130	<0.86	1.36	0.493	10.01	3.99	58.01	25.44	141.68	34.74	373.91	84.79	8404.71	169.79	343.72	0.408489
19-12-8-152	0.1	53.2	47.5	52.6		257.87	1.77	10.37	6.44		53.2	1.77		153225	334.67	2.68	431410	<0.228	19.76	<0.201	<1.05	1.62	0.612	11.17	4.37	60.15	26.21	141.39	33.44	352.97	79.01	8412.65	178.8	346.08	0.439832
19-12-8-153	311	47.6	53.2	47.3		127.46	0.97	2.86	1.31		47.6	0.97		153225	1178.06	8.07	441557	<0.247	162.72	0.35	6.33	14.46	5.14	92.18	32.85	431.08	172.89	865.49	189.13	1870.27	378.99	6665.85	2608.83	1563.11	0.430408
19-12-8-154	196.2	63.7	67.3	67.7		814	5.53	29.21	23		63.7	5.53		153225	342.41	2.98	409372	<0.215	6.91	<0.274	<1.06	1.03	0.305	6.5	2.61	34.75	14.98	81.95	19.88	213.45	49.63	8385.8	47.19	110.61	0.360366
19-12-8-156	2891.9	114.8	422.8	312.4		174.25	6.95	33.83	27.71		114.8	6.95		153225	445.48	21.28	421292	2.47	13.55	1.23	5.77	2.49	0.497	9.74	3.5	48	20.63	109.53	25.23	255.31	54.82	8237.42	51.67	85.26	0.308529
19-12-8-157	809.8	750.7	766.1	702.3		309.88	29.63	86.26	86.25		750.7	29.63		153225	117.89	12.77	438343	<0.203	2.89	<0.146	<1.09	2.23	0.3	9.9	3.51	42.73	15.55	73.86	14.83	135.44	26.46	5967.2	13.35	18.94	0.195196
19-12-8-158	546.6	57.7	71.1	69		229.31	2.09	7.36	5.24		57.7	2.09		153225	302.06	5.78	375495	<0.176	19.04	<0.154	<0.90	1.2	0.48	9.64	3.54	49.65	21.49	116.55	28.27	308.73	70.65	7628.8	212.97	303.73	0.431451
19-12-8-159	343.8	59.7	67.3	62		289.21	1.83	8.91	3.22		59.7	1.83		153225	420.48	3.73	446272	<0.184	23.21	<0.161	1.86	3.97	1.37	24.54	8.25	107.72	42.45	208.18	45.65	452.52	96.46	9074.69	317.93	262.81	0.424334
19-12-8-160	657.2	130.6	162.6	134.3		168.08	2.84	12.04	5.27		130.6	2.84		153225	296.68	8.31	425379	3.62	28.75	1.27	9.09	8.48	0.349	37.65	11.54	130.92	46.31	203.09	38.44	327.7	60.06	8070.52	381.02	328.28	0.0597124
19-12-8-161	337.5	50.7	57.2	55.5		351.03	1.66	9.46	5.11		50.7	1.66		153225	217.02	4.1	437539	0.268	20.15	<0.215	<1.10	1.15	0.46	8.94	3.35	46.34	20.33	114.3	27.5	294.12	66.88	9057.38	236.02	371.48	0.438591
19-12-8-162	210.1	48.7	52.1	50.7		318.18	1.48	7.56	3.68		48.7	1.48		153225	308.11	3.16	444803	<0.235	40.12	<0.219	<1.05	1.87	0.34	13.2	4.92	65.44	27.61	155.32	36.86	386.71	83.69	9484.29	348.83	447.02	0.209214
19-12-8-163	1328.6	62.6	110.6	84.1		321.86	3.04	18.76	11.46		62.6	3.04		153225	391.08	5.54	434743	<0.275	10.47	<0.209	<1.08	1.77	0.659	11.11	4.02	55.9	23.19	124.06	29.99	315.81	72.3	8626.72	97.32	172.85	0.454319
19-12-8-164	1085.6	1010.4	1034.9	1020		63.46	15.97	19.69	23.48		1085.6	63.46		153225	262.45	14.04	458213	<0.199	17.78	0.251	2.01	3.27	0.228	14.32	4.41	48.07	16.67	77.31	14.82	129.43	23.83	9405.08	153.34	115.61	0.101861
19-12-8-165	1937.7	59.9	144.6	106.3		313	3.72	24.93	11.95		59.9	3.72		153225	227.97	4.11	438272	<0.235	7.94	<0.196	<1.23	2.33	0.923	10.9	3.8	49.16	18.62	95.74	22.26	232.66	53.87	8748.68	92.35	130.15	0.559925
19-12-8-166	542.7	46	56.9	48.4		324.18	2.26	8.7	5.74		46	2.26		153225	284.35	3.03	457650	<0.188	19.42	<0.214	<1.40	2	0.252	12.8	5.04	64.91	26.33	138.18	29.59	296.73	60.09	9554.74	269.61	425.94	0.152265
19-12-8-167	621.3	48.2	61.7	46.8		243.44	1.67	7.02	3.6		48.2	1.67		153225	366.78	7.02	450808	0.309	19.6	<0.179	<1.25	3.77	0.607	22.28	7.68	100.94	40.31	204.63	44.46	428.69	88.17	9373.48	438.1	512.59	0.202479
19-12-8-168	37	57.5	57.1	55.3		400.87	1.93	10.38	4.86		57.5	1.93		153225	365.5	2.77	432217	<0.159	10.97	<0.149	1.59	4.49	0.577	30.68	10.77	136.76	52.82	254.23	51.07	478.24	91.6	8570.12	229.55	314.53	0.150295
19-12-8-169	0.1	49.9	48.4	49.3		605.44	2.18	14.88	3.34		49.9	2.18		153225	490.66	10.35	431846	1.5	92.33	1.2	14.9	20.6	6.61	81.61	21.96	231.77	74.94	326.13	63.62	555.81	104.36	6637.04	394.49	232.66	0.492851
19-12-8-170	339.5	62.4	70.1	60		83.59	0.9	2.41	1.52		62.4	0.9		153225	1156.71	7.55	426134	0.475	70.78	0.304	2.16	6.84	1.51	59.53	23.49	325.94	132.02	662.58	141.45	1355.18	270.95	10226.8	1768.19	1810.67	0.228771
19-12-8-171	771.7	719.9	733	848.8		49.15	8.28	11.54	13.42		719.9	8.28		153225	254.48	5.28	440819	<0.180	44.27	0.43	6.09	8.1	1.83	29.58	8.29	86.5	28.24	122.49	24.41	217.48	41.11	7865.09	289.77	247.29	0.361434
19-12-8-172	128.9	53.4	55.1	57.4		264.99	1.33	6.43	2.72		53.4	1.33		153225	489.63	4.6	442457	<0.244	42.92	<0.176	<1.41	3.52	1.39	23.05	9.07	125.38	54.08	293.79	68.31	716.3	157.41	8651.18	574.88	619.54	0.471767
19-12-8-173	278.3	60.8	66.6	63.8		360.32	2.08	11.17	8.7		60.8	2.08		153225	345.96	7.1	419483	0.188	17.83	<0.203	<1.72	1.78	0.744	12.62	4.75	69.84	30.72	171.31	40.05	424.18	100.7	8827.44	143.6	296.76	0.479902
19-12-8-174	139.4	61	63	58.9		582.74	2.82	18.04	10.63		61	2.82		153225	315.63	6.81	445718	<0.258	12.63	<0.227	<1.44	1.85	0.804	12.67	4.73	64.96	26.94	145.77	33.78	358.43	82.38	8354.61	127.73	202.2	0.507693
19-12-8-175	99.1	59.1	60.1	58.8		284.19	1.54	7.49	2.49		59.1	1.54		153225	746.68	8.88	437668	0.293	55.4	0.88	12.15	21.4	8.09	98.36	28.31	316.07	106.17	472.37	98.19	940.62	193.28	7331.51	690.11	474.07	0.539078
19-12-8-176	305.9	63	69.7	57.6		451.97	2.79	15.16	11.53		63	2.79		153225	268.85	4.77	489735	<0.131	9.09	<0.125	<0.77	1.15	0.474	7.45	2.88	40	17.08	92.12	23.82	260.02	60.18	9381	63.33	138.95	0.495075
19-12-8-177	233.6	134.7	140.2	149		229.46	3.44	13.68	7.97		134.7	3.44		153225	459.15	4.95	448199	<0.174	18.18	<0.132	1.31	2.78	1.02	18.33	6.69	91.24	38.96	210.85	47.95	487.61	107.64	8338.51	177.77	219.72	0.436834
19-12-8-178	430.8	47.4	55.7	47.6		415.84	2.5	11.21	4.01		47.4	2.5		153225	423.96	17.65	472018	<0.191	19.06	0.201	3.08	6.26	0.673	31.74	10.2	127.6	46.26	214.38	45.72	418.88	79.27	9325.62	513.18	328.98	0.145963
19-12-8-179	20.8	110.9	107.1	141.7		399.24	3.53	18.89	9.84		110.9	3.53		153225	862.39	7.9	476605	<0.235	20.61	0.232	2.67	5.79	1.38	34.25	12.33	156.8	61.53	312.59	66.78	651.98	131.58	9392.13	176.32	221.21	0.299591
19-12-8-180	43.7	61.8	61.4	64.3		506.77	2.3	14.64	8.43		61.8	2.3		153225	486.33	5.52	430495	<0.235	15.61	<0.185	2.52	4.16	1.68	23.56	7.28	90.3	36.04	183.15	41.13	436.94	98.4	8770.67	162.68	260.93	0.518793
19-12-8-181	38.6	60.6	60.1	88.1		701.29	3.28	21.16	12.19		60.6	3.28		153225	321.92	3.44	454336	<0.258	10.47	<0.227	<1.66	2.5	0.858	11.78	4.07	55.22	22.1	120.23	28.84	304.05	69.82	9328.3	87.39	166.75	0.483353
19-12-8-182	265.1	51.2	56	47.4		765.78	3.77	23.01	11.45		51.2	3.77		153225	283.96	15.99	441940	<0.50	11.75	<0.47	<1.73	2.19	0.26	10.36	3.72	47.07	18.67	96.11	20.94	206.43	42.67	8990.78	151.67	234.61	0.166875
19-12-8-183	253.1	46	50.2	45.7		326.58	1.32	7.59	3.53		46	1.32		153225	444.21	2.9	431672	<0.28	20.94	<0.245	<1.57	2.55	0.19	16.2	5.97	87.19	36.3	191.43	42.98	423.46	91.81	10514.7	255.31	436.91	0.0903744
19-12-8-184	149	61.4	63.7	59.1		514.9	2.5	15.78	10.84		61.4	2.5		153225	376.56	3.61	453654	<0.239	15.64	<0.179	<2.00	2.03	0.746	14.08	5.33	73.35	30.25	167.23	39.78	422.73	97.76	9386.25	114.08	231.11	0.426588
19-12-8-185	0.1	51.4	46.2	58.3		226.46	1.47	9.02	6.2		51.4	1.47		153225	747.69	2.36	443326	<0.39	19.33	<0.33	<1.65	3.05	0.582	19.85	8.39	119.36	50.61	268.59	61.22	617	130.07	10063.1	238.05	582.3	0.228672
19-12-8-186	231.8	67.6	72.4	73.3		552.73	2.96	19.74	5.47		67.6	2.96		153225	389.74	10.99	460796	<0.225	19.54	0.339	5.4	8.16	2.43	37.73	11.61	139.46	52.14	245.61	49.81	469.33	92.9	7305.76	288.85	236.72	0.423387
19-12-8-187	0.1	19.1	16.2	17.5		46.13	0.52	3.12	0.83		19.1	0.52		153225	117.21	3.81	444507	<0.210	99.78	0.293	4.69	7.45	2.21	28.94	6.94	74.17	25.42	117.12	24.14	232.82	49.88	9759.48	2124.48	1462.42	0.460134
19-12-8-188	314.8	107.5	117.1	124.2		222.17	3.4	11.12	8.74		107.5	3.4		153225	178.61	19.28	429315	<0.290	5.72	<0.209	2.38	4.29	1.2	22.62	7.36	91.54	35.11	177.65	39.78	389.89	79.24	7313.22	380.46	519.1	0.372414
19-12-8-189	1555.1	1228.9	1353.5	1222.3		49.09	17	18.71	25.81		1555.1	49.09		153225	401.44	15.58	441995	<0.209	14.53	<0.221	<1.37	3.05	0.431	14.18	4.72	49.63	17.32	78.49	15.22	131.4	25.82	9680.89	127.22	103.07	0.200359
19-12-8-190	0.1	19.6	16.5	19		0	0.33	1.45	1.06		19.6	0.33		153225	128.62	1.85	435097	<0.249	36.97	<0.210	<1.42	2.2	0.603	12.62	3.96	49.69	20.07	109.82	26.43	292.71	68.75	11497	1568.01	3305.14	0.349861
19-12-8-191	1441.2	1428.7	1434.3	1370.7		22.02	11.7	8.12	15.78		1441.2	22.02		153225	511.6	8.71	439187	<0.252	23.81	0.452	6.56	11.71	1.63	67.5	21.69	253.26	87.98	394.13	74.78	634.09	114.58	8879.07	388.38	348.78	0.177246
19-12-8-192	0.1	11.9	11.3	9.8		221.83	0.31	1.73	4.16		11.9	0.31		153225	133.12	<1.63	437494	<0.278	7.87	<0.219	<1.31	0.52	0.158	5.6	2.57	43.37	21.78	133.2	32.21	327.73	69.22	11977.4	326.57	2582.98	0.283062
19-12-8-193	393	465.2	453.5	469.6		286.66	15.63	50.01	20.56		465.2	15.63		153225	344.08	26	449449	<0.236	7.73	0.64	9.62	11.96	1.31	42.61	10.41	100.62	29.87	117.07	20.86	168.74	30.61	8914.33	89.33	45.8	0.177406
19-12-8-194	67.9	47.2	47.7	51.4		1201.86	4.28	34.79	10.31		47.2	4.28		153225	174.78	16.83	442674	<0.264	10.24	<0.206	1.25	1.89	0.253	9.86	3.06	37.17	13.64	68.66	14.19	141.98	27.87	8631.72	135.43	119.84	0.179172
19-12-8-195	307.3	52.9	58.9	64.5		425.38	2.22	12	7.1		52.9	2.22		153225	212.34	3.32	400614	<0.35	15.39	<0.270	<1.52	1.52	0.234	7.65	2.98	41.27	17.4	90.01	21.14	203.58	45.13	9699.04	287.55	495.33	0.209789
19-12-8-196	775.9	49.8	68.3	57.1		324.82	2.07	11.02	7.51		49.8	2.07		153225	204.05	3.08	444014	<0.237	21.12	<0.225	<1.08	1.41	0.403	9.82	3.67	53.42	23.4	134.27	33.64	362.2	83.39	9332.4	184.8	359.31	0.3311
19-12-8-197	1509.9	51.5	100.6	66.1		142.74	1.34	7.2	2.99		51.5	1.34		153225	34572.4	8.89	444043	157.44	419.63	40.77	160.71	30.37	5.83	57.26	15.72	191.42	76.91	394.65	88.41	913.6	201.12	7718.38	693.46	730.11	0.427405
19-12-8-198	1295.7	1190.9	1229.2	1161		45.11	16.44	15.51	29.73		1295.7	45.11		153225	242.02	6.35	489988	<0.17	19.3	0.45	7.95	13.09	0.357	57.25	16.88	202.58	69.49	303.65	57.94	469.73	84.87	8469.32	257.2	333.02	0.0398685
19-12-8-199	225.2	55	59.1	58.9		446.86	2.36	12.55	8.1		55	2.36		153225	215.53	3.43	424117	<0.281	20.31	<0.185	<1.56	1.4	0.466	9.61	3.5	51.1	22.34	125.53	30.89	339.15	78.79	9227.14	208.66	359.41	0.3884
19-12-8-200	0.1	52.7	45.4	58.9		179.82	1.69	10.11	6.21		52.7	1.69		153225	216.99	3.12	445187	<0.236	20.2	<0.180	<1.29	1.13	0.511	9.2	3.37	47.6	20.51	117.02	28.33	313.67	72.33	9489.11	235.85	419.06	0.484515
19-12-8-201	1177.9	1216.2	1202.9	1317.3		33.13	12.14	11.07	25.08		1177.9	33.13		153225	240.13	4.71	442833	<0.164	19.83	0.164	2.44	3.05	1.01	15.17	4.83	58.57	21.19	99.63	20.23	188.52	36.6	10022.3	129.86	225.73	0.45394
19-12-8-202	88.2	85.7	85.9	80.7		756.38	5.23	33.09	19.77		85.7	5.23		153225	174.04	7.39	450362	<0.181	9.07	<0.251	<0.99	1.25	0.48	6.59	2.09	24.89	9.78	49.42	10.98	115.36	24.98	8215.56	65.83	114.95	0.511285
19-12-8-203	325.2	51.3	57.6	53.7		168.67	1.16	4.22	1.58		51.3	1.16		153225	265.54	6.04	406567	0.229	42.27	<0.203	<1.61	3.1	0.97	16.81	6.05	78.47	31.83	169.58	38.72	401.51	89.15	8643.46	1787.49	1066.48	0.410796
19-12-8-204	0.1	51	49.7	48.7		197.2	1.05	4.47	1.89		51	1.05		153225	286.7	5.92	439355	<0.278	47.25	<0.212	<1.43	3.41	1.87	23.21	7.82	98.7	39.69	206.18	47.65	493.73	111.52	7927.04	1074.84	932.77	0.642608
19-12-8-205	3155.3	50.8	241	87.6		369.58	7.31	48.17	16.58		50.8	7.31		153225	279.66	19.79	376792	<0.192	12.29	<0.247	2.86	6.12	2.96	28.72	8.37	92.02	31.02	140.68	27.33	240.01	47.86	6058.49	86.8	72.99	0.682564
19-12-8-206	378.8	57.7	66	63.8		273.91	2.03	8.2	4.48		57.7	2.03		153225	381.64	3.08	470350	<0.193	20.73	<0.198	2.67	5.4	0.73	32.57	11.79	153.23	59.42	297.73	63.65	607.22	121.02	9278.2	508.06	621.56	0.168282
19-12-8-207	475.1	445.1	450.4	472.4		85.56	6.05	13.74	12.37		445.1	6.05		153225	418.85	4.1	452887	<0.190	21.18	0.172	2.54	5.69	1.08	30.59	10.55	134.35	50.79	238.43	49.29	454.69	86.41	9200.12	255.05	336.17	0.250263
19-12-8-208	334.4	65.8	73.6	60.8		380.63	2.95	13.1	4.75		65.8	2.95		153225	725.13	4.85	437538	<0.177	28.58	0.28	4.28	7.56	3.13	43.03	13.47	174.67	66.56	336.49	73.99	734	155.15	8791.88	287.09	271.35	0.530539
19-12-8-209	906.9	904.3	905.5	907.7		29.55	7.91	7.92	16.29		904.3	7.91		153225	600.58	4.21	437660	<0.204	5.7	<0.183	<0.98	3.54	<0.109	23.23	8.53	106.76	39.51	184.04	36.73	325.79	59.36	10583.1	205.29	459.3	n.a.
19-12-8-210	1297.2	55.7	97.5	63.2		167.75	1.54	8.11	3.01		55.7	1.54		153225	9374.78	11.34	433467	80.97	196.99	18.54	71.03	17.16	3.65	48.84	14.61	170.93	63.26	313.65	66.5	635.87	131.53	7860.78	684.38	544.02	0.385448
19-12-8-211	1780.6	69.2	152.5	43.1		348.13	4.27	29.23	25.11		69.2	4.27		153225	251.68	6.53	394223	<0.272	7.41	<0.240	<1.38	0.95	0.274	6.88	2.51	34.68	14.98	81.28	19.49	212.17	49.8	8859.66	45.5	105.42	0.327653
19-12-8-212	203.3	46.4	49.6	48.2		157.72	0.91	3.34	1.37		46.4	0.91		153225	745.29	6.31	443018	3.52	106.78	0.73	5.25	9.63	1.75	53.7	17.9	224.75	84.1	419.5	88.2	833.18	161.15	8962.66	1904.75	1249.52	0.235265
19-12-8-213	348.7	131.7	143.9	131.9		201.14	3.3	12.3	8.34		131.7	3.3		153225	206.62	2.31	439814	<0.212	10.8	<0.172	<1.25	1.08	0.262	8.22	3.13	40.36	16.64	92.7	21.72	231.97	50.66	10168.7	407.8	464.3	0.268827
19-12-8-214	0.1	84.7	80.2	84.6		209.99	2.03	8.85	5.29		84.7	2.03		153225	95.03	2.5	447266	<0.237	24.23	<0.185	<1.11	0.93	0.433	6.89	2.18	30.2	12.97	73.95	18.87	218.62	54.66	9604.99	296.58	453.86	0.522945
19-12-8-215	194.1	126.9	130.4	124.7		96.85	1.83	5.01	2.63		126.9	1.83		153225	759.2	7.01	402716	2.86	36.53	1.79	15.1	21.05	2.07	106.48	33.66	400.01	140.19	620.34	115.86	971.8	174.91	8088.94	1218.68	857.95	0.133669
19-12-8-216	438.4	461	457.6	461.8		34.09	4.07	5.25	5.65		461	4.07		153225	690.39	8.88	435015	<0.153	34.64	0.194	3.26	7.9	0.391	50.55	18.35	238.15	87.59	406.99	79.76	696.62	123.3	9301.93	1038.8	949.91	0.0598167
19-12-8-217	296.5	49.5	54.9	50.7		292.01	1.58	7.31	4.87		49.5	1.58		153225	294.42	3.21	438940	<0.186	30.36	<0.212	<1.31	1.87	0.641	14.05	5.8	80.89	34.66	193.78	45.74	487.71	109.83	9719.96	312.24	542.1	0.382313
19-12-8-218	362.1	32.6	37.6	35		137.9	0.72	2.23	1.63		32.6	0.72		153225	214.49	3.68	432796	0.3	55.91	<0.240	1.83	3.96	0.76	20.95	6.92	84.68	32.47	164.45	35.56	346.89	71.85	10088.9	1313.92	1849.12	0.25509
19-12-8-219	0.1	50.3	48.4	48.6		155.3	0.98	4.02	1.48		50.3	0.98		153225	594.67	7.32	431114	0.81	130.52	0.285	3.83	9.51	4.07	60.79	21.06	276.71	111.4	571.41	127.77	1280.04	263.01	7817.43	1479.55	1076.68	0.517497
19-12-8-220	0.1	69.7	64.9	63		760.46	3.96	29.28	19.5		69.7	3.96		153225	248.68	4.35	445599	<0.216	8.04	<0.222	<1.09	1.09	0.457	6.65	2.27	31.39	12.97	69.23	16.6	184.15	43.64	9344.24	68.92	149.1	0.518933
19-12-8-221	211.9	20.2	21.9	99		2435	6.39	55.16	1432.44		20.2	6.39		153225	52.61	2.09	450724	<0.211	<0.246	<0.279	<1.04	<0.50	<0.152	1.45	0.87	14.45	5.79	24.8	4.52	36.23	7.85	14998.6	1.23	89.37	n.a.
19-12-8-222	519.4	522.3	522.1	585.8		308.77	19.92	61.87	57.12		522.3	19.92		153225	142.71	2.98	451909	<0.245	2.87	<0.231	<1.39	0.78	0.429	5.46	2.08	26.31	10.73	55.39	12.34	120.31	26.22	8035.04	33.67	56.87	0.635526
19-12-8-223	502.5	489.4	492.1	481		170.13	11.44	30.73	23.75		489.4	11.44		153225	193.72	11.92	452600	<0.237	12.95	<0.233	1.32	1.88	0.142	9.17	2.83	34.8	12.53	57.62	11.75	107.65	20.55	10423.5	88.97	102.39	0.104555
19-12-8-224	825.3	52.5	73.6	52.8		735.36	4.37	31.51	10.03		52.5	4.37		153225	225.54	10.69	455097	0.158	23.06	<0.179	<1.28	2.9	1.07	14.29	4.03	44.48	14.95	65.73	13.15	119.53	24.89	7443.98	110.5	100.76	0.508146
19-12-8-225	0.1	51.4	43.9	50.1		145.27	1.69	9.43	5.19		51.4	1.69		153225	246.49	4.57	453296	0.365	25.39	<0.151	0.98	1.81	0.556	12.59	4.8	67.77	28.46	160.81	38.21	421.07	94.62	10212.8	290.34	492.69	0.356076
19-12-8-226	272.1	47.4	52.1	54.8		401.5	1.7	9.94	4.78		47.4	1.7		153225	276.28	4.83	450804	<0.30	19.95	<0.198	<1.45	2.15	0.525	12.67	4.24	58.89	24	126.53	28.96	300.91	64.06	9871.25	296.14	394.99	0.307518
19-12-8-227	0.1	43.7	34.1	47.3		120.14	2.22	10.97	5.44		43.7	2.22		153225	430.43	8.48	450290	<0.216	20.72	<0.211	<1.10	2.31	0.238	14.49	5.75	79.95	31.8	160.88	36.21	350.72	69.5	9576.61	270.05	312.23	0.125764
19-12-8-228	0.1	63.4	60.6	60.1		582.48	2.79	18.56	8.43		63.4	2.79		153225	382.22	4.23	448425	<0.209	15.28	<0.240	1.22	1.9	0.79	14.43	4.77	64.81	26.34	143.52	32.93	344.68	78.3	9489.61	168.67	228.9	0.46125
19-12-8-229	239.1	49.5	53.6	49.4		490.18	2.62	12.69	4.39		49.5	2.62		153225	270.57	5.41	413310	<0.238	70.05	<0.25	3.38	5.65	1.92	28.43	9.42	112.43	42.34	209.53	44.99	434.28	89.49	8202.43	565.61	432.09	0.463135
19-12-8-230	0.1	54	52.2	45.1		411.01	1.98	10.52	7.91		54	1.98		153225	309.34	<1.99	406480	<0.32	28.02	<0.213	<1.51	1.62	0.54	12.19	4.92	73.11	31.22	168.23	39.33	405.36	89.32	9509.39	208.07	446.75	0.371496
19-12-8-231	323.6	64.3	71.7	48.6		704.51	4.11	26.66	23.37		64.3	4.11		153225	295.05	3.03	440866	<0.238	11.94	<0.203	<1.53	1.15	0.547	10.4	3.76	54.06	23.06	125.79	30.09	327.05	74.04	9747	89.51	177.37	0.48355
19-12-8-232	630.7	53.1	68	49		266.86	2.01	8.54	6.94		53.1	2.01		153225	309.52	2.86	446142	<0.169	33.42	<0.183	<1.34	1.81	0.629	14.85	6.06	87.8	38.01	207.72	47.65	508.79	110.99	10201	339.18	631.01	0.370909
19-12-8-233	348.4	62.2	70.2	57.9		162.12	1.21	4.97	3.03		62.2	1.21		153225	367.54	2.39	444038	<0.247	15.04	<0.165	1.54	4.03	0.541	27.63	10.17	137.08	52.93	262.31	54.81	509.5	96.85	9995.63	596.05	860.2	0.156738
19-12-8-234	1400.8	1131.1	1227.9	1620.1		19.94	8.71	6.63	16.88		1400.8	19.94		153225	421.55	9.1	449248	<0.243	53.72	<0.30	2.71	4.74	1.13	23.01	7.79	95.93	34.59	167.18	34.57	314.78	61.01	11160.7	499.32	669.49	0.330789
19-12-8-236	224.7	59.4	63.7	61.3		210.43	1.34	5.86	1.78		59.4	1.34		153225	1311.23	18.9	445382	<0.268	76.17	0.52	11.45	22.31	10.39	126.39	41.07	516.94	191.18	908.53	187.71	1801.54	363.96	7544.64	1304.3	739.96	0.598176
19-12-8-237	304.9	57.8	64.2	60.5		537.01	3.37	17.04	5.08		57.8	3.37		153225	354.89	20.47	445831	0.348	21.95	0.422	7.94	11.24	1.58	54.11	15.83	184.64	64.47	293.08	56.2	490.44	92.27	8702.81	366.75	233.31	0.195864
19-12-8-238	0.1	60.5	54.5	53		372.35	2.31	14.47	7.92		60.5	2.31		153225	361.72	4.75	456993	<0.230	17.43	<0.195	1.52	2.79	1.16	18.37	6.4	86.79	36.26	193.4	45.57	484.22	108.48	10256.6	187.91	292.69	0.49536
19-12-8-239	0.1	63.8	52.6	60		52.28	2.02	10.88	6.02		63.8	2.02		153225	467.02	5.01	452216	0.269	26.17	<0.211	1.36	2.61	1	19.11	7.69	106.8	44.85	241.4	55.3	583.87	126.07	10486.4	234.7	366.73	0.432881
19-12-8-240	400.1	49	56.8	53.6		246.29	1.62	6.32	3.63		49	1.62		153225	239.37	70.51	490358	<0.142	36.57	<0.166	2.11	5.12	1.44	25.79	8.33	108.29	42.1	216.92	49.67	523.17	109.49	10962.4	568.49	714.22	0.383108
19-12-8-241	549	515	519.7	552.8		117.55	10.68	21.59	21.88		515	10.68		153225	215.03	8.38	438490	<0.211	24.37	<0.152	<1.34	1.78	0.344	9.52	3.27	42.31	16.08	82.98	18.23	179.96	34.49	10708.3	170.94	225.22	0.255476
19-12-8-242	0.1	64.4	52.8	52.4		358.96	3.02	19.74	10.6		64.4	3.02		153225	375.51	6.63	442604	<0.285	11.52	<0.252	1.17	2.23	1.043	13.33	5.02	64.08	27.09	145.89	34.34	370.27	87.35	8359.07	125.62	205.49	0.584839
19-12-8-243	234.4	85.7	90.7	89.4		129.87	1.48	4.89	8.27		85.7	1.48		153225	210.5	3.58	432317	<0.286	15.33	<0.217	<1.35	0.84	<0.126	6.04	2.48	33.26	14.2	78.32	18.7	195.16	40.37	12984.5	178.85	851.72	n.a.
19-12-8-244	493.8	50	60.2	49.7		219.1	1.32	6.03	3.54		50	1.32		153225	224.55	<1.80	440779	<0.289	23.72	<0.206	<1.24	1.39	0.498	8.7	3.55	49.42	20.76	113.22	27.41	292.8	64.37	10162.2	404.89	598.12	0.437806
19-12-8-245	0.1	66.3	58.7	66.1		0	1.23	4.44	3.1		66.3	1.23		153225	598.3	2.61	430903	<0.279	38.53	<0.220	<1.45	3.37	1.061	25.14	9.93	135.32	55.32	286.67	63.62	641.27	128.73	10826.1	503.85	913.51	0.352401
19-12-8-246	448.9	53.4	62.9	57.3		258.5	2.05	7.35	6.1		53.4	2.05		153225	270.06	1.46	460761	<0.239	15.15	<0.228	<0.99	2.06	0.278	12.96	5.44	79.91	33.81	179.06	40.67	411.69	82.03	10374.7	305.63	581.04	0.164486
19-12-8-247	694.5	710.2	704.5	1127.8		232.23	21.71	58.18	265.95		710.2	21.71		153225	84.11	1.78	434925	<0.199	1.28	<0.192	<1.11	<0.48	<0.114	1.97	0.47	6.15	2.77	16.79	4.98	69.9	21.56	10850.4	4.65	47.6	n.a.
19-12-8-248	384.2	61	69.5	46.3		492.26	2.62	17.01	10.44		61	2.62		153225	317.63	4.94	436651	<0.179	11.94	<0.245	<1.24	1.19	0.431	9.03	3.41	47.04	21.23	115.45	28.39	312.97	69.91	9740.69	116.72	223.9	0.401957
19-12-8-249	0.1	19.3	17.1	28.9		751.64	1.22	9.42	3.3		19.3	1.22		153225	86.02	1.9	436067	<0.258	16.35	<0.198	<1.19	0.88	0.222	3.52	0.96	11.14	4.52	22.79	5.58	58.98	13.46	11764.5	387.9	445.42	0.38562
19-12-8-250	0.1	64	57.8	57.1		224.03	1.9	10.21	6.03		64	1.9		153225	240.87	3.34	442508	<0.192	11.64	<0.227	<1.28	1.95	0.424	13.24	5.13	69.19	29.5	154.58	35.18	346.88	69.87	9919.07	257.91	411.49	0.255108
19-12-8-251	421.5	51.7	60.2	49.6		415.38	2.41	12.14	10.42		51.7	2.41		153225	296.52	2.86	441182	<0.275	16.26	<0.223	<1.26	1.67	0.405	10.13	4.01	57.04	25.62	144.57	35.87	383.71	84.24	10865.7	146.48	366.49	0.301031
19-12-8-252	0.1	83.4	75.3	81.3		67.75	1.85	7.19	4.26		83.4	1.85		153225	121.36	2.33	440850	<0.260	25.07	<0.218	<1.10	1.14	0.62	8.12	2.82	36.38	15.06	82.75	20.73	221.57	49.74	10551.9	417.15	594.81	0.622989
19-12-8-253	360	52.9	59.9	48.4		362.1	1.77	10.3	6.36		52.9	1.77		153225	213.19	3.13	440268	<0.251	23.02	<0.213	<1.17	1.15	0.497	10.12	4.21	57.55	23.84	131.3	30.44	322.7	66.15	10455.2	246.38	395.15	0.445386
19-12-8-254	77.5	53.6	53.9	57.2		345.59	1.57	8.37	4.05		53.6	1.57		153225	377.27	3.57	430408	0.209	31.15	<0.225	2.2	4.63	0.726	25.39	9.29	119.27	47.58	243.75	53.57	519.37	102.82	9089.74	410.65	569.5	0.204708
19-12-8-255	0.1	66.4	60	66.2		284.46	2.27	12.34	4.53		66.4	2.27		153225	238.85	4.15	443211	<0.29	15.47	<0.224	2.4	3.98	0.9	19.67	6.18	76.37	29.52	149.36	33.38	337.18	67.91	9254.5	349.39	341.76	0.31097
19-12-8-256	427.9	53.1	62	59.9		239.27	1.43	6.78	3.35		53.1	1.43		153225	279.82	3.01	439609	<0.247	30.68	<0.187	1.89	4.57	1.49	25.84	8.51	113.88	45.41	240.06	55.57	583.43	123.01	10020.5	470.29	584.6	0.419181
19-12-8-257	428.8	47.9	56	51		167.67	1.08	4.15	1.74		47.9	1.08		153225	507.95	4.27	443311	<0.195	67.21	0.181	2.53	6.24	1.82	35.77	12.54	160.81	63.44	334.11	75.28	766.65	155.29	9827.47	1353.04	1058.21	0.372425
19-12-8-258	775.7	636.7	666.2	762.6		40.9	6.34	8.91	16.31		636.7	6.34		153225	314.12	4.33	404201	<0.254	7.83	<0.183	<1.35	3.45	0.218	23.31	8.71	112.11	43.7	216.39	45.12	426.66	85.15	11435.6	109.21	561.81	0.0743182
19-12-8-259	0.1	50.3	48.9	51.1		522.84	2.06	12.33	9.49		50.3	2.06		153225	289.32	1.91	444451	<0.236	16.3	<0.216	<1.26	1.26	0.475	9.62	3.87	55.15	23.25	129.98	30.55	328.34	74.72	10582.9	151.3	324.21	0.4171
19-12-8-260	361.9	80.3	89.9	88.8		142.84	1.62	5.47	5.06		80.3	1.62		153225	422.84	2.41	427871	<0.266	22.99	<0.195	<1.41	3.17	0.613	21.99	8.84	119.31	48.29	254.5	57.11	550.45	113.81	11491.9	773.5	1591.78	0.224459
19-12-8-261	0.1	59.8	54.4	59.5		491.92	2.97	17.07	11.74		59.8	2.97		153225	386.44	3.49	451992	<0.259	13.02	<0.197	<1.38	1.45	0.554	10.81	4.38	58.82	25.89	145.57	34.33	369.79	85.77	10713.2	103.27	211.29	0.427792
19-12-8-262	910.3	50	72.7	51.4		193.98	1.5	6.73	3.6		50	1.5		153225	425.66	5.16	454040	<0.172	37.26	<0.229	<1.38	3.95	1.61	26.71	9.97	133.96	56.67	304.69	69.39	724.12	162.31	9191.37	448.1	576.13	0.479192
19-12-8-263	270.4	48.6	53.1	58.2		654.33	2.85	17.98	14.84		48.6	2.85		153225	138.56	2.17	453709	<0.300	11.02	<0.156	<1.20	0.55	0.235	4.23	1.89	26.55	11.86	70.46	17.61	200.64	47.96	11506.2	75.02	196.44	0.471016
19-12-8-264	222.6	119.4	124	110.1		202.64	3.42	10.43	5.68		119.4	3.42		153225	218.99	3.68	420593	<0.249	23.35	<0.33	1.5	1.37	0.439	8.91	2.92	38.25	15.21	87.62	21.18	226.2	52.51	10005	638.41	588.4	0.384136
19-12-8-265	0.1	50.8	46	56.3		247.13	1.59	8.88	5.58		50.8	1.59		153225	224.16	3.24	451986	<0.246	24.43	<0.244	<1.54	1.47	0.483	11.69	3.99	57.09	26.48	153.48	37.45	415.85	99.4	10571.8	250.65	479.52	0.356206
19-12-8-266	0.1	56.7	49.1	77.4		590.26	3.61	21.86	13.72		56.7	3.61		153225	279.37	4.87	455939	<0.217	10.26	<0.217	<1.35	1.86	0.788	10.83	3.89	50.05	21.44	118.16	28.24	301.39	72.2	9738.26	86.25	169.99	0.536754
19-12-8-267	0.1	14.4	11.4	17.1		0	0.53	2.65	2.42		14.4	0.53		153225	87.78	3.9	448034	<0.259	44.37	<0.222	2.03	3.19	0.614	13.79	3.53	34.8	11.11	53.11	11.93	129.09	30.61	11608.8	776.58	1666.45	0.283016
19-12-8-268	530.4	171.5	197.7	305.2		51.53	1.87	3.93	16.23		171.5	1.87		153225	972.57	21.62	423817	<0.255	3.33	<0.195	1.45	5.93	0.833	41.24	14.92	155.86	48.64	218.34	44.46	404.47	76.98	12123.8	118.28	1596.55	0.162846
19-12-8-269	0.1	65.6	59.6	58.7		631.1	3.17	23.8	16.54		65.6	3.17		153225	257.24	4.25	452757	<0.217	9.52	<0.170	<0.88	1.4	0.54	8.52	3.16	43.77	18.79	104.62	25.32	278.88	66.75	9708.86	67.3	148.63	0.478002
19-12-8-270	22	60.8	59.7	68.3		727.56	3.81	21.86	8.12		60.8	3.81		153225	349.26	14.53	453926	<0.245	13.16	0.257	4.11	8.37	1.164	41.7	12.95	156.17	56.85	256.53	48.67	418.6	79.12	9423.44	150.69	159.86	0.190477
19-12-8-271	57.1	51.3	51.3	54		443.65	1.86	10.54	7.85		51.3	1.86		153225	206.82	3.31	457172	<0.178	19.82	<0.188	<1.24	1.16	0.493	9.13	3.48	52.22	23.54	140.04	34.71	396.51	95.2	10678.5	177.94	394.83	0.463129
19-12-8-272	199.2	63	66.3	61.7		148.19	1.14	4.15	1.5		63	1.14		153225	514.31	4.13	484097	<0.208	56.46	0.202	3.22	8.05	0.834	52.89	18.28	233.78	88.11	419.29	85.1	751.26	142.58	11100.6	1311.39	914.58	0.123567
19-12-8-273	344.4	58.6	65.7	51.4		490.97	2.64	15.92	6.69		58.6	2.64		153225	689.53	7.51	460095	<0.212	19.6	<0.236	3.1	6.41	2.79	37.44	12.55	162.38	63.59	337.73	75.75	779.04	175.26	8260.72	205.19	233.03	0.550588
19-12-8-274	0.1	63.9	61.5	41		776.69	3.55	25.11	20.2		63.9	3.55		153225	304.72	3.45	450772	<0.169	9.05	<0.270	<1.59	1.23	0.532	8.89	3.4	48.53	21.17	121.5	28.64	317.14	75.66	9745.91	66.86	157.51	0.491844
19-12-8-275	294.8	60.9	66.9	56.7		665.45	3.87	23.07	13.42		60.9	3.87		153225	312.53	3.29	457478	<0.210	12.37	<0.198	1.19	2.82	0.951	15.7	5.67	72.63	28.32	152.69	34.64	357.87	80.78	10448.7	106.8	181.19	0.436944
19-12-8-276	97.3	59.5	60.2	71.5		717.33	3.66	22	14.51		59.5	3.66		153225	278.23	4.42	452275	<0.229	9.91	<0.186	<1.07	1.07	0.584	9.26	3.23	47.67	20.02	111.24	26.63	294.63	70.82	9275.7	89.85	175.79	0.567198
19-12-8-277	293.2	63	69	67		689.1	4.05	24.83	19.94		63	4.05		153225	250.28	4.19	451666	<0.268	8.46	<0.203	<1.38	1.26	0.538	7.67	2.62	36.94	16.64	92.16	22.56	255.53	62.99	9432.6	63.38	146.66	0.529077
19-12-8-278	0.1	57.5	50.4	71.4		724.43	3.82	26.12	16.07		57.5	3.82		153225	270.38	4.64	448539	<0.287	9.26	<0.179	<1.45	1.17	0.471	8.36	3.12	41.98	18.34	103.87	24.05	262.61	61.8	9848.42	68.42	140.68	0.46041
19-12-8-279	0.1	51.5	48.6	47.9		324.91	1.62	8.9	5.31		51.5	1.62		153225	205.08	3.27	453561	<0.272	21.21	<0.211	<1.17	0.81	0.496	8.43	3.16	46.8	20.45	115.11	28.24	310.07	72.65	10937.2	278.72	478.63	0.58029
19-12-8-280	1208	51.9	86.9	63.3		397.71	2.85	18.68	19.99		51.9	2.85		153225	102.58	2.29	458835	<0.165	8.07	<0.213	<1.10	<0.42	0.183	2.32	0.97	13.87	6.39	39.19	10.36	122.72	30.48	11721	66.2	201.13	n.a.
19-12-8-281	164.3	50.2	52.5	43.4		363.89	1.69	8.77	6.72		50.2	1.69		153225	452.73	2.18	447292	<0.208	18.1	<0.171	<1.18	1.23	0.46	10.89	4.46	62.34	27.24	153.68	37.18	400.77	89.36	10595	187.11	432.91	0.384247
19-12-8-282	134.6	60.6	62.2	57		581.93	3.25	17.69	8.15		60.6	3.25		153225	326.49	3.74	453597	<0.216	12.13	<0.254	2.11	3.65	1.49	20.21	6.6	78.12	31.02	158.41	35.6	369.69	83.37	9651.89	135.04	195.03	0.530367
19-12-8-283	152.5	96.4	98.3	84.1		96.1	1.36	3.77	2.31		96.4	1.36		153225	240.93	2.47	445405	<0.196	68.56	<0.166	<1.12	2.3	0.778	16.64	5.75	76.86	31.57	176.93	43.07	463.72	105.52	12747.6	1054.61	1173.55	0.384466
19-12-8-284	440.9	49.7	58.4	39.3		780.12	3.29	25.46	19.13		49.7	3.29		153225	134.04	<1.72	448817	<0.292	11.31	<0.253	<1.24	0.79	0.283	6.35	2.2	31.21	13.62	74.82	18.4	203.9	46.92	11093.5	82.25	189.66	0.386283
19-12-8-285	0.1	63.9	59	66.9		496.79	2.73	17.48	9.11		63.9	2.73		153225	436.09	4.94	458294	<0.217	14.4	<0.205	<1.31	2.74	0.962	16.38	5.91	78.42	32.56	173.09	39.98	417.62	95.52	10190.4	147.19	225.58	0.438998
19-12-8-286	306.8	60.9	67.3	58.6		357.47	2.12	11.22	4.34		60.9	2.12		153225	383.34	9.92	455869	<0.260	15.47	0.241	4.06	8.47	1.73	50.54	17.1	220.89	86.27	411.42	82.09	740.65	147.13	9690.63	337.33	338.11	0.255627
19-12-8-287	394.2	46.6	53.8	45.8		208.23	1.14	5.04	2.41		46.6	1.14		153225	228.77	3.3	451709	<0.220	29.99	<0.187	<1.17	1.87	0.601	11.43	4.27	57.58	23.98	132.09	31.1	328.36	75.14	10894.2	693.02	811.97	0.39742
19-12-8-288	229.7	58.9	63	76.1		625.77	3	20	13.18		58.9	3		153225	273.33	4.68	458126	<0.240	11.51	<0.219	<1.51	1.62	0.577	9.59	3.67	50.56	22.38	123.84	29.66	323.77	77.8	10022.4	100.01	209.91	0.447536
19-12-8-289	296.8	56.5	62.3	66.5		744.98	4.49	24.69	17.06		56.5	4.49		153225	240.31	4.33	453658	<0.270	9.35	<0.239	<1.21	0.93	0.471	7.88	2.85	39.58	16.82	92.6	22.35	242.79	58.89	10098.5	77	153.77	0.531907
19-12-8-290	105.1	50.6	51.6	49.5		404.55	1.67	9.65	6.15		50.6	1.67		153225	222.97	2.79	452157	<0.260	19.46	<0.187	<1.17	1.12	0.403	8.81	3.31	46.56	19.78	110.52	26.38	279.72	61.84	10879.2	235.08	439.94	0.392218
19-12-8-291	0.1	59.3	41.1	54.3		113.56	2.92	19.39	12.29		59.3	2.92		153225	292.61	4.96	454997	<0.227	11.45	<0.243	<1.49	1.48	0.668	10.14	3.89	53.36	23.32	128.31	30.83	339.17	81.81	9498.43	99.15	199.36	0.527164
19-12-8-292	403.1	455.7	445.7	442.1		65.82	5.52	10.36	7.06		455.7	5.52		153225	304.39	29.61	456069	<0.217	68.27	<0.254	3.8	6.6	1.18	31.79	10.01	111	38.83	183.71	36.81	333.01	61.71	10336	591.7	387.88	0.249049
19-12-8-293	333.7	50.1	56.2	50.1		384.77	1.8	10.31	9.41		50.1	1.8		153225	429.61	2.46	452162	<0.254	17.06	<0.231	<1.35	1.35	0.434	10.39	4.18	59	26.02	143.5	34.3	364.66	81.99	10512.6	152.69	386.5	0.35427
19-12-8-294	285.5	22.1	24.6	24.1		406.93	0.89	4.83	2.23		22.1	0.89		153225	91.56	1.95	446259	<0.275	36.9	<0.181	1.13	2.35	0.871	11.79	3.18	36.98	13.98	70.98	15.82	169.24	40.37	10486.4	637.91	796.83	0.505879
19-12-8-295	237.6	56.5	60.7	61.8		549.12	2.7	16.48	9.78		56.5	2.7		153225	386.43	6.32	454524	<0.226	16.3	<0.199	1.06	2.31	0.883	14.82	5.38	75.15	33.07	182.31	43.01	459.17	108.9	9032.22	126.99	231.77	0.461371
19-12-8-296	689.6	49	64.4	44		191.52	1.32	5.73	3.57		49	1.32		153225	217.47	2.23	446726	<0.223	28.44	<0.151	<0.86	1.5	0.611	10.92	4.35	61.55	26.36	150.35	36.24	395.03	90.12	10560.1	447.65	668.92	0.461534
19-12-8-297	177.9	57.3	60	59		172.5	1.11	4.42	2.18		57.3	1.11		153225	243.57	2.61	442610	<0.235	39.36	<0.178	<1.21	2.24	0.712	14.61	5.44	71.35	29.36	159.23	36.5	383.9	88.17	10233.4	947.32	993.97	0.380496
19-12-8-298	346.4	58	65.1	53.6		676.48	3.48	23.22	13.68		58	3.48		153225	325.86	3.22	451380	<0.256	10.47	<0.205	<1.32	2.59	0.873	14.2	4.72	62.49	25.09	131.78	30.42	330.6	76.01	10046.2	97.51	167.38	0.440088
19-12-8-299	0.1	50.3	47.1	53.1		287.16	1.49	8.11	4.1		50.3	1.49		153225	212.49	2.55	443284	<0.235	22.57	<0.185	<1.16	1.24	0.43	8.41	3.23	45.05	19.35	106.22	25.28	274.27	63.6	10352.1	355.07	533.79	0.407079
19-12-8-300	211.1	52.9	56.3	54.4		408.36	2.63	10.65	9.01		52.9	2.63		153225	363.77	2.78	446740	<0.251	18.88	<0.210	<1.50	1.84	0.557	11.06	4.31	60.94	26.38	144.91	35.71	383.05	89.12	10211.4	243.79	448.01	0.377475
19-12-8-301	22.6	50.3	49.5	60.1		844.45	2.73	22.17	7.55		50.3	2.73		153225	364.92	4.01	462009	<0.275	41.85	<0.195	<1.18	2.17	0.535	16.93	6.04	85.08	35.4	187.72	41.73	415.14	87.18	11213.6	165.98	198.44	0.269845
19-12-8-302	0.1	49.6	43.8	52.4		153.28	1.44	7.77	3.91		49.6	1.44		153225	248.42	3.35	474391	<0.240	30.02	<0.163	<1.16	2.49	0.826	15.6	5.77	80.37	33.73	187.37	44.98	484.01	110.31	10669.6	409.1	594.36	0.40517
19-12-8-303	425.4	13.1	15.6	16.9		614.08	0.69	5.12	3.24		13.1	0.69		153225	147.87	2.79	462151	<0.174	22.27	<0.188	<1.70	2.54	0.857	11.31	3.79	45.95	18.53	97.81	23.73	254.55	61.11	11773.8	421.36	843.27	0.488824
19-12-8-304	390.3	27.6	32.1	37.3		239	0.76	3.52	2.78		27.6	0.76		153225	89.19	2.34	466766	<0.28	35.46	<0.184	1.42	1.8	0.639	8.49	2.31	26.61	10.11	51.63	11.88	129.76	32.75	11492.9	598.1	1207.06	0.499724
19-12-8-305	421.3	49.4	57.6	48.5		307.43	1.5	8.33	3.76		49.4	1.5		153225	207.76	2.64	460314	<0.230	38.87	<0.195	1.45	2.45	0.771	13.61	4.94	66.62	27.8	154.3	36.49	388.94	87.31	10716.6	421.06	523.65	0.408189
19-12-8-306	0.1	13.9	13.4	14.1		916.91	0.98	7.28	2.45		13.9	0.98		153225	83.24	2.61	454776	<0.289	24.44	<0.219	<1.37	1.14	0.559	5.87	1.79	20.74	8.64	46.77	10.79	119.81	29.97	10932.6	580	600.57	0.660632
19-12-8-308	201.8	12.8	13.8	16.2		182.69	0.26	1.11	1.25		12.8	0.26		153225	124.05	2.64	457108	<0.219	48.53	<0.216	<1.35	2.87	0.573	14.15	4.3	55.57	22.79	128.96	32.6	378.21	90.89	13942.6	1252.92	4155.64	0.274887
19-12-8-309	366.5	22.7	26.2	30.3		418.93	0.89	5.4	14.18		22.7	0.89		153225	72.65	<1.70	472212	<0.289	6.88	<0.176	<1.32	<0.47	<0.126	2.27	0.86	13.28	6.65	43.31	12.32	151.57	38.58	14237.4	88.9	773.69	n.a.
19-12-8-310	0.1	88.4	82.4	85		15.84	1.13	3.01	2.46		88.4	1.13		153225	245.14	5.72	454722	<0.260	25.17	<0.216	1.75	4.43	0.151	26.53	8.83	111.32	41.24	200.17	41.9	365.93	68.6	13567.8	975.24	1684.18	0.042582
19-12-8-311	107.3	179.8	174.2	177.5		83.07	2.16	5.53	3.31		179.8	2.16		153225	639.52	3.69	505753	<0.23	42.3	<0.187	1.41	3.95	0.655	32.48	12.29	171.03	73.76	380.26	84.47	850.21	171.41	11689.7	440.42	639.13	0.176789
19-12-8-312	178.5	14	15	15.9		890.24	1.01	7.52	2.35		14	1.01		153225	84.88	2.85	474914	<0.270	25.37	<0.267	<1.34	1.46	0.537	4.64	1.52	16.64	6.69	35.32	8.36	95.07	23.05	11784.1	595.92	593.85	0.630752
19-12-8-313	0.1	64.3	58.7	45.9		730.13	3.85	26.7	15.77		64.3	3.85		153225	284.41	5.62	469348	<0.285	11.41	<0.267	<1.52	1.19	0.595	9.37	3.68	50.48	22.03	121.58	28.85	313.25	73.53	9813.98	95.8	166.08	0.544745
19-12-8-314	394.6	28.7	33.4	23.9		652.84	1.72	11.67	5.11		28.7	1.72		153225	222.11	4.05	462654	<0.32	29.04	<0.219	2.35	3.48	0.884	14.36	4.71	59.8	24.06	128.37	28.85	288.01	62.75	10086.9	358.05	438.32	0.382301
19-12-8-315	0.1	63.7	60.9	110.2		1163.84	5.76	43.19	28.32		63.7	5.76		153225	254.86	4.72	460857	<0.289	7.86	<0.221	<1.37	1.02	0.414	8.52	2.76	37.23	15.99	91.07	22.02	242.65	59.28	9563.23	59.76	132.68	0.429339
19-12-8-316	546.4	13	16.4	44.2		183.88	0.34	1.39	11.88		13	0.34		153225	655.45	5.79	457070	<0.224	1.45	<0.231	<1.44	0.64	<0.125	8	4.78	82.96	38.05	225.18	56.38	579.8	116.13	15480	119.32	3562.65	n.a.
19-12-8-317	237	127.3	132.6	130.2		175.62	2.61	9.71	4.7		127.3	2.61		153225	243.56	4.58	446286	<0.244	14.43	0.59	8.98	14.2	2.54	72.12	20.93	228.98	79.01	338.62	63.12	527.42	99.46	7462.13	438.39	421.51	0.24265
19-12-8-318	0.1	34.2	31.5	30.1		491.23	1.64	9.91	3.38		34.2	1.64		153225	245.97	3.68	451843	<0.281	52.61	<0.180	1.45	3.25	0.679	16.61	5.32	68.09	24.94	122.38	25.88	239.09	44.59	10285.1	571.28	552.74	0.282529
19-12-8-319	348.1	66.1	74.1	74.7		437.63	3.29	15.51	11.76		66.1	3.29		153225	280.5	4.62	459867	<0.288	12.27	<0.218	<1.27	1.42	0.603	10	3.57	51.92	22.52	127.8	29.92	332.13	78.59	9806.04	105.27	228.88	0.489207
19-12-8-320	155.8	125.7	126.7	130.6		56.61	1.3	2.74	7.03		125.7	1.3		153225	185.79	1.96	448148	<0.273	5.42	<0.180	<1.19	1.12	0.332	10.18	4.91	78.12	36.65	216.96	55.3	617.08	142.13	16063.1	258.94	2094.49	0.30059
19-12-8-322	365.8	53.9	61.2	53.3		325.3	1.66	9.33	4.79		53.9	1.66		153225	256.79	6.52	413405	<0.236	15.63	<0.208	1.52	3.44	0.442	19.29	6.45	81.2	31.67	159.82	34.81	340.64	65.18	9243.49	293.39	408.89	0.165881
19-12-8-323	18.1	46.7	45.9	44.5		222.58	0.99	4.36	3.64		46.7	0.99		153225	123.41	4.67	412020	<0.214	31.32	<0.208	<1.14	1.45	0.486	8.25	2.36	26.62	9.68	47.18	10.78	111.14	22.41	10302.7	412.33	915.53	0.429581
19-12-8-324	57.8	28.5	28.7	28.6		320.46	0.8	4.13	0.9		28.5	0.8		153225	282.27	12.11	418236	<0.239	128.37	1.44	20.43	28.75	7.82	85.71	19.3	175.5	50.06	197.37	35.55	304.72	51.06	8951.08	2363.06	915.37	0.481606
19-12-8-325	0.1	14.3	11	14		0	0.56	2.84	0.71		14.3	0.56		153225	217.77	4.4	421349	<0.227	168.28	0.381	6.77	13.82	4.03	55.9	15.19	160.9	53.93	239.74	48.63	452.36	78.68	9003.49	2436.15	1388.48	0.443266
19-12-8-326	331.6	15.1	17.2	17		740.22	0.91	7.03	2.27		15.1	0.91		153225	130.99	2.43	437282	0.53	24.95	<0.161	<1.12	1.18	0.507	5.77	1.67	18.32	6.7	34.74	8.26	87.4	19.52	10619	508.29	536.89	0.594016
19-12-8-328	334.3	54.3	60.8	39.2		944.98	4.77	33.28	19.48		54.3	4.77		153225	198.43	9.98	444520	<0.210	9.4	<0.219	<0.82	0.81	<0.123	6.94	2.4	35.09	13.5	71.99	16.46	166.47	34.02	10589.7	81.49	169.16	n.a.
19-12-8-329	98.1	69.9	70.5	71.2		431.76	2.54	14	5.41		69.9	2.54		153225	258.49	3.14	448359	<0.234	16.76	<0.185	1.5	3.01	0.517	16.4	5.84	74.4	29.89	146.59	31.16	292.32	58.74	10223	297.49	294.5	0.22496
19-12-8-330	175.1	117.4	119.7	109.7		132.19	1.99	6.43	8.33		117.4	1.99		153225	195.48	2.23	442926	<0.197	8.83	<0.207	<1.13	1.14	0.297	8.67	3.63	57.31	25.2	144.59	34.74	367.58	82.76	12158.3	183.02	618.22	0.288811
19-12-8-331	84.8	50.1	50.6	50.1		194.39	0.99	4.17	1.9		50.1	0.99		153225	166.46	3.55	443935	<0.211	73.91	<0.205	1.36	2.28	0.589	12.88	4.5	61.63	28.21	167.85	44.3	523.73	131.23	11173.7	1021.35	1040.51	0.332284

## Sheet: River 3
	Age (Ma)					1s error					Age used (Ma)	1s error		Trace elements (ppm)
	Pb207/Pb206	Pb206/U238	Pb207/U235	Pb208/Th232		Pb207/Pb206	Pb206/U238	Pb207/U235	Pb208/Th232					Si	P	Ti	Zr	La	Ce	Pr	Nd	Sm	Eu	Gd	Tb	Dy	Ho	Er	Tm	Yb	Lu	Hf	Th	U	Eu/Eu*
19-12-14-1	993.5	1031	1016.6	1007.4		35.48	10.18	10.5	28.35		993.5	35.48		153225	601.29	7.41	447863	<0.219	3.3	<0.213	1.04	2.82	<0.116	20.16	7.27	96.34	35.76	175.45	35.74	327.33	62.67	11696.8	81.03	275.38	n.a.
19-12-14-2	207.7	48.7	51.9	50.1		527.02	2.05	13.43	5.32		48.7	2.05		153225	373.14	11.65	451448	<0.224	60.69	0.206	3.27	5.42	2.19	29.63	9.54	117.69	44.15	219.42	46.52	443.7	91.92	8276.41	269.17	285.24	0.528321
19-12-14-3	86	48	48.6	53.2		1138.27	4.21	32.89	8.27		48	4.21		153225	270.05	10.24	453178	<0.222	29.8	0.3	5.43	8.11	2.94	35.75	10.19	113.46	39.92	185.36	38.33	351.52	71.73	8262.6	150.75	118.91	0.527859
19-12-14-4	165.9	52.1	54.4	45.6		731.78	3.39	20.74	7.85		52.1	3.39		153225	213.28	3.79	452578	<0.229	48.55	<0.186	1.18	2.39	0.744	13.99	4.76	62.15	24.03	120.47	26.25	256.07	52.72	10273.5	190.91	205.84	0.393355
19-12-14-5	924	967.7	952.1	933.8		44.18	10.55	12.63	20.46		967.7	10.55		153225	248.65	10.96	453616	<0.223	12.72	<0.204	1.36	2.15	0.33	13.32	4.64	58.39	21.81	104.22	21.1	189.96	36.37	10117.1	143.73	226.16	0.188522
19-12-14-6	1157.1	52.1	85.1	42		458.84	4.16	21.06	8.56		52.1	4.16		153225	348.34	13.46	453879	<0.224	19.53	<0.217	1.61	4.38	0.828	25.25	8.96	115.13	43.91	216.73	46.08	433.91	88.44	10916.7	124.76	195.86	0.240703
19-12-14-7	0.1	52.6	47.5	56		765.93	3.4	24.03	9.03		52.6	3.4		153225	247.08	10.82	449882	0.174	7.07	<0.160	1.95	4.11	0.768	23.64	7.81	93.04	34.51	159.42	31.72	286.21	56.25	9501.52	111.69	140.72	0.238197
19-12-14-8	268.5	46.6	50.9	47.5		455.64	1.84	11.24	5.32		46.6	1.84		153225	147.58	2.31	453010	<0.239	27.23	<0.211	1.03	1.36	0.428	7.76	2.98	40.9	17.75	103.3	26.45	302.05	72.54	10384.9	226.95	326.51	0.402775
19-12-14-9	0.1	50.3	41.4	48		1004.29	4.49	35.5	16.01		50.3	4.49		153225	227.62	13.43	455202	<0.252	8.93	<0.210	<1.30	1.53	0.294	9.77	3.52	45.58	16.94	84.9	17.95	171.01	34.06	10197.6	110.44	158.14	0.232474
19-12-14-10	309.4	49.4	54.9	51.9		782.7	3.06	23.5	7.24		49.4	3.06		153225	300.98	15.36	458257	<0.242	32.66	<0.228	2.47	4.24	1.51	20.01	6.64	81.63	32.01	162.8	35.6	351.99	74.02	7939.71	170.72	165.69	0.501176
19-12-14-11	1866.3	1875	1867.6	1868.5		17.46	14.46	7.49	44.95		1866.3	17.46		153225	744.61	5.06	450100	<0.201	1.93	<0.192	1.44	3.28	<0.130	22.85	8.62	117.05	46.2	232.24	48.46	451.82	88.56	12456.2	59.16	343.46	n.a.
19-12-14-12	1975.2	1782.8	1870	1969.2		19.98	15.3	8.8	32.25		1975.2	19.98		153225	371.78	9.22	452214	<0.176	8.84	<0.232	1.31	2.8	0.141	13.96	4.94	61.98	23.06	110.45	22.66	202.47	39.3	11507.7	120.27	243.15	0.0689472
19-12-14-13	225.7	114.2	119	143.9		203.1	2.55	10.26	17.49		114.2	2.55		153225	101.54	<1.67	457963	<0.227	2.1	<0.207	<1.12	<0.49	<0.116	2.96	1.07	16.5	7.76	46.55	12.2	137.1	31.43	12116.2	69.63	372.53	n.a.
19-12-14-14	502.5	50.1	60.5	48		230.19	1.38	6.4	2.92		50.1	1.38		153225	3071.77	6.88	461815	9.23	95.01	4.06	20.91	11.05	2.18	44.11	13.93	176.19	65.23	314.82	64.67	605.29	121.81	9569.45	624.96	613.46	0.301874
19-12-14-15	211.8	14.3	15.4	14.7		195.98	0.31	1.34	0.57		14.3	0.31		153225	711.51	6.84	449013	<0.222	88.81	1.34	19.69	35.99	3.63	146.42	38.95	375.65	113.63	454.49	82.51	682.34	125.31	9930.75	3218.03	3244.39	0.152874
19-12-14-16	285.1	45.1	49.6	46		503.87	2.31	12.3	6.77		45.1	2.31		153225	420.4	3.46	487385	<0.150	36.33	<0.169	<1.13	2.29	0.521	13.24	5.28	65.64	27.35	147.85	33.27	335.38	72.33	11015.6	209.33	327.63	0.289265
19-12-14-17	432.6	45.9	53.8	44.7		270.06	1.4	6.74	2.84		45.9	1.4		153225	266.81	2.17	456426	<0.260	64.22	0.265	3.7	6.5	1.86	30.86	9.47	110.68	42.87	220.84	50.72	533.61	123.67	10509	594.71	588.34	0.401493
19-12-14-18	1026.7	1097	1071.2	1069		38.44	11.49	11.86	21.16		1026.7	38.44		153225	779.59	12.71	455440	<0.252	3.7	0.176	1.71	4.01	<0.121	27.22	9.92	129.63	50.06	238.27	47.49	417.25	77.49	11618.6	142.85	219.74	n.a.
19-12-14-19	304.6	51.8	57.4	46		475.69	2.36	13.32	5.66		51.8	2.36		153225	411.01	19.86	460750	<0.245	13.69	0.34	5.48	9.89	1.13	51.55	15.69	190.65	67.28	301.11	56.64	480.86	90.25	9051.08	251.43	268.14	0.152998
19-12-14-20	229.7	66.9	71.3	112		220.39	1.66	6.85	7.33		66.9	1.66		153225	220.63	4.05	449281	<0.203	11.73	<0.204	1.11	2.05	<0.112	12.68	4.73	61.41	24.18	118.79	25.1	232.42	45.61	11193.4	213.94	520.99	n.a.
19-12-14-21	374.4	46.2	52.9	47.9		466.76	1.98	12.22	5.5		46.2	1.98		153225	186.98	2.82	452040	<0.185	42.14	<0.231	<1.32	2	0.638	11.17	3.82	52.74	21.43	114.74	27	280.76	61.46	10204.3	249.22	313.78	0.412666
19-12-14-22	0.1	66.3	59	63.9		190.18	2.17	10.42	6.4		66.3	2.17		153225	263.64	1.99	448544	<0.246	11.63	<0.192	<1.31	1.78	0.166	12.74	5	69.3	28.83	150.22	33.2	315.25	65.63	11353.6	233.09	407.41	0.106569
19-12-14-23	195.2	48.9	51.7	46.9		270.86	1.31	6.28	2.52		48.9	1.31		153225	215.85	3.7	451321	<0.209	58.1	0.231	2.94	4.68	2.76	26.54	9	113.35	46.45	251.39	59.96	637.46	142.67	7250.62	582.25	596.72	0.757103
19-12-14-24	485.4	584.8	563.3	563.4		118.05	10.38	23	11.66		584.8	10.38		153225	192.54	8.64	447635	<0.232	38.45	0.246	3.42	5.44	1.09	23.15	5.75	57.49	18.26	74.68	13.76	117.63	21.72	9704.06	249.67	110.32	0.296942
19-12-14-25	81.7	48.9	49.4	46		449.57	2.02	10.32	2.67		48.9	2.02		153225	214.94	3.36	447946	<0.253	46.99	0.377	5.53	10.94	3.12	52.02	15.15	165.99	55.9	246.83	48.52	438.91	85.97	11152.5	517.27	301.03	0.399834
19-12-14-26	87	57.3	57.8	76.9		657.08	3.38	18.91	15.67		57.3	3.38		153225	235.74	3.96	440941	<0.252	14.7	<0.280	<1.34	1.8	0.193	11.52	3.97	52.55	21.38	111.95	25.64	257.24	53.96	11856.5	120.09	235.61	0.129573
19-12-14-27	479.2	129.4	148.9	131		390.69	5.84	27.04	7.41		129.4	5.84		153225	287.73	5.91	428415	<0.27	10	0.5	6.78	11.08	1.67	49.6	13.08	140.06	47.24	208.78	39.09	335.21	62.77	8555.67	262.1	138.15	0.217784
19-12-14-28	351	44.9	50.8	49.3		464.91	1.98	11.64	4.51		44.9	1.98		153225	255.45	3.11	460746	0.31	52.74	<0.217	<1.24	2.71	0.88	15.62	5.33	72.16	28.44	152.2	34.26	337.15	72.05	9950.55	307.13	345.36	0.413501
19-12-14-29	477.4	50.2	60	48.3		232.08	1.34	6.39	2.7		50.2	1.34		153225	272.73	8.37	447511	<0.188	32.42	0.66	11.22	19.84	3.49	93.08	26.39	287.43	94.54	412.22	78.02	678.36	127.32	7779.63	633.25	639.59	0.248282
19-12-14-30	751.6	642.5	665.3	618.4		108.2	13.65	24.47	34.07		642.5	13.65		153225	191.23	3.37	454848	<0.200	4.72	<0.287	1.52	3.24	0.336	17.45	5.5	67.44	24.04	108.42	20.74	181.28	33.66	8707.29	38.12	104.37	0.136612
19-12-14-31	0.1	62.1	59.8	65.7		218.06	1.37	6.06	3.58		62.1	1.37		153225	425.55	2.07	414583	<0.29	12.85	<0.28	1.96	6.56	0.338	40.91	14.32	183.66	67.6	315.25	61.18	530.53	103.33	8529.91	471.37	664.92	0.0630768
19-12-14-32	564.4	50.9	63.2	47.1		435.52	2.22	13.86	4.29		50.9	2.22		153225	338.36	8.81	451059	<0.239	43.76	<0.205	2.05	3.87	0.736	21.06	7.16	86.72	32.33	154.52	32.42	308.39	61.56	9856.75	325.81	287.27	0.249237
19-12-14-33	0.1	47.9	41.6	50.2		573.14	2.48	18.15	6.26		47.9	2.48		153225	284.3	4.9	450629	<0.234	71.72	<0.200	2.06	4.24	1.23	23.46	7.62	98.93	37.57	187.44	40.62	396.48	81.39	9473.64	248.14	273.23	0.377031
19-12-14-34	255.4	49.1	53.3	47		240.75	1.33	5.72	2.09		49.1	1.33		153225	268.44	4.19	448125	<0.244	56.57	1.4	18.74	22.38	8.18	80.51	21.69	231.16	78.48	360.36	75.41	712.96	142.58	6318.74	855.71	653.81	0.589139
19-12-14-35	0.1	76.3	71	85		1186.63	6.18	54.44	16.1		76.3	6.18		153225	238.46	6.28	451441	<0.237	12.8	<0.183	2.7	4.46	1.08	22.15	6.66	75.89	27.78	128.15	24.81	225.59	44.56	9193.75	84.73	84.11	0.332192
19-12-14-36	720.2	528.4	564.4	508.6		99.75	10.16	19.82	24.13		528.4	10.16		153225	342.14	7.15	460847	<0.248	10.74	<0.207	<1.39	3.19	0.504	19.33	6.52	87.58	34.2	165.87	33.6	300.68	60.21	10090.9	109.43	183.45	0.196218
19-12-14-37	690.2	10.3	13.8	9.9		441.95	0.6	3.19	0.89		10.3	0.6		153225	82.3	1.64	453960	<0.185	49.28	0.54	8.34	11.72	2.93	30.21	6.6	55.25	16.1	66	14.2	157.34	41.35	11270.3	1043.78	959.92	0.476045
19-12-14-38	379.2	59.4	67.7	61.6		217.2	1.44	6.59	3.75		59.4	1.44		153225	378.19	<1.70	454067	<0.265	11.22	<0.234	2.78	7.49	0.47	47.78	16.18	196.46	72.49	330.81	63.51	548.48	105.98	9750.83	422.99	622.58	0.0759545
19-12-14-39	613.8	457.9	483.2	441.5		120.84	11.22	20.83	15.17		457.9	11.22		153225	267.82	21.49	483465	<0.228	47.63	0.245	5.09	8.19	1.25	32.8	9.11	96.94	31.84	139.73	26.88	238.45	43.86	10448.9	276.08	174.35	0.233158
19-12-14-40	268.4	64.1	69.5	69.8		577.02	3.42	20.03	12.82		64.1	3.42		153225	280.72	5.05	457102	<0.246	9.29	0.169	1.51	4.28	0.614	23.69	7.92	101.06	38.06	180.74	35.77	324.67	64.91	9127.94	118.83	221.13	0.186416
19-12-14-41	336.4	61.1	68.3	61.5		541.98	3.08	18.53	7.93		61.1	3.08		153225	268.1	4.18	449299	<0.244	8.42	<0.257	1.89	4.67	0.82	28.06	9.1	106.56	39.57	181.45	35.2	308.05	60.11	9230.58	130.18	212.85	0.218993
19-12-14-42	0.1	52.6	48.5	21.4		435.75	2.87	12.96	37.69		52.6	2.87		153225	58.62	<2.44	444265	<0.38	5.05	<0.37	<2.65	<0.61	<0.210	<1.40	0.5	6.08	2.83	16.71	4.11	48.64	12.75	10173.9	67.71	476.77	n.a.
19-12-14-43	250.7	53.2	57.5	47.4		652.9	3.45	19.25	6.71		53.2	3.45		153225	348.58	21.03	434239	<0.168	37.83	0.219	3.44	5.49	2.01	25.43	7.43	86.74	30.92	144.2	29.72	285.75	58.16	7107.33	146.18	135.46	0.520063
19-12-14-44	187.4	29.7	31.6	30		349.43	0.94	5.12	1.32		29.7	0.94		153225	263.55	10.12	439706	<0.230	120.68	0.359	5.41	9.04	2.63	38.4	10.66	115.15	40	175.49	34.12	308.38	57.44	9294.43	1369.7	791.7	0.431544
19-12-14-45	278.8	52.2	57.1	46.7		1092.39	5.15	37.77	10.51		52.2	5.15		153225	16415.5	6.73	439459	238.48	601.57	68.09	280.88	51.94	7.28	71.22	15.33	153.78	51.69	237.86	47.2	435.79	86.97	7792.91	243.12	189.2	0.365931
19-12-14-46	0.1	46.8	42.7	41.1		758.02	2.87	20.83	4.45		46.8	2.87		153225	360.85	12	445698	<0.297	78.74	0.232	4.1	6.77	2.58	32.72	9.92	116.46	43.35	201.38	40.68	370.53	75.52	7262.64	281.39	166.1	0.529954
19-12-14-47	109.3	49.9	50.9	49.2		379.44	1.72	8.84	2.24		49.9	1.72		153225	343.86	6.89	443142	<0.214	87.15	0.67	9.78	14.9	4.82	63.57	18.25	201.13	68.03	317.17	64.62	592.25	118.7	7728.21	688.43	365.61	0.478792
19-12-14-48	166	20.8	22	24.9		331.11	0.71	3.34	1.52		20.8	0.71		153225	121.31	3.1	393140	<0.262	38.28	<0.185	<1.58	1.95	0.67	9.61	2.79	34.48	15.03	82.36	20.78	228.02	55.47	10271.3	1552.42	1611.52	0.473168
19-12-14-49	6.3	82	79.2	71.4		233.64	2.63	7.59	5.51		82	2.63		153225	246.23	3.98	509453	0.59	36.66	0.39	2.91	3.11	1.03	14.07	4.76	60.01	23.5	116.98	28.2	293.68	65.03	11234.4	427.95	697.11	0.476025
19-12-14-50	814.5	799.2	801.1	733.1		28.55	6.82	6.9	19.2		799.2	6.82		153225	311.02	13.03	447026	<0.188	2.45	<0.166	1.21	4.14	0.146	22.48	6.54	60.4	15.54	50.47	7.42	53.23	7.92	12335	121.84	608.55	0.0462673
19-12-14-51	208.7	64.8	68.5	64		853.82	5.14	31.81	18.69		64.8	5.14		153225	219.07	6.19	452046	<0.222	5.92	<0.190	<1.35	1.35	0.265	8.42	3.1	42.13	16.36	81.83	17.16	161.8	34.45	9650.79	46.74	84.53	0.240294
19-12-14-52	355.8	115.6	127	118.5		214	2.85	11.77	10.49		115.6	2.85		153225	488.47	12.64	450580	<0.244	2.84	0.68	10.76	21.93	1.1	90.45	19.1	116.66	18.53	41.77	4.66	27.46	3.66	10991.4	141.25	321.97	0.0755072
19-12-14-53	810.7	844.4	833	807.1		15	5.53	3.36	6.9		844.4	5.53		153225	342.65	3.3	430548	<0.184	25.69	0.236	4.87	9.78	0.322	52.28	18.6	240.36	95.92	481.85	102.03	937.53	180.97	14303.2	1595.8	2957.01	0.043535
19-12-14-54	0.1	67.7	62	65		356.34	2.66	13.97	6.35		67.7	2.66		153225	274.15	5.66	457989	<0.160	12.27	<0.171	1.16	2.56	0.543	15.55	5.4	69.93	27.06	134.08	28.49	263.3	53.22	9385.71	187.42	224.29	0.263108
19-12-14-55	394.8	493.3	474.8	545		86.1	8.29	14.12	19.75		493.3	8.29		153225	1048.94	5.14	410492	0.67	15.28	0.46	3.32	3.91	0.315	21.73	8.29	115.06	45.13	226.15	46.99	423.25	83.99	9804.31	258.32	504.23	0.104475
19-12-14-56	13.5	54.1	53	55.6		367.01	1.99	8.65	4.15		54.1	1.99		153225	310.48	6.24	481318	<0.162	21.1	0.182	2.25	4.61	0.69	27.92	9.45	121.74	45.99	221.63	43.8	410.83	79.18	9169.16	412.38	428.78	0.185935
19-12-14-57	915.6	887.8	894	815.5		73.9	17.8	18.97	23.04		887.8	17.8		153225	196.66	4.87	460384	<0.266	10.63	<0.195	<1.35	1.37	0.336	7.01	2.38	28.29	10.23	51.29	10.77	104.91	21.79	10376.7	110.77	131.15	0.331466
19-12-14-58	30.6	57.1	56.3	37.7		1140.76	8.56	37.08	20.7		57.1	8.56		153225	406.35	8.42	522440	<0.196	14.19	<0.174	1.17	2.54	0.56	15.13	5.84	76.16	31.26	163.28	36.23	358.14	75.57	10631.5	69.04	112.59	0.276167
19-12-14-59	274.6	190.1	196	132.1		48.49	2.43	3.24	10.81		190.1	2.43		153225	244.9	<1.58	458244	<0.267	4.9	<0.195	<1.01	1.27	0.174	10.42	4.2	62.87	27.61	156.22	38.17	419.18	102.01	11606.1	116.39	2003.33	0.146229
19-12-14-60	15.4	51.1	50.3	59.7		748.37	4.02	19.01	4.66		51.1	4.02		153225	349.98	10.2	481612	<0.206	42.99	0.283	5.28	8.65	2.83	37.33	10.96	120.48	41.46	187.49	37.38	344.78	67.83	8781.57	208.31	187.33	0.48147
19-12-14-61	298	79.5	86.7	76.2		112.26	2.1	3.65	2.91		79.5	2.1		153225	178.69	7.79	450653	<0.262	50.02	<0.209	2.24	3.8	1.278	20.21	6.24	73.51	29.93	157.29	38.09	410.52	97.55	11011.4	2324.89	1548.42	0.445836
19-12-14-62	422.4	45.3	53	50.6		796.16	5.62	23.06	6.55		45.3	5.62		153225	368.66	7.12	456329	<0.220	58.6	<0.227	2.35	3.99	1.37	21.3	7.17	82.94	31.45	151.51	33.09	310.75	67.72	8690.11	315.75	236.77	0.454322
19-12-14-63	216.2	81.8	86.2	82.3		273.57	3.36	10.12	17.47		81.8	3.36		153225	65.11	<1.38	462890	<0.220	3.99	<0.222	<1.25	<0.44	0.138	0.93	0.383	4.66	2.43	15.1	4.71	65.08	20.35	13732.1	80.52	405.26	n.a.
19-12-14-64	873.1	846.1	851.8	789.9		40.46	10.97	9.35	19.05		846.1	10.97		153225	367.03	12.67	457715	<0.33	19.45	<0.301	<1.68	3.04	0.163	20.49	7.38	92.59	35.56	173.64	35.88	322.3	62.75	10828	269.46	734.15	0.0631392
19-12-14-65	1180.1	1171.5	1172.4	1095.4		45.47	18.04	13.26	30.67		1180.1	45.47		153225	326.68	6.41	468130	<0.152	22.78	<0.173	1.24	2.68	0.493	13.33	4.69	57.14	21.87	102.79	21.85	204.35	41.1	9890.01	76.64	173.46	0.252164
19-12-14-66	228	79.5	84.3	75.4		195.55	3.24	6.51	3.62		79.5	3.24		153225	166.29	2.72	490161	<0.192	35.77	<0.186	2.53	3.17	1.36	15.29	4.63	57.09	21.6	118.84	27.78	308.91	75.05	11093.1	691.16	721.56	0.597207
19-12-14-67	372.4	48.8	55.7	49		335.27	2.81	8.43	3.56		48.8	2.81		153225	221.55	2.79	455018	<0.273	41.59	<0.291	<1.82	2.69	0.873	13.41	4.63	61.75	26.46	145.94	36.43	404.69	97.09	10508.3	542.8	584.94	0.444368
19-12-14-68	221.4	47.4	50.8	44.7		655.48	3.36	16.99	7.58		47.4	3.36		153225	220.59	<2.85	460876	<0.40	13.99	<0.41	<2.16	3.41	0.624	16.79	6.13	81.3	32.54	172.12	38.25	391.81	84.14	10556.4	300.89	414.19	0.252117
19-12-14-69	229.9	46.5	50	50		800.62	5.73	21.12	8.29		46.5	5.73		153225	279.22	15.82	462957	<0.252	12.28	0.293	3.53	5.7	0.905	26.61	8.03	92.68	31.89	147.21	28.85	261.38	50.73	8244.21	147.32	157.58	0.224651
19-12-14-70	248.2	87.9	93.6	119.5		283.3	4.33	11.24	9.08		87.9	4.33		153225	258.23	2.74	445741	<0.246	7.46	<0.230	1.54	3.38	0.53	19.37	6.39	79.2	29.91	142.54	29.46	272.71	54.29	10397	165.95	320.65	0.20025
19-12-14-71	266.9	18.7	20.7	18.5		876.88	1.89	10.23	2.37		18.7	1.89		153225	174.83	2.99	418915	<0.26	39.39	<0.234	1.51	2.77	1.03	14.71	4.51	52.54	20.63	101.73	21.8	224.87	48.79	8797.35	465.94	355.45	0.493299
19-12-14-72	233.3	48.4	52.1	46.6		341.11	2.38	7.98	3.18		48.4	2.38		153225	478.2	5.06	452074	<0.246	49.58	<0.211	3.52	7.44	1.42	42.67	13.9	170.85	61.86	284.77	56.9	509.76	97.63	10166	547.77	562.68	0.243646
19-12-14-73	36.1	121.8	117.4	118.3		166.15	3.32	7.53	4.16		121.8	3.32		153225	336.08	2.15	448996	<0.263	12.13	<0.223	1.85	4.39	0.416	29.15	10.4	133.94	52.15	241.74	47.25	415.42	79.67	11410.9	482.27	572.57	0.112425
19-12-14-74	97.5	48.6	49.5	51.8		679.4	4.18	16.7	5.84		48.6	4.18		153225	255.84	10.12	493042	<0.204	18.79	0.262	3.49	7.17	0.869	36.92	11.17	123.65	44.79	203.37	39.35	346.84	67.34	11261.2	273.41	263.83	0.163286
19-12-14-75	0.1	49.4	35.9	47.6		275.36	5.15	17.99	3.86		49.4	5.15		153225	282.1	8.54	421867	<0.249	80.92	0.256	3.62	5.82	2.52	30.59	8.54	98.85	35.22	165.44	32.38	310.56	64.84	7335.16	523.46	235.07	0.577389
19-12-14-76	497.2	14.4	17.6	8.6		1532.83	4.92	19.89	5.77		14.4	4.92		153225	207.18	7.6	525874	<0.14	26.36	0.19	2.23	3.83	0.91	16.93	4.51	51.83	19.19	87.35	20.02	201.62	39.66	11439	266.16	215.3	0.345488
19-12-14-77	0.1	16.2	16	14.5		2730.08	8.51	48.5	10.18		16.2	8.51		153225	195.57	6.96	378896	<0.45	22.44	<0.38	2.84	4.63	1.25	16.06	4.63	51.01	16.76	79.87	16.72	160.47	34.62	8251.29	304.38	216.14	0.443166
19-12-14-78	140.5	62.4	64.3	57.2		203.72	2.03	5.4	4.06		62.4	2.03		153225	413.99	2	465128	<0.263	9.87	<0.266	<1.34	1.93	0.328	13.03	5.33	78.38	32.54	169.19	37.26	360.23	73.75	11208.8	422.86	897.96	0.19996
19-12-14-79	1547.9	1483.4	1507.8	1401.7		28.77	17.09	9.6	22.95		1547.9	28.77		153225	323.66	14.78	467562	<0.174	14.51	<0.137	2.02	4.02	0.26	23.05	8.08	105.62	40.91	200.05	40.94	373.9	72.66	10403.4	196.2	293.8	0.0825742
19-12-14-80	970.7	844.4	878.2	808.1		26.91	8.4	6.15	14.37		844.4	8.4		153225	739.83	37.28	450677	0.66	44.65	2.49	18.32	24.73	10.21	99.62	33.52	356.43	110.16	479.53	94.76	820.94	146.93	14615	652.42	2122.46	0.628869
19-12-14-81	1835.9	1802.9	1815.7	1763.1		35.4	26.61	13.25	55.63		1835.9	35.4		153225	242.1	7.85	463736	<0.240	4.49	<0.218	1.55	2.82	0.133	17.42	5.42	66.65	24.31	114.43	22.59	205.97	40.08	8815.18	78	242.96	0.0580126
19-12-14-82	1251.3	1127.6	1168.6	1158.3		72.59	24.34	22.69	36.8		1251.3	72.59		153225	228.14	14.25	462716	<0.189	7.6	<0.251	<1.43	2.43	0.229	14.5	4.99	56.62	21.91	98.25	19.39	171.11	32.73	9710.21	64.64	95.28	0.117942
19-12-14-83	1427.3	1401.4	1409.4	1327.2		32.94	17.5	10.65	25.83		1427.3	32.94		153225	266.22	4.39	455100	<0.252	30.17	<0.238	<1.43	1.42	0.22	8.63	3.57	48.88	21.17	115.02	27.52	289.05	64.69	11506.1	185.16	334.31	0.192129
19-12-14-84	0.1	52.5	47.1	42.6		715.05	6.03	22.26	7.69		52.5	6.03		153225	247.53	6.63	453284	<0.55	39.72	<0.40	<2.08	4.23	1.29	19.77	6.62	83.66	32.91	166.62	38.34	371.12	78.92	8534.16	248.51	258.16	0.431256
19-12-14-85	0.1	54	45.8	46		686.2	7.83	24.34	24.1		54	7.83		153225	151.24	2.29	521455	<0.168	7.19	0.115	<0.65	0.8	<0.092	5.53	1.84	29.44	12.92	69.01	16.14	182.81	40.91	10816.1	58.39	179.27	n.a.
19-12-14-86	1657.4	76.3	156.5	90.9		237.88	4.72	18.12	4.91		76.3	4.72		153225	535.51	<3.49	312095	<0.57	48.61	0.7	8.63	12.93	1.68	65.05	19.31	220.34	79.32	354.91	68.23	589.39	117.85	5282.22	811.07	477.46	0.177095
19-12-14-87	415	55.7	64.6	55.5		182.01	2.11	4.86	2.5		55.7	2.11		153225	343.24	2.55	431851	<0.265	17.35	0.39	6.06	13.35	0.795	80.32	25.47	306.68	107.67	485.91	92.66	807.03	154.27	8399.03	730.98	895.55	0.0742222
19-12-14-88	247.7	63.3	68.1	61.6		711.94	4.45	25.25	12.23		63.3	4.45		153225	418.71	4.41	454179	0.156	9.66	<0.57	<5.95	3.4	<0.46	21.35	7.34	95.54	37.75	177.47	36.92	335.73	66.25	10221.5	199.51	419.33	n.a.
19-12-14-89	1238.1	45.1	77.1	40.7		383.56	5.02	14.32	5.8		45.1	5.02		153225	271.34	34.77	492714	<0.22	27.96	0.199	3.11	5.32	2.2	26.08	7.74	94.02	35.77	179.41	39.88	405.73	86.58	8906.69	272.95	254.59	0.570995
19-12-14-90	611	574.5	580.6	550.7		81.17	11.19	15.04	12.31		574.5	11.19		153225	316.63	10.71	497068	<0.215	25.97	1	13.08	17.4	2.67	61.32	15.5	148.83	45.54	178.06	31.24	262.76	45.44	9710.01	237.05	221.05	0.249894
19-12-14-91	695.2	660.6	667	636.8		161.23	25.43	34.6	29.95		660.6	25.43		153225	311.54	13.78	381380	<0.33	19.99	0.9	11.9	13.69	2.27	50	12.22	117.91	34.7	130.25	23.35	191.16	34.82	7629.01	160.13	156.78	0.265252
19-12-14-92	169.5	46.5	48.8	46.1		682.56	4.03	16.84	8.97		46.5	4.03		153225	130.82	1.82	460876	<0.226	17.37	<0.213	<1.29	0.65	0.209	4.77	1.6	23.55	10.51	63.03	16.18	187.38	47.3	11139.9	161.17	259.85	0.362869
19-12-14-93	202.1	94.1	98	82.4		997.42	15.96	53.52	13.67		94.1	15.96		153225	241	7.91	513569	<0.211	10.5	<0.200	1.63	2.77	1.031	19.21	6.08	70.37	26.28	123.95	25.86	240.91	47.28	10361.9	120.05	73.71	0.43209
19-12-14-94	1726.4	1713	1716.5	1631.5		54.61	36.22	20.31	54.4		1726.4	54.61		153225	313.05	4.59	431598	<0.283	3.61	<0.200	2.48	4.17	0.43	23.93	6.77	80.02	29.02	127.48	24.27	208.93	41.38	8650.97	62.46	100.08	0.131598
19-12-14-95	337.6	61.4	68.7	60.8		376.15	3.32	11.9	4.75		61.4	3.32		153225	312.41	16.72	460660	<0.254	16.72	<0.184	1.42	3.19	0.519	17.77	6.25	76.49	29.16	142.89	29.43	270.08	54.6	9783.38	288.07	347.6	0.21074
19-12-14-96	0.1	53.2	49.1	50		687.66	4.51	20.46	8.87		53.2	4.51		153225	511.63	3.46	468297	<0.227	40.49	<0.186	1.63	3.22	0.771	19.98	6.94	90	36.53	182.84	40.13	390.84	81.44	9929.1	228.55	290.95	0.293865
19-12-14-97	122.2	139	137.7	130.3		70.73	2.2	3.46	2.61		139	2.2		153225	367.45	4.39	451625	<0.264	29.12	<0.272	1.85	4.6	0.13	29.53	10.64	137.22	53.3	257.58	52.68	463.34	87.1	11469.2	1314.69	1596.19	0.0340998
19-12-14-98	356.2	46.7	53	50.9		603.11	4	16.18	5.01		46.7	4		153225	294.21	11.64	457441	<0.226	36.52	<0.195	2.38	3.72	1.45	18.28	6.2	79.21	31.33	160.88	35.24	342.27	73.25	7857.41	241.8	238.02	0.537561
19-12-14-99	0.1	64.5	61.9	69.2		1622.34	16.38	70.21	21.06		64.5	16.38		153225	294.88	6.75	428033	<0.20	18.01	<0.196	3.14	3.61	1.15	19.02	5.08	59.31	21.84	100.23	20.2	180.99	37.8	7708.39	86.41	72.86	0.424286
19-12-14-100	0.1	47.3	44.9	47.5		742.52	4.57	18.56	4.76		47.3	4.57		153225	273.05	6.56	437920	<0.260	68.09	<0.200	2.45	4.44	1.57	22.07	6.3	73.69	27.2	126.96	26.24	238.99	48.89	8628.27	278.61	178.17	0.484871
19-12-14-101	200.8	43.6	46.4	38.2		1543.52	10.09	50.16	11.59		43.6	10.09		153225	258.87	18	461385	<0.244	20.56	<0.197	1.39	2.97	0.712	15.02	4.74	54.15	19.43	89	17.98	168.36	34.48	8835.22	119.22	87.49	0.325901
19-12-14-102	125.8	45.5	46.9	51.1		414.81	3.35	8.59	5.32		45.5	3.35		153225	238.99	3	510010	0.32	43.75	<0.121	0.92	2.31	0.548	13.19	4.65	60.58	25.55	135.01	33.44	358.23	77.65	11918.6	302.11	427.73	0.303509
19-12-14-103	936.1	724.7	776.9	827.2		164.96	29.13	41.11	42.08		724.7	29.13		153225	629.83	56.09	515100	<0.19	3.67	<0.20	<1.21	2.58	<0.113	18.17	5.71	76.58	28.66	134.37	26.45	248.86	48.05	11761.9	63.57	62.47	n.a.
19-12-14-104	1595.4	43.4	88.8	52.1		366.66	4.56	16.7	9.02		43.4	4.56		153225	351.42	32.42	456175	<0.240	8.15	<0.232	1.95	3.69	0.664	21.39	7.25	92.29	35.21	174.11	35.76	332.23	68.68	8863.67	143.81	232.17	0.228491
19-12-14-105	0.1	84.4	79.9	86.3		234.18	3.05	9.27	4.69		84.4	3.05		153225	152.53	2.09	457907	<0.223	35.49	<0.249	<1.24	2.09	0.832	10.37	3.27	41.2	17.01	91.44	21.46	241.77	59.3	10520.7	590.14	542.96	0.546362
19-12-14-106	0.1	45.8	44.7	37.4		1155.22	5.94	30.36	7.26		45.8	5.94		153225	231.41	6.26	461841	<0.228	44.81	0.35	6.25	9.02	3.59	39.13	11.42	127.14	45.07	210.83	43.24	408.39	84.97	8369.22	188.14	135.36	0.584192
19-12-14-107	0.1	64.9	60.3	76		487.09	4.43	16.75	8.22		64.9	4.43		153225	297.98	8.31	473278	<0.224	14.25	<0.191	1.13	2.5	0.993	14.32	5.07	70.51	29.83	158.65	37.49	397.96	92.24	9457.68	152.76	254.14	0.507373
19-12-14-108	868.8	50.3	71.8	46.3		362.54	3.23	12.92	3.29		50.3	3.23		153225	1115.39	14.87	461878	8.01	80.18	2.42	13	9.03	3	38.64	11.58	136.14	49.4	238.86	50.75	481.54	99.22	8391.42	499.68	328.75	0.490996
19-12-14-109	1477.2	49.3	94.5	51.6		370.37	4.73	18.01	8.94		49.3	4.73		153225	3468.49	7.5	462581	19.1	61.31	6.28	27.96	7.52	0.782	17.39	5.14	63.82	25.1	130.82	28.57	277.04	60.23	9764.01	139.9	196.46	0.209058
19-12-14-110	0.1	33.4	30.5	32.3		44.12	1.07	2.84	3.62		33.4	1.07		153225	255.24	3.38	448591	<0.196	36.93	<0.210	<0.98	1.31	0.349	7.36	2.5	36.99	16.92	107.85	30.3	361.86	88.93	12064.7	354.96	1429.87	0.343614
19-12-14-111	243.2	123.8	129.5	115.7		104.97	2.68	5.14	3.2		123.8	2.68		153225	333.47	2.1	446069	<0.220	24.75	<0.187	1.81	4.18	0.759	26.23	8.93	113.6	45.28	230.54	49.81	483.19	103.03	10563.2	885.59	951.94	0.221602
19-12-14-112	1565.3	1436.3	1486.8	1392.5		26.99	15.59	8.98	23.31		1565.3	26.99		153225	333.79	16.16	450454	<0.222	11.01	<0.197	<1.19	1.94	0.119	13.83	5.19	70.8	28.58	142.64	29.32	273.09	52.82	10684.7	176.45	323.89	0.0702351
19-12-14-113	286.5	61.7	67.5	59.9		114.49	1.45	3.04	2.7		61.7	1.45		153225	941.23	1.31	447494	<0.197	9.02	<0.170	<1.03	4.03	0.43	34.14	14.49	203.68	83.83	422.28	89.57	826.18	163.14	10801.2	623.91	1480.3	0.112074
19-12-14-114	0.1	65.9	60.1	58.3		97	2.17	6.23	4.65		65.9	2.17		153225	359.5	1.97	490513	<0.189	7.67	<0.211	<0.94	1.59	<0.109	15.6	6.76	99.33	41.18	212.61	45.89	440.49	86.39	13543.6	300.59	709.3	n.a.
19-12-14-115	128.3	76.6	78	75.4		221.29	2.68	7.11	4.32		76.6	2.68		153225	419.77	5.26	452040	<0.182	13.36	0.296	4.96	7.83	1.62	44.09	14.47	175.77	65.24	299.11	59.4	527.4	104.29	9104.85	515.29	735.36	0.266553
19-12-14-116	14.7	49.1	48.2	45.1		802.56	4.32	19.93	5.11		49.1	4.32		153225	288.98	11.36	418312	<0.29	13.52	0.36	7.12	12.14	5	59.97	17.18	193.43	67.2	313	63.38	590.16	116.42	6489.01	258.48	198.26	0.566517
19-12-14-117	287.5	67.4	73.6	80.5		846.86	8.91	33.43	14.43		67.4	8.91		153225	370.36	12.45	463715	<0.214	13.22	<0.195	1.89	4.31	1.017	22.62	8.16	106.21	41.62	201.23	40.65	364.63	74.3	8343.45	142.61	160.86	0.314888
19-12-14-118	4	48.9	47.9	48.9		402.15	2.52	8.52	3.93		48.9	2.52		153225	161.92	3.41	456205	<0.30	33.32	<0.261	<1.14	1.43	0.488	9.04	3.19	44.47	20.26	112.2	27.6	306.66	74.51	10159.2	391	506.43	0.414942
19-12-14-119	226.2	105.8	110.7	124.3		128.22	2.67	5.49	5.39		105.8	2.67		153225	243.32	4.63	466577	<0.245	13.05	<0.191	<1.11	1.64	0.283	8.3	3.29	42.94	19.33	109.81	26.18	280.65	64.17	10954.3	352.96	917.52	0.234501
19-12-14-120	199.1	48.9	51.9	57.9		497.22	4.08	11.97	6.62		48.9	4.08		153225	347.09	3.12	439273	<0.31	17.54	<0.227	1.5	3.65	0.725	19.2	6.99	95.01	38.33	200.3	44.44	422.75	91.81	10350.5	376.51	508.86	0.264765
19-12-14-121	241.9	45.3	49	44		155.16	1.26	3.12	1.13		45.3	1.26		153225	219.39	9.56	430484	<0.239	98.09	<0.208	2.22	3.99	1.24	22.64	7.5	91.06	37.33	198.49	46.64	495.93	113.89	9452.79	2347.15	1560.05	0.398856
19-12-14-122	259.8	65.2	70.4	66.6		329.16	3.11	10.32	5.55		65.2	3.11		153225	269.25	2.74	445909	<0.231	13.71	<0.182	1.16	1.97	0.313	12.53	4.82	65.89	27.14	136.88	30.42	288.42	60.6	10082.9	255.95	368.2	0.192599
19-12-14-123	0.1	61.2	53.6	67.2		662.03	7.88	24.8	11.33		61.2	7.88		153225	236.4	4.68	505999	<0.192	14.54	<0.197	2.51	4.93	0.96	27.37	8.51	104.05	39.84	183.73	37.43	329.54	64.62	10188.3	145.65	180.35	0.252656
19-12-14-124	418.4	47.2	55.1	45.6		230.07	1.87	5.55	1.25		47.2	1.87		153225	376.49	4.24	446720	<0.30	215.94	0.86	14.78	24.4	6.96	104.83	28.43	313.7	108.61	491.74	98.6	902.77	179.08	8353.21	2286.34	823.48	0.420718
19-12-14-125	0.1	40.2	35	42.9		1376.87	7.67	39	7.9		40.2	7.67		153225	228.46	9.76	449952	<0.244	35.19	0.57	7.65	10.71	4.94	46.86	11.89	132.3	44.31	199.7	40.86	370.06	76.54	7275.48	161.83	102.08	0.674141
19-12-14-126	0.1	53.3	48.9	59.7		318.94	2.79	10.27	4.69		53.3	2.79		153225	217.8	3.12	450933	<0.31	19.84	<0.176	<1.59	1.18	0.322	9.67	3.51	47.87	20.08	109.22	25.53	252.87	56.92	10621	323.67	453.09	0.291421
19-12-14-127	32.1	78.8	77.1	60.1		139.77	1.88	4.17	1.91		78.8	1.88		153225	249.57	7.48	414943	<0.34	65.55	0.26	4.23	7.09	2.23	38.36	10.2	105.31	33.97	159.94	34.32	365.42	86.91	9528.85	2258.16	1394.81	0.413392
19-12-14-128	380.4	26.6	30.8	25.4		397.09	1.75	5.76	2.65		26.6	1.75		153225	81.19	8.95	436047	<0.224	22.64	<0.195	<1.24	1.4	0.405	5.02	1.39	14.82	5.68	29.88	6.87	77.72	18.89	11476.3	598.12	884.48	0.467045
19-12-14-129	313.7	53.6	59.5	42.4		1814.67	16.94	85.52	22.12		53.6	16.94		153225	171.85	12.67	459681	<0.213	15.31	0.262	3.21	4.9	2.14	19	5.14	55.63	19.28	87.95	18.05	175.95	37.53	7313.69	57.05	43.16	0.678045
19-12-14-130	1631.6	59.8	122.8	94.8		240.61	4.94	13.17	9.4		59.8	4.94		153225	100.03	<1.19	520468	<0.14	5.33	0.17	1.36	2.36	0.98	9.36	2.84	34.96	12.64	64.64	14.78	164.12	37.02	10275.4	97.84	121.35	0.637458
19-12-14-131	0.1	46.8	43.7	35		722.88	4.1	18.63	5.98		46.8	4.1		153225	270.15	9.56	454648	<0.298	39.23	<0.258	3.54	5.36	2.07	27.38	8.33	104.2	40.53	205	44.5	442.13	93.25	7833.57	256.97	235.56	0.522385
19-12-14-132	0.1	46.8	44.4	48.4		1185.38	8.19	33	16.81		46.8	8.19		153225	283.44	7.89	457298	<0.246	8.92	<0.214	<1.26	3.21	0.817	22.34	7.71	97.7	37.38	180.64	37.17	337.59	69.83	9658.36	78.4	128.1	0.294949
19-12-14-133	332.4	56	62.7	53.7		838.46	6.38	28.81	14.14		56	6.38		153225	236.31	5.94	464726	<0.219	9.7	<0.162	<1.00	2.93	0.595	21.47	7.6	95.4	36.44	172.33	35.49	318.49	63.66	10184.9	79.25	116.13	0.229344
19-12-14-134	213.9	11.1	12.1	10.7		377.82	0.57	2.12	0.91		11.1	0.57		153225	348.64	2.23	428978	<0.242	35.66	<0.223	1.82	5.01	0.559	29.68	9.52	111.77	40.28	179.22	35	317.13	58.55	13804.9	1074.1	1622.73	0.140146
19-12-14-135	420.7	47.5	55.5	63		1015.14	7.26	33.49	18.01		47.5	7.26		153225	105.91	2.01	457620	<0.31	14.65	<0.208	<1.31	<0.55	0.281	4.31	1.45	18.9	8.15	45.45	10.77	119.47	27.45	10606.2	72.53	131.44	n.a.
19-12-14-136	121.2	166.4	163	159.4		77.25	2.78	4.47	3.36		166.4	2.78		153225	496.4	3.64	448685	<0.233	105.52	<0.234	1.47	4.5	0.46	33.78	13.66	183.95	76.84	398.06	87.21	841.34	173.45	10403	980.56	1196.92	0.114062
19-12-14-137	0.1	44.3	38.1	40.2		260.33	2.62	10.04	2.46		44.3	2.62		153225	352.26	7.12	451098	<0.243	98.47	0.49	7.77	13.88	4.49	61.73	18.63	211.33	75.48	353.43	72.3	668.06	134.33	7864.27	653.17	411.98	0.468946
19-12-14-138	92.9	44.3	45.1	43.6		270.74	2.22	5	2.95		44.3	2.22		153225	288.84	7.91	445601	0.85	22.77	0.214	1.38	1.76	0.374	12.98	4.53	62.49	25.87	137.82	30.68	305.17	65.72	10480.8	444.36	627.47	0.23922
19-12-14-139	431	48.1	56.4	46.2		179.15	1.69	4.25	3.55		48.1	1.69		153225	725.98	1.73	453187	<0.213	36.54	<0.184	<0.99	1.67	0.168	17.02	6.96	104.38	45.06	244.11	55.8	557.25	113.61	13176	433.16	988.84	0.0963365
19-12-14-140	33.1	115.6	111.6	103.6		211.33	3.61	9.4	18.21		115.6	3.61		153225	700.46	4.59	454789	<0.260	1.08	<0.243	<1.28	2.44	0.148	17.19	7.39	100.19	40.11	202.56	43.33	406.35	78.27	11666.5	73.59	459.04	0.0698632
19-12-14-141	195.7	11.2	12	15.7		1026.21	2.09	7.07	4.07		11.2	2.09		153225	77.92	3.87	508758	<0.117	36.71	<0.122	0.87	1.75	0.791	6.73	2.03	21.13	7.92	40.64	9.52	105.07	24.66	10621.5	389.87	579.95	0.704643
19-12-14-142	11.5	50.3	49.4	41.8		579.35	3.32	13.58	5.16		50.3	3.32		153225	275.46	6.97	445295	<0.266	38.61	<0.190	2.12	2.53	0.915	13.02	4.31	49.21	18.25	90.32	19.07	189.6	40.98	9321.14	264.58	279.85	0.487388
19-12-14-143	175	64.8	67.6	76.5		672.04	5.98	22.61	8.28		64.8	5.98		153225	274.29	6.91	456202	<0.257	10.59	<0.237	3.54	6.07	1.08	32.57	10.52	128.16	47.1	218.91	42.53	372.24	71.91	8864.28	187.91	191.65	0.234823
19-12-14-144	0.1	48.7	42.4	49.2		166.02	2.37	8.37	2.19		48.7	2.37		153225	270.44	3.88	451153	<0.30	60.74	0.196	2.9	5.56	1.55	27.98	9.47	119.28	47.95	246.58	55.78	555.66	118.91	8708.37	910.75	545.5	0.379918
19-12-14-145	0.1	45.5	42.4	39.1		510.82	3.44	12.61	5.9		45.5	3.44		153225	1277.05	2.27	503835	15.57	42.42	2.86	9.85	3.42	0.326	8.48	3.1	39.24	16.64	90.03	22.13	227.82	53.88	12315.9	211.56	364.65	0.185066
19-12-14-146	101	46	47	34.8		1615.11	9.25	53.73	15.97		46	9.25		153225	248.73	15.84	460294	<0.275	27.28	<0.250	1.99	3.24	1.47	15.01	4.55	53.92	21.22	106.13	22.94	227.41	48.46	7428.19	99.08	94.23	0.644427
19-12-14-147	343.4	46.2	52.2	44.4		471.6	3.02	11.89	3.09		46.2	3.02		153225	323.48	6.87	455959	<0.270	62.16	0.457	6.7	11.22	3.99	47.35	13.67	155.28	54.28	260.91	54.68	522.55	105.75	8343.83	507.89	323.93	0.52922
19-12-14-148	1197.3	1131.2	1151.9	1077.6		42.11	16.32	12.14	27.4		1197.3	42.11		153225	309.39	8.02	467654	<0.196	4.17	<0.207	<1.39	2.04	<0.128	14.63	5.37	69.72	27.37	131.7	27.53	240.15	47.45	11011	106.62	237.39	n.a.
19-12-14-149	68	39.4	39.8	37.1		237.66	1.36	3.96	2.31		39.4	1.36		153225	134.18	2.28	454582	<0.259	26.69	<0.194	<1.28	2.33	0.996	14.18	4.56	57.7	21.84	107.96	24.06	234.92	49.63	11222	814.62	1312.65	0.52974
19-12-14-150	948.9	925.6	930.7	909.3		77.67	21.08	20.03	28.53		925.6	21.08		153225	419.14	3.68	455613	<0.241	5.53	<0.245	2.27	4.63	0.301	26.53	7.91	91.64	32.26	140.28	26.6	227.72	42.99	9512.71	135.33	184.05	0.0830284
19-12-14-151	309.1	49.9	55.4	23.1		926.33	5.86	29.12	8.97		49.9	5.86		153225	79.01	1.97	458028	<0.31	15.99	<0.222	1.63	2.06	1.18	9.97	2.95	35.37	13.73	68.62	15.55	153.47	34.46	7841.24	165.57	146.28	0.796013
19-12-14-152	0.1	59.6	57.4	55.3		334.74	2.68	9.02	2.56		59.6	2.68		153225	451.06	6.14	452091	<0.253	20.91	0.83	11.24	14.55	4.08	56.03	16.65	188.42	66.62	325.83	70.23	676.59	142.42	7772.44	817.97	515.56	0.436856
19-12-14-153	0.1	58.1	51.6	59.3		0	1.64	4.28	2.1		58.1	1.64		153225	194.52	3.31	446365	<0.262	64.37	<0.215	<1.13	1.78	0.263	9.3	3.6	50.49	22.84	137.73	35.11	399.27	96.35	11017.1	1041.95	1192.92	0.197617
19-12-14-154	198.7	46.2	49.1	43.2		118.13	1.3	2.15	1.04		46.2	1.3		153225	498.98	16.29	472198	0.15	301.09	0.76	9.67	16.51	4	79.22	25.94	331.84	135.65	741.86	174.77	1836.2	414.19	9429.07	6561.27	3579.13	0.338134
19-12-14-155	133.5	119.5	119.9	116.9		88.93	2.23	3.91	3.65		119.5	2.23		153225	278.13	3.49	449553	<0.232	18.46	<0.201	1.82	5.98	0.214	42.02	14.49	186.19	69.31	312.79	59.63	506.09	92.91	9603.84	661.47	1357.13	0.0412719
19-12-14-156	77.4	50.8	51.3	49.4		551.55	3.48	13.37	4.34		50.8	3.48		153225	248.84	5.47	466920	<0.245	42.01	<0.199	1.97	3.54	2.42	23.29	8.31	108.47	43.18	220.46	50.82	516.05	112.61	7875.72	403.43	344.5	0.814795
19-12-14-157	1587.3	1640.4	1614.8	1494.8		28.6	18.81	9.97	22.71		1587.3	28.6		153225	292.8	3.87	453153	<0.222	13.61	<0.218	1.33	3.08	0.386	19.39	6.73	90.93	36.37	178.63	36.59	335.61	65.25	9341.85	205.65	250.1	0.152701
19-12-14-158	1251.1	59.5	101.2	63.9		379.36	5.18	19.48	7.54		59.5	5.18		153225	515.02	6.37	454911	<0.286	10.12	0.351	4.23	8.03	1.58	41.96	13.02	154.4	56.03	257.47	49.67	434.29	83.77	8160.5	183.22	183.21	0.263149
19-12-14-159	286.5	45	49.7	40.9		632.93	3.81	15.95	3.92		45	3.81		153225	268.22	7.65	454680	<0.255	68.53	0.59	9.93	14.81	4.71	60.29	17.25	193.75	66.01	302.86	61.89	564.91	112.34	7669.14	403.8	256.88	0.481881
19-12-14-160	143.3	61.4	63.3	59.3		88.54	1.14	2.11	1.38		61.4	1.14		153225	739.81	3.85	445448	<0.203	27.44	<0.176	1.8	8.19	1.07	66.73	24.91	324.28	123.48	590.41	119.43	1059.14	204.51	9980.16	2050.32	2639.09	0.139927
19-12-14-161	77.7	104.4	103	93.7		56.46	1.35	2.04	1.27		104.4	1.35		153225	592.44	6.68	485823	0.44	52.68	0.47	6.46	12.99	1.88	83.01	29.47	372.87	139.86	659.98	134.87	1211.37	230.44	10054.7	5792.16	4738.78	0.175028
19-12-14-162	269.6	53.9	58.8	48.4		686.49	5.54	20.55	4.36		53.9	5.54		153225	476.47	11.83	408748	<0.32	65.46	1.19	18.44	24.69	9.56	90.95	24.27	250	83.29	373.04	74.79	678.76	133.46	6685.14	558.72	279.73	0.616759
19-12-14-163	93.2	47.1	47.9	45.2		141.05	1.17	2.65	1.05		47.1	1.17		153225	189.46	4.77	446496	<0.230	93.81	<0.223	1.82	3.3	1.15	18.22	5.71	73.38	30.54	165.72	41.6	472.07	114.34	10518.3	2754.18	1864.6	0.453405
19-12-14-164	129.7	73	74.5	76.5		766.1	8.31	28.81	7.93		73	8.31		153225	218.36	8.14	455304	<0.220	27.96	0.5	8.06	9.86	2.54	36.56	9.95	105.45	36.48	161.06	31.39	276.41	54.61	7899.58	229.23	147.28	0.408989
19-12-14-165	224.2	129.2	133.8	119		186.57	4.16	9.97	3.73		129.2	4.16		153225	247.25	3.34	473936	<0.248	16.01	0.282	4.1	5.39	1.69	25.3	7.76	90.82	35.65	181.79	40.89	416.01	88.92	10923.4	589.6	397.35	0.442437
19-12-14-166	639	42.6	55	34.1		414.77	3.42	11.02	4.25		42.6	3.42		153225	463.9	6.36	471605	0.207	124	0.29	5.25	11.32	3.59	60.09	18.81	228.73	82.25	373.94	74.17	655.78	124.72	8613.42	451.23	409.95	0.420813
19-12-14-167	132.3	58.9	60.6	57.1		1012.19	6.71	34.66	14.06		58.9	6.71		153225	261.65	10.27	468185	<0.221	12.91	<0.235	<1.45	2.14	0.306	12.92	4.57	55.74	21.07	103.74	22.42	207.2	42.17	10976.8	84.19	117.06	0.177911
19-12-14-168	0.1	43.5	36.5	40.1		0	1.54	3.1	1.47		43.5	1.54		153225	559.35	3.69	482819	<0.240	123.55	0.39	5.59	11.37	1.75	64.74	22.5	291.82	116.26	592.78	135.79	1372.85	287.03	10863.1	1942.91	1637.65	0.197193
19-12-14-169	172.5	61.5	64.2	59		160.74	1.71	4.17	2.01		61.5	1.71		153225	387.68	<1.89	454559	<0.35	22.31	0.27	5.38	13.27	0.69	86.01	29.02	347.51	127.01	568.64	107.02	901.66	165.4	9453.08	1182.92	1193.79	0.0624394
19-12-14-170	0.1	56.7	52.4	50.9		725.1	4.9	22.89	7.12		56.7	4.9		153225	343.43	18.34	459459	<0.31	11.81	0.266	3.43	6.57	1.21	35.67	11.42	131.32	47.37	213.81	42.11	366.86	71.28	8601.69	199.94	196.45	0.241641
19-12-14-171	141.6	61.1	63	63.4		715.65	6.79	22.44	9.2		61.1	6.79		153225	349.04	9.78	480110	<0.240	16.93	0.289	4.94	9.24	2.07	45.36	14.33	164.5	60.73	276.81	53.78	471.4	91.61	9323.97	204.07	183.76	0.309113
19-12-14-172	1723.1	1592.4	1647	1551.6		15.23	11.77	5.16	38.36		1723.1	15.23		153225	656.62	5.44	454821	<0.175	4.32	<0.164	<0.91	0.79	<0.092	8.32	4.61	79.97	37.89	224.65	59.05	644.11	141.23	14062.1	100.59	1603.21	n.a.
19-12-14-173	1625.9	1613.5	1616.4	1535.6		30.72	19.77	10.77	32.01		1625.9	30.72		153225	307.48	12.3	456063	<0.234	6.99	<0.191	<1.31	1.83	0.154	9.34	3.65	46.81	17.58	85.21	17.59	155.68	30.02	10590.3	108.66	228.21	0.113878
19-12-14-174	1460.4	77.7	144.3	78.6		975.82	22.59	89.4	24.18		77.7	22.59		153225	303.01	11.63	418944	<0.31	13.43	0.58	7.79	8.81	2.46	37.49	10.12	108.44	37.51	163.61	31.73	272.96	52.93	7429.07	107.1	73.47	0.413818
19-12-14-175	0.1	60.7	53.6	60.6		305.38	3.8	13.15	3.68		60.7	3.8		153225	401.5	7.68	439409	<0.222	16.16	0.36	5.91	9.24	2.2	48.3	15.06	174.46	63.19	280.33	53.81	458.91	88.74	8152.08	209.16	163.36	0.31837
19-12-14-176	1103.3	1100.6	1099.5	1083.5		118.8	33.08	37.11	48.37		1103.3	118.8		153225	373.51	12.03	461500	<0.230	25.86	<0.264	<1.55	2.54	0.184	17.71	5.86	70.3	24.61	104.71	19.97	181.28	37.63	12275.6	45.33	49.56	0.0838709
19-12-14-177	58.8	65.6	65.2	68.3		252.3	2.89	6.67	2.48		65.6	2.89		153225	289.51	3.37	473675	<0.240	26.25	<0.183	1.56	3.34	0.447	21.03	8.02	104.5	40.47	206.95	44.15	412.03	82.11	10781.1	1118.87	671.93	0.163055
19-12-14-178	436	47.5	55.8	53.3		620.82	4.13	17.93	6.15		47.5	4.13		153225	310.55	4.79	455757	<0.233	49.29	0.253	4.41	7.74	2.43	33.4	10.35	119.72	43.84	206.78	43.04	406.28	84.18	9014.9	252.17	231.42	0.462043
19-12-14-179	116.1	59.7	60.9	59.3		227.81	2.11	5.77	4.5		59.7	2.11		153225	363.31	3.55	449447	<0.224	12.27	<0.246	<1.27	2.23	0.32	16.49	7.19	105.02	45.63	242.09	54.22	513.77	105.43	11389.1	467.72	1011.5	0.161327
19-12-14-180	548.1	113.4	135.4	117.6		70.26	1.99	3.6	3.16		113.4	1.99		153225	6171.04	3.96	435908	116.34	413.75	69.08	373.12	126.22	1.35	188.89	38.59	348.71	111.07	460.37	82.74	674.3	120.98	9527.35	866.91	1661.44	0.0267291
19-12-14-181	306.6	64	70.6	59.3		181.73	2.13	5.33	4.08		64	2.13		153225	1058.46	2.35	457060	<0.228	6.35	<0.190	1.9	5.86	0.393	44.55	16.95	224.2	88.28	415.82	82.74	718.15	137.76	12516.8	439.49	920.65	0.07436
19-12-14-182	163.2	63.5	66	59.1		110.65	1.41	2.81	1.84		63.5	1.41		153225	410.67	1.9	448835	<0.236	18.59	<0.204	1.58	5.79	0.346	44.45	17.11	231.26	89.88	424.95	85.16	737.63	139.31	12076	1256.53	1843.73	0.0659357
19-12-14-183	286.7	55.2	60.6	108.1		264.02	2.53	6.88	17.35		55.2	2.53		153225	162.61	1.34	464174	<0.128	2.33	<0.157	<0.77	0.61	0.112	3.4	1.48	19.8	8.74	43.85	10.3	107.97	25.06	10418.6	67.73	512.64	0.237757
19-12-14-184	0.1	47.5	45.5	46		496.16	3.11	11.6	3.13		47.5	3.11		153225	237.39	10.65	462881	<0.230	29.48	0.57	8.9	16.84	6.37	72.8	20.93	225.76	78.93	356.19	72.99	663.82	131.35	7753.16	523.81	348.32	0.556189
19-12-14-185	203.3	60	63.5	60		110.01	1.32	2.72	1.85		60	1.32		153225	649.44	<1.70	450596	0.274	16.71	0.241	2.26	6.4	0.266	50.06	19.78	261.94	101.26	488.61	97.35	845.97	160.13	11262	1359.74	2050.29	0.0454324
19-12-14-186	436.7	47.6	55.9	42.2		1052.88	7.49	35.64	17.61		47.6	7.49		153225	160.08	2.5	415979	<0.26	24.67	<0.28	<1.58	<0.67	<0.179	5.44	2	26.95	12.16	65.22	15.88	173.82	37.58	10165.7	109.32	179.3	n.a.
19-12-14-187	387.9	113.4	126.5	104.5		364.83	6.57	20.61	8.41		113.4	6.57		153225	305.01	1291.83	417823	<0.268	10.58	<0.26	4.24	7.64	0.674	38.87	12.56	147.12	51.36	231.1	44.4	375.79	71.27	8183.82	244.44	219.21	0.119571
19-12-14-188	0.1	50.5	44.5	43.2		626.86	4.43	19.84	4.68		50.5	4.43		153225	161.2	2.36	473436	<0.231	47.45	<0.235	<1.38	2.32	0.606	12.24	3.67	45.69	17.47	85.3	18.74	176.98	36.29	10500.1	339.82	205.55	0.347662
19-12-14-189	682.9	633.2	642.7	615.6		63.25	10.89	12.27	23.26		633.2	10.89		153225	213.96	4.11	454749	<0.207	5.57	<0.200	<1.14	1.98	<0.121	13.41	4.36	55.43	20.67	96.31	19.16	169.25	33.08	9934.62	87.41	294.07	n.a.
19-12-14-190	351	60.1	67.7	55.3		254.76	2.53	7.52	2.46		60.1	2.53		153225	304.57	5.16	453982	<0.247	30.82	0.98	15.47	24.36	2.84	109.47	29.83	323.85	109.39	478.24	90.51	753.99	142.7	7961.41	815.92	581.46	0.168132
19-12-14-191	508.5	42.3	51.5	54.7		923.46	6.04	27.8	9.29		42.3	6.04		153225	352.95	3.8	395321	<0.30	30.87	<0.32	2.32	3.66	0.85	20.98	7.27	90.81	35.33	180.06	39.44	363.73	75.03	8140.29	347.72	305.78	0.296548
19-12-14-192	241.3	15.3	16.8	16		2194.83	5.9	34.42	6.83		15.3	5.9		153225	208.86	8.48	464665	<0.268	21.52	<0.237	2.28	4.88	1.11	19.41	5.06	56.41	18.9	88.86	18.32	168.47	34.86	9806.67	194.23	135.6	0.348674
19-12-14-193	4136.8	5.8	56.5	6.9		1222.7	6.68	36.83	8.88		5.8	6.68		153225	360.05	10.09	494620	<0.149	12.7	<0.209	1.55	3.45	0.729	16.81	4.7	53.99	19.9	89.58	18.1	164.19	33.8	10027	143.83	107.65	0.292653
19-12-14-194	1192.1	43.9	73.3	48.6		782.88	7.38	34.79	7.07		43.9	7.38		153225	444	20.05	493942	1.54	49.5	0.66	5.84	5.75	2.39	25.51	8.48	98.36	38.05	182.62	37.78	358.18	74.27	7530.72	214.95	137.42	0.603293
19-12-14-195	1199.7	1110.8	1139.2	1004.1		218.43	55.78	74.85	61.14		1199.7	218.43		153225	309	34.44	460302	<0.31	4.47	<0.232	1.33	1.88	0.349	12.7	3.52	43.75	15.7	71.18	14.4	126.87	25.34	8267.73	28.46	21.48	0.218355
19-12-14-196	146.7	48.6	50.4	43.1		552.69	3.38	13.4	7.87		48.6	3.38		153225	275.17	3.88	448694	<0.274	18.24	<0.283	<1.47	1.96	0.199	13.26	4.95	64.96	26.55	140.23	30.39	305.4	63.48	10720	176.36	324.28	0.119336
19-12-14-197	166.4	62.7	65.3	63.6		277.03	2.72	7.72	4.1		62.7	2.72		153225	302.89	3.99	461464	<0.188	13.25	<0.170	1.3	3.85	0.601	24.45	9.13	119.47	46.55	227.26	47.06	433.76	87.07	10086.3	391.27	558.08	0.189376
19-12-14-198	516.4	467.4	474.7	448.8		44.41	6.05	6.36	6.88		467.4	6.05		153225	338.62	8.6	456711	<0.212	23.95	<0.180	1.94	4.88	0.45	28.19	10.15	132.63	52.17	247.46	51.74	469.12	91.56	11363.5	832.69	987.32	0.117294
19-12-14-199	0.1	47.1	43.1	45		246.95	2.46	7.7	2.84		47.1	2.46		153225	191.14	3.2	463050	<0.206	47.92	0.257	2.55	4.3	1.37	21.01	6.77	78.79	31.01	165.86	40.08	439.51	110.37	10802.4	633.06	606.29	0.440649
19-12-14-200	211.8	44.5	47.6	28.3		1884.68	12.95	72.19	19.61		44.5	12.95		153225	184.75	8.98	461225	<0.247	16.46	0.223	3.22	5.06	2.03	19.71	5.79	65.49	23.68	108.84	22.85	212.29	44.99	7599	70.53	58.65	0.621437
19-12-14-201	419	47.4	55.3	56		674.68	4.49	19.61	7.24		47.4	4.49		153225	518.24	5.26	433628	0.34	33.04	0.26	<1.76	4.01	1.45	20.29	6.4	80.78	31.35	157.64	36.83	345.84	74.01	7999.05	186.01	201.68	0.491444
19-12-14-202	361.2	51.6	58.6	55.6		650.64	6.43	19.02	7.79		51.6	6.43		153225	353.71	12.85	460099	<0.259	18.22	0.36	5.51	9.11	1.8	47.95	15.39	188.01	72.59	344.33	68.82	607.72	121.64	9478.32	271.33	231.88	0.263292
19-12-14-203	44.4	62.9	62.2	77.2		232.96	2.13	5.98	5.7		62.9	2.13		153225	258.92	<1.54	462706	<0.203	9.74	<0.167	<1.13	1.43	0.236	11.42	4.71	67.29	28.54	144.48	31.74	307.88	62.53	11714.9	313.18	839.29	0.178538
19-12-14-204	0.1	63.6	57.2	61.3		118.42	2.41	7.4	6.33		63.6	2.41		153225	511.93	2.13	460686	<0.257	9.23	<0.283	<1.57	3.46	0.48	21.43	8.57	113.66	46.03	232.08	50.05	466.04	94.03	10965.4	261.77	689.1	0.170416
19-12-14-205	347.8	54.1	61	57.8		1250.88	8.81	49.12	13.83		54.1	8.81		153225	286.46	12.81	461905	<0.231	23.71	<0.32	1.86	2.69	1.51	16.12	5.1	63.77	24.99	126.31	27.33	274.46	60.08	7179.57	95.34	90.82	0.701032
19-12-14-206	170.5	49.6	52	48.8		306.22	2.33	6.95	2.31		49.6	2.33		153225	436.43	8.89	433629	<0.23	54.14	0.26	4.17	7.64	3.01	45.33	14.73	173.25	63.69	296.15	58.62	529.72	106.52	7609.03	977.61	628.84	0.494477
19-12-14-207	882.1	770.4	798	744.1		95.12	18.84	22.99	26.02		770.4	18.84		153225	313.86	4.97	455559	<0.222	5.79	<0.228	1.73	4.06	0.433	22.25	7.15	81.91	28.54	127.18	24.19	210.48	39.58	9455.79	85.44	117.82	0.139277
19-12-14-208	0.1	27.3	24	26.5		1098.18	3.63	20.04	2.45		27.3	3.63		153225	241.08	21.4	457245	<0.29	33.72	1.15	14.67	20.42	5.74	59.98	12.94	110.76	29.74	108.8	17.91	141.41	24.54	8105.69	645.45	264.88	0.501418
19-12-14-209	229.8	47.2	50.8	43.1		263.2	1.92	5.81	2.09		47.2	1.92		153225	364.87	4.36	443190	<0.249	93.68	<0.245	1.74	4.76	1.05	30.25	10.49	134.4	52.48	257.42	55.93	531.58	106.8	9951.5	953.02	822.24	0.267512
19-12-14-210	757.4	579.9	616	668.9		373.52	37.7	87.57	58.21		579.9	37.7		153225	228.58	3.28	461224	<0.239	1.84	<0.212	<1.46	1.72	0.361	11.3	3.77	46.94	17.44	82.8	16.13	148.72	28.98	8613.36	22.2	27.97	0.250336
19-12-14-211	708.4	716.9	713.2	637.9		679.36	68.56	199.4	142.14		716.9	68.56		153225	268.64	<3.25	353008	<0.47	1.65	<0.49	<2.83	1.45	0.3	9.83	3.3	38.39	14.02	66.54	13.32	114.87	23.21	6455.32	18.41	24.85	0.242929
19-12-14-212	527.1	473.5	481.6	454.5		41.94	5.8	6.1	5.64		473.5	5.8		153225	614.26	8.44	461234	<0.223	41.64	0.38	4.96	8.63	0.509	48.62	18.12	228.49	87.32	412.38	84.46	744.51	142.3	11195.8	1258.67	1002.44	0.0759669
19-12-14-213	554.1	12.3	15.5	12.5		419.85	0.83	3.24	1.32		12.3	0.83		153225	129.45	2.55	448428	<0.207	50.56	<0.227	<1.29	3.42	1.26	17.79	5.43	60.87	23.06	117.19	26.08	259.26	58.31	10749	1059.8	1237.86	0.493843
19-12-14-214	708.1	597.3	619.5	584.3		88.86	13.83	17.2	17.17		597.3	13.83		153225	565.9	6.98	451668	<0.183	17.12	<0.182	2.06	4.27	0.84	22.02	7.21	80.95	28.35	131.3	26.11	231.48	46.56	10069.8	147.49	168.94	0.264835
19-12-14-215	201.4	82	85.8	96.8		96.84	1.73	3.12	12.36		82	1.73		153225	115.05	<1.41	449217	<0.214	10.84	<0.220	<1.35	2	0.86	10.34	2.99	36.61	14.85	75.31	16.22	164.67	39	11324	125.54	1529.54	0.578153
19-12-14-216	162.2	111.1	113.1	105		75.32	1.93	3.06	2.94		111.1	1.93		153225	379.75	3.12	473424	<0.153	15.74	<0.148	2.49	5.89	0.574	39.56	14.51	181.86	67.03	314.52	61.5	535.94	101.25	9527.56	922.75	1846.35	0.11496
19-12-14-217	163.2	48.8	51	49.4		290.99	1.38	6.65	3.54		48.8	1.38		153225	185.55	2.68	463701	<0.162	18.49	<0.097	<0.85	1.7	0.418	8.47	3.7	50.86	21.49	108.3	26.32	286.32	57.14	10526.9	354.14	524.82	0.336767
19-12-14-218	261	63.5	68.7	52.9		306.81	2.4	9.47	3.46		63.5	2.4		153225	274.19	7.51	470587	<0.181	19.88	0.161	2.75	5.12	0.985	24.31	8.76	106.92	40.55	180.89	38.14	369.11	68.38	8339.35	397.61	303.82	0.269916
19-12-14-219	215.4	47.7	51.1	43.4		388.89	1.76	9.29	4.11		47.7	1.76		153225	270.34	17.86	468801	<0.177	18.18	0.359	4.69	7.14	1.228	29.58	10.04	110.72	40.26	175.51	37.08	360.42	66.7	7729.66	269.91	289.97	0.258327
19-12-14-220	55.7	44.8	45	41.1		151.73	0.77	2.84	1.39		44.8	0.77		153225	319.68	3.28	461585	<0.174	94.9	0.16	3.22	6.98	1.127	35.32	14.06	173.08	71.03	352.58	82.57	868.41	165.64	10846	1225.61	1332.99	0.219435
19-12-14-221	126.4	116.5	116.8	116.9		503.4	5.03	27.27	11.7		116.5	5.03		153225	203.84	9.72	467359	<0.161	7.9	<0.137	<1.13	1.87	0.357	10.69	4.04	48.24	18.54	82.88	17.47	166.23	30.82	9091.16	75.84	90.08	0.244106
19-12-14-222	0.1	62.2	60.5	59.1		79.1	0.8	1.91	1.74		62.2	0.8		153225	353.84	1.69	467942	<0.200	15.31	<0.158	<1.03	3.1	0.287	30.41	14.16	192.55	80.88	388.34	87.17	855.93	158.28	11555	992.37	2044.35	0.0903675
19-12-14-223	0.1	50.8	48	49.4		56.24	0.84	2.75	2.01		50.8	0.84		153225	177.26	5.33	497709	0.44	49.44	0.178	1.63	3.1	0.712	16.97	6.13	72.8	28.34	127.98	30.06	318.76	60.74	10918.4	767.22	1319.88	0.300108
19-12-14-224	7.5	63.4	61.9	60.1		403.01	2.42	11.17	5.17		63.4	2.42		153225	298.88	3.73	469526	<0.209	24.45	0.214	4.2	6.99	1.81	36.61	12.6	150.91	59.32	268.64	59.32	597.05	115.54	8780.03	297.96	323.06	0.345907
19-12-14-225	165.5	48.3	50.6	46.6		130.72	0.8	2.77	1.75		48.3	0.8		153225	224.01	5	466694	<0.212	31.85	0.17	2.41	5.27	0.453	27.18	10.19	118.62	44.63	201.1	44.63	443.63	80.37	9861.11	868.03	1559.19	0.115714
19-12-14-226	143.5	127.7	128.2	126.5		71.38	1.62	3.51	6.18		127.7	1.62		153225	235.34	3.54	472013	<0.201	3.04	<0.153	<0.91	1.77	0.12	10.95	4.34	54.61	21.74	105.94	24.38	245.47	47.93	11163.8	190.87	992.67	0.0833311
19-12-14-227	117.2	52.5	53.8	47.6		553.76	2.35	14.49	5.38		52.5	2.35		153225	171.72	3.48	478213	<0.173	54.78	<0.195	1.3	2.7	0.772	13	5.17	61.53	25.5	123.43	28.8	305.21	61.35	9336.85	329.23	380.19	0.398367
19-12-14-228	0.1	39.4	33.7	53.3		1599.12	6.33	48.32	14.14		39.4	6.33		153225	163.33	9.58	485680	<0.176	27.05	<0.164	1.63	3.05	1.278	13.39	4.06	45.77	16.76	75.57	16.18	168.23	33.37	7420.31	59.68	56.58	0.611378
19-12-14-229	148.6	121	122.1	105.2		159.15	2.64	7.86	7.67		121	2.64		153225	122.93	1.93	487543	<0.156	12.25	<0.148	<0.97	1	0.332	6.1	2.5	36.08	15.94	85.73	23.13	269.23	60.56	12006.5	201.26	528.29	0.410953
19-12-14-230	162.2	60.1	62.6	64.2		545.89	3.16	16.56	11.16		60.1	3.16		153225	167.18	5.61	489312	<0.177	7.89	<0.168	<1.05	1.11	0.274	6.2	2.51	33.87	14.7	75.95	18.3	206.25	44.03	9982.71	108.39	203.87	0.31931
19-12-14-231	0.1	50.3	47	55.5		480.3	2.26	13.17	6.24		50.3	2.26		153225	127.93	5.31	482626	<0.216	20.9	<0.159	<1.14	0.96	0.308	5.58	2.22	29.58	12.4	66.1	16.16	190.13	42.64	9363.12	167.28	228.93	0.406834
19-12-14-232	175.6	45.7	48.2	46.5		431.15	1.84	9.79	3.37		45.7	1.84		153225	230.9	7.51	487147	<0.196	53.12	<0.178	2.32	4.11	1.387	19.71	6.69	81.44	31.88	146.91	33.22	339.48	64.35	8399.15	313.08	266.73	0.47112
19-12-14-233	32.3	61	60.2	59.5		391.85	2.27	10.6	4.15		61	2.27		153225	300.49	5.54	482197	<0.137	19.39	0.339	7.57	14.11	3.52	65.01	21.35	230.38	81.79	336.81	66.01	594.52	107.48	8328.22	316.28	285.69	0.355311
19-12-14-234	282.6	69.3	75.6	66.1		753.1	4.17	30.34	14.24		69.3	4.17		153225	340.47	9.84	487621	<0.132	10.11	<0.192	<0.96	2.13	0.372	12.18	4.9	60.7	25.01	116.6	25.68	254.21	48.16	9830.64	77.46	115.47	0.22328
19-12-14-235	281.5	44.3	48.9	46.9		766.81	3.56	20.18	5.39		44.3	3.56		153225	183.57	22.18	488880	<0.208	49.98	<0.188	4.19	7.51	2.45	34.35	10.95	120.69	44.25	194.09	40.75	403.23	78.22	8885.96	210.96	161.38	0.466339
19-12-14-236	45.3	59.9	59.5	60.7		104.5	0.89	2.48	2.65		59.9	0.89		153225	312.3	1.82	473816	<0.188	15.51	<0.179	1.13	3.56	0.567	24.09	10.49	142.89	58.91	281.17	63.06	637.05	120.9	10305.7	564.56	1559.76	0.18718
19-12-14-237	316	61.9	68.6	60.9		1088.02	5.89	45.26	15.47		61.9	5.89		153225	206.09	13.4	488383	<0.217	4.72	0.168	2.06	3.16	0.871	13.74	4.63	56.92	23.89	114.17	24.58	257.37	52.68	6568.75	66.25	82.98	0.404111
19-12-14-238	59.7	108.8	106.5	113.5		136.02	1.81	5.79	3.43		108.8	1.81		153225	288.54	7.96	480176	<0.253	16.19	<0.188	1.93	4.2	0.242	23.98	8.68	105.13	40.36	178.01	37.15	350.23	63.12	9971.09	485.76	572.39	0.07372
19-12-14-239	184.5	28.6	30.4	27.4		701.32	1.67	11.19	1.69		28.6	1.67		153225	150.55	17.21	480600	0.258	48.03	0.78	11.4	13.57	4.04	40.35	10.39	93.76	27.8	103.88	19.31	169.87	29.6	8807.68	835.37	327.93	0.527824
19-12-14-240	257.6	49.5	53.9	47.5		277.55	1.67	6.71	3.77		49.5	1.67		153225	100.47	3.71	502142	<0.173	33.57	<0.150	0.99	1.8	0.713	8.3	3.37	39.57	16.44	84.1	21.44	251.05	57.34	10270.7	351.02	526.76	0.563941
19-12-14-241	868.2	917.4	901.9	836.1		63.1	13.07	17.5	16.24		917.4	13.07		153225	258.54	16.64	484956	<0.218	4.17	0.137	2.43	4.94	0.209	20.76	6.37	65.39	22.25	90.48	17.88	161.15	28.52	10014.6	168.08	111.79	0.0630941
19-12-14-242	46.4	65.8	65.2	60.3		139	1.15	3.68	2.42		65.8	1.15		153225	339.07	1.76	482145	<0.241	12.32	<0.110	<0.93	2.57	0.298	19.08	8.23	107.57	45.01	215.11	48.12	477.59	92.15	10215.3	668.3	933.7	0.130101
19-12-14-243	19.4	48.1	47.4	43.8		422.48	1.76	9.16	2.83		48.1	1.76		153225	182.2	5.77	485951	0.171	35.68	<0.181	1.16	2.33	0.915	12.9	4.75	56.89	23	109.17	26.46	281.5	56.66	8936.64	363.71	296.39	0.510232
19-12-14-244	122.5	45.2	46.5	45.3		401.67	2.12	8.55	5.12		45.2	2.12		153225	201.07	3.65	523688	<0.136	30.14	<0.129	<0.86	1.54	0.363	9.35	4.22	55.78	24.17	130.24	33.7	387.9	82.27	10715.4	258.13	411.25	0.292456
19-12-14-245	44.9	52.1	51.9	75.8		153.72	0.91	3.3	33.97		52.1	0.91		153225	76.46	<1.26	483003	<0.195	0.86	<0.132	<0.92	<0.34	<0.106	0.92	0.692	13.22	7.7	52.22	16.03	208.21	50.78	14038.4	29.11	1212.03	n.a.
19-12-14-246	215.5	52.1	55.7	47		1120.41	7.04	37.4	11.8		52.1	7.04		153225	210.16	14.06	501026	<0.18	33.94	<0.166	2.38	3.85	1.5	15.41	5.53	63.61	24.65	113.34	23.89	254.46	50.4	7451.76	133.83	112.87	0.595359
19-12-14-247	182.2	59	62	59.9		97.85	0.87	2.48	3.01		59	0.87		153225	203.92	1.91	467154	<0.173	7.16	<0.175	<0.96	1.84	0.258	14.97	6.34	81.97	31.93	146.38	31.69	321.99	62.86	9748.71	432.21	1463.15	0.150286
19-12-14-248	228.1	170.8	174.4	160.9		212.22	4.5	15.25	8.79		170.8	4.5		153225	245.17	5.94	472528	<0.156	49.66	<0.180	1.27	3.24	1.529	20.45	8.12	108.44	48.57	243.22	57.51	611.7	126.98	7019.68	168.64	202.35	0.574259
19-12-14-249	0.1	44.3	37.9	35.5		904.38	3.59	26.77	7.92		44.3	3.59		153225	211.41	11.43	478064	<0.178	35.07	<0.161	2.02	3.86	1.73	16.99	6.14	75.81	31.22	150.35	33.9	360.57	72.54	7000.21	121.79	111.96	0.653093
19-12-14-250	248.3	49.4	53.6	48.7		367.48	1.9	9.15	5.69		49.4	1.9		153225	222.62	3.2	475135	<0.134	16.94	<0.157	<1.12	1.95	0.131	12.75	4.7	61.17	26.94	131.59	30.27	317.17	63.03	10227.1	167.64	311.56	0.080319
19-12-14-251	139.5	46.7	48.4	54.5		640.12	3.02	15.53	5.75		46.7	3.02		153225	285.54	7.4	478403	<0.243	35.6	0.193	3.48	5.56	2.14	25.99	8.76	99.12	37.95	173.33	38.16	389.14	75.46	8188.15	215.74	210.09	0.544243
19-12-14-252	179.8	62.3	65.3	57.5		230.07	1.64	6.51	3.49		62.3	1.64		153225	259.22	2.05	477685	<0.170	12.82	<0.142	0.99	1.91	0.862	12.29	4.8	60.89	26.33	134.74	32.61	363.28	80.18	10252.5	400.77	490.54	0.543919
19-12-14-253	159.2	53.7	56	52.4		292.04	1.84	7.24	4.06		53.7	1.84		153225	284.54	4.34	437402	0.34	18	<0.184	<1.29	1.62	0.426	11.5	4.41	60.07	25.18	126.21	30.09	309.55	65.72	9492.53	370.71	500.56	0.301733
19-12-14-254	250	129.8	136	117.3		335.08	4.02	20.26	10.55		129.8	4.02		153225	230.32	8.93	484448	<0.188	11.87	<0.155	1.5	2.77	0.35	15.17	5.81	66.65	25.45	114.45	24.28	234.34	43.61	9536.83	135.3	178.03	0.165065
19-12-14-255	218.6	48.5	52	46.6		86.47	0.7	1.83	1.57		48.5	0.7		153225	708.76	2.52	478622	<0.158	47.8	<0.125	1.34	4.4	0.205	28.02	12.52	172.57	74.25	380.42	91.66	964.6	188.55	12860.2	955.83	1794.93	0.0564434
19-12-14-256	814.3	44.5	62.1	41.6		268.21	1.74	8.11	1.88		44.5	1.74		153225	280.82	7.97	486673	0.239	149.91	1.33	21.65	31.78	13.45	112.53	32.58	323.7	106.4	426.01	84.44	789.66	142.6	7631.67	693.13	291.48	0.687592
19-12-14-257	139	117.2	118	110.2		77.34	1.49	3.55	4.84		117.2	1.49		153225	238.86	3.01	487429	0.209	10.86	<0.187	1.89	4.48	0.33	27.24	10.61	132.43	53.18	241.83	51.41	504.54	94.1	10501.6	304.41	1076.09	0.0913252
19-12-14-258	514.9	548.6	541.4	521.2		64.56	6.92	11.82	11.03		548.6	6.92		153225	531.68	9.8	482980	<0.206	13.13	0.335	4.93	8.35	1.103	35.9	10.97	115.1	40.13	164.47	32.6	295.46	53.83	9702.11	222.38	238.42	0.194762
19-12-14-259	249	64.1	69.1	60.4		205.18	1.6	6.16	3.85		64.1	1.6		153225	302.93	1.76	482142	<0.186	19.35	<0.155	0.99	2.3	0.481	15.44	6.62	90.99	39.84	203.79	49.05	530.47	109.8	10020.1	338.72	579.28	0.246761
19-12-14-260	0.1	49.4	47.2	35.3		605.99	2.32	15.43	4.85		49.4	2.32		153225	220.78	9.67	486435	<0.235	35.46	<0.140	1.54	3.25	1.301	16.07	5.72	71.19	29.26	139.01	31.84	336.4	67.28	7810.49	223.23	194.78	0.55036
19-12-14-261	190	28.4	30.3	26.2		236.34	0.72	3.18	1.97		28.4	0.72		153225	113.31	3.82	487688	<0.209	42.63	<0.166	1.19	2.48	0.619	10.68	3.29	36.86	13.81	63.95	15.05	159.12	32.2	11865.6	556.92	985.63	0.367704
19-12-14-262	70.6	46.4	46.8	48		202.13	1.01	4.01	11.19		46.4	1.01		153225	92.81	3.11	480909	<0.167	20.56	<0.155	1.34	1.64	0.727	7.22	2.13	24.78	9.4	44.47	10.65	124.28	35.58	13881.4	83.61	830.1	0.645897
19-12-14-263	0.1	46.7	42.4	46.6		389.22	1.88	11.42	4.38		46.7	1.88		153225	231.13	8.88	484020	<0.145	65.09	<0.169	2.07	4.54	1.74	23.7	9.17	112.92	45.09	215.6	48.96	501.09	99.44	7951.36	256.4	264.26	0.512822
19-12-14-264	560.7	116.6	140	100.3		442.02	5.49	30.01	7.24		116.6	5.49		153225	289.9	11.83	484304	<0.205	16.67	0.257	3.61	5.62	0.399	25.04	7.68	82.28	29.87	126.47	25.62	241.7	46.37	8085.23	152.38	87.14	0.102827
19-12-14-265	0.1	44.5	42.9	43.9		795.83	2.93	18.8	6.23		44.5	2.93		153225	234.15	13.57	483475	<0.225	53.11	0.186	2.23	4.71	1.83	22.18	7.25	86.15	33.65	155.44	34.31	347.41	69.99	7484.3	123.44	114.41	0.547368
19-12-14-266	142.7	48.1	49.9	44.7		282.86	1.38	6.27	1.72		48.1	1.38		153225	292.55	5.04	476338	<0.169	95.8	0.513	8.56	14.96	6.11	62.46	20.73	233.62	87.72	403.17	90.07	942.92	186.47	7709.77	806.47	446.56	0.611074
19-12-14-267	179.1	66.7	69.7	50.8		798.75	4.36	29.61	14.97		66.7	4.36		153225	228.85	5.86	484593	<0.208	14.09	<0.165	<1.10	1.7	0.689	9.94	3.97	52.89	22.28	113.84	27.23	297.13	62.35	8765.11	68.48	92.31	0.512414
19-12-14-268	50.6	94.9	93.1	119		362.82	3.04	14.87	8.42		94.9	3.04		153225	232.61	6.65	481677	<0.219	10.55	<0.153	<1.13	2.46	0.279	13.94	5.37	63.88	25.29	114.71	24.2	232.77	42.81	9804.38	122.06	182.29	0.145655
19-12-14-269	0.1	50.3	42.8	46.6		0	1.28	5.68	2.74		50.3	1.28		153225	408.34	2.76	484270	<0.214	50.78	<0.143	<1.26	3.21	0.72	18.87	7.32	93.05	39.18	190.58	43.94	465.15	92.82	9639.69	484.7	544.95	0.282822
19-12-14-270	77.9	48.1	48.7	45.7		434.09	1.84	9.78	6.43		48.1	1.84		153225	342.99	4.9	432751	0.31	18.09	<0.22	<1.44	2.22	0.286	14.03	5.36	67.04	28.19	136.37	30.36	314.42	62.44	9523.5	177.66	323.16	0.156668
19-12-14-271	294.6	120.4	129	110.6		249.35	3.16	13.98	6.52		120.4	3.16		153225	217.08	4.65	480061	<0.189	10.03	<0.150	2.18	5.14	0.628	29.53	10.54	119.7	45.46	195.71	39.8	369.81	67.5	10169.1	224.24	238.12	0.155835
19-12-14-272	476.2	449.8	453.6	476.4		34.88	4.05	5.27	6.23		449.8	4.05		153225	355.47	18.31	474291	0.202	22.77	0.245	3.41	7.13	1.252	45.83	16.59	201.11	77.22	339.59	68.58	656.32	120.14	9229.46	677.95	832.59	0.211741
19-12-14-273	52	47.4	47.4	49.9		355.02	1.6	7.53	4.32		47.4	1.6		153225	220.85	4.52	483856	<0.151	24.2	<0.107	<0.80	1.92	0.299	13.2	5.31	67.98	29.65	149.19	35.24	376.14	77.56	10344	220.06	347.93	0.181574
19-12-14-274	118.4	47.8	49.1	48.2		311.32	1.47	6.83	3.16		47.8	1.47		153225	117.18	3.26	483626	<0.183	31.16	<0.159	1.06	1.55	0.564	8.79	3.27	44.19	19.21	104.26	26.83	314.88	71.89	10041.9	346.65	432.86	0.467131
19-12-14-275	0.1	30.7	28.9	27.6		132.15	0.73	3.04	2.16		30.7	0.73		153225	107.81	4.27	478636	<0.199	42.92	<0.144	1.05	2.47	0.665	10.33	3.48	36.94	13.59	60.7	13.66	140.77	27.11	11963.2	552.7	1009.06	0.402478
19-12-14-276	574.7	60.6	75.3	67.5		309.95	2.36	11.08	6.61		60.6	2.36		153225	193.12	2.45	487302	<0.226	9.78	<0.185	<1.05	2.13	0.371	13.8	5.35	71.98	30.02	146.66	33.16	335.6	66.42	10239.6	140.97	251.91	0.209201
19-12-14-277	317.5	45.2	50.5	42		307.49	1.55	7.16	2.55		45.2	1.55		153225	134.8	3.7	482822	<0.205	25.81	<0.163	<1.01	1.28	0.508	6.71	2.71	35.48	16.07	91.28	24.55	300.75	73.1	10016.3	471.72	420.78	0.529928
19-12-14-278	84.1	91.4	91.1	87.3		85.32	1.18	3.03	2.58		91.4	1.18		153225	322.46	4.01	467916	<0.213	19.48	<0.176	2.39	6.06	0.45	34.28	13.15	159.97	62.09	283.17	60.48	593.13	110.68	10287.4	696.51	1264.02	0.0954499
19-12-14-279	12.8	64.5	63.1	55		237.29	1.5	6.35	2.97		64.5	1.5		153225	433.79	3.82	457043	<0.237	14.17	<0.170	1.72	4.37	0.654	23.9	9.5	117.61	49.11	232.68	52.74	524.39	102.36	8978.34	372.06	456.36	0.19564
19-12-14-280	195.5	74	77.7	89.7		1168.45	6.73	55.14	38.81		74	6.73		153225	91.18	2.71	470537	<0.202	1.93	<0.135	<1.00	0.5	<0.098	1.87	0.75	10.1	4.44	23.35	5.99	69.99	16.34	9187.49	24.58	55.05	n.a.
19-12-14-281	0.1	47.2	43.3	43.3		441.7	2.15	12.35	3.5		47.2	2.15		153225	195.21	5.63	493674	<0.170	62.81	<0.151	1.76	3.35	1.343	19.13	6.19	72.97	27.67	126.08	27.4	281.51	55.17	8874.95	300.83	225.33	0.51288
19-12-14-282	143.8	61.6	63.6	58.3		97.03	0.89	2.5	1.91		61.6	0.89		153225	232.29	<1.25	464323	<0.227	13.36	<0.141	0.97	4.22	0.209	34.28	14.39	188.39	74.65	335.88	70.01	647.13	116.33	11436.6	809.45	1407.01	0.0531238
19-12-14-283	3.9	63.5	61.9	59.7		260.48	1.62	6.88	4.58		63.5	1.62		153225	236.74	1.67	474187	<0.180	14.47	<0.119	0.88	2.09	0.283	14.49	6.22	83.18	34.8	172.57	38.79	392.94	76.56	10913.8	252.41	404.72	0.157217
19-12-14-284	130.9	118.7	119.1	110.8		62.48	1.33	2.86	1.65		118.7	1.33		153225	501.61	12.65	466580	0.179	41.07	0.9	13.53	21.43	1.027	107.04	37.36	424.53	154.86	653.71	127.32	1136.75	193.98	9660	2124.84	1467.09	0.065555
19-12-14-285	333.5	44.6	50.2	46.4		259.32	1.28	5.91	1.97		44.6	1.28		153225	227.5	9.36	470100	<0.222	74.16	0.46	7.46	12.32	4.49	54.02	16.57	175.07	60.51	257.15	53.03	523.39	97.91	8977	643.01	501.3	0.532088
19-12-14-286	1799.6	1778.1	1786.7	1691.9		23.25	16.66	10.02	24.42		1799.6	23.25		153225	328.57	51.71	473202	<0.218	8.04	0.706	8.76	11.91	0.321	45.32	13.35	134.07	43.74	173.31	32.58	286.83	49.1	9224.79	216.4	237.97	0.04224
19-12-14-287	713.5	16.2	22	20.4		551.21	1.2	6.57	2.82		16.2	1.2		153225	212.46	45.07	460831	<0.091	53.74	<0.145	1.97	5.35	2.83	32.23	11.08	138.86	56.6	269.33	61.05	637.59	125.59	8866.29	668.08	604.31	0.658869
19-12-14-288	0.1	44.6	41.1	44.9		250.74	1.59	7.38	4.18		44.6	1.59		153225	131.23	4.94	477109	<0.177	27.7	<0.122	<0.98	1.39	0.605	7.82	2.86	34.16	14.48	75.15	19.11	225.57	55.54	9823.68	240.28	361.84	0.561002
19-12-14-289	0.1	60.3	53.3	52.9		0	1.38	5.35	5.05		60.3	1.38		153225	219.79	2.2	481669	<0.172	7.68	<0.145	<0.85	1.98	0.26	12.75	5.68	73.35	31.26	149.88	33.27	334.99	63.06	10748	203.11	571.13	0.1582
19-12-14-290	1071.8	1114.5	1099	998.9		23.38	9.12	7.11	18.36		1071.8	23.38		153225	280.22	10.43	479066	<0.213	5.87	0.15	1.89	3.51	0.651	17.75	6.51	78.13	30.58	143.04	30.89	310.2	59.78	8756.88	154.52	457.99	0.252143
19-12-14-291	359.8	49.7	56.6	47		375.85	1.82	10.14	5.73		49.7	1.82		153225	256.03	3.1	479536	1.22	36.01	0.395	2.03	1.92	0.324	12.29	5.53	73.19	31.53	158.78	37.6	405.67	81.12	10817.6	292.69	431.89	0.20391
19-12-14-292	294.6	123.9	132.6	113.9		235.7	3.61	13.41	8.03		123.9	3.61		153225	209.09	3.23	481651	<0.184	10.72	<0.200	1.09	2.89	0.389	15.57	6.21	75.99	30.17	137.74	29.2	280.01	52.34	10544.7	167.22	207.13	0.177287
19-12-14-293	1426.5	1334.3	1369	1295.1		20.47	10.84	7.28	18.39		1426.5	20.47		153225	230.68	6.15	477124	<0.190	32.64	<0.150	<1.15	2.01	0.452	12.57	5.13	61.74	25.93	130.48	31.79	356.38	77.22	11290.9	236.41	426.3	0.274911
19-12-14-294	541.1	501.1	507.9	466.6		162.52	11.8	30.07	18.57		501.1	11.8		153225	250.36	24.73	482579	<0.189	29.35	0.16	2.23	3.58	0.707	15.98	5.1	53.49	18.52	80.13	16.08	154.65	27.42	9424.18	89.67	72.75	0.285765
19-12-14-295	0.1	42	40.8	41.5		1268.97	4.56	32.53	10.15		42	4.56		153225	193.59	8.72	485861	<0.192	19.39	0.265	3.63	5.29	1.99	21.96	6.86	76.22	28.11	126.04	27.48	277.96	55.06	7453.15	94.57	85.85	0.564454
19-12-14-296	0.1	45.5	44.5	48.9		565.69	1.93	12.2	5.86		45.5	1.93		153225	139.95	4.06	474543	<0.184	30.39	<0.155	<1.06	1.66	0.65	9.35	3.56	46.63	20.4	103.3	25.6	286.4	62.32	9226.14	165.05	239.55	0.504398
19-12-14-297	133.4	58.1	59.8	58.2		813.99	3.72	25.92	14.08		58.1	3.72		153225	162.08	10.19	479766	<0.246	7.76	<0.150	<1.18	0.99	0.141	5.76	2.29	29.87	11.61	56.71	12.73	127.08	26.03	10015.2	61.68	130.66	0.180514
19-12-14-298	263	63.3	68.6	62.1		281.3	1.75	8.71	4.06		63.3	1.75		153225	241.13	3.54	479585	<0.226	17.04	<0.185	3.45	5.81	0.993	29.94	10.89	132.49	51.83	238.46	51.98	511.39	96.67	9429.37	321.62	367.28	0.230173
19-12-14-299	51.1	113.8	110.9	105.3		113.57	1.72	4.96	3.4		113.8	1.72		153225	178.15	5.86	475276	<0.155	22.86	0.201	4.01	6.78	0.441	35.74	11.4	129.61	46.63	199.09	39.45	363.49	66.93	7203.6	519.65	701.21	0.0866096
19-12-14-300	863.4	746.4	775.5	791.8		47.62	8.79	11.73	26.63		746.4	8.79		153225	181.07	5.14	473170	<0.171	5.95	0.191	2.84	4.4	0.122	16.45	4.45	47.06	16.85	72.22	15.41	152.87	30.76	7309.02	58.88	196.05	0.0438399
19-12-14-301	0.1	48.6	45.9	47.7		251.87	1.39	6.8	2.32		48.6	1.39		153225	234.63	3.66	436724	<0.214	82.4	<0.177	2.14	4.44	1.41	24.66	8.68	99.39	37.66	170.37	36.65	368.65	69.6	9112.2	654.84	443.72	0.411956
19-12-14-302	215.7	191.5	193	177.7		75.79	2.46	5.57	4.46		191.5	2.46		153225	177.58	3.44	475793	<0.190	9.97	0.255	3.32	6.6	1.54	30.04	10.49	122.27	47.16	222.73	50.53	534.22	107.15	10021.6	452.51	633.24	0.334363
19-12-14-303	232.2	51	54.9	45.7		986.51	4.38	31.31	9.01		51	4.38		153225	205.89	10.97	474090	<0.217	41.6	<0.184	2.8	4.49	1.89	19.78	6.5	73.42	27.71	124.53	27.17	276.52	54.24	7628.21	151.36	111.47	0.613119
19-12-14-304	0.1	47.3	44.4	42.1		679.29	2.44	17.67	3.85		47.3	2.44		153225	228.88	10.87	479144	<0.195	59.14	0.166	2.97	5.07	2.39	26.37	9.36	104.27	39.76	176.21	38.54	389.89	76.47	7342.15	274.77	167.83	0.631914
19-12-14-305	0.1	46	41.1	44.2		999.51	3.93	29.24	8.56		46	3.93		153225	168.8	6.49	484603	<0.194	39.59	<0.169	1.67	2.68	1.052	12.71	4.24	48.66	18.59	86.21	19.67	202.07	41.22	8148.91	112.62	101.76	0.551055
19-12-14-306	755.7	771.8	766.9	741.7		56.28	9.69	13.73	28.04		771.8	9.69		153225	182.06	4.07	494137	<0.245	14.12	<0.163	0.98	1.8	0.444	9.33	3.18	40.1	15.68	74.98	16.61	171.01	33.08	9166.94	55.7	176.18	0.331227
19-12-14-307	0.1	108.5	79.4	102.6		133.85	6.49	30.17	10.45		108.5	6.49		153225	1360.63	31.36	482601	<0.194	2.3	0.33	6	11.69	0.389	68.84	26.39	343.22	125.94	502.18	91.88	778.35	128.39	8969.75	108.75	77.11	0.0419219
19-12-14-308	0.1	14.4	12.9	13.7		166.9	0.45	2.4	1.85		14.4	0.45		153225	81.13	3.57	476693	<0.172	43.21	<0.189	<0.93	1.47	0.379	6.58	2.05	23.36	8.88	44.68	10.83	129.51	28.69	10837.1	544.46	1306.67	0.372552
19-12-14-309	194	59.5	62.8	55.2		308.99	1.83	8.75	5.09		59.5	1.83		153225	263.76	3.72	475504	<0.244	15.73	<0.147	1.24	3.13	0.548	18.7	7.4	94.16	37.96	173.98	37.58	372.46	70.86	9786.53	238.26	395.55	0.218981
19-12-14-310	30	60	59.2	62.4		1130.92	5.21	39.06	18.77		60	5.21		153225	260.38	8.67	477078	<0.218	10.06	<0.150	<1.21	2.12	0.415	14.29	5.33	66.63	26.86	125.67	27.77	276.89	55.84	9236.82	58.29	90.49	0.230507
19-12-14-311	237.3	147.4	152.6	148.5		112.39	2.43	6.83	5.28		147.4	2.43		153225	188.52	1.78	457373	<0.187	10.13	<0.134	<0.92	1.45	0.393	8.34	3.47	48.4	21.48	116.36	29.34	335.41	73.59	9672.2	280.18	396.94	0.345498
19-12-14-312	1114.8	1119.1	1116.7	1059.4		23.05	9.12	7.12	17.57		1114.8	23.05		153225	370.69	3.44	454612	<0.144	3.76	<0.132	<1.05	2.26	<0.103	16.32	6.48	83.56	33.67	155.5	33.47	321.95	60.72	10293.4	168.18	427.03	n.a.
19-12-14-313	0.1	46.9	41.5	51		863.77	3.59	25.71	6.7		46.9	3.59		153225	196.51	8.39	461594	<0.208	33.22	0.303	4.93	7.44	3.06	30.48	9.16	101.16	36.35	157.77	34.15	340.36	66.06	7135.93	131.37	93.86	0.621222
19-12-14-314	203.1	66.9	70.6	63.1		285.49	1.94	9	3.59		66.9	1.94		153225	280.14	5.45	456148	<0.182	12.11	0.391	6.57	11.76	1.48	55.5	18.12	197.33	71.93	299.33	58.66	532.52	96.07	8193.99	309.55	306.25	0.177105
19-12-14-315	68.1	68.5	68.4	72.3		505.17	2.86	16.23	7.46		68.5	2.86		153225	209.67	4.17	466126	<0.189	15.56	<0.122	1.56	3.23	0.689	16.35	5.71	69.8	27.84	128.38	27.64	272.41	53.37	9075.85	120.6	161.23	0.289853
19-12-14-316	644	17.3	22.7	21.7		362.28	0.77	4.13	1.9		17.3	0.77		153225	92.79	1.83	463388	<0.194	30.14	<0.180	<1.05	1.61	0.73	9.4	3.41	41.22	17.65	88.99	22.33	257.48	58.19	10312.7	529.59	660.1	0.573674
19-12-14-317	58.6	119.3	116.3	109.1		49.28	1.14	2.13	2.15		119.3	1.14		153225	216.23	1.75	457213	<0.159	25.69	<0.155	1.77	5.55	1.62	37.88	15.9	200.97	82.53	399.91	91.38	964.36	190.12	12543.2	1106.03	2281.19	0.341573
19-12-14-318	1426.6	1428.7	1426.8	1364.7		18.38	10.89	6.64	16.3		1426.6	18.38		153225	291.68	38.11	458280	<0.206	24.16	0.344	5.58	14.69	0.39	93.48	36.29	431.96	157.38	640.39	117.8	953.66	143.05	9428.78	382.12	567.02	0.0321746
19-12-14-319	300.5	121.3	130.3	105.6		162.05	2.49	8.88	6.6		121.3	2.49		153225	171.43	2.79	471477	<0.238	10.54	<0.189	<0.96	1.33	0.399	9.3	3.58	46.34	20	101.45	24.94	280.23	60.15	10561.5	179.41	297.69	0.346837
19-12-14-320	0.1	50.5	47.4	52.2		966.43	3.9	28.27	8.49		50.5	3.9		153225	185.4	9.74	476376	<0.145	41.43	0.3	4.02	6.05	2.49	26.28	8.35	93.14	35.9	164.01	36.39	369.8	74.79	7350.27	120.8	104.01	0.60371
19-12-14-321	144.9	134.1	134.5	120.3		459.57	5.17	28.15	10.73		134.1	5.17		153225	310.53	8.36	481434	<0.251	21.6	<0.187	1.51	3.33	1.34	19.2	7.34	89.73	35.25	165.16	35.88	355.56	69.04	9242.24	107.22	106.2	0.512332
19-12-14-322	170.7	64	66.7	58.9		1014.63	5.85	38.78	12.69		64	5.85		153225	182.07	7.58	472611	<0.239	16.1	<0.196	2.11	3.73	0.812	15.41	4.57	48.88	17.32	75.14	15.71	150.48	28.44	7899.69	80.6	71.22	0.327431
19-12-14-323	198.6	50.2	53.3	51.1		643.68	3.02	17.43	7.37		50.2	3.02		153225	121.73	2.7	464339	<0.267	28.82	<0.207	1.23	2.14	0.644	8.79	3.28	37.14	14.22	69.04	16.09	173.3	35.85	9738.03	128.67	154.73	0.453946
19-12-14-324	182.9	43.3	45.8	49.9		1128.56	4.53	31.26	7.11		43.3	4.53		153225	260.25	17.74	466305	<0.206	27.95	<0.157	2.7	4.45	2.07	21.88	7.45	86.34	33.68	154.12	32.8	331.09	66.71	6359.06	120.66	82.26	0.641337
19-12-14-325	126.8	69.2	70.7	72.6		529.29	3	17.94	9.47		69.2	3		153225	186.71	2.5	465010	<0.200	10.91	<0.132	0.97	2.39	0.395	13.19	4.77	58.48	23.68	109.14	23.09	226.31	42.83	9438.91	105.11	156.67	0.215078
19-12-14-326	205.1	124	127.9	113.8		137.85	2.17	7.2	2.5		124	2.17		153225	481.14	7.52	451377	<0.168	34.68	0.538	9.06	17.31	2.13	90.09	30.21	333.57	118.64	483.11	92.25	810.32	137.64	8430.88	892.15	432.36	0.164897
19-12-14-327	0.1	48.4	44.2	46		0	0.87	3.07	1.81		48.4	0.87		153225	170.03	4.67	448573	<0.137	20.59	0.172	2.31	4.32	1.28	22.44	7.65	97.09	40.47	202.62	50.15	580.96	133.57	10367	660.6	834.71	0.397444
19-12-14-328	241.7	50.8	54.9	47.5		650.39	2.94	18.35	10.63		50.8	2.94		153225	139.84	2.48	460265	<0.126	25.96	<0.167	0.77	1.54	0.432	7.85	2.98	39.39	17.47	92.79	23.61	280.75	62.83	10083.2	195.94	274.81	0.379846
19-12-14-329	135.1	49.1	50.8	47.3		357.29	2.29	8.13	4.01		49.1	2.29		153225	269.95	15.08	464663	<0.182	12.72	<0.176	2.53	4.32	0.686	20.46	7.18	83.92	32.44	143.39	30.12	283.7	52.4	8216.2	251.52	270.59	0.223074
19-12-14-330	338.2	48.6	54.8	51.1		332.47	1.69	8.51	5.42		48.6	1.69		153225	210.2	2.84	461081	<0.195	15.69	<0.161	0.75	1.53	0.16	10.86	4.13	58.04	24.7	126.27	29.77	315.55	63.67	10426.5	148.21	286.25	0.119999
19-12-14-331	0.1	47.5	44.7	45.9		480.88	2	12.25	4.58		47.5	2		153225	178.17	7.49	520756	<0.140	67.33	0.296	4.85	7.51	2.68	30.07	9.89	110.46	39.89	182.74	40.89	435.09	87.75	10253.6	288.8	339.86	0.545215
19-12-14-332	0.1	48.3	45.3	47.3		248.99	1.45	7.11	2.94		48.3	1.45		153225	134.5	3.59	462102	0.195	36.7	<0.148	0.88	1.67	0.584	8.7	3.3	43.05	18.2	92.93	22.76	256.51	55.29	9705.7	369.62	388.47	0.468397
19-12-14-333	0.1	49.3	19.9	57.4		697.32	5.8	46.21	10.67		49.3	5.8		153225	148.19	7.81	467015	<0.201	37.31	<0.147	1.44	2.75	1.105	12.89	4.07	45.56	16.99	75.92	16.63	163.99	32.33	7942.59	81.92	68.32	0.567399
19-12-14-334	285.1	80.8	87.8	89.7		670.51	5.92	30.03	21.23		80.8	5.92		153225	200.34	6.87	470625	<0.227	7.4	<0.192	<0.95	1.68	0.388	10.67	4.11	48.77	19.62	89.14	18.61	181.64	35.19	9492.59	63.1	114.45	0.280165
19-12-14-335	0.1	62.6	59.9	53.5		420.2	2.43	12.74	7.97		62.6	2.43		153225	200.32	6.57	474007	<0.265	9.81	<0.124	<0.88	1.61	0.568	10.42	4.27	58	25.92	134.67	33.47	367.86	78.07	9399.29	117.36	207.43	0.423956
19-12-14-336	119.2	117.3	117.3	110.8		37.44	1.04	1.63	2.21		117.3	1.04		153225	131.81	1.5	453776	<0.177	6.21	<0.125	<0.78	1.17	0.43	10.12	4.4	60.78	27.78	147.64	36.91	437.01	94.07	12699.9	1100.45	3335.73	0.382036
19-12-14-337	0.1	14.9	14.3	15.6		317.72	0.51	2.61	0.68		14.9	0.51		153225	98.76	3.2	458605	<0.211	103.62	1.64	25.93	31.49	7.53	69.03	14.19	105.44	27.33	90.35	16.21	149.75	27.3	10770.9	1944.78	1064.1	0.493752
19-12-14-338	0.1	50.5	48.1	37		468.62	2.15	12.1	4.96		50.5	2.15		153225	232.37	4.22	469215	<0.217	54.39	<0.183	1.39	3.16	1.031	16.8	6.08	74.51	30.82	149.93	34.52	366.62	74.19	8545.82	191.16	214.46	0.432593
19-12-14-339	43.9	49.8	49.6	53.2		542.94	1.91	12.91	9.02		49.8	1.91		153225	190.19	2.18	458887	<0.225	17.6	<0.184	<1.04	1.15	0.135	8.58	3.23	47.2	21	108.58	27.18	292.1	60.57	10602.3	133.95	271.53	0.13139
19-12-14-340	160.9	127.2	128.8	120.9		83.88	1.73	4.21	3.17		127.2	1.73		153225	375.68	3.83	460523	0.68	29.22	0.519	3.88	5.19	0.26	26.13	9.79	121.14	46.91	213.72	44.99	424.64	76.65	10559.4	616.04	778.47	0.0682558
19-12-14-341	164	61.3	63.9	61.6		113.43	0.96	2.98	1.57		61.3	0.96		153225	470.86	2.36	489376	<0.122	53.38	0.29	5.85	11.15	1.58	59.41	23.91	293.73	121.47	573.62	128.19	1284.9	238.12	9046.1	2005.87	1770.4	0.187676
19-12-14-342	84.6	57.1	57.7	64.4		244.59	1.71	6	5.77		57.1	1.71		153225	21990.2	2.72	454148	224.25	502.4	61.75	279.86	54.26	4.75	53.62	10.54	92.88	32.76	153.68	36.22	395.67	83.2	10047.6	170.68	445.33	0.269222
19-12-14-343	241.6	195.7	199	188.9		120.87	3.57	9.39	5.86		195.7	3.57		153225	162.12	3.86	459408	<0.223	15.74	<0.125	<0.96	1.24	0.461	8.79	3.46	45.9	20.25	107.77	26.28	291.66	63.02	9351.92	341.87	333.47	0.426889
19-12-14-344	87	53.9	54.6	47.6		985.03	4.11	30.16	7.69		53.9	4.11		153225	281.41	12.92	465227	<0.210	21.09	0.165	2.44	3.94	2.19	18.62	5.94	64.29	23.64	101.51	20.67	205.18	39.67	6547.59	127.95	89.22	0.781674
19-12-14-345	34.3	44.7	44.4	45.8		344.59	1.55	6.8	3.46		44.7	1.55		153225	219.82	7.43	473195	<0.191	60.67	<0.157	2.02	4.36	1.36	21.67	7.56	87.5	35.06	165.16	37.62	384.58	76.54	8858	314.95	369.74	0.427746
19-12-14-346	0.1	47.1	45.5	37.1		680.68	2.43	16.28	6.14		47.1	2.43		153225	225.84	9.01	471153	<0.208	23.54	<0.177	1.77	3.59	1.32	15.4	5.61	67.25	27.26	132.57	31.12	330.88	67.69	7628.82	141.87	153.27	0.542732
19-12-14-347	371.6	127.9	141.1	118.7		544.09	6.44	37.37	14.8		127.9	6.44		153225	194.62	10.45	474094	<0.213	7.52	<0.169	<1.10	2.14	0.355	10.8	4.24	49.24	18.9	85.2	17.79	168.99	31.19	9071.39	66.69	70	0.225751
19-12-14-348	1653.1	1667.9	1660.4	1643.3		23.2	14.84	9.57	30.41		1653.1	23.2		153225	177.23	3.34	468720	<0.215	10.55	<0.183	<1.14	1.76	0.424	9.43	3.34	42.42	18.33	90.93	21.8	233.17	48.13	9019.4	106.79	215.5	0.31818
19-12-14-349	146.2	64.3	66.5	60.7		260.62	1.77	7.56	4.63		64.3	1.77		153225	260.45	4.42	469870	<0.217	15.86	<0.135	1.48	3.4	0.685	20.98	7.72	97.59	39.22	177.54	37.39	366.41	68.23	10273.2	245.12	369.85	0.247952
19-12-14-350	315.3	46.5	52	45.2		1091.86	4.34	34.76	12.22		46.5	4.34		153225	171.57	8.86	474221	<0.165	21.51	<0.131	2.04	3.35	1.26	14.48	4.9	56.8	22.29	106.92	24.51	261.79	53.8	7972.28	112.57	124.87	0.553074
19-12-14-351	0.1	47.2	46.1	40		893.41	3.25	22.32	12.5		47.2	3.25		153225	168.01	15.17	466146	<0.146	10.2	<0.131	<1.06	0.64	0.215	6.19	2.67	34.46	14.69	74.65	17.51	190.69	38.65	10615.2	94.86	167.54	0.330235
19-12-14-352	60	46.5	46.7	45.5		657.03	2.77	15.28	6.36		46.5	2.77		153225	181.62	6.87	473859	<0.250	40.94	<0.173	1.53	3.29	1.19	15.64	5.15	61.32	23.96	109.38	24.41	251.91	49.85	9465.67	272.11	326.91	0.507166
19-12-14-353	1014	1008.8	1009.7	982.1		28.52	9.01	8.33	17.53		1014	28.52		153225	180.19	3.08	482742	<0.233	18.47	<0.190	<0.84	1.5	0.836	10.31	4.08	51.6	22.9	116.35	28.75	325.31	69.74	11458.6	178.9	357.72	0.649906
19-12-14-354	374.7	31.9	36.9	29.7		126.04	0.57	2.03	1.26		31.9	0.57		153225	169.65	9.56	482714	<0.173	58.53	0.259	3.13	5.54	1.4	18.73	5.68	55.99	18.97	82.78	17.46	178.87	34.51	10549.7	1023.38	1182.79	0.420169
19-12-14-355	0.1	46.3	43.3	55.4		434.97	1.99	11.14	7.61		46.3	1.99		153225	127.84	2.14	483351	<0.201	27.82	<0.180	1.25	2.6	0.572	12.2	4.13	45.97	17.45	78.35	16.77	174.82	35.61	11294.5	129.17	285.49	0.310491
19-12-14-356	2830.2	2861	2841.9	2805.9		11.95	19.43	6.54	30.31		2830.2	11.95		153225	484.07	7.81	467983	<0.200	48.42	0.232	4.08	8.15	0.357	43.91	16.33	196.37	74.4	332.03	68.82	626.68	107.65	10700.5	285.29	385.5	0.0576935
19-12-14-357	236.9	48.7	52.6	45.8		397.35	1.7	9.86	4.34		48.7	1.7		153225	198.3	4.2	471233	<0.170	51.74	0.181	2.09	4.74	1.53	23.21	7.82	93.62	37.15	176.82	39.91	422.18	84.72	8969.31	283.45	329.46	0.445948
19-12-14-358	87.7	65.7	66.2	60.8		380.93	2.16	11.42	4.39		65.7	2.16		153225	208.7	3.26	467688	<0.178	14.19	0.17	3.42	7.03	1.11	38.21	12.87	150.59	56.91	244.71	49.63	466.54	85.27	8908.14	241.92	252.18	0.20705
19-12-14-359	256.3	125.1	131.8	149.6		83.76	1.77	4.36	8.44		125.1	1.77		153225	183.41	10.45	500959	<0.194	5.15	<0.130	<0.81	1.34	<0.080	11.41	5.4	76.6	34.56	170.58	40.63	411.22	78.26	14085.2	288.84	1427.84	n.a.
19-12-14-360	0.1	54.2	50.8	50.3		592.89	2.57	17.31	7.87		54.2	2.57		153225	234.27	8.62	467215	<0.212	11.78	<0.185	<0.97	2.22	0.362	12.17	4.73	58.02	23.68	117.69	26.76	279.31	56.54	9039.52	145.4	197.16	0.212915
19-12-14-361	222.8	49.6	53.2	46.3		928.59	3.66	27.98	8.69		49.6	3.66		153225	169.08	7.15	470008	<0.211	40.35	<0.167	1.44	2.93	1.07	12.67	4.19	51.27	19.13	88.11	19.41	194.46	38.66	8210.81	123.47	111.29	0.536885
19-12-14-362	859.4	851.7	853.2	823.8		55.35	10.85	14.74	25.86		851.7	10.85		153225	181.77	2.69	466346	<0.202	10.23	<0.170	<0.87	1.79	<0.093	10.67	3.66	47.59	18.49	84.5	17.62	168.06	31.01	10126.5	65.15	141.13	n.a.
19-12-14-363	169.9	206.5	203.3	199.8		42.31	1.91	3.13	4.15		206.5	1.91		153225	173.55	1.23	453183	<0.208	6.75	<0.139	<1.10	1.56	0.145	9.31	4.03	54.86	23.61	121.98	29.34	313.02	61.17	10947.7	568.93	1472.8	0.116319
19-12-14-364	242.1	182.8	186.9	185		96.15	2.63	7.02	3.66		182.8	2.63		153225	87.16	95.52	463901	<0.230	63.75	0.16	2.12	3.04	1.17	12.37	4.26	49.86	19.71	96.17	22.18	231.64	45.35	8767.13	729.88	478.94	0.583289
19-12-14-365	85.4	62.4	63	72		451.4	2.35	13.19	8.36		62.4	2.35		153225	219.55	4.3	463638	<0.128	10.59	<0.163	1.11	3.2	0.698	18.36	6.97	86.61	34.82	159.54	34.1	340.25	63.53	9440.1	119.94	225.18	0.278396
19-12-14-366	208.6	63.9	67.8	63.4		174.43	1.43	5.02	3.87		63.9	1.43		153225	405.52	2.24	465081	1.21	13.36	0.436	2.78	2.72	0.288	15.02	6.39	87.15	36.97	185.84	42.85	437.33	85.97	10418.2	310.2	547.07	0.13775
19-12-14-367	0.1	49	40.4	46.6		0	1.19	4.95	3.27		49	1.19		153225	201.76	4.42	461556	<0.218	21.16	<0.173	<0.99	2.3	0.448	12.84	5.32	64.55	26.82	128.95	29.19	304.34	59.93	10573.1	330.55	577.56	0.252029
19-12-14-368	271.6	52.1	57	53.3		505.87	3.12	14	8.93		52.1	3.12		153225	194.28	5.25	471054	<0.219	13.36	<0.119	<1.05	1.5	0.213	8.93	3.5	46.05	19.88	98.14	23.2	244.88	48.71	11016.2	162.91	279.83	0.177921
19-12-14-369	1876.4	596.4	943.5	1526.4		49.71	10.16	15.05	56.21		596.4	10.16		153225	233.44	41.98	457830	0.69	22.16	0.81	5.72	4.15	2.31	11.34	4.07	42.62	15.18	71.13	16.17	154.92	30.6	9311.52	65.33	274.99	1.02944
19-12-14-370	66.3	45.4	45.7	42.9		319.09	1.37	6.48	2.53		45.4	1.37		153225	224.76	5.43	466221	<0.207	76.15	0.195	2.48	5.15	1.67	25.21	8.3	94.72	35.13	159.41	35.07	360.05	70.07	9163.73	485.98	426.15	0.44807
19-12-14-371	285.3	46.6	51.5	45.3		128.72	0.85	2.82	1.43		46.6	0.85		153225	128.01	3.4	452814	<0.229	57.94	<0.148	1.04	2.21	0.764	13.39	4.96	66.6	28.99	156.07	40.38	483.21	111.02	10018.4	1246.06	1070.14	0.429365
19-12-14-372	340	50.6	57	52.3		431.48	2.45	11.83	8.55		50.6	2.45		153225	161.85	2.03	430446	<0.194	19.52	<0.162	<1.20	1.45	0.209	9.15	3.44	49.13	21.77	111.66	26.96	299.62	62.33	10101.4	153.16	283.16	0.175417
19-12-14-373	1222.8	1150.3	1175	1156.7		154.21	34.56	55.47	45.48		1222.8	154.21		153225	269.9	25.47	470452	<0.180	34.02	0.142	2.29	3.45	0.909	14.92	5.04	56.26	20.67	89.51	19.2	182.51	34.41	8836.27	36.2	18.81	0.387337
19-12-14-374	207.5	63.8	67.7	63.4		347.93	2.03	10.77	4.17		63.8	2.03		153225	318.59	5.69	467304	<0.230	24.97	0.147	2.54	5.11	0.988	27.43	10.07	121.93	47.22	210.96	43.97	415.98	77.34	8999.11	295.14	284.92	0.255125
19-12-14-375	0.1	59.2	54.7	41.9		1458.09	6.99	58.42	14.65		59.2	6.99		153225	195.9	12.69	469746	<0.224	10.18	0.33	5.32	6.78	2.09	27.63	8.4	90.38	32.51	137.17	27.29	255.11	47.75	7700.07	82.98	58.9	0.466832
19-12-14-376	0.1	32.1	27.7	33.2		342.28	1.42	8.85	2.43		32.1	1.42		153225	204.46	6.05	424670	<0.22	53.66	0.197	3.23	4.34	1.21	17.38	4.73	49.31	17.85	75.15	15.3	144.37	26.75	9149.06	795.03	473.36	0.425927
19-12-14-377	318.5	45.6	51	46.6		428.46	1.84	10.57	3.72		45.6	1.84		153225	183.88	6.22	464702	<0.208	44.42	<0.213	1.44	3.36	1.18	15.74	5.79	72.82	28.51	140.14	32.23	336.73	67.07	8498.86	284.63	278.42	0.496055
19-12-14-378	0.1	48.4	19.4	42.9		317.53	4.13	35.31	8.44		48.4	4.13		153225	144.95	7.53	462592	<0.148	29.85	0.364	4.82	6.59	2.61	25.42	8.13	88.48	31.6	137.46	28.81	287.96	55.42	7598.05	108.51	79.98	0.616495
19-12-14-379	308.7	46.9	52.3	44.8		372.78	1.58	9.24	5.49		46.9	1.58		153225	225.63	3.24	477268	0.303	29.19	<0.160	0.99	1.82	0.269	11.06	5.11	67.78	30.12	158.53	37.99	421.54	85.86	10739	227.5	359.75	0.183298
19-12-14-380	1152.6	1154.4	1153.1	1193.8		32.72	11.49	10.66	24.97		1152.6	32.72		153225	516.62	9.96	450142	<0.179	4.55	<0.123	1.42	3.4	0.262	20.1	8.09	103.39	41.11	189.52	40.84	401.31	74.06	10802.8	97.15	193.7	0.096891
19-12-14-381	213.2	46.6	49.9	50.7		455.96	1.91	10.9	4.57		46.6	1.91		153225	204.44	4.85	435668	0.162	49.62	<0.160	1.6	3.01	1.09	16.08	6.24	76.49	30.71	147.48	33.89	348.16	68.13	8067.72	211.99	241.15	0.478983
19-12-14-382	95.5	58.9	59.8	57.6		96.6	0.83	2.3	1.22		58.9	0.83		153225	329.77	3.91	463672	<0.170	54.6	0.88	14.05	32.03	1.78	158.5	51.28	570.89	202.35	812.63	155.51	1375.44	238.29	8197.59	1922.06	1419.17	0.0763741
19-12-14-383	545	566.6	561.9	556.4		80.88	8.18	15.62	20.61		566.6	8.18		153225	183.85	3.99	456210	<0.150	11.49	<0.193	<0.79	1.21	0.26	7.15	2.81	33.93	13.88	65.38	14.6	142.82	28.33	9074.17	72.56	149.02	0.270238
19-12-14-384	47.1	49.4	49.3	52.5		427.82	2.56	9.55	6.02		49.4	2.56		153225	225.47	3.81	463938	0.3	30.63	0.138	<1.16	2.1	0.599	13.69	5.39	68.04	27.81	137.36	32	337.94	66.14	9793.39	259.82	358.91	0.341535
19-12-14-385	412.5	45.3	52.7	42.8		518.69	2.71	13.75	4.12		45.3	2.71		153225	179.83	9.34	449901	<0.245	75.74	0.407	6.07	8.62	2.96	30.25	9.29	93.77	31.32	129.93	27.3	263.8	48.39	8347.04	356.36	225.53	0.560396
19-12-14-386	207.8	177	178.5	165.9		205.74	5.22	14.81	8.19		177	5.22		153225	197.17	4.64	452369	<0.229	38.11	<0.156	1.35	2.11	1.048	14.39	5.7	73.08	31.61	160.09	38.09	407.66	85.64	6996.98	218.27	208.99	0.581446
19-12-14-387	100.8	54.4	55.2	57.4		787.85	3.72	22.81	11.45		54.4	3.72		153225	269.49	7.66	455004	<0.159	16.44	<0.148	0.88	2.05	0.511	13.57	5.33	67.97	28.55	137.56	31	324.68	65.73	8929.28	86.75	123.3	0.296192
19-12-14-388	0.1	46.1	38.7	45.2		41.65	1.63	7.1	2.79		46.1	1.63		153225	163.39	4.18	469424	<0.132	39.34	0.189	4.28	6.22	2.154	26.88	9.1	102.86	39.3	186.09	43.53	474.33	101.11	9250.58	447.95	407.28	0.509278
19-12-14-389	0.1	47.8	44.9	44.2		234.59	1.58	6.44	2.29		47.8	1.58		153225	276.11	5.85	420393	<0.25	97.2	<0.180	2.55	5.76	1.75	27.22	9.26	104.74	37.61	172.4	38.47	394.56	79.04	8457.55	925.65	665.77	0.42727
19-12-14-390	1587.4	1619.4	1602.4	1519.8		29.9	17.38	12.16	36.39		1587.4	29.9		153225	262.22	6.31	457417	<0.193	12.01	<0.137	<1.10	1.76	0.181	10.5	4.65	62.7	25.5	122.2	27.14	263.53	50.75	9944.21	82.91	171.73	0.12872
19-12-14-391	159.6	49.3	51.4	44.4		306.78	1.59	7.08	1.89		49.3	1.59		153225	251.5	6.27	463494	<0.205	155.46	0.329	6.34	12.16	4.19	52.9	17.09	181.15	63.56	270.7	56.58	541.63	102.54	8684.64	735.67	403.04	0.505055
19-12-14-392	55.7	50.7	50.6	46.3		278.45	1.49	6.11	2.6		50.7	1.49		153225	232.33	6.71	462019	<0.204	56.84	<0.190	1.89	4.28	1.742	22.74	8.5	106.38	43.26	204.94	46.55	492.8	98.95	8129.72	609.92	508.55	0.539822
19-12-14-393	403.2	15.5	18.3	15.7		252.26	0.47	2.14	1.15		15.5	0.47		153225	291.72	5.15	461899	<0.211	110.09	0.163	3.15	6.73	1.203	34.76	13.43	164.27	63.65	299.62	69.31	701.03	129.4	10827.4	868.03	1222.3	0.240457
19-12-14-394	595.3	526.6	538.3	491.8		95.55	9.85	17.72	15.55		526.6	9.85		153225	185.68	27.86	472421	<0.185	17.25	<0.159	2.07	3.68	1.178	16.2	5.09	53.95	18.86	80.21	17.23	167.32	30.8	9678.48	163.96	150.19	0.466427
19-12-14-395	1109.4	853.3	925.6	913.9		98.69	22.65	28.45	37.14		853.3	22.65		153225	182.91	8.95	533659	<0.121	23.66	<0.090	<0.80	1.11	0.297	6.91	2.53	31	12.98	62.8	14.7	161.66	33.74	12735.6	163.41	125.7	0.32785
19-12-14-396	163.5	47	49.2	50.1		323.7	1.54	7.21	3.22		47	1.54		153225	111.64	1.95	468320	<0.185	29.76	<0.139	<0.88	1.11	0.466	6.35	2.57	33.97	15.77	86.55	22.38	270.76	63.1	9854.62	373.39	453.62	0.536608
19-12-14-397	0.1	57.1	51.6	56.1		338.84	2.17	12.38	9.52		57.1	2.17		153225	192.95	3.31	461067	<0.238	7.1	<0.158	<1.07	1.82	0.444	10.76	4.3	55.47	22.61	111.01	25.89	276.46	57.68	10365	105.38	245.18	0.306733
19-12-14-398	48.4	49.5	49.3	48.5		622.24	2.6	15.08	5.57		49.5	2.6		153225	200.57	6.47	463529	<0.212	38.53	<0.167	1.25	2.92	1.185	15.97	6.07	77.66	33.36	165.37	39.92	433.76	89.54	8116.77	218.34	249.05	0.53051
19-12-14-399	0.1	47.6	39.7	46.8		286.93	2.1	12.67	3.21		47.6	2.1		153225	279.78	12.16	462450	<0.198	86.24	0.219	4.64	7.92	3.73	40.8	14.58	177.91	69.53	311.48	67.09	665.14	131.61	7254.59	362.05	225.44	0.63436
19-12-14-400	0.1	50.2	42.2	47.6		27.63	1.44	7.36	2.66		50.2	1.44		153225	234.19	48.52	462233	<0.232	22.63	0.45	7.46	12.84	2.49	58.55	18.7	200.17	68.4	282.66	57.55	534.01	97.21	7902.7	456.4	425.96	0.277634
19-12-14-401	121.4	62.9	64.2	62.2		108.16	0.94	2.83	2.52		62.9	0.94		153225	220.08	2.2	460791	<0.134	11.35	<0.150	<1.02	2.12	0.227	16.9	7.79	109.01	45.98	222.67	51.07	509.27	97.87	11606.9	560.94	1280.04	0.11594
19-12-14-402	2585.5	21.8	78.5	141.1		61.29	0.52	2.23	5.15		21.8	0.52		153225	375.13	3.49	349965	0.67	6.58	0.69	5.93	3.9	0.465	5.3	1.48	20.6	10.46	82.55	31.32	497.53	140.27	16995.2	841.7	3229.3	0.312681
19-12-14-403	470.3	46.3	55.2	44.4		290.79	1.49	7.54	3.59		46.3	1.49		153225	111.95	7.52	471619	<0.168	31.01	<0.153	<1.00	1.48	0.471	7.95	3.08	40.12	17.25	90.38	22.79	263.08	58.6	10316.4	349.98	409.9	0.419784
19-12-14-404	123.8	64.2	65.6	54.5		185.21	1.44	5.12	4.77		64.2	1.44		153225	169.94	2.98	474743	<0.171	8.61	<0.152	<0.96	1.29	0.264	8.36	3.36	45.31	19.1	93	21.68	226.31	46.33	9786.25	221.39	560.71	0.245768
19-12-14-405	0.1	59.8	54.3	57.7		0	0.74	1.87	1.28		59.8	0.74		153225	494.19	3.71	494223	<0.169	33.95	0.144	2.59	9.78	1.227	69.83	27.83	346.44	132.19	576.88	118.4	1122.92	202.56	10657	2401.89	2572.38	0.14354
19-12-14-406	265	43.7	47.8	47.2		781.21	3.12	20.23	10.65		43.7	3.12		153225	126.91	12.17	469142	<0.196	24.63	<0.169	<0.91	1.22	0.552	6.38	2.56	32.76	14.21	75.92	19.8	233.25	53.61	9272.31	218.34	305.97	0.604879
19-12-14-407	50.2	132.8	128.1	129.3		264.35	3.21	14.19	6.86		132.8	3.21		153225	221.12	3.19	470398	<0.219	13.41	<0.185	<1.04	3.17	0.412	19.59	7.24	91.05	35.29	153.64	32.36	308.68	57.54	10640.5	186.27	217.32	0.159834
19-12-14-408	332.3	67.9	75.6	62		312.38	2.21	10.83	6.22		67.9	2.21		153225	382.19	2.78	470271	<0.180	10.48	<0.168	1.33	3.75	0.694	22.1	8.26	103.9	40.29	180.62	38.29	377.24	72.46	9758.41	160.05	276.29	0.23306
19-12-14-409	0.1	62.7	55.9	69.7		288.12	2.28	12.72	6.04		62.7	2.28		153225	220.29	4.56	463150	<0.191	9.76	0.172	3.43	6.32	0.905	30.54	10.37	118.2	43.37	186.95	37.64	348.36	64.44	9000.47	178.31	233.67	0.199148
19-12-14-410	109.7	65.2	66.1	62.6		166.02	1.31	4.58	3.73		65.2	1.31		153225	199.19	1.5	467644	<0.124	9.05	<0.117	<0.84	1.53	0.178	11.54	5.27	74.07	32.29	163.18	38.22	394.67	77.77	11722.4	298.5	634.3	0.129506
19-12-14-411	823	68.7	94.9	60.6		442.87	3.74	21.71	8.43		68.7	3.74		153225	229.97	10.78	463374	<0.191	12.37	0.106	1.5	3.46	0.64	19.67	7.43	89.65	33.91	153.54	32.08	308.99	57.61	9571.03	103.53	110.8	0.23717
19-12-14-412	133.5	114.3	114.8	105.2		125.7	1.91	5.81	10.93		114.3	1.91		153225	916.76	5.01	460087	<0.194	0.99	<0.147	<0.92	3.74	<0.101	26.79	13.4	179.09	72.64	337.06	73.15	700.4	128.89	10900.5	95.89	537.03	n.a.
19-12-14-413	2388.5	2236.3	2313.9	2128.9		21.08	21.9	10.92	48.83		2388.5	21.08		153225	186.19	9.19	462831	<0.221	9.89	<0.159	<0.77	1.28	0.164	6.98	2.28	29.47	11.14	50.74	10.98	107.87	20.98	9191.19	48.32	106.63	0.167738
19-12-14-414	0.1	53.5	47	52.2		373.67	2.42	13.96	8.3		53.5	2.42		153225	241.29	9.59	462696	<0.160	8.27	<0.155	<1.01	2.07	0.559	14.51	5.35	69.3	27.99	133.77	30.5	309.91	61.93	8697.63	118.28	224.52	0.311826
19-12-14-415	45.4	47.6	47.4	42		379.76	1.63	8.14	2.99		47.6	1.63		153225	216.25	5.02	468188	<0.177	58.13	<0.165	1.88	3.64	1.238	19.43	7.04	85.96	34.13	159.83	36.74	376.26	74.26	9061.29	393.88	350.6	0.450042
19-12-14-416	155.1	49.5	51.5	51.3		255.69	1.28	5.81	2.91		49.5	1.28		153225	183.63	5.36	463434	<0.239	38.45	<0.172	<1.01	1.83	0.565	11.99	5.09	67.64	30.32	159.01	39.94	451.29	95.98	10338.7	404.16	509.11	0.368751
19-12-14-417	1168.3	1123.9	1137	1054.7		27.69	10.21	8.94	20.83		1168.3	27.69		153225	175.32	6.9	459995	<0.172	8.39	<0.150	1.12	2.81	0.281	14.89	5.32	65.11	25.39	117.37	25.86	254.61	48.54	10249.5	135.27	302.89	0.132808
19-12-14-418	621.9	42.6	54.5	38		290	1.91	7.47	3.2		42.6	1.91		153225	241.9	6.94	509122	<0.188	89.41	0.345	5.85	10.35	3.8	50.12	16.38	189.92	71.94	330.19	71.75	725.47	139.87	9253.07	466.14	405.33	0.510067
19-12-14-419	0.1	63.2	61.1	61.6		86.31	0.89	2.39	1.97		63.2	0.89		153225	356.9	1.76	457629	<0.138	12.04	0.158	2.33	7.61	0.295	51.46	20.68	266.43	105.89	472.13	97.33	911.49	166.63	11333.8	855.64	1459.37	0.0455737
19-12-14-420	1419.1	875	1042.8	1923.2		21.25	7.2	6.61	45.01		875	7.2		153225	261.28	2.28	460217	<0.221	5.69	<0.210	<0.90	0.66	<0.109	4.45	1.96	30.15	15.2	91.86	30.02	421.47	101.71	13008.5	53.11	600.79	n.a.
19-12-14-421	997.4	839.9	882.6	813.2		19.5	6.27	5.2	10.09		839.9	6.27		153225	441	13.69	427661	0.24	16.81	0.207	1.7	3.96	0.623	19.38	7.28	98.95	42.14	215.38	52.2	571.79	117.19	10216.2	639.8	1157.03	0.217412
19-12-14-422	0.1	50	45.2	46.3		1264.15	4.87	41.63	12.22		50	4.87		153225	173.74	9.85	474445	<0.210	37.27	<0.176	2.34	3.85	1.582	17.32	5.47	64.66	24.93	112.04	24.21	246.79	49.57	7753.03	73.26	70.1	0.592273
19-12-14-423	218.7	70.9	75.1	66		83.33	0.96	2.53	2.47		70.9	0.96		153225	317.51	2.2	526227	<0.159	15.89	<0.154	<0.88	2.6	0.289	23.91	11.81	161.62	67.02	323.51	75.14	744.29	139.95	13901	751.1	1763.82	0.112057
19-12-14-424	2405.7	1976.6	2192.2	1796.2		13.31	13.83	6.58	52		2405.7	13.31		153225	182.37	7.21	495225	<0.180	0.88	<0.148	<0.92	2.54	0.229	17.61	4.48	33.5	8.58	31.26	6.72	67.51	14.04	13213.3	55.86	770.32	0.104679
19-12-14-425	117.4	122.8	122.2	118.3		112.76	1.91	5.47	4.21		122.8	1.91		153225	584.54	10.8	471376	<0.196	10.95	0.267	4.48	10.14	0.663	48.8	15.74	170.8	64.3	282.3	58.48	565.27	106.88	9331.46	389.73	613.27	0.091118
19-12-14-426	365.4	48.8	55.6	44.7		632.92	2.94	18.36	10.79		48.8	2.94		153225	501.64	9.2	478929	1.54	12.18	0.48	2.95	1.89	0.391	9.48	3.61	45.84	19.04	94.81	22.04	232.89	47.16	9857.55	88	155.79	0.282398
19-12-14-427	260.1	46.6	50.9	46.2		380.1	1.66	9.1	4.09		46.6	1.66		153225	252.37	5.25	472640	<0.193	15.34	<0.158	1.51	3.63	0.685	20.83	7.17	94.66	37.98	144.74	41.47	409.01	84.25	9460.81	273.28	319.12	0.240831
19-12-14-428	510.6	30.1	36.9	32.5		108.06	0.62	1.69	1.16		30.1	0.62		153225	593.47	13.28	330091	<0.224	62.8	0.268	4.35	13.3	1.122	70.32	20.74	232.31	76.77	262.16	68.12	622.83	118.34	8050.67	3526.24	3876.18	0.112162
19-12-14-429	0.1	46.6	41.2	42.6		901.89	3.57	26.76	5.44		46.6	3.57		153225	270.58	14.97	470149	<0.154	45.28	0.748	9.71	15.79	6.14	62.53	16.8	173.23	57.27	193.09	48.18	420.71	83.05	7138.81	169.88	90.83	0.597383
19-12-14-430	672.7	67	86.7	65.2		278.23	2.68	11.38	8.8		67	2.68		153225	253.11	3.65	479512	<0.110	8.37	<0.106	<0.85	1.71	0.626	10.09	3.38	46.55	19.23	82.1	25.72	278.17	65.47	10276.4	112.13	210.62	0.460734
19-12-14-431	314.1	76.5	84.3	78.7		204.82	2.5	7.35	4.1		76.5	2.5		153225	202.19	4.2	534072	<0.114	40.09	0.333	4.67	6.95	2.44	28.86	7.96	92.89	32.62	124.62	35.58	354.86	74.94	10714.8	495.52	409.92	0.526707
19-12-14-432	2410.5	1931.6	2172.2	1882.2		25.32	22.21	12.57	39.74		2410.5	25.32		153225	240.25	7.01	516310	<0.180	20.7	0.15	1.84	3.29	1.267	17.7	4.98	60.22	23.2	90.23	24.64	242.11	51.19	9153.96	92.57	120.95	0.507588
19-12-14-433	463	50	59.5	54.4		508.13	3.55	15.07	6.93		50	3.55		153225	287.77	18.64	492757	<0.166	11.72	0.323	4.66	8.14	1.299	41.08	12.49	144.18	52.4	188.23	45.38	407.36	77.36	9065.07	185.27	165.5	0.217171
19-12-14-434	735.4	645.8	665.3	628.4		46.94	7.3	10.15	32.41		645.8	7.3		153225	1534	5.2	482546	<0.182	3.98	<0.163	<1.02	2.15	0.11	21.84	13	212.49	88.25	367.22	100.37	948.04	182.3	13885.1	48.24	303.18	0.0490757
19-12-14-435	306.9	112.3	121.4	112		87.08	1.73	4.2	4.9		112.3	1.73		153225	354.53	2.97	494111	<0.155	10.23	<0.132	2.76	5.98	0.419	37.54	13.08	167.94	64.98	250.71	61.91	560.15	108.55	10028.7	328.66	830.72	0.085494
19-12-14-436	39.2	41.8	41.7	41.3		840.82	3.52	18.5	4.97		41.8	3.52		153225	226.69	4.67	542748	<0.173	59.03	0.34	5.11	8.92	2.73	35.93	10.49	114.98	40.43	147.81	36.56	330.72	66.4	9340.3	244.09	143.66	0.466199
19-12-14-437	255.1	107.7	114.2	113.9		79.56	1.45	3.61	2.93		107.7	1.45		153225	258.6	7.89	464245	<0.248	27.33	0.274	3.74	8.62	0.296	49.44	15.7	185.46	65.62	241.34	56.45	486.17	90.81	7809.58	843.64	1137.42	0.0438347
19-12-14-438	960.7	48.2	72	56.9		217.34	1.94	7.45	3.12		48.2	1.94		153225	257.08	4.52	499500	<0.108	34.94	0.285	3.55	7.06	3.06	32.09	9.97	122.73	45.55	183.79	48.84	494.55	101.68	9395.45	558.72	405.63	0.621518
19-12-14-439	476.9	501.2	496.4	495.9		36.78	4.54	5.98	8.03		501.2	4.54		153225	228.52	4.71	479482	<0.177	17.78	<0.151	1	2.4	0.159	12.69	4.75	67.13	27.44	125.36	34.2	336.23	67.79	12551.5	396.25	650.26	0.0880806
19-12-14-440	170.8	47.7	50.1	46.5		237.74	1.28	5.21	3.5		47.7	1.28		153225	167.28	3.48	484120	<0.139	20.76	<0.132	1.3	2.2	0.709	11.43	3.58	48.37	19.16	85.49	23.61	248.34	56.37	9414.61	311.13	490.82	0.432246
19-12-14-441	44	59.3	58.9	59.5		166.02	1.12	4.05	2.23		59.3	1.12		153225	272.3	1.77	477595	<0.208	18.21	0.155	1.9	5.91	0.338	36.73	13.25	164.7	60.74	237.55	53.85	462.31	85.9	9176.06	736.12	807.55	0.0701345
19-12-14-442	91.6	47.4	48.3	46.9		86.56	0.63	1.65	1.05		47.4	0.63		153225	454.08	2.46	468459	<0.141	113.28	0.118	2.04	5.65	0.481	39.71	14.72	197.54	78.88	347.95	87.07	816.85	160.09	12728	2091.32	2085.13	0.0981726
19-12-14-443	394.4	47.4	54.8	46.5		516.78	2.37	14.29	8.61		47.4	2.37		153225	188.15	7.76	486411	<0.211	8.64	<0.199	<1.05	0.85	0.135	5.77	2	27.9	11.39	53.31	13.88	143.64	29.66	9906.77	108.11	186.7	0.186361
19-12-14-444	0.1	50.9	46.3	40.5		1166.82	4.4	37.92	25.46		50.9	4.4		153225	164.57	4.64	381769	<0.48	6.61	<0.37	<1.69	<0.83	0.23	3.26	1.35	20.6	8.46	39.42	10.28	103.09	22.43	7962.28	64.63	146.36	n.a.
19-12-14-445	144.2	45.8	47.6	47.7		178.2	0.94	3.62	1.73		45.8	0.94		153225	203.31	2.62	482186	<0.164	67.43	<0.177	1.53	2.8	0.821	16.46	5.76	75.98	30.54	150.64	40.93	433.81	98.36	10679.8	883.74	854.56	0.369716
19-12-14-446	285.6	120.7	128.8	121.1		129.51	2.31	6.81	2.42		120.7	2.31		153225	603.57	8.95	487090	<0.175	44.31	1.07	17.08	32.07	6.02	153.29	43.44	485.65	159.74	617.57	125.25	1039.66	185.78	8969.4	1069.05	391.63	0.262488
19-12-14-447	226.1	137.9	142.7	137.8		472.79	7.36	30.89	10.76		137.9	7.36		153225	286.8	5.46	396036	<0.35	13.78	0.31	4.96	7.92	1.58	41.08	13.07	159.44	55.42	232.43	49.24	417.56	79.19	7956.52	299.02	178.06	0.267793
19-12-14-448	440.6	9.6	11.6	15.3		162.92	0.24	0.84	7.12		9.6	0.24		153225	1426.3	3.15	514292	<0.262	2.62	<0.39	<1.33	2.46	0.266	20.23	11.17	190.94	84.22	499.21	163.34	2102.25	470.6	27318.4	247.34	7884.68	0.115275
19-12-14-449	119.9	64.9	66.3	64		282.57	1.71	8.24	5.05		64.9	1.71		153225	261.07	2.44	483584	<0.131	12.2	<0.144	<0.86	1.69	0.259	12.92	5.04	71.74	29.34	138.68	32.56	316.95	64.54	11047.7	240.98	400.54	0.169451
19-12-14-450	954.5	26.9	40.7	41.7		288.03	1.36	5.84	4.71		26.9	1.36		153225	141.46	31.35	464672	<0.206	21.93	0.276	3.66	4.55	1.282	12.94	3.26	33.77	11.11	49.04	11.87	123.27	28.7	10303.8	287.1	782.41	0.510781
19-12-14-451	966.7	899.7	918.4	926.8		56.73	11.78	16.1	33.78		899.7	11.78		153225	194.68	10.05	492809	<0.211	5.32	<0.168	<1.00	1.21	<0.099	7.68	2.66	34.35	12.96	61.66	13.48	124.63	23.61	10227.3	47.48	125.03	n.a.
19-12-14-452	19.2	63.2	62	64		395.59	2.06	11.05	3.71		63.2	2.06		153225	360.02	7.32	533887	<0.191	27.45	0.262	3.67	6.98	1.076	32.39	11.01	140.15	52.44	235.08	49.62	453.63	88.1	8668.39	464.27	312.38	0.218775
19-12-14-453	27.5	63	62	66.4		171.17	1.35	4.35	2.5		63	1.35		153225	427.47	2.7	490082	0.124	27.74	0.353	5.69	10.32	1.695	53.04	17.98	219.64	83.2	395.85	86.8	823.11	166.92	13893.4	679.38	995.15	0.221487
19-12-14-454	0.1	65.1	56.9	67.2		173.75	2.13	10.95	4.27		65.1	2.13		153225	334.43	7.43	495008	<0.180	15.55	<0.169	1.73	3.81	0.896	21.07	7.33	96.31	38.11	190.55	42.77	402.57	82.15	8572.32	267.27	264.47	0.305726
19-12-14-455	0.1	46.3	40.3	50.6		56.15	1.34	6.08	2.85		46.3	1.34		153225	216.02	3.85	463739	<0.178	39.01	<0.133	1.05	2.11	0.661	10.79	4.08	50.43	20.21	107.76	24.84	262.43	58	9620.16	391.74	423.7	0.423515
19-12-14-456	451.1	43	51.1	43.3		324.47	1.86	7.79	4.36		43	1.86		153225	113.97	2.87	513513	0.168	21.97	<0.154	1.22	1.53	0.511	7.22	2.39	32.3	13.63	84.41	22.2	279.21	75.63	11443.6	397.29	456.36	0.470031
19-12-14-457	434	47.1	55.4	48.3		229.93	1.48	5.74	2.92		47.1	1.48		153225	185.64	3.67	476865	<0.152	32.42	<0.137	1.39	2.16	0.753	12.11	4.17	56.42	24.06	145.55	34.81	393.57	93.66	10011.1	521.39	542.74	0.450107
19-12-14-458	437.9	46.1	54.4	45.4		297.43	1.46	7.59	3.01		46.1	1.46		153225	205.02	4.35	475438	<0.180	31.97	0.108	0.92	1.94	0.583	11.57	4.23	57.84	24.17	137.07	30.34	314.58	69.12	9743.48	351.29	395.5	0.376201
19-12-14-459	496	18.4	22.6	19.6		386.27	0.74	4.34	1.75		18.4	0.74		153225	125.34	5.7	474771	<0.183	34.9	<0.141	<0.97	1.87	0.751	10.14	3.65	50.56	21.35	129.52	29.56	328.81	77.51	10706.4	653.72	749.07	0.527254
19-12-14-460	241.1	49.3	53.3	48.4		166.66	1.07	3.81	1.08		49.3	1.07		153225	768.01	24.53	463453	<0.233	138.56	1.04	13.32	25.32	4.28	118.16	34.16	372.63	124.31	592.51	103.23	896.21	163.88	7901.3	2608.28	878.75	0.239219
19-12-14-461	410.2	47.8	55.6	50		487.43	2.17	13.59	6.63		47.8	2.17		153225	221.31	14.33	534916	<0.168	10.11	<0.143	<0.97	2.58	0.369	14.08	4.64	59.61	22.55	118.54	22.19	204.44	41.67	10747.2	165.11	215.92	0.187169
19-12-14-462	166.9	50	52.4	59.9		793.81	4.67	21.95	14.79		50	4.67		153225	250.22	8.66	450963	<0.31	11.61	<0.177	1.22	1.45	0.252	9.42	3.09	39.05	15.07	89.11	16.74	156.2	33.09	9476.17	119.41	192.17	0.208454
19-12-14-463	756.4	63.5	85.5	70.2		440.55	3.4	19.3	7.86		63.5	3.4		153225	287.77	11.68	496706	<0.262	11.36	0.163	2.38	5.76	1.225	30.38	9.72	121.44	45.78	249.25	44.38	400.52	79.8	9586.59	127.57	133.1	0.283107
19-12-14-464	1285.7	67.4	116.1	83		168.66	2.26	9.39	5.62		67.4	2.26		153225	704.79	6.02	447417	<0.182	21.01	<0.168	2.37	5.66	1.441	30.22	10.48	135.87	53.95	322.84	60.18	596.49	123.78	9459	290.67	367.09	0.336843
19-12-14-465	0.1	49.9	46.4	73.4		1915	9.63	75.82	20.32		49.9	9.63		153225	257.12	11.46	499501	<0.205	21.09	0.252	3.86	5.88	2.66	22.86	6.48	73.73	25.52	142.16	25.01	240.5	51.06	7710.51	76.47	59.15	0.701414
19-12-14-466	331.7	147.4	158.6	140.8		33.03	1.26	1.94	2.62		147.4	1.26		153225	1141.44	3.77	500374	1.92	28.45	2.78	29.5	139.56	94.55	557.06	86.15	532.72	122.44	543.02	82.29	714.29	128.62	12475.6	1196.36	3254.8	1.03669
19-12-14-467	172.8	43.5	45.8	42.2		352.64	1.63	7.39	1.86		43.5	1.63		153225	412.62	9.12	499311	0.178	122.95	0.86	13.38	22.05	8.11	88.92	25	278.66	95.07	517.1	86.18	796.37	156.67	7803.01	864.99	365.19	0.559933
19-12-14-468	183.9	46.8	49.4	46.9		158.74	0.9	3.34	1.46		46.8	0.9		153225	250.12	3.97	484442	<0.278	75.2	0.392	5.02	7.65	2.42	40.2	12.97	163.96	63.3	397.35	74.78	767.77	169.9	9940.38	1290	1022.67	0.421882
19-12-14-469	359.9	46.4	52.8	43.9		315.31	1.43	7.79	3.33		46.4	1.43		153225	400.28	8.55	486414	<0.181	18.06	<0.167	2.09	4.1	1.131	25.21	9.26	126.48	50.31	318.13	56.08	541.46	111.6	8109.71	367.17	384.78	0.340098
19-12-14-470	12.2	27.7	27.5	29.5		532.29	1.08	7.01	2.66		27.7	1.08		153225	309.93	5.27	432560	<0.31	42.13	0.44	5.54	7.78	1.47	25.62	6.79	66.5	20.74	112.25	19.31	181.87	36.43	10393.6	801.57	907.62	0.318315
19-12-14-471	3298.2	2947.9	3158.9	2945.9		11.77	21.21	6.74	48.13		3298.2	11.77		153225	161.67	4.03	486164	<0.220	8.94	<0.100	<1.03	0.6	0.239	6.93	2.67	38.98	17.17	120.18	22.64	231.5	49.77	11823.1	80.33	252.61	0.358323
19-12-14-472	283.7	84.5	91.6	84.7		256.08	3.32	10.12	5.56		84.5	3.32		153225	481.34	5.67	464362	0.9	36.19	0.24	1.86	2.79	1.22	13.22	4.05	48.86	19.08	122.83	22.32	229.21	51.22	8989.59	458.47	408.21	0.614132
19-12-14-473	373.5	44.7	51.3	40		719.78	2.74	20.01	6.55		44.7	2.74		153225	292.15	8.99	492025	<0.226	69.62	<0.223	3.02	5.95	2.056	30.35	9.26	117.36	44.88	294.93	47.52	455.41	95.22	8495.25	202.95	188.01	0.46774
19-12-14-474	641.8	510.5	534.5	502.5		162.58	12.14	31.99	18.32		510.5	12.14		153225	302.01	27.85	496513	<0.141	28.13	<0.193	2.39	4.31	0.768	18.46	5.26	56.27	19.19	118.09	17.38	155.69	28.67	9698.55	108.41	75.16	0.263224
19-12-14-475	461.9	43.4	51.8	42.8		293.54	1.66	7.07	2.16		43.4	1.66		153225	176.73	3.08	450312	<0.206	53.5	0.159	2.05	4.09	1.035	20.25	6.16	74.11	28.99	198.15	32.25	332.73	71.08	10130.7	1015.74	550.3	0.347685
19-12-14-476	167.4	112.8	115.1	108.2		278.34	3.92	13.69	5.72		112.8	3.92		153225	259.99	4.04	546591	<0.191	14.26	0.161	2.45	3.75	1.268	20.96	6.99	88.85	35.19	257.47	41.32	429.84	93.28	11118.7	469.23	299.88	0.437248
19-12-14-477	194.4	102.5	106.3	108.8		146.45	2.29	6.3	6.65		102.5	2.29		153225	280.28	5.65	523164	<0.134	5.54	0.106	1.7	4.22	0.31	25.11	8.43	103.83	37.65	242.59	34.39	308.1	57.19	12728.3	198.84	471.91	0.0920665
19-12-14-478	1627.1	1530.7	1570.5	1526.4		27.58	15.26	11.02	33.36		1627.1	27.58		153225	897.93	12.22	494747	<0.185	1.68	0.193	1.88	5.59	0.097	37.5	12.33	158.08	57.62	380.02	52.44	452.83	85.41	11379.9	72.78	160.82	0.0204819
19-12-14-479	299.6	112.2	120.9	123.4		109.63	2.1	5.32	3.94		112.2	2.1		153225	600.23	5.26	462098	<0.210	19.18	<0.21	2.98	7.45	0.306	50.93	18.89	240.19	89.7	610.32	83.02	735.89	139.21	12264.4	1011.06	1145.12	0.0480259
19-12-14-480	659.6	505	533.4	493.8		142.03	10.62	27.78	15.17		505	10.62		153225	208.4	11.31	501817	<0.193	8.31	<0.184	<1.13	1.79	0.125	9.4	3.06	36.42	12.53	84.17	11.37	97.38	18.67	12004.4	132.38	84.68	0.093162
19-12-14-481	158.4	77.1	79.5	81.2		175.73	2.01	5.76	4.12		77.1	2.01		153225	115.98	3.61	551239	<0.161	32.19	<0.121	<0.84	1.39	0.668	8.17	2.49	33.81	14.02	113.38	18.31	208.99	50.35	12325.5	544.88	644.07	0.606007
19-12-14-482	284.8	125.1	133.3	122.2		136.26	2.2	7.5	4.92		125.1	2.2		153225	316.73	7.57	495509	<0.36	12.92	<0.173	1.34	3.03	<0.140	18.7	6.84	84.07	31.51	228.09	30.71	267.73	50.61	11550.4	350.52	506.22	n.a.
19-12-14-483	879.6	807.8	826.3	805.4		57.78	10.49	15.13	17.32		807.8	10.49		153225	244.61	4.18	509021	<0.208	7.64	<0.193	2.4	6.06	1.361	36.42	12.4	155.05	56.97	401.49	50.45	429.74	78.02	7234.28	177.5	171.84	0.280073
19-12-14-484	938.6	961.5	953.6	1044.4		91.2	17.05	27.17	32.18		961.5	17.05		153225	245.29	<3.00	386751	<0.36	6.1	<0.29	<2.16	4.41	0.875	27.08	8.93	107.88	38.45	268.43	32.74	274.11	50.47	5175.9	116.2	120.97	0.244784
19-12-14-485	0.1	17	9.7	15.1		170.67	1.09	8.39	2.88		17	1.09		153225	231.53	2.85	484409	<0.163	26.89	0.141	2.11	3.03	1.041	13.61	3.98	47.42	17.65	143.52	20.84	218.3	49.09	10154	341.86	327.13	0.495587
19-12-14-486	0.1	31.3	30.7	31.6		452.69	1.13	6.68	2.61		31.3	1.13		153225	210.84	3.49	482338	<0.126	44.23	<0.192	1.12	2.54	0.616	12.42	4.3	53.95	20.6	181.58	22.93	215.43	41.09	10267.2	421.17	468.92	0.335291
19-12-14-487	379.3	53.8	61.6	47.7		333.48	2.5	9.46	4.44		53.8	2.5		153225	477.29	6.17	519844	<0.102	27.99	0.453	7.48	11.16	4.11	55.84	17.31	212.46	80.87	702.05	85.13	817.81	171.86	9438	292.31	278.88	0.503334
19-12-14-488	484.6	39.1	47.2	53.1		839.89	4.76	22.49	10.77		39.1	4.76		153225	216.22	11.94	534918	<0.191	54.7	<0.150	1.9	3.42	1.103	18.34	5.73	69.85	27.18	244.13	29.54	286.15	58.91	9814.72	174.58	169.4	0.425777
19-12-14-489	649.4	12.5	16.4	13.1		265.03	0.4	2.13	0.66		12.5	0.4		153225	417.65	8.9	557271	0.126	62.34	0.78	12.75	18.17	2.79	71.14	17.67	171.82	52.89	398.42	38.51	319.9	58.05	10854.2	2310.75	1549.11	0.237241
19-12-14-490	0.1	45.2	42	46.9		135.59	1.19	4.84	1.98		45.2	1.19		153225	183.46	4.04	538422	0.128	71.32	0.146	1.68	3.45	1.202	23.29	7.21	92.72	37.28	371.57	46.05	479.65	105.04	11048.2	1191.43	795.12	0.409949
19-12-14-491	361.5	71.6	80.7	73.2		82.16	1.1	2.69	2.46		71.6	1.1		153225	197.47	4.37	481636	<0.180	44.51	<0.183	1.44	4.59	2.071	24.93	7.93	96.51	36.12	353.15	40.76	412.57	87.32	10090.2	784.31	1360.9	0.591878
19-12-14-492	408.6	44.2	51.5	53.5		1126.86	5.59	36.43	9.44		44.2	5.59		153225	172.61	6.28	509484	<0.182	26.86	0.414	6.31	7.58	3.17	26.62	6.86	73.24	23.94	216.35	22.86	218.62	45.33	9061.06	122.51	86.86	0.682245
19-12-14-493	182.9	108.3	111.5	112		130.82	1.75	5.97	3.11		108.3	1.75		153225	472.81	7.17	488451	<0.31	11.5	0.58	8.71	15.76	1.426	83.61	25.68	300.66	104.78	921.18	85.74	728.56	135.41	7806.02	654.19	648.96	0.120097
19-12-14-494	154	46.6	48.6	53.4		501.44	1.9	11.76	11.38		46.6	1.9		153225	244.43	2.43	470596	<0.196	19.85	<0.150	<0.89	0.52	0.285	4.95	1.99	29.97	14.29	182.55	22.96	243.66	58.27	8964.22	73.21	293.57	0.543075
19-12-14-495	477.4	41.4	49.8	40.7		591.65	2.56	15.49	4.66		41.4	2.56		153225	266.01	7.33	494153	<0.182	30.32	0.364	5.51	8.22	3.13	36.83	10.94	126.63	44.54	450.49	45.28	430.41	89.55	8039.26	267.51	208.07	0.549955
19-12-14-496	406.9	43.8	50.9	39.8		214.72	1.1	4.96	14.47		43.8	1.1		153225	140.19	2.71	489719	<0.205	22.85	<0.159	<1.13	1.83	0.759	8.72	2.81	33.4	13.39	143.45	14.46	147.29	33.98	12625.2	69.82	700	0.580868
19-12-14-497	0.1	112.6	96.8	110.9		10.63	2.94	10.99	4.13		112.6	2.94		153225	378.32	6.12	487855	<0.239	14.8	<0.198	3.81	6.38	0.638	29.2	9.16	105.16	38.29	385.36	34.16	302.85	58.23	10222.7	449.75	294.06	0.142902
19-12-14-498	26.1	58.3	57.4	58.1		136.7	0.99	3.19	2.06		58.3	0.99		153225	364.02	2.01	487829	<0.157	16.72	<0.168	1.92	5.49	0.584	35.87	13.21	176.76	67.8	731.29	65.14	570.45	109.25	10977.1	801.07	1065.22	0.127227
19-12-14-499	0.1	53	43.5	49.9		330.94	2.51	15.93	7.72		53	2.51		153225	315.93	11.99	492625	<0.152	13.19	<0.145	3.22	5.17	1.227	31.03	9.86	123.8	45.67	505.01	43.16	394.08	79.74	9150.53	159.91	218.73	0.296161
19-12-14-500	200.4	56.2	59.6	47.1		844.5	3.81	27.46	10.54		56.2	3.81		153225	271.03	12.25	497458	<0.216	11.25	<0.157	1.3	3.34	0.515	19.06	6.46	79.46	30.05	338.68	28.79	258.34	52.08	9973.75	101.01	108.72	0.197329
19-12-14-501	371.5	40.5	46.6	70.4		1076.87	4.35	30.85	21.3		40.5	4.35		153225	100.91	5.58	496811	<0.161	11.59	<0.162	<0.74	0.37	0.218	2.41	0.733	8.63	3.5	50.68	5.39	61.91	15.47	9959.26	40.3	91.35	0.705775
19-12-14-502	353.5	45.2	51.4	51.8		250.66	1.3	5.85	3.3		45.2	1.3		153225	219.41	4.19	491768	<0.171	21.31	<0.140	0.8	1.61	0.306	10.61	3.73	55.06	22.75	309.64	27.69	281.8	60.38	11485.9	356.76	542.65	0.226345
19-12-14-503	7.7	58.2	57	59.5		484.21	1.99	12.86	3.74		58.2	1.99		153225	296.17	8.78	490263	<0.181	35.63	0.934	12.96	16.15	3.69	58.53	15.41	164.5	55.69	645.08	47.9	421.46	82.92	8507	368.94	293.27	0.366919
19-12-14-504	0.1	56.3	52.6	54.6		0	0.78	2.16	1.07		56.3	0.78		153225	370.07	4.49	517046	<0.152	43.85	0.247	4.32	11.02	0.737	75.99	25.23	307.68	109.21	1301.64	90.87	763.25	141.55	10031.9	2461.16	1679.14	0.0778606
19-12-14-505	0.1	118.6	110.4	109.5		101.9	2.29	7.06	4.92		118.6	2.29		153225	712.23	7.65	495831	<0.135	5.16	<0.144	1.97	4.74	0.121	30.3	11.37	150.85	56.5	740.81	53.98	481.45	91.08	11435.5	289.15	402.96	0.030867
19-12-14-506	1053.2	955.1	984.5	948.3		42.21	11.01	12.25	29.61		955.1	11.01		153225	554.24	3.37	507384	0.226	9.01	<0.172	1.53	2.32	0.176	13.53	5.04	67.83	25.75	368.15	28.53	262.58	51.66	10926.2	71.1	207.33	0.0960371
19-12-14-507	525.1	41.4	50.9	39.7		266.48	1.45	6.34	3.98		41.4	1.45		153225	283.28	9.19	492665	<0.220	21.46	<0.162	<1.00	2.03	0.212	12.95	4.75	66.2	27.53	422.69	32.05	314.09	66.42	11395.2	240.96	388.49	0.126407
19-12-14-508	94.5	58.2	59	58.1		154.65	1.05	3.78	1.89		58.2	1.05		153225	269.44	3.36	499741	<0.194	18.31	<0.138	1.84	5.81	0.337	39.39	13.77	175.1	64.06	876.72	56.17	481.22	90.02	10160.5	935.5	990.71	0.0681033
19-12-14-509	224	74	78.5	61.2		85.44	0.99	2.72	4.63		74	0.99		153225	775.96	1.93	498244	<0.197	5.67	<0.160	<0.76	1.42	0.12	15.6	8.45	136.67	57.24	933.95	67.23	626.01	124.34	13673.4	263.01	1505.82	0.0779461
19-12-14-510	181.8	44.7	47.2	45.2		164.38	0.86	3.32	1.04		44.7	0.86		153225	436.09	8.59	500103	<0.242	157.98	0.534	8.01	14.66	3.69	67.12	21.27	253.68	91.37	1409.26	92.3	826.63	163.65	8779.73	2384.65	1104.32	0.359627
19-12-14-511	2833.2	2490.2	2682.5	2516		13.96	19.29	7.42	32.39		2833.2	13.96		153225	654.04	5.93	504061	<0.197	29.65	0.572	8.79	13.82	0.715	68.2	21.38	254.15	90.61	1361.75	76.9	628.17	112.57	10152.7	159.43	237.34	0.0711999
19-12-14-512	196.8	63.1	66.6	61.5		443.6	2.5	13.94	4.52		63.1	2.5		153225	303.07	6.79	530200	<0.213	15.14	0.329	5.57	10.23	2.08	51.2	16.17	196.24	69.66	1104.03	61.8	550.75	107.17	9675.74	276.68	217.73	0.27785
19-12-14-513	111.6	57.1	58.3	55.9		96.18	0.78	2.27	1.14		57.1	0.78		153225	400.97	3.48	502819	<0.177	37.82	<0.202	3.45	10.51	0.634	73.29	25.42	313.46	111.98	1822.15	95.3	793.5	147.41	10166.9	2436.9	1893.56	0.0698369
19-12-14-514	95.6	44.7	45.6	42		124.84	0.7	2.33	1.19		44.7	0.7		153225	386.08	4.32	502137	<0.197	142.02	0.172	2.91	6.5	1.179	41.85	15.05	196.1	76.91	1484.84	86.88	834.12	170.53	11726.5	1881.96	1737.13	0.218539
19-12-14-515	427.6	54.2	63.4	48.8		231.02	2.16	6.41	3.3		54.2	2.16		153225	368.5	17.24	553857	<0.155	33.79	0.4	5.49	10.57	1.93	51.08	17.13	206.17	77.02	1458.04	77.21	705.73	142.3	11145.3	781.38	574.04	0.25393

## Sheet: River 4
	Age (Ma)					1s error					Age used (Ma)	1s error		Trace elements (ppm)
	Pb207/Pb206	Pb206/U238	Pb207/U235	Pb208/Th232		Pb207/Pb206	Pb206/U238	Pb207/U235	Pb208/Th232					Si	P	Ti	Zr	La	Ce	Pr	Nd	Sm	Eu	Gd	Tb	Dy	Ho	Er	Tm	Yb	Lu	Hf	Th	U	Eu/Eu*
15JT04 01	n.a.	88	93	79		258	16	4	9		88	16		153225	169.12	10.65	266029	<0.256	11.67	<0.206	<1.15	1.63	0.35	8.46	3.06	40.84	15.63	74.01	16.61	171.19	32.6	11176.6	70.52	97.57	n.a.
15JT04 02	376	100	89	89		180	10	3	5		100	10		153225	215.97	15.67	262696	<0.29	13.28	0.329	4.81	8.37	1.02	33.98	10.97	124.56	43.37	181.51	36.86	346.04	60.63	10492.6	172.45	166.66	0.184904
15JT04 03	n.a.	84	97	77		408	26	5	17		84	26		153225	109.39	7.43	265913	<0.286	4.54	<0.161	<1.02	<1.52	<0.34	4.9	1.94	25.83	9.93	49.59	11.5	119.84	24.12	9243.72	38.56	58.45	n.a.
15JT04 04	78	91	92	90		216	11	3	6		91	11		153225	206.09	14.65	263589	<0.217	12.09	<0.204	1.11	2.24	0.46	14.28	5.3	64.06	22.97	101.24	21.5	207.73	38	11014.6	128.42	148.84	0.24865
15JT04 05	n.a.	83	92	92		136	7	2	4		83	7		153225	225.42	15.18	265773	<0.239	13.42	0.275	4.44	6.71	0.83	34.78	12.06	144.26	52.04	226.51	46.63	437.05	79.63	10069.7	302.36	264.13	0.166101
15JT04 06	236	340	356	346		33	7	5	10		340	7		153225	234.46	4.81	262891	<0.237	8.4	<0.163	<1.12	2.67	<0.31	17.37	7.28	94.16	36.56	166.38	35.22	340.11	59.99	10691.9	153.74	325.61	n.a.
15JT04 07	n.a.	87	90	85		74	4	2	3		87	4		153225	201.38	7.49	263076	<0.259	8.4	<0.183	1.47	2.39	1.07	11.2	4.41	55.67	23.19	118.82	29.49	328.88	71.49	10285.6	369.34	515.08	0.632259
15JT04 08	62	87	88	87		187	9	2	5		87	9		153225	266.64	22.52	261741	<0.202	7.88	0.37	5.8	8.67	1.18	38.91	12.3	137.56	46.34	193.12	38.25	349.79	61.24	9991.31	179	206.91	0.196409
15JT04 09	355	342	340	329		54	11	6	13		342	11		153225	186.61	8.2	260281	<0.30	4.96	<0.28	<1.40	3.05	<0.38	20.77	7.09	89.14	32.63	142.92	29.16	274.19	49.18	9975.36	90.47	186.46	n.a.
15JT04 10	80	89	89	88		36	2	1	4		89	2		153225	441.19	7.36	255902	<0.27	21.78	<0.196	<1.13	1.82	<0.35	15.75	7.59	114.92	49.47	250.53	60.22	632.91	122.77	15902.3	256.33	1424.42	n.a.
15JT04 11	71	86	87	91		109	6	2	5		86	6		153225	460.93	5.83	260637	<0.263	13.96	<0.183	1.44	2.19	<0.39	15.17	6.03	79.79	33.96	169.22	40.87	439.78	87.79	13922	180.48	356.03	n.a.
15JT04 12	n.a.	75	87	88		131	6	2	4		75	6		153225	170.44	14.31	261243	<0.242	12.19	0.51	5.93	9.14	1.18	34.47	11.29	119.99	41.03	169.85	33.35	310.41	52.66	10401.2	299.31	325.31	0.203239
15JT04 13	310	55	49	51		100	3	1	1		55	3		153225	621.09	11.39	256047	<0.23	84.44	0.41	7.62	15.41	2.4	74.63	27.53	337.75	124.23	544.83	114.18	1094.01	194.45	9638.4	1090.24	667.6	0.216358
15JT04 14	n.a.	74	88	84		229	12	3	6		74	12		153225	228.08	14.18	256544	<0.29	12.82	<0.226	3.14	6.09	1.03	31.04	9.82	112.26	39.45	170.69	35.26	336.89	58.69	10391.3	138.47	139.55	0.229027
15JT04 15	292	348	357	362		44	9	5	9		348	9		153225	641.89	14.12	258871	<0.250	3.73	<0.241	4.05	6.97	0.28	36.56	13.17	158.56	61.8	273.7	57.3	538.02	94.44	10921.5	187.03	231.35	0.0536239
15JT04 16	85	54	54	51		121	4	1	3		54	4		153225	475.67	<2.89	257955	<0.242	6.4	<0.207	2.29	4.4	0.58	26.16	10.15	126.36	51.3	243.33	56.24	588.33	115.35	11368.6	240.01	504.88	0.165273
15JT04 17	n.a.	116	123	120		133	9	3	7		116	9		153225	210.86	5.7	255565	<0.218	19.08	0.237	3.73	6.44	0.39	31.36	10.78	122.81	45.37	195.47	40.26	384.67	68.87	7954.36	132.43	199.75	0.0838983
15JT04 18	306	349	356	358		26	6	4	10		349	6		153225	725.35	9.8	261644	<0.29	2.95	<0.196	2.56	5.8	<0.39	37.34	14.07	176.61	68.48	306.87	65.57	633.65	113.55	10924.8	143.49	436.96	n.a.
15JT04 19	330	350	353	347		62	12	6	16		350	12		153225	293.39	10.88	257323	<0.24	4.34	<0.158	1.57	2.94	<0.33	17.8	6.75	84.68	32.64	147.88	31.37	308.1	57.23	10076.5	63.32	140.14	n.a.
15JT04 20	64	93	95	100		183	10	4	7		93	10		153225	169.35	9.6	260784	<0.23	7.67	0.236	1.72	5.63	1.1	26.58	8.45	98.52	36.55	156.52	33.87	328	57.74	9439.28	107.71	130.81	0.274904
15JT04 21	178	182	182	187		119	12	4	9		182	12		153225	189.47	7.74	257199	<0.214	11.97	<0.192	1.63	4.14	0.9	18.5	6.56	82.62	32.16	152.66	35.36	371.23	73.16	10901.1	107.83	138.66	0.314395
15JT04 22	51	49	49	60		416	14	3	9		49	14		153225	135.2	53.68	259371	<0.24	6.59	<0.125	<1.02	<1.23	<0.33	9.25	2.91	35.12	14.58	68.15	16.44	176.38	35.77	10782.3	56.44	113.18	n.a.
15JT04 23	233	182	179	153		281	30	10	23		182	30		153225	152.74	7.02	256282	<0.33	6.52	<0.179	<1.56	2.42	0.54	13.95	4.46	55.61	21.41	102.5	23.47	242.23	47.4	9837.98	44.16	64.74	0.284131
15JT04 24	216	83	79	88		117	6	2	5		83	6		153225	111.25	7.54	252912	<0.266	5.13	<0.206	<1.25	<1.47	<0.28	4.87	1.97	25.54	10.68	50.75	11.94	120.48	23.25	9421.69	160.91	357.32	n.a.
15JT04 25	13	178	191	160		257	29	8	22		178	29		153225	171.04	5.36	254400	<0.29	6.96	<0.200	<1.34	<1.43	<0.42	7.73	3.08	41.23	17.25	84.14	19.2	210.31	42.3	9779.01	39.07	61.18	n.a.
15JT04 26	126	90	88	79		231	13	5	8		90	13		153225	395.02	17.74	261370	<0.22	20.52	0.27	5.91	7.05	1	37.37	12.72	151.75	52.99	235.68	49.32	475.68	81.19	8986.46	265.85	203.79	0.188349
15JT04 27	119	87	86	87		360	20	4	8		87	20		153225	164.57	14.62	259951	<0.27	8.5	<0.229	2.67	4.6	0.99	23.6	8.08	95.84	33.97	148.91	30.67	291.66	53.41	9472.44	85.54	82.69	0.290482
15JT04 28	46	52	52	44		274	10	3	6		52	10		153225	337.33	10.79	263838	<0.26	16.28	0.23	3.91	7.77	1.22	40.11	13.56	162.51	59.95	263.38	55.36	539.8	95.18	10020.4	145.73	163.08	0.211272
15JT04 29	n.a.	51	53	56		549	20	3	23		51	20		153225	121.81	3.76	258151	<0.32	2.54	<0.207	<1.29	1.3	0.42	5.99	2.06	28.68	11.99	61.88	15.76	177.55	39.88	8205.88	25.12	87.45	0.460133
15JT04 30	426	335	323	317		29	7	5	7		335	7		153225	773.26	33.63	250166	<0.226	7.6	0.259	3.8	8.3	<0.30	44.87	17.42	217.88	84.13	375.25	79.53	740.73	131.44	10554.9	483.39	470.74	n.a.
15JT04 31	302	352	360	349		25	6	5	10		352	6		153225	271.24	5.45	250918	<0.227	3.47	<0.179	<0.94	1.78	<0.30	13.98	5.94	77.29	31.35	140.25	31.06	306.1	54.13	11256	132.08	391.34	n.a.
15JT04 32	48	45	44.5	49		82	2	0.8	3		45	2		153225	287.71	<3.28	251704	<0.222	6.37	0.221	4.18	8.11	0.54	31.26	9.78	105.38	37.87	161.71	34.3	338.17	64.76	12477.3	237.82	928.19	0.103683
15JT04 33	376	358	355	376		34	8	5	14		358	8		153225	226.08	6.61	250502	<0.27	5.31	<0.175	<1.24	2.08	<0.35	13.22	5.12	61.54	24.53	113.66	24.28	237.95	42.91	10012	85.47	227.33	n.a.
15JT04 34	n.a.	40	53	48		1008	36	8	30		40	36		153225	125.38	<3.19	253936	<0.29	5.34	<0.18	1.42	2.06	1.03	13.94	4.89	51.52	17.32	72.75	14.21	142.46	26.37	9613.76	34.8	77.37	0.587613
15JT04 35	426	361	351	347		19	5	4	13		361	5		153225	671.89	6.22	252137	<0.195	2.89	<0.166	1.83	5.3	<0.33	38.32	14.18	168.24	56.65	230.87	46.65	433.8	74.06	11821.1	99.89	579.93	n.a.
15JT04 36	117	181	186	172		291	32	8	22		181	32		153225	223.12	14.28	256435	<0.28	5.8	<0.170	1.28	2.11	1.11	13.16	4.96	64.58	25.98	130.24	31.42	344.92	72.33	7435.76	32.73	45.04	0.643981
15JT04 37	335	340	341	329		26	6	4	12		340	6		153225	625.79	3.93	251252	<0.221	2.01	<0.128	1.32	3.55	<0.31	25.33	10.22	138.76	54.09	248.2	53.68	531.59	95.72	12074.6	102.17	410.64	n.a.
15JT04 38	394	337	329	336		34	8	5	10		337	8		153225	351.61	10.3	252223	<0.227	5.04	<0.207	<1.26	2.55	<0.38	16.26	6.91	92.97	36.7	168.49	36.48	342.31	61.05	10642.1	135.89	287.37	n.a.
15JT04 39	398	329	320	320		16	4	4	7		329	4		153225	399.93	6.74	250948	<0.233	5.47	0.229	3.74	7.39	<0.32	40.57	15.11	190.7	72.81	324.11	69.24	665.62	119.63	11078.4	309.04	791.56	n.a.
15JT04 40	82	89	89	89		48	3	1	2		89	3		153225	176.35	5.04	249084	<0.253	24.54	0.43	5.23	8.88	4.88	37.78	12.42	139.92	52.6	234.47	52.72	557.42	112.64	8438.94	1566.52	898.28	0.81452
15JT04 41	279	247	244	319		20	4	3	10		247	4		153225	942.34	5.77	248890	<0.28	2.24	<0.171	1.17	3.29	<0.29	24.73	12.69	185.68	79.17	382.03	88.53	891.91	164.26	12349.1	130.29	900.49	n.a.
15JT04 42	294	136	127	119		136	10	3	8		136	10		153225	349.95	3.94	251409	11.02	42.47	3.89	20.27	8.49	<0.42	29.26	9.33	107.25	38.6	164.73	33.54	313.76	57.93	8002.4	103.08	165.71	n.a.
15JT04 43	171	90	87	94		207	11	3	8		90	11		153225	213.06	19.08	248649	<0.178	12.52	<0.169	<0.93	2.02	<0.24	11.88	4.03	52.63	20.61	93.94	21.24	216.21	39.49	10730.6	89.37	134.12	n.a.
15JT04 44	n.a.	71	94	108		315	19	6	13		71	19		153225	239.25	21.42	250231	<0.16	11.88	<0.20	1.76	2.7	0.4	13.56	5.38	62.57	22.95	101.11	20.49	207.38	37.23	9462.73	117.98	140.45	0.202101
15JT04 45	339	334	334	330		23	6	4	15		334	6		153225	809.34	9.2	244712	<0.225	0.66	<0.182	<1.14	3.09	<0.37	21.89	11.46	166.01	64.15	279.1	57.64	521.64	85.6	12246.2	64.63	460.18	n.a.
15JT04 46	235	188	185	176		295	30	7	27		188	30		153225	174.41	5.47	249697	<0.272	5.01	<0.221	<1.11	1.35	0.43	7.18	2.88	38.89	16.51	82.68	19.93	223.51	46.28	9232	22.79	48	0.422239
15JT04 47	19	79	81	84		144	7	3	6		79	7		153225	364.5	6.55	251593	<0.22	24.22	0.2	3.12	6.95	2.35	33.52	12.05	144.48	58.35	272.25	63.41	728.66	123.07	8782.08	281.68	324.27	0.470699
15JT04 48	380	353	349	344		17	5	4	13		353	5		153225	1076.83	4.85	251772	<0.27	1.16	<0.185	<1.34	3.89	<0.32	31.21	16.08	231.88	89.72	395.76	84.05	789.4	128.57	12664.3	85.46	658.91	n.a.
15JT04 49	141	93	91	94		251	13	3	7		93	13		153225	234.78	19.13	250867	<0.221	10.48	0.292	3.77	7.4	1.08	28.81	10.03	113.12	40.73	174.83	36.97	357.5	63.99	9369.89	118.55	124.89	0.226129
15JT04 50	389	355	350	362		30	7	5	11		355	7		153225	848.24	10.06	247897	<0.198	2.84	0.231	4.35	9.19	0.47	54.53	19.48	233.77	85.15	363.1	76.82	730.44	128.79	10301.9	134.84	335.91	0.0641862
15JT04 51	221	183	180	185		100	10	4	8		183	10		153225	509.75	19.4	252846	0.97	15.94	0.41	5.12	6.72	1.66	34.42	12.11	151.38	59.37	276.61	60.79	610.79	114.35	8913.2	159.51	175.75	0.333686
15JT04 52	42	50	50	40		577	21	5	16		50	21		153225	226.48	6.92	262286	<0.26	11.47	<0.146	<1.04	2.04	0.48	10.93	4.53	62.36	24.09	114.23	26.51	284.53	45.95	10755.1	54.1	96.76	0.310767
15JT04 53	n.a.	83	88	95		201	11	3	7		83	11		153225	248.44	8.03	250681	<0.281	9.79	<0.192	1.79	4.16	0.98	21	7.55	91.77	35.01	158.01	35.02	347.77	64.9	9819.96	110.4	144.71	0.320545
15JT04 54	236	56	52	50		158	5	1	6		56	5		153225	326.03	<2.70	263040	<0.26	4.25	<0.146	0.97	2.52	0.35	11.1	5.08	68.11	28.68	136.34	34.13	369.85	71.4	10586.4	87.33	336.24	0.202314
15JT04 55	386	359	355	366		26	6	5	9		359	6		153225	234.51	9.2	260656	<0.224	6.96	0.27	5.16	11.41	0.71	61.16	20.3	223.78	80.88	336.42	66.69	621.15	103.51	9521.54	278.01	491.74	0.0821677
15JT04 56	270	184	178	232		355	42	13	35		184	42		153225	222.18	8.49	258062	<0.24	7.82	<0.176	1.32	2.87	0.93	18.26	6.14	80.6	31.07	141.4	31.39	316.62	59.82	9020.38	29.27	41.25	0.392745
15JT04 57	209	93	88	89		140	7	2	6		93	7		153225	429.28	4.68	257216	<0.243	13.22	<0.183	1.23	2.46	0.49	16.68	6.74	84.72	34.93	163.46	37.19	381.55	73.55	12430	155.2	248.72	0.233857
15JT04 58	n.a.	50	51	51		164	5	1	3		50	5		153225	297.41	5.11	256398	<0.205	14.4	0.59	9.54	19.51	7.67	73.42	20.44	217.41	69.54	275.07	56.15	558.46	103.22	8054.52	418.38	394.63	0.619554
15JT04 59	116	178	182	193		396	51	17	39		178	51		153225	211	13.71	262256	<0.30	10.29	<0.20	<1.42	1.98	<0.31	10.71	3.81	54.08	20.64	102.66	23.72	231.56	46.81	9923.1	60.19	78.91	n.a.
15JT04 60	178	188	189	215		326	37	9	31		188	37		153225	183.27	9.19	251101	<0.30	5.28	<0.191	<1.38	1.41	0.5	8.16	3.02	37.67	16.87	82.49	20.61	230.33	47.94	8846.64	18.4	35.32	0.450645
15JT04 61	242	99	94	96		232	14	5	9		99	14		153225	242.76	19.83	244651	0.55	19.55	0.37	5.27	4.51	0.64	17.01	5.29	62.73	21.69	96.88	21.79	205.6	35.62	9227.19	192.75	191.5	0.223388
15JT04 62	154	94	92	82		183	10	3	7		94	10		153225	179.48	10.77	257814	<0.214	9.21	<0.153	<0.92	1.77	0.42	13.03	4.99	60.69	23.95	106.9	23.51	230.26	40.4	10813.3	113.91	168.12	0.267368
15JT04 63	n.a.	89	94	88		213	11	3	9		89	11		153225	181.43	5.59	254654	<0.225	13.61	<0.187	<1.39	3.33	0.66	16.47	5.97	72.95	27.4	122.75	27.27	275.91	51.72	10974.1	83.85	146.32	0.272455
15JT04 64	384	345	340	343		21	5	4	6		345	5		153225	263.35	7.25	251430	<0.217	18.13	0.292	6.73	12.62	1.84	64.54	22.13	263.15	97.6	416.34	83.55	770.89	131.45	9640.59	383.46	488.42	0.197103
15JT04 65	100	118	119	129		121	8	3	10		118	8		153225	119.57	<3.19	254482	<0.251	8.89	<0.176	<1.28	<1.38	<0.34	4.61	1.9	25.52	11.29	60.06	16.06	189.07	41.03	11726	69.18	214.44	n.a.
15JT04 66	29	91	93	90		214	12	4	8		91	12		153225	202.68	6.86	252291	<0.238	15.89	<0.235	1.28	3.26	0.85	18.04	6.99	84.54	33.39	161.44	37.76	379.48	69.89	11245	151.09	193.44	0.338853
15JT04 67	309	341	346	327		25	6	4	7		341	6		153225	974.19	9.27	254267	<0.24	6	0.23	3.87	8.06	<0.27	44.8	18.44	242.97	97.4	441.9	95.82	898.1	156.99	11570.7	351.17	477.68	n.a.
15JT04 68	288	302	304	294		36	7	4	10		302	7		153225	256.32	9.08	249545	<0.235	5.6	<0.163	1.2	2.85	<0.32	18.87	7.2	94.02	37.06	166.99	35.84	338.92	60.97	10472	125.43	308.61	n.a.
15JT04 69	137	92	90	92		74	4	2	3		92	4		153225	269.97	4.27	256181	<0.255	19.88	0.229	3.25	7.88	1.14	40.47	13.73	159.1	59.49	265.97	60.02	610.32	112.37	13127.8	438.09	535.17	0.195162
15JT04 70	139	93	91	77		462	29	5	17		93	29		153225	145.61	12.66	257291	<0.218	5.72	<0.165	<1.19	<1.34	<0.31	6.17	2.15	29.91	11.71	55.43	13.16	134.61	25.33	10319.8	31.31	52.12	n.a.
15JT04 71	225	178	175	212		386	42	10	28		178	42		153225	98.48	4.34	264037	<0.222	4.89	<0.177	0.88	1.52	0.64	7.65	2.68	33.65	14.6	74.92	19.12	221.72	49.67	9542.96	24.6	38.14	0.573782
15JT04 72	371	129	116	121		149	12	4	10		129	12		153225	157.04	5.8	255802	0.34	11.56	0.22	2.03	3.29	0.4	18.05	6.11	74.2	27.83	118.05	25.12	236.79	42.45	7599.43	80.74	125.26	0.158688
15JT04 73	n.a.	89	97	108		739	48	11	25		89	48		153225	418.97	14.29	251515	<0.273	7.39	<0.231	1.48	4.24	0.49	26.73	9.95	116.97	43.93	186.13	39.18	374.99	65.78	10530.3	107.96	94.15	0.140713
15JT04 74	317	339	342	349		28	6	4	10		339	6		153225	487.19	3.66	248726	<0.233	3.35	<0.181	1.51	5.24	<0.37	31.1	12.05	144.52	56.28	241.83	52.57	501.78	87.32	11108.2	154.55	376.4	n.a.
15JT04 75	n.a.	47	51	49		151	4	1	3		47	4		153225	162.71	6.58	253588	<0.219	17.72	<0.162	2.12	4.54	1.26	19.87	6.43	79.38	30.85	138.17	33.11	339.48	67	9115.14	359.96	417.05	0.405567
15JT04 76	341	356	358	359		32	8	5	9		356	8		153225	328.86	10.19	248522	<0.219	4.96	0.212	3.85	6.99	0.51	40.5	14	161.72	59.45	249.78	51.97	465.74	81.39	9124.29	176.44	292.51	0.0926667
15JT04 77	370	332	327	304		57	12	6	17		332	12		153225	279.73	45.54	254438	<0.22	2.82	<0.174	1.08	1.93	<0.26	15.64	5.6	74.03	29.52	134.53	29.74	292.53	54.66	11770.9	65.25	172.64	n.a.
15JT04 78	318	357	363	365		36	8	5	12		357	8		153225	247.18	7.46	256471	<0.247	6.79	<0.215	<1.32	2.39	<0.36	14.47	6.15	80.52	34.11	159.37	35.13	349.17	65.2	10223.2	105.39	274.19	n.a.
15JT04 79	100	89	89	88		100	5	2	4		89	5		153225	224.12	22.41	256984	<0.27	10.18	0.3	4.53	8.52	1.15	33.79	12.1	132.78	48.98	203.22	42.02	383.04	67.32	9979.75	316	347.26	0.207207
15JT04 80	n.a.	85	88	92		190	9	3	6		85	9		153225	203.31	8.54	257771	<0.260	10.27	0.196	3.54	5.14	1.06	25.68	8.89	107.33	41.94	187.32	40.89	399.33	74.86	10386.3	150.88	191.82	0.282063
15JT04 81	394	335	327	342		69	13	6	11		335	13		153225	97	<2.87	253311	<0.245	6.02	<0.169	1	1.91	0.46	10.35	3.93	48.81	20.59	104.12	26.15	287.66	57.7	9648.32	123.41	122.59	0.316294
15JT04 82	291	306	307	312		18	4	4	6		306	4		153225	472.83	4.34	258451	<0.23	7.94	0.135	1.16	3.28	0.29	26.85	11.02	141.89	57.42	263.03	57.61	531.04	89.37	11285.5	321.62	737.31	0.0944731
15JT04 83	451	366	353	350		33	8	5	12		366	8		153225	443.08	5.16	253266	<0.212	2.49	<0.171	2.08	4.77	<0.35	32.17	11.76	137.44	51.9	226.27	48.26	452.42	80.89	11108.2	111.46	266.4	n.a.
15JT04 84	176	102	99	79		419	31	9	16		102	31		153225	286.03	13.98	247514	<0.27	9.6	<0.20	3.18	3.39	0.7	17.21	6.32	77.77	28.01	120.68	25.42	245.02	46.58	8938.93	74.8	69.62	0.280174
15JT04 85	393	311	300	329		25	6	4	8		311	6		153225	307.89	154.92	246646	0.65	15.8	0.333	2.39	4.48	<0.39	25.81	9.8	120.28	49.24	217.87	48.36	474.96	87.24	9995.58	232.38	464.94	n.a.
15JT04 86	60	91	92	84		192	10	3	5		91	10		153225	270.22	15.78	251630	<0.211	10.13	0.345	4.14	6.84	1.19	37.02	12.76	151.8	58.17	252.28	54.67	513.91	93.23	8936.57	172.18	166.33	0.228623
15JT04 87	118	86	85	88		166	9	3	9		86	9		153225	81.67	3.23	252813	<0.227	6.94	<0.162	<1.00	<1.04	0.28	5.34	2.33	25.94	11.43	55.91	14.25	160.76	32.42	11563.7	95.37	207.53	n.a.
15JT04 88	304	318	320	356		36	7	4	15		318	7		153225	508.44	8.65	246639	<0.267	1.62	<0.183	1.18	3.45	<0.34	21.43	9.56	118.65	46.22	206.91	45.23	430.18	77.64	11322.8	70.08	296.29	n.a.
15JT04 89	170	93	89	75		311	18	4	14		93	18		153225	153.26	22.05	256205	<0.229	4.46	<0.158	<1.04	<1.41	0.38	8.77	3.18	36.42	13.93	61.12	13.32	131.71	23.45	10125	46.28	85.17	n.a.
15JT04 90	381	357	353	335		36	8	5	16		357	8		153225	300.92	6.1	253260	<0.32	1.94	<0.219	1.16	2.66	<0.31	17.79	6.84	81.16	28.47	121.29	25.69	241.53	42.2	11348	63.09	266.92	n.a.
15JT04 91	201	180	179	199		154	16	6	16		180	16		153225	207.08	4.27	239088	<0.198	8.79	<0.170	<0.74	1.25	0.48	6.72	2.61	36.05	15.19	77.39	19.85	228.99	44.7	10365.1	48.98	101.62	0.506315
15JT04 92	353	338	335	352		20	5	4	14		338	5		153225	249.18	3.11	244471	<0.193	2.43	<0.157	<1.03	<1.36	<0.28	7.53	3.4	51.31	22.46	110.15	27.13	272.19	49.84	12451.1	83.24	580.22	n.a.
15JT04 93	341	359	361	371		20	5	4	12		359	5		153225	899.41	6.05	245481	<0.190	1.07	<0.198	<1.12	3.95	<0.32	32.33	15.71	203.15	76.57	324.9	67.3	621.46	105.86	12284	100.28	528.7	n.a.
15JT04 94	376	334	327	351		42	9	6	13		334	9		153225	309.69	9.21	241819	1.28	9.8	0.58	5.13	9.99	1.29	47.32	16.75	185.54	71.44	296.64	61.47	611.18	99.06	8662.87	177.19	372.31	0.181386
15JT04 95	166	96	93	89		100	6	2	10		96	6		153225	141.9	<3.27	248145	<0.241	8.43	<0.162	<1.02	1.84	0.8	7.24	2.55	30.93	13.12	60.77	15.12	165.74	36.67	11581.5	76.28	351.82	0.670087
15JT04 96	394	364	359	426		102	22	11	31		364	22		153225	293.57	6.19	247212	<0.19	3.81	<0.23	<1.22	4.28	<0.33	16.31	6.29	79.08	30.43	138.41	29.09	278.27	51.36	9821.28	61.85	134.44	n.a.
15JT04 97	157	182	183	173		203	20	6	18		182	20		153225	129.73	5.68	250923	<0.250	4.45	<0.161	<1.10	1.41	0.39	6.85	2.56	31.35	13.19	64.15	16.33	180.06	38.26	8900.58	37.86	70.64	0.383645
15JT04 98	80	87	87	90		53	3	1	2		87	3		153225	248.22	22.58	246294	<0.173	13.28	0.407	6.57	9.05	1.14	38.11	13.04	151.85	59.38	246.02	50.85	463.26	81.9	8849.14	640.09	654.28	0.187664
15JT04 99	234	97	91	91		123	7	2	5		97	7		153225	221.21	24.04	254749	<0.169	7.3	0.341	3.73	6.8	1.02	27.37	9.08	99.4	37.39	150.35	30.95	287.26	49.53	9872.16	187.75	222.05	0.228574
15JT04 100	130	53	51	74		369	13	2	11		53	13		153225	99.16	<2.76	252741	<0.236	1.51	<0.161	<0.94	<1.23	0.6	7.63	2.6	30.95	11.75	53.98	12.47	132.27	26.88	7786.69	45.66	121.44	n.a.
15JT05 01	n.a.	98	102	97		189	10	3	8		98	10		153225	159.97	19.44	247424	<0.114	4.37	<0.089	0.75	2.26	0.208	6.96	2.81	31.57	11.59	54.44	11.15	105.54	19.62	10135.3	51.33	89.61	0.160333
15JT05 02	159	178	180	186		104	10	3	8		178	10		153225	148.91	7	252248	<0.096	6.08	0.109	1.13	2.5	0.789	11.92	4.57	57.61	23.13	116.15	27.21	291.53	59.6	9365	38.97	61.06	0.441864
15JT05 03	360	305	298	246		11	2	3	13		305	2		153225	28.26	2.76	244105	<0.116	<0.111	<0.080	<0.43	<0.65	0.11	<0.49	<0.070	0.9	0.413	1.88	0.467	4.67	0.829	11184.7	20.61	925.12	n.a.
15JT05 04	n.a.	86	90	98		91	5	2	3		86	5		153225	179.55	8.01	251082	<0.10	7.65	<0.084	2.77	5.27	0.847	23.26	7.95	93.95	36.21	158.89	34.04	342	60.4	9642.19	120.02	136.6	0.23388
15JT05 05	361	379	382	390		11	3	4	11		379	3		153225	583.06	2.58	245267	<0.093	0.784	<0.069	<0.49	2.12	<0.148	17.09	8.21	114.21	43.24	199.28	45.78	483.34	89.18	13017.5	37.89	615.95	n.a.
15JT05 06	260	184	178	194		49	6	3	7		184	6		153225	92.7	3.26	251847	<0.101	6.01	<0.062	<0.43	<0.52	0.299	3.24	1.191	19.53	8.45	50.14	13.85	180.69	42.92	12289.1	40.71	105.75	n.a.
15JT05 07	55	90	91	92		55	3	1	3		90	3		153225	154.47	5.93	248066	<0.079	7.84	<0.067	0.7	1.74	<0.135	8.15	3.05	41.05	16.33	80.28	18.38	195.28	37.24	13547.1	86.95	209.02	n.a.
15JT05 08	n.a.	43.3	45.9	45.6		20	0.7	0.5	0.6		43.3	0.7		153225	160	3.38	248068	<0.075	67.16	0.188	3.17	5.57	1.85	23.62	7.72	90.22	34.27	161.16	36.97	400.43	76.42	10078.6	1202.89	1290.36	0.493087
15JT05 09	316	362	370	371		11	3	4	5		362	3		153225	337.63	3.81	247829	<0.113	4.21	<0.100	1.88	5.23	0.358	29.15	10.83	125.81	47.1	210.06	44.2	426.38	76.6	10852.4	149.91	529.53	0.0886405
15JT05 10	239	192	188	218		87	9	3	10		192	9		153225	238.35	2.45	248691	0.245	4.82	<0.055	<0.46	0.86	0.394	2.71	1.248	16.23	6.8	37.54	10.99	143.78	32.47	11045.4	32.37	81.84	0.789009
15JT05 11	182	98	95	93		153	9	3	7		98	9		153225	169.93	6.93	244238	<0.068	6.94	0.074	1.35	3.43	0.93	18.23	5.95	72.47	26.31	117.74	25.01	255.15	45.06	8411.59	45.41	74.02	0.359552
15JT05 12	235	183	180	199		129	13	5	13		183	13		153225	371.03	31.69	218991	0.648	7.04	0.181	1.39	1.51	0.479	9.41	3.24	41.26	17.5	87.08	20.72	225.48	43.86	8396.84	26.69	45.83	0.388483
15JT05 13	n.a.	91	96	93		65	4	2	2		91	4		153225	269.66	17.8	243462	0.115	13.54	0.461	6.45	10.58	0.948	40.75	13.04	135.37	45.78	188.72	37.64	343.57	57.65	9440.3	180.05	180.97	0.139579
15JT05 14	n.a.	44.5	45.4	43.8		23	0.9	0.5	0.6		44.5	0.9		153225	154.24	4.13	245681	0.103	54.47	0.265	4.56	8.89	2.34	33.62	10.64	120.92	43.31	195.81	43.63	451.13	81.32	9738.68	1020.09	965.18	0.413795
15JT05 15	202	128	124	117		11	1	1	1		128	1		153225	252.9	8.94	247090	0.089	22.94	0.094	2.14	7.56	0.32	44.69	16.68	197.45	73.06	304.94	62.17	567.89	95.13	8510.54	421.1	589.14	0.0532235
15JT05 16	360	362	363	344		10	3	4	6		362	3		153225	1161.4	3.75	242853	<0.111	1.029	<0.082	1.33	4.47	<0.148	34.44	16.82	237.49	96.71	441.1	92.79	853.23	143.11	12199.7	99.54	507.08	n.a.
15JT05 17	128	95	94	90		105	6	2	3		95	6		153225	221.45	14.72	249381	<0.104	9.45	0.362	5.27	7.23	1.326	32.8	10.09	112.87	40.11	174.52	35.94	354.95	63.58	8722.01	111.08	116.22	0.263243
15JT05 18	233	193	190	203		124	13	4	13		193	13		153225	96.18	4.65	242520	<0.076	2.65	<0.066	<0.31	<0.41	0.367	3.43	1.221	15.82	6.63	34.92	9.16	111.23	26.2	9293.75	15.71	38.35	n.a.
15JT05 19	477	407	395	391		11	2	4	5		407	2		153225	1494.66	7.49	246321	<0.106	2.26	0.137	2.28	5.98	0.186	42.58	20.85	296.2	120.94	565.29	122.52	1164.8	201.23	11495.6	173.84	780.68	0.0356352
15JT05 20	270	189	183	195		78	9	4	7		189	9		153225	200.09	7.17	246678	<0.093	9.22	0.116	1.16	3.95	0.935	19.85	6.98	85.01	33.08	151.32	33.34	343.36	65.53	9490.14	53.58	71.82	0.322814
15JT05 21	n.a.	44.1	46.1	46.6		18	0.8	0.6	0.8		44.1	0.8		153225	204.76	4.43	245427	0.617	52.19	0.258	3.36	5.7	1.65	23.38	7.91	93.61	33.99	157.08	35.37	386.41	70.77	10121.2	830.14	946.84	0.436962
15JT05 22	193	98	94	95		63	4	2	3		98	4		153225	187.19	8.01	250441	<0.072	8.38	0.106	1.36	2.79	0.36	14.77	5.67	73.41	29.18	134.73	28.68	282.59	51.66	11197.7	157.56	184.67	0.171447
15JT05 23	182	191	192	187		85	9	3	7		191	9		153225	258.76	10.32	247503	<0.113	6.93	0.077	0.84	2.43	0.639	13.95	5.48	68.71	27.69	132.6	29.97	316.15	60.93	9299.57	38.1	59.15	0.335529
15JT05 24	395	361	357	372		11	3	4	6		361	3		153225	199.59	3.7	242995	0.132	10.04	<0.090	0.5	1.31	0.183	7.71	3.18	46.02	19.09	96.79	22.82	244.22	46.4	10776.6	119.64	296.38	0.176039
15JT05 25	422	382	376	386		12	4	4	6		382	4		153225	233.96	17.65	234024	0.104	4.22	0.107	1.79	3.34	0.175	21.84	7.8	93.76	34.85	159.73	33.87	331.09	57.68	8657.37	111.24	263.98	0.0626409
15JT05 26	332	362	367	374		11	3	4	6		362	3		153225	1150.19	7.91	241677	<0.095	2.44	0.124	2.35	7.29	0.333	47.3	19.03	237.31	88.28	391.8	83.6	823.82	142.24	10889.8	85.63	440.75	0.0548238
15JT05 27	317	319	320	370		11	3	3	6		319	3		153225	780.6	11.11	245163	0.131	2.09	0.243	4.39	9.57	0.23	49.35	16.95	186.53	67	287.91	60.47	590.93	102.76	10376.1	90.76	440.69	0.0323555
15JT05 28	215	100	95	96		53	3	1	3		100	3		153225	171.22	14.62	251277	<0.110	7.54	<0.067	0.68	1.83	0.327	14.15	5.68	69.33	26.95	123.17	26.44	256.69	46.29	10439.7	116.63	191.3	0.196455
15JT05 29	11	47	47.7	101		47	2	0.6	2		47	2		153225	74.35	2.87	247238	<0.081	16.82	<0.063	0.42	1.28	0.35	4.42	1.57	18.56	7.72	37.38	9.46	110.16	22.85	11552.8	185.31	447.16	0.449854
15JT05 30	151	95.3	93.2	102		11	0.9	1	2		95.3	0.9		153225	20.61	1.9	242255	0.297	41.33	0.511	4.25	3.02	0.844	9.07	2.82	33.39	12.95	64.54	15.83	186.14	37.66	10604.4	345.67	1556.34	0.493009
15JT05 31	169	190	192	192		80	8	3	7		190	8		153225	197.89	7.17	247208	<0.108	7.2	<0.073	1.72	3.85	1.22	22.38	7.42	93.68	36.86	169.88	37.8	393.46	76.09	8724.19	48.48	67.61	0.401808
15JT05 32	204	92	88	100		82	5	2	4		92	5		153225	189.96	18.14	254425	<0.065	7.63	<0.065	1.04	2.34	0.707	16.99	6.32	73.55	27.6	123.74	25.72	250.31	43.11	10461.4	125.96	178.43	0.342795
15JT05 33	394	378	376	375		36	4	4	4		378	4		153225	940.89	2.63	242495	<0.094	2.36	<0.062	1.15	3.66	0.126	29.61	13.61	193.55	82.42	400.82	92.16	964.23	176.07	12255	125.74	725.94	0.0370024
15JT05 34	76	45	44.9	44.8		96	2	0.5	0.4		45	2		153225	150.52	4.75	248981	0.518	57.21	0.228	2.49	5.08	1.48	20.62	7.09	80.15	29.98	140.39	32.53	345.92	65.72	10481.7	873.7	1094.88	0.442084
15JT05 35	173	94	91	74		141	8	3	8		94	8		153225	177.2	15.02	250136	<0.103	7.33	<0.074	1.52	3.4	0.435	18.14	6.2	73.8	27.31	119.08	25.44	237.52	41.58	10593	135.58	210.1	0.169337
15JT05 36	278	182	175	225		123	13	5	15		182	13		153225	143.34	6.6	261385	<0.069	5.64	0.051	0.71	1.94	0.77	6.24	2.67	32.48	15.57	86.27	23.7	304.05	66.67	9667.55	34.75	65.09	0.676577
15JT05 37	33	92	94	95		149	6	2	2		92	6		153225	230.02	22.17	248524	<0.100	9.33	0.211	4.97	8.36	0.9	34.34	10.55	115.09	39.25	161.26	32.18	297.2	50.68	9007.73	166.26	179.47	0.16239
15JT05 38	81	45.7	45.1	48.2		27	0.9	0.5	0.8		45.7	0.9		153225	289.53	5.69	241542	1.155	51.42	0.362	2.73	3.81	0.55	15	5.13	56.92	21.22	96.8	22.34	230.64	43.17	10397.3	686.54	933.26	0.22242
15JT05 39	469	361	345	392		10	3	3	5		361	3		153225	234.4	382.77	218073	<0.110	4.29	<0.075	0.89	1.38	<0.117	9.59	4	55.28	22.89	110.82	24.94	252.65	46.49	10122.7	195.96	471.33	n.a.
15JT05 40	369	319	313	287		11	3	3	6		319	3		153225	462.5	54.12	244778	<0.102	2.44	<0.079	1.13	2.25	<0.128	15.76	6.97	94.59	37.78	187.64	45.09	494.21	89.39	12657.3	72.39	556.39	n.a.
15JT05 41	209	191	190	204		91	10	4	9		191	10		153225	136.26	3.95	256846	<0.086	4.15	<0.044	0.38	1.33	0.53	4.88	1.98	25.44	10.82	61.97	15.66	208.95	42.45	9791.94	26.4	56.13	0.636004
15JT05 42	238	199	196	192		59	7	3	7		199	7		153225	154.81	5.41	247992	<0.111	5.38	<0.077	0.6	1.21	0.393	5.2	1.927	27.54	12.4	70.97	19.09	241.72	55.87	9140.58	47.72	93.26	0.47898
15JT05 43	220	181	178	225		112	11	4	12		181	11		153225	155.26	7.03	243376	<0.086	5.44	<0.062	<0.41	0.94	0.491	7.34	2.8	35.76	15.06	78.94	19.98	240.96	50.02	8597.86	22.76	50.9	0.571464
15JT05 44	213	98	93	95		50	3	1	2		98	3		153225	190.65	13.05	249905	<0.083	10.14	0.264	4.47	7.36	0.999	31.48	10.43	118.55	44.37	192.94	40.5	393.66	69.37	9256.34	182.85	183.7	0.200645
15JT05 45	116	93	93	102		122	7	3	5		93	7		153225	159.71	7.75	249784	<0.081	9.36	0.073	0.75	2.62	0.58	18.67	6.64	82.02	30.51	137.91	29.58	288.16	48.96	10556.1	107.91	128.33	0.253527
15JT05 46	160	48.4	46.2	50.1		21	0.9	0.6	0.8		48.4	0.9		153225	152.59	3.67	246447	0.243	56.06	0.196	3.23	6.29	1.72	25.6	8.21	93.15	34.68	158.15	36.15	386.25	69.78	9959.19	956.64	1072.51	0.414384
15JT05 47	452	379	368	360		15	5	4	6		379	5		153225	263.78	8.6	246794	<0.067	17.54	<0.070	1.93	4.89	0.483	27.13	9.01	113.55	41.96	182.91	39.15	373.72	65.68	9372.7	81.69	154.79	0.1282
15JT05 48	308	366	375	382		11	3	4	6		366	3		153225	1019.73	5.01	250342	<0.084	1.214	<0.062	0.73	3.68	0.107	26.17	13.44	191.04	79.81	382.12	84.24	824.17	141.23	11894.7	86.86	409.95	0.0333332
15JT05 49	20	47	47.8	47.8		84	2	0.6	0.5		47	2		153225	174.77	3.68	245747	0.103	50.9	0.157	2.91	5.27	1.55	19.52	6.92	79.75	29.1	135.24	30.66	324.22	59.88	9910.49	985.07	1004.42	0.467203
15JT05 50	236	185	181	172		91	9	3	9		185	9		153225	129.65	4.24	244035	<0.066	6.14	<0.081	<0.47	0.85	0.35	5.03	2.003	26.48	11.25	58.71	15.26	179.26	37.47	9585.22	31.21	60.58	0.517481
15JT05 51	113	46	44.6	48		35	1	0.6	1		46	1		153225	140.74	3.4	244569	<0.079	43.79	0.173	2.56	4.92	1.49	20.24	6.75	77.28	29.11	133.88	31.12	326.4	60.02	10116.4	672.82	846.01	0.456476
15JT05 52	323	46	41.2	55		58	2	0.8	2		46	2		153225	83.24	3.64	238392	0.176	48.77	0.219	4	7.74	2.58	29.6	8.84	92.77	33.33	144.69	35.9	396.69	68	9799.37	803.79	1045.28	0.521102
15JT05 53	n.a.	87	92	93		14	1	1	1		87	1		153225	165.29	3.95	248906	<0.083	9.25	<0.050	1.3	2.96	0.418	14.25	5.38	69.13	28.57	140.41	32.55	350.67	66.46	10436.5	499.3	1141	0.196763
15JT05 54	249	187	182	181		76	8	3	8		187	8		153225	239.33	9.66	251415	<0.112	7.87	<0.064	1	2.08	0.754	10.72	4.05	56.3	25.89	139.6	35.33	402.57	87.95	7961.13	34.13	78.04	0.488159
15JT05 55	n.a.	43	43.9	46		29	1	0.6	1		43	1		153225	240.09	7	256757	0.098	68.67	0.28	4.84	7.38	1.58	30.02	8.75	96.9	33.61	150.12	34.53	344.65	61.06	9503.68	868.38	933.31	0.324521
15JT05 56	276	102	95	95		20	2	1	2		102	2		153225	200.12	1.44	248514	<0.086	15.18	0.082	0.98	2.25	0.905	12.73	4.33	57.54	23.37	116.22	26.47	299.64	60.83	9689.87	201.32	551.32	0.516967
15JT05 57	58	47	46.8	50.5		33	1	0.6	0.8		47	1		153225	373.95	3.48	242386	0.713	60.51	0.405	3.02	6.62	1.62	21.86	7.33	86.53	31.87	148.94	34.29	350.92	66.72	9511.48	1219.77	1078.12	0.4117
15JT05 58	269	367	383	379		12	4	4	4		367	4		153225	405.72	6.7	246702	<0.090	8.82	0.224	4.03	6.6	0.648	36.94	13.57	165.23	61.92	263.81	53.32	493.99	81.58	9919.22	282.21	272.31	0.126874
15JT05 59	192	95	91	91		44	3	1	2		95	3		153225	258.51	11.01	248945	0.132	17.46	0.296	4.03	7.48	0.796	35.94	11.87	134.81	48.62	210.6	42.99	409.67	69.79	10289.8	276.81	262.25	0.14842
15JT05 60	76	92.1	92.7	96		11	0.8	1	1		92.1	0.8		153225	184.6	6.42	247282	<0.089	9.9	<0.056	<0.54	1.8	0.475	12.38	4.55	56.3	21.87	101.76	23.77	240.63	43.64	10412.2	920.7	2015.14	0.307621
15JT05 61	352	367	369	370		39	4	4	4		367	4		153225	540.9	3.01	242800	0.204	5.24	0.101	1.43	3.03	0.148	18.65	8.27	114.43	47.36	223.84	52.04	553.68	98.24	11804.2	142.33	659.85	0.0601895
15JT05 62	379	369	367	367		43	5	4	4		369	5		153225	1373.8	15.42	246311	<0.071	0.72	<0.065	0.93	2.36	<0.108	27.87	15.71	239.57	101.29	498.53	111.75	1110.42	181.01	12274.8	67.1	644.55	n.a.
15JT05 63	245	202	199	176		62	7	3	6		202	7		153225	197.53	6.8	246001	<0.074	8.05	0.112	1.4	3.19	0.91	18.47	6.5	81.98	32.4	154.13	35.58	369.92	71.16	9139.67	46.97	70.6	0.362437
15JT05 64	49	44	44	44		103	2	0.6	0.5		44	2		153225	221.56	5.81	251917	0.158	57.51	0.075	2.2	5.05	1.67	19.23	6.94	82.66	30.72	144.62	33.19	355.72	63.34	9906.51	958.55	1049.92	0.518084
15JT05 65	151	186	189	183		84	8	3	8		186	8		153225	200.2	8.12	248660	<0.092	6.19	0.069	0.62	1.99	0.732	9.26	3.69	47.16	21.6	115.13	28.77	324.94	71.09	8875.78	31.25	69.48	0.521313
15JT05 66	223	93	88	96		59	4	2	3		93	4		153225	204.59	9.45	254911	0.123	11.55	0.129	1.77	4.62	0.79	20.93	7.57	95.83	36.52	163.93	36.09	357.11	64.54	9732.88	142.52	214.86	0.245607
15JT05 67	n.a.	46	47.7	45		34	1	0.7	1		46	1		153225	193.12	6.8	248207	0.143	57.51	0.164	2.79	5.52	1.38	20.43	6.27	72.55	27.78	124.31	27.81	285.39	53.6	9004.84	800.59	795.12	0.397278
15JT05 68	123	49	47.1	46.9		157	3	0.7	0.5		49	3		153225	125.75	6.55	248254	0.102	33.04	0.198	2.87	4.37	2.13	16.66	5.36	57.64	20.78	90.46	20.21	207.78	38.66	7339.24	621.61	432.56	0.763169
15JT05 69	235	189	185	189		38	5	3	5		189	5		153225	195.43	5.41	250953	<0.079	8.77	<0.062	<0.35	1.5	0.471	8.39	3.12	39.7	17.13	92.04	24.61	293.9	62.77	9842.59	85.6	150.75	0.405895
15JT05 70	73	92	92	92.6		90	3	1	0.9		92	3		153225	199.44	14.58	248180	<0.110	9.36	0.334	5.38	7.91	1.29	31.9	10.43	118.77	45.45	201.72	41.83	394.62	70.5	8698.06	414.22	541.12	0.248271
15JT05 71	84	90	91	106		136	7	2	4		90	7		153225	187.42	11.97	252307	<0.090	5.74	<0.059	0.8	1.73	0.338	11.99	4.08	51.04	20.08	90.96	20.4	201.67	36.91	9287.33	53.54	79.57	0.226884
15JT05 72	n.a.	87	90	91		107	4	1	2		87	4		153225	203.7	14.13	253363	<0.085	11.85	0.132	2.81	6.42	0.895	29.99	9.55	107.31	37.05	153.48	31.95	302.66	49.79	10336.6	245.2	279.37	0.197191
15JT05 73	66	47	46.5	50.5		30	1	0.6	0.8		47	1		153225	79.26	3.18	245952	<0.068	36.04	0.158	1.7	3.96	0.95	14.55	5.13	56.11	20.91	101.64	23.16	279.07	50.39	10653.7	515.84	803.32	0.382617
15JT05 74	243	185	180	195		57	6	3	6		185	6		153225	162.2	9.12	245785	<0.075	6.61	<0.072	0.69	1.59	0.607	9.06	3.45	44.98	18.59	91.26	22.06	249.67	49.44	9637.01	49.47	87.86	0.488929
15JT05 75	39	95	97	88		63	4	2	4		95	4		153225	155.7	9.3	248621	<0.072	5.26	<0.053	<0.37	0.9	0.23	5.34	2.19	27.52	11.16	52.46	12.27	131.27	23.79	9818.5	58.13	141.72	0.320742
15JT05 76	267	202	196	210		102	11	4	10		202	11		153225	151.77	10.04	252882	<0.082	5.24	0.068	<0.41	0.65	0.495	6.89	2.76	34.35	14.36	71.86	18.27	208.41	41.1	9360.36	25.14	49.37	0.715086
15JT05 77	77	46.5	45.9	45.2		19	0.7	0.5	0.6		46.5	0.7		153225	117.59	4.43	251263	0.12	63.01	0.167	1.8	4.17	1.168	17.38	5.79	66.86	25.78	126.91	30.65	344.37	66.01	10648.1	948.27	1377.09	0.41944
15JT05 78	61	92	94	92		14	1	1	1		92	1		153225	424.49	7.47	250556	<0.105	87.3	0.472	7.47	13.48	5.99	66.87	22.42	275.53	108.54	518.46	123.05	1310.94	253.03	8033.43	1404.08	939.14	0.609938
15JT05 79	31	91	93	98		34	2	1	2		91	2		153225	178.43	11.35	249760	0.099	9.29	0.078	2.09	5.54	0.676	25.72	8.78	98.11	34.08	143.83	29.7	279.98	46.5	10866.4	250.46	344.21	0.173131
15JT05 80	413	367	361	406		10	3	4	6		367	3		153225	443.04	11.64	248418	<0.068	3.76	0.086	1.11	3.16	0.136	20.03	7.72	106.99	41.25	189.08	42.71	420.37	70.26	10576.7	151.6	445.58	0.0522606
15JT05 81	277	300	303	299		35	7	4	9		300	7		153225	110.38	2.73	260128	<0.093	5.43	<0.083	<0.31	0.69	0.24	3	1.179	17.52	8.11	45.1	12.47	156.56	37.52	9968.98	41.78	95.01	0.509971
15JT05 82	37	44	44	47		39	1	0.6	1		44	1		153225	164.01	4.35	260014	0.118	68.47	0.139	3.33	6.36	2.32	27.64	9.35	100.1	39.59	173.86	40.15	432.01	76.82	10323.6	1153.87	1261.2	0.534946
15JT05 83	153	184	187	175		126	12	4	11		184	12		153225	170.02	7.63	258469	<0.092	5.07	<0.065	0.64	<0.74	0.61	6.85	2.7	34.37	16.26	85.43	22.56	278.73	61.74	8138.39	22.95	44.69	n.a.
15JT05 84	126	45	43.8	50		41	1	0.7	1		45	1		153225	220.64	7.61	256167	1.114	57.22	0.455	4.87	6.74	1.79	24.56	7.9	87.74	31.92	142.21	31.18	318.82	57.97	9610.2	757.81	812.7	0.425332
15JT05 85	323	360	365	378		11	2	4	4		360	2		153225	468.47	4.19	250922	<0.061	5.5	<0.057	1.77	4.23	0.145	29.68	12.17	158.81	62.29	283.24	61.77	595.69	103.81	11336.3	267.57	678.41	0.0395626
15JT05 86	27	92	94	91		26	2	1	1		92	2		153225	298.85	13.19	250731	<0.093	18.12	0.229	3.69	7.75	1.12	42.35	15.47	191.48	74.56	330.42	69.99	667.41	120	9983.79	522.23	436.74	0.188999
15JT05 87	177	192	193	190		55	6	3	4		192	6		153225	179.73	5.13	255988	<0.093	9.3	0.098	1.18	2.47	0.876	15.03	5.43	68.97	27.34	128.66	30.32	321.18	62.3	10251	83.94	110.67	0.439537
15JT05 88	258	183	177	184		37	4	2	5		183	4		153225	168.63	6.4	251672	<0.108	7.25	<0.060	0.59	1.07	0.555	7.77	2.94	41.12	18.02	96.09	24.78	290.58	61.49	9480.24	78.66	142.13	0.588451
15JT05 89	n.a.	87	91	87		67	4	1	3		87	4		153225	141.05	17.5	249455	<0.072	5.6	0.073	1.24	2.7	0.436	12.98	4.53	53.22	19.44	85.37	17.9	176.16	29.86	9726.72	101.91	154.8	0.225158
15JT05 90	227	184	180	202		102	10	4	9		184	10		153225	234.51	7.89	254552	<0.080	6.94	<0.054	1.12	2.1	0.828	14.01	5.15	66.51	28.19	136.5	32.08	347.79	68.98	8562.74	32.23	54.45	0.466682
15JT05 91	89	46	45.3	46		37	1	0.6	1		46	1		153225	142.46	4.18	247967	<0.077	45.11	0.115	2.42	4.64	1.29	19.4	6.58	77.83	29.47	134.35	31.09	334.08	59.05	10034.4	747.2	898.39	0.415671
15JT05 92	66	93	94	98		67	4	2	2		93	4		153225	196.49	10.31	252233	0.103	8.83	0.094	1.7	4.09	0.727	21.42	7.58	93.21	35.79	159.3	34.21	335.2	59.2	9906.02	140.93	148.77	0.237456
15JT05 93	57	94	96	94		59	4	2	2		94	4		153225	261.26	12.96	254011	0.116	18.58	0.35	5.38	7.62	1.22	36.08	12.33	141.22	51.89	220.34	44.26	406.98	70.56	9737.16	264.9	200.54	0.224941
15JT05 94	229	190	187	196		32	4	3	4		190	4		153225	678.07	14.77	248390	0.252	10.06	0.131	1.05	1.93	0.515	7.62	3.44	43.16	19.78	105.85	28.13	327.06	73.32	9707.37	100.41	153.22	0.410554
15JT05 95	175	98	95	105		31	2	1	2		98	2		153225	211.52	23.11	238539	<0.088	14.31	0.208	2.84	6.78	0.81	33.98	11.89	140.45	52.29	225.5	46.07	429.32	73.99	8975.16	377.71	362.97	0.163147
15JT05 96	126	95	94	95		27	2	1	2		95	2		153225	277.13	12.19	258310	<0.097	15.43	0.126	1.85	3.66	0.4	18.96	6.81	81.51	30.48	135.76	29.75	285.92	51.16	10929.1	326.58	398.51	0.146798
15JT05 97	1220	80	47.5	67		15	1	0.6	1		80	1		153225	201.4	42.41	251245	0.288	57.26	0.218	2.52	4.05	1.14	18.62	6.22	75.5	29.53	142.17	34.35	355.06	67.61	10220.4	733.04	969.55	0.401335
15JT05 98	67	88	89	100		67	4	2	3		88	4		153225	273.81	12.92	257953	<0.090	10.44	0.102	1.66	3.03	0.574	18.4	6.52	78.43	31.56	138.85	31.44	311.46	55.85	9097.83	139.52	186.22	0.235018
15JT05 99	277	96	89	111		86	5	2	5		96	5		153225	147.05	10.6	258272	<0.076	10.1	0.069	1	1.48	<0.125	7.92	3.68	40.71	16.79	79.93	18.34	188.99	33.43	11975.3	72.8	128.88	n.a.
15JT05 100	364	234	221	195		16	3	2	3		234	3		153225	236.13	7.08	256469	<0.060	27.14	<0.054	1.12	2.52	0.152	13.97	5.26	66.73	26.58	122.21	29.05	303.96	51.15	11411.8	157.11	288.79	0.0783185
15JT06 01	10	122	128	133		17	2	1	2		122	2		153225	396.52	2.66	241740	0.845	40.34	0.47	5.3	10.2	0.749	64.93	25.65	299.63	110.72	456.5	90.13	794.66	134.93	8993.48	565.34	749.41	0.0889771
15JT06 02	177	118	115	118		11	0.8	1	1		118	0.8		153225	501.38	10.34	243161	0.096	46.48	0.255	2.56	6.32	1.84	44.94	18.91	256.04	107.91	507.75	117.74	1211.28	223.29	9665.45	2270.12	2868.78	0.333781
15JT06 03	237	346	363	369		11	3	4	6		346	3		153225	542.12	6.7	247238	<0.103	2.05	<0.065	1.12	2.93	0.125	23.53	9.66	124.03	47.49	212.1	46.13	455.07	81.41	11063.1	83.55	291.57	0.046024
15JT06 04	77	117	118	135		36	3	1	3		117	3		153225	217.27	2.89	248246	<0.096	17.68	0.252	4.62	8	0.523	46.57	15.3	178.46	65.8	274.52	55.12	522.88	88.09	7779.47	173.14	256.99	0.0828367
15JT06 05	421	354	344	349		14	4	4	5		354	4		153225	135.46	5.66	243475	<0.112	7.5	<0.069	0.45	1.44	0.313	8.52	3.39	41.8	17.76	84.57	19.79	210.74	39.71	10145.9	112.71	199.64	0.273189
15JT06 06	297	335	341	391		11	3	3	10		335	3		153225	392.33	6.48	247556	<0.076	2.76	<0.079	0.93	2.48	0.227	18.59	8.03	94.96	32.19	126.72	24.94	232.47	37.73	12174.7	47.39	400.09	0.102207
15JT06 07	138	102	100	100		82	5	2	4		102	5		153225	164.91	7.09	249082	<0.075	8.06	<0.064	<0.35	1.21	0.164	6.38	2.68	35.83	14.9	71.87	16.82	175.35	32.91	10656.4	60.18	118.07	0.180451
15JT06 08	n.a.	116	124	125		31	3	2	3		116	3		153225	208.31	3.82	246570	<0.087	16.83	0.263	4.86	8.59	0.486	40.58	14.28	165.03	61.36	258.6	52.25	482.29	83.31	7801.07	157.86	226.86	0.0795799
15JT06 09	377	359	357	357		10	3	4	5		359	3		153225	564.85	5.35	250930	<0.073	2.69	<0.079	1.5	3.65	<0.166	25.15	10.13	130	51.76	234.8	52.32	508.15	90.07	11407.6	129.88	382.56	n.a.
15JT06 10	194	91	88	98		110	6	2	5		91	6		153225	234.98	20.88	244829	<0.084	5.91	<0.070	0.56	2.44	0.269	12.22	4.66	54.66	21.41	91.64	19.78	206.98	34.94	9605.34	56.51	97.75	0.150606
15JT06 11	458	374	360	334		63	15	8	17		374	15		153225	196.61	7.61	246508	<0.116	2.31	0.227	4.4	7.45	0.609	37.45	12.58	136.83	49.09	200.68	41.32	387.64	67.19	8803.8	77.33	124.42	0.111464
15JT06 12	327	349	352	378		10	3	3	5		349	3		153225	967.05	5.53	242564	0.126	2.8	0.139	1.4	3.67	<0.130	28.19	13.63	191.97	80.99	381.6	84.2	810.48	138.19	11476.7	132.21	412.55	n.a.
15JT06 13	80	133	136	133		87	7	2	5		133	7		153225	155.21	5.39	244154	<0.086	3.4	0.128	2.41	5.2	1.41	29.77	10.16	113.82	41.37	172.33	34.47	329.89	58.78	6766.09	53.68	78.03	0.346456
15JT06 14	404	366	360	372		10	3	4	6		366	3		153225	856.89	7.21	244130	<0.100	1.76	<0.064	1.22	4.58	0.165	29.95	13.02	171.75	66.81	301.58	67.09	657.67	119.38	11188.2	70.77	362.85	0.0430697
15JT06 15	205	93	89	100		62	4	1	2		93	4		153225	239.96	17.23	248660	<0.070	14.89	0.352	5.9	10.79	1.29	40.15	12.28	136.72	47.13	190.18	39.65	372.65	61.33	10217.9	181.5	170.01	0.189477
15JT06 16	115	178	183	183		93	9	3	8		178	9		153225	220.92	8.19	246494	<0.079	7.92	<0.069	0.71	1.83	0.819	10.34	4.15	55.52	24.56	128.86	31.41	347.57	72.31	8026.71	32.63	55.34	0.575596
15JT06 17	145	52	50.5	54		53	2	0.7	1		52	2		153225	222.39	7.91	251458	<0.069	14.02	0.133	2.51	5.04	0.94	29.32	9.37	113.91	43.71	196.77	43	443.59	76.93	9300.67	288.66	342.39	0.236401
15JT06 18	116	178	183	199		66	7	3	7		178	7		153225	112.9	4.63	242693	<0.074	5.23	<0.061	<0.36	<0.51	0.299	3.51	1.216	17.76	8.24	43.42	12.17	156.84	33.81	10191.2	35.69	83.3	n.a.
15JT06 19	363	359	358	365		10	2	3	4		359	2		153225	433.34	4.12	247686	0.14	8.3	0.1	1.15	2.67	0.106	17.88	8.07	109.69	43.99	198.74	43.15	412.95	70.45	11487.7	261.07	574.34	0.0469014
15JT06 20	409	375	369	409		12	4	4	5		375	4		153225	137.49	3.61	247648	<0.093	7.57	0.114	1.8	3.23	0.828	18.72	6.16	70.32	26.88	117.76	26.36	254.39	46.92	10232.4	110.95	170.58	0.325533
15JT06 21	360	355	354	373		10	3	3	5		355	3		153225	782.05	6.5	246019	<0.092	2.28	0.094	1.98	5.88	0.257	37.23	15.98	218.27	86.79	385.67	81.29	755.28	128.01	11457.5	159.8	391.57	0.0531028
15JT06 22	116	126	126	131		60	5	2	4		126	5		153225	233.65	<1.13	248241	0.108	15.18	0.136	1.85	4.51	0.212	20.12	7.08	85.68	32.57	139.88	29.21	270.99	48.86	8824.58	84.19	152.51	0.0680382
15JT06 23	134	87	85	88		52	3	1	2		87	3		153225	272.55	7.45	248187	<0.078	10.55	0.179	2.92	6.09	1.056	24.54	8.15	96.99	36.35	158.89	34.08	337.14	59.46	9587.59	147.58	189.94	0.264081
15JT06 24	67	84	85	112		199	10	3	8		84	10		153225	243.44	20.96	241475	<0.119	5.94	0.139	2.48	5.14	0.59	17.78	6.22	66.67	22.46	97.5	19.7	192.16	34.39	9055.16	74.61	95.07	0.188679
15JT06 25	143	127	126	131		77	6	2	4		127	6		153225	272.64	8.55	240576	0.217	4.97	0.413	5.61	13.81	5.45	66.26	20.94	223.39	80.92	321.65	64.23	587.07	105.7	6043.77	97.95	111.06	0.550799
15JT06 26	346	361	364	390		10	3	4	4		361	3		153225	259.39	9.09	243551	<0.093	5.96	0.238	4.36	8.75	0.501	44.77	15.8	188.19	67.61	282.95	57.33	529.31	88.55	9780.2	217.26	364.18	0.0773855
15JT06 27	56	107	109	115		165	10	3	7		107	10		153225	202.35	11.02	241922	0.106	10.55	<0.054	0.7	2.07	0.59	10.4	3.73	47.6	18.28	85.76	18.53	187.73	34.85	9716.91	56.38	72.87	0.388749
15JT06 28	344	334	332	375		12	3	3	5		334	3		153225	170.88	37.51	245612	<0.096	11.88	<0.053	0.71	1.32	0.209	7.47	3.28	44.12	18.56	88.11	20.73	212.96	39.8	10426.7	111.24	193.05	0.203478
15JT06 29	83	124	126	128		34	3	2	3		124	3		153225	259.62	4.42	250127	1.386	21.49	1.266	12.44	16.54	0.953	71.87	23.74	267.82	94.89	385.4	76.57	704.03	116.22	7571.9	185.14	243.02	0.0845027
15JT06 30	302	343	350	352		10	3	3	4		343	3		153225	710.5	4.68	247453	0.171	28.48	0.178	2.61	4.25	1.106	18.39	5.94	66.77	25.2	111.24	25	256.01	45.84	9607.12	278.78	395.24	0.382463
15JT06 31	275	344	354	376		10	3	3	5		344	3		153225	899.07	8.86	254077	<0.061	1.8	0.068	1.73	4.9	0.135	36.03	15.57	212.75	85.46	396.48	86.42	844.28	142.69	11819.6	135.36	498.2	0.0310615
15JT06 32	417	376	370	369		11	4	4	5		376	4		153225	272.81	3.48	247296	<0.096	18.28	<0.086	0.98	2.55	0.238	18.14	7.68	97.57	39.65	181.37	39.73	390.93	70.68	11241.9	286.4	389.9	0.106981
15JT06 33	183	91	87	91		25	2	1	1		91	2		153225	407.56	27.79	251692	<0.101	12.98	0.439	8.1	17.33	2.31	72.99	23.26	244.29	82.2	322.07	64.16	577.63	92.97	9514.4	547.92	451.61	0.198564
15JT06 34	160	127	125	122		116	8	3	6		127	8		153225	212.77	6.5	256472	<0.081	4.24	0.208	4.87	7.42	4.34	35.55	12.08	129.94	46.89	192.26	38.25	365.11	64.8	6446.44	45.25	61.07	0.816935
15JT06 35	329	352	355	372		10	2	3	4		352	2		153225	409.51	1.79	256665	<0.078	23.14	<0.060	0.68	3.05	<0.082	23.92	11.23	159.85	66.84	315.61	69.17	677.21	112.47	12918.7	291.57	1097.26	n.a.
15JT06 36	131	121	121	113		73	5	3	4		121	5		153225	272.51	7.14	256921	0.132	7.77	0.338	7.74	17.12	3.62	77.57	24.54	282.89	98.19	400.27	79.82	748.08	127.92	6682.1	177.93	198.46	0.303689
15JT06 37	338	333	333	336		10	2	3	3		333	2		153225	410.86	11.67	250269	<0.073	27.67	0.189	4.14	8.7	0.679	48.01	17.71	221.12	82.13	363.66	77.79	756.99	129.6	9958.04	534.88	765.66	0.10157
15JT06 38	66	89	90	90		22	1	1	1		89	1		153225	172.72	12.67	249859	<0.085	12.69	0.267	4.47	7.31	0.791	28.49	9.22	98.72	35.15	149.82	31.21	295.9	52.76	9856.51	391.81	532.6	0.167568
15JT06 39	142	90	88	91		31	2	1	2		90	2		153225	184.69	7.66	248788	<0.077	15.07	<0.062	0.79	3.51	0.343	19.87	7.79	97.47	37.81	168.28	37.53	369.25	66.02	12689.8	265.17	340.53	0.125563
15JT06 40	385	141	127	121		73	7	3	6		141	7		153225	220.65	9.55	256479	0.126	4.15	<0.058	1.53	2.89	1.43	15.86	5.45	59.19	22.53	91.77	21.02	217.62	36.44	6744.08	33.73	74.92	0.645736
15JT06 41	183	123	120	130		54	4	2	3		123	4		153225	226.89	16.68	252625	<0.104	18.99	0.248	3.97	5.77	0.95	23.95	7.69	86.15	32.31	135.7	30.71	308.69	53.91	9136.04	231.16	174.74	0.24706
15JT06 42	347	363	366	359		10	3	4	6		363	3		153225	156.52	2.12	244753	<0.072	9.39	<0.061	0.58	1.05	0.191	6.72	2.98	38.76	16.37	86.13	22.11	249.07	44.03	11208.3	90.38	334.4	0.219823
15JT06 43	343	355	357	369		13	4	4	7		355	4		153225	767.32	11.31	247963	<0.085	1.286	<0.085	1.08	3.37	0.135	24.05	10.28	138.5	56.94	259.79	57.68	570.94	96.42	11915.7	61.27	215.48	0.0458438
15JT06 44	175	93	90	82		109	6	2	4		93	6		153225	121.07	8.59	246911	<0.076	4.31	0.13	1.39	2.12	0.683	9.82	3.07	37.17	14.34	66.68	15.3	164.93	32.8	8347.25	59.09	83.47	0.457632
15JT06 45	71	92	92	94		31	2	1	2		92	2		153225	298.35	10.34	247243	<0.082	10.54	0.246	3.37	8.08	0.893	39.58	13.8	156.66	54.8	222.57	45.8	422.12	69.89	10236.8	328.38	341.28	0.152661
15JT06 46	306	326	329	328		10	3	3	4		326	3		153225	276.86	5.39	247316	0.328	8.28	<0.081	1.6	3.04	0.235	19.53	8.26	109.77	43.33	192.78	41.41	401.55	68.6	10459.1	187.04	385.44	0.0932394
15JT06 47	94	93	93	93		95	5	2	3		93	5		153225	274.71	22.85	248028	<0.087	13.79	0.323	5.9	8.01	1.51	33.75	11.13	121.77	43.34	183.5	38.24	361.47	63.37	9167.8	119.98	101.09	0.280765
15JT06 48	302	349	356	381		23	6	4	5		349	6		153225	602.97	11.75	247597	0.822	12.02	0.546	3.73	3.73	0.363	16.05	5.42	64.28	24.85	114.07	25.69	258.26	45.87	9897.87	129.76	105.15	0.143428
15JT06 49	138	127	126	130		17	2	1	2		127	2		153225	273.43	4.74	243896	<0.095	40.79	0.36	7.45	13.39	0.698	71.05	23.95	273.02	97.33	391.98	76.37	697.74	115.6	7862.41	515.97	479.44	0.0691835
15JT06 50	112	125	126	126		79	4	1	1		125	4		153225	205.49	2.31	241132	0.091	23.08	0.485	8.86	17.25	0.98	80.52	28.68	320.63	110.63	437.9	90.78	844.92	122.85	7828.81	246.89	367.9	0.0803895
15JT06 51	81	52	51	54		110	3	1	2		52	3		153225	264.07	19.27	246297	0.12	13.18	0.473	7.66	9.78	1.18	44.29	13.94	149.93	53.27	211.17	42.43	388.98	62.51	9312.62	148.57	144.07	0.173332
15JT06 52	318	254	248	276		10	2	2	3		254	2		153225	435.19	125.54	235494	<0.073	6.5	0.105	1.36	3.44	<0.144	23.09	9.47	123.26	50	222.89	49.99	489.43	85.18	10427.2	253.02	537.2	n.a.
15JT06 53	96	90	89.9	97		14	1	1	1		90	1		153225	285.07	3.05	244638	<0.117	28.02	0.117	1.69	4.58	2.25	31.5	10.94	131.45	49.44	215.56	46.49	463.5	80.54	10246.6	491.65	864.7	0.572683
15JT06 54	313	322	323	324		65	7	3	3		322	7		153225	218.14	4.18	248011	0.089	13.67	0.059	0.77	1.82	0.214	10.91	4.44	62.53	25.78	121.56	28.87	306.54	55.79	10314.1	136.14	303.32	0.14682
15JT06 55	161	138	137	125		113	8	3	7		138	8		153225	162.07	7.47	252449	<0.079	4.47	<0.067	0.55	1.52	0.305	8.16	3.14	39.86	15.76	71.79	15.67	160.61	29.1	7643.64	24.67	56.38	0.26476
15JT06 56	229	99	94	90		56	4	2	2		99	4		153225	229.94	17.5	249313	<0.071	12.47	0.289	5.4	7.72	1.03	31.84	10.25	109.69	39.01	156.1	31.86	303.05	51.37	9988.41	164.5	159.57	0.200845
15JT06 57	69	83	84	106		149	7	2	5		83	7		153225	180.8	10.37	246374	<0.079	7.43	<0.042	0.82	2.51	0.303	15.15	5.16	62.81	23.73	101.53	22.04	220.22	36.86	9804.59	53.3	72.93	0.150217
15JT06 58	107	88	88	92		64	3	1	2		88	3		153225	218.46	16.44	251413	<0.081	11.96	0.204	3.5	6.63	1.02	29.61	9.83	112.17	40.14	170.29	36.34	344.64	58.63	10000.3	151.41	150.79	0.222558
15JT06 59	229	118	112	201		263	18	6	17		118	18		153225	239.96	21.34	249474	<0.085	2.89	<0.067	1.57	2.3	2.31	13.37	4.35	50.79	18.66	78.47	17.96	177.38	29.95	5833.15	15.49	25.81	1.27351
15JT06 60	316	330	332	332		11	3	3	5		330	3		153225	241.67	19.86	243926	<0.069	7.74	<0.057	0.58	2.2	0.151	13.32	5.53	73.09	29.48	132.38	29.14	283.02	49.45	10073.6	151.62	350.82	0.0852772
15JT06 61	299	316	318	319		48	5	3	3		316	5		153225	414.85	6.56	242066	0.126	2.58	0.075	0.67	1.88	0.122	16.97	7.02	93.25	35.17	156.05	33.77	342.95	58.03	11252.7	68.16	299.12	0.0660328
15JT06 62	369	371	372	442		17	5	4	8		371	5		153225	413.39	12.05	248230	<0.090	2.02	0.069	1.09	4.38	0.232	23.13	8.29	101.1	38.25	167.82	36.37	361.49	62.92	9870.26	62.28	155.12	0.0704665
15JT06 63	388	359	355	358		11	3	4	7		359	3		153225	670.61	6.15	248386	<0.060	2.22	<0.073	1.14	3.69	0.159	27.14	11.37	145.17	55.86	248.6	54.67	534.68	92.39	11793.2	57.51	279.42	0.0485734
15JT06 64	353	345	344	344		10	3	3	4		345	3		153225	493.47	8.2	242449	0.174	11.58	0.234	4.36	6.87	1.88	36.91	12.57	146.76	56.15	245.46	53.1	525.41	95.63	8757.1	228.63	184.03	0.360933
15JT06 65	n.a.	86	90	84		117	6	2	3		86	6		153225	166.95	8.19	249265	<0.069	8.62	0.058	0.91	2.12	0.417	13.89	4.89	58.81	22.14	96.18	21	212.75	36.6	10761.9	75.54	91.24	0.234929
15JT06 66	292	134	126	128		27	3	2	2		134	3		153225	438.52	4.19	239581	7.4	44.97	3.18	19.17	10.82	0.849	44.9	14.81	169	62.76	259.44	53.19	488.76	85.32	8418.84	215.31	296.53	0.117758
15JT06 67	153	96	94	98		110	6	2	5		96	6		153225	154.35	11.57	246948	<0.079	6.49	<0.054	0.47	1.41	0.309	8.56	3.1	38.7	14.8	69.84	15.61	161.33	29.52	9176.15	49.88	82.69	0.271914
15JT06 68	175	90	87	84		95	5	2	5		90	5		153225	158.32	8.22	250682	<0.061	10.18	0.052	0.5	1.13	0.268	7.81	2.97	42.91	16.86	78.4	19.21	207.91	35.57	10822.7	54.03	106.12	0.275797
15JT06 69	98	92	92	92		139	8	2	6		92	8		153225	181.93	12.74	247631	<0.092	8.71	<0.069	0.83	1.31	0.354	7.79	3.19	41.84	16.56	75.47	17.13	171.86	32.25	9783.92	55.3	77.85	0.33878
15JT06 70	130	90	88	94		48	3	1	3		90	3		153225	140.89	10.36	249270	<0.071	9.77	<0.076	0.4	1.85	0.141	9.41	3.46	44.26	17.99	85.09	19.68	199.66	36.4	11714.6	122.5	238.03	0.103314
15JT06 71	114	90	89	92		94	5	2	3		90	5		153225	265.32	16.11	247705	<0.075	10	<0.056	1.57	3.33	0.529	16.52	6.23	70.72	25.52	107.33	22.62	214.63	36.43	9496.48	74.88	86.59	0.218046
15JT06 72	166	134	133	133		76	6	3	6		134	6		153225	228	5.44	249709	1.19	9.24	0.583	3.98	4.37	0.82	21.74	7.84	92.06	34.45	144.88	30.25	281.97	52.1	7447.48	58.18	91.14	0.257195
15JT06 73	159	130	128	161		167	12	4	10		130	12		153225	203.37	13.01	259574	<0.077	3.31	0.066	1.03	2.36	1.14	11.88	4.27	51.24	18.9	83.85	18.17	178.66	31.95	6794.62	24.65	45.4	0.658203
15JT06 74	32	84	86	88		32	2	1	2		84	2		153225	155.13	5.77	252340	<0.098	7.55	0.108	0.55	1.76	0.384	9.71	3.57	43.88	17.05	81.53	19.34	205.11	39.01	12869	171.44	354.43	0.283978
15JT06 75	n.a.	118	125	125		36	3	2	3		118	3		153225	194.32	2.4	252763	0.58	15.76	0.587	9.55	13.06	0.652	57.65	19.92	230.59	84.03	344.73	68.93	627.07	105.89	8016.45	155.36	208.9	0.0726433
15JT06 76	100	120	121	121		69	3	1	1		120	3		153225	321.13	9.88	253705	<0.094	20.65	0.234	6.06	13.83	0.357	73.3	27.05	327.15	118.81	496.16	99.08	912.95	148.81	9357.82	465.46	745.98	0.0342787
15JT06 77	188	54	51	55		152	5	1	3		54	5		153225	298.8	11.11	254204	0.226	10.7	0.235	3.07	5.36	0.95	23.28	7.82	91.59	33.48	144.62	31.75	309.66	55.4	9501.98	83.83	98.49	0.259998
15JT06 78	113	124	125	122		14	2	1	1		124	2		153225	286.43	5.25	248246	<0.091	45.6	0.206	4.34	10.7	0.364	68.22	24.48	289.27	104.68	426.46	84.89	781.22	124.59	8860.48	600.65	663.83	0.0411882
15JT06 79	420	365	357	359		10	3	3	3		365	3		153225	661.02	3.65	249693	4.82	44.73	1.83	9.37	7.12	0.8	26.84	10.13	126.41	50.55	233.04	53.21	534	99.76	10460.8	499.75	563.28	0.176921
15JT06 80	393	373	370	367		13	4	4	6		373	4		153225	367.13	9.56	253076	<0.088	2.12	0.088	1.12	3.1	0.167	18.91	6.97	88.93	34.37	157.37	34.51	342.44	59.03	10412.1	68.4	181.73	0.0666821
15JT06 81	298	342	349	344		10	3	3	5		342	3		153225	395.09	2.94	257716	0.08	5.8	<0.047	0.61	2.49	<0.079	15.33	7.72	105.59	44.53	210.08	49.55	501.14	87.34	12507.9	153.02	602.84	n.a.
15JT06 82	345	341	341	342		12	4	4	6		341	4		153225	463.83	4.98	253316	<0.076	2.71	<0.060	1	3.61	<0.114	21.49	8.59	115.26	45.82	211.58	47.27	459	77.07	11801.3	108.65	310.82	n.a.
15JT06 83	211	124	120	117		43	4	2	3		124	4		153225	248.21	2.99	261145	0.204	13.65	0.4	5.98	9.09	0.83	48.45	16.78	206.27	72.73	302.11	60.84	584.61	99.95	7711.96	159.7	230.14	0.120912
15JT06 84	47	85	86.6	88		16	1	0.9	1		85	1		153225	193.08	3.38	254283	<0.094	24.86	0.124	1.44	3.37	1.25	16.05	5.74	70.95	28.21	130.73	30.19	317.83	59.41	9688.92	363.72	824.41	0.519609
15JT06 85	232	181	177	188		35	4	2	5		181	4		153225	216.73	6.55	254536	0.203	9.23	<0.062	0.53	1.11	0.348	4.14	1.82	24.45	10.77	57.15	16.32	205.98	43.13	11542	67.05	129.16	0.496292
15JT06 86	38	87	89	86		68	4	1	3		87	4		153225	114.26	14.77	258076	<0.121	4.73	<0.066	0.52	1.02	<0.170	7.88	3.12	37.84	15.17	68.89	15.35	155.22	27.66	11454.8	76.64	163.9	n.a.
15JT06 87	180	179	179	170		39	5	3	4		179	5		153225	240.13	5.6	254720	0.31	11.83	0.189	2.57	4.64	1.28	20.39	7.56	93.5	36.75	168.08	38.71	408.28	76.89	10311.3	109.03	127	0.402311
15JT06 88	302	327	331	334		10	3	3	4		327	3		153225	657.61	18.88	256536	0.063	6.23	0.226	4.41	9.37	0.288	56.62	20.51	256.35	95.91	420.38	92.71	910.12	155.07	11191.5	391.6	734.74	0.0382259
15JT06 89	158	90	87	88		53	3	1	2		90	3		153225	182.5	7.39	259153	<0.086	8.77	0.177	3.4	5.91	1.52	26	8.9	107.23	40.82	181.46	42.31	430.99	79.42	9019.98	164.17	179.71	0.374872
15JT06 90	35	85	87	75		132	6	2	4		85	6		153225	180.52	8.68	249168	<0.074	10.04	<0.063	1.09	2.71	0.742	13.65	5.13	59.92	21.72	98.03	22.4	228.46	41.52	9928.79	65.16	79.77	0.372969
15JT06 91	128	89	87	87		106	5	2	4		89	5		153225	177.05	12.26	259837	<0.085	7.26	0.066	1.24	3.04	0.497	14.35	4.89	61.36	23.56	104.95	24.26	247.12	43.04	9647.91	67.78	92.45	0.230045
15JT06 92	218	47	43.5	43		28	1	0.6	0.8		47	1		153225	155.59	3.88	259991	<0.100	33.76	<0.063	1.55	3.35	0.84	13.46	4.39	54.29	21.08	100.54	24.35	261.76	47.71	10443.4	626.89	789.7	0.382432
15JT06 93	10	88	90	95		55	3	1	4		88	3		153225	193.97	9.28	253362	<0.056	3.57	0.078	0.72	2.24	0.413	12.13	4.23	53.63	20.04	93.37	21.7	221.56	39.32	8689.93	63.6	145.01	0.242223
15JT06 94	237	97	91	93		49	3	1	3		97	3		153225	176.51	6.4	255595	<0.076	6.83	<0.061	0.59	1.88	0.685	8.58	3.4	42.89	17.33	84.64	20.83	235.22	47.13	9308.79	92.48	167.74	0.52142
15JT06 95	318	319	320	369		39	8	5	18		319	8		153225	568.66	9.61	264755	<0.066	1.13	<0.051	0.79	2.47	0.184	18.79	7.88	120.1	49.78	226.38	52.66	527.05	90.43	12070.7	45.22	206.16	0.0825706
15JT06 96	76	88	89	89		24	2	1	1		88	2		153225	181.94	34.32	252477	0.091	10.52	0.359	4.83	8.84	1.4	34.11	11.35	127.26	45.96	191.69	40.01	378.73	62.95	9650.73	380.93	481.06	0.246479
15JT06 97	50	84	86	83		80	4	2	3		84	4		153225	466.21	21.16	257018	2.5	16.23	1.03	6.25	5.71	0.502	25.38	8.21	97.42	36.55	156.34	33.87	336.75	57.55	9650.59	146.03	156.74	0.127485
15JT06 98	205	184	183	175		57	6	3	5		184	6		153225	134.81	5.29	256447	<0.099	6.86	<0.060	0.97	2.61	0.96	13.13	4.55	53.67	20.84	99.38	22.99	256.7	49.11	9477.43	61.69	78.22	0.501347
15JT06 99	219	173	170	205		74	8	4	11		173	8		153225	76.59	0.79	251772	<0.057	9.68	<0.052	<0.29	0.86	0.114	3.06	1.41	23.29	10.7	58.88	16.45	219.55	42.35	11650.4	75.76	173.5	0.21484
15JT06 100	384	349	344	376		12	3	4	7		349	3		153225	712.77	4.12	249423	<0.062	1.95	<0.045	0.5	2.88	0.088	20.32	9.95	144.94	61.92	288.06	66.22	668.89	109.22	12141.3	110.14	363.53	0.0351677

## Sheet: SA01 reference zircon
	Age (Ma)					1s error					Trace elements
	Pb207/Pb206	Pb206/U238	Pb207/U235	Pb208/Th232		Pb207/Pb206	Pb206/U238	Pb207/U235	Pb208/Th232		Si	P	Ca	Sc	Ti	Y	Zr	Nb	La	Ce	Pr	Nd	Sm	Eu	Gd	Tb	Dy	Ho	Er	Tm	Yb	Lu	Hf	Ta	Th	U	Eu/Eu*
A44	515.5	541.4	536.5	551.7		130.37	11.22	24.67	16.96		153225	123.73	<287.25	475.75	12.06	427.71	448033	2.31	<0.168	18.55	0.716	8.53	8.95	5.32	24.21	5.67	50.05	14.21	55.69	10.18	85.03	16.25	8441.5	0.86	142.42	104.33	1.1049
A88	580.1	528.4	538.1	546.5		134.53	12.87	25.59	19.35		153225	133.63	<269.42	476.05	10.59	432.72	456291	2.13	<0.187	18.57	0.73	8.68	9.03	5.41	25.05	5.81	50.94	14.17	57.59	10.48	88.97	16.6	8675.47	0.8	141.99	102.47	1.09969
B23	622.3	540.7	556.3	530.6		183.82	17.29	36.91	25.93		153225	110.44	<309.89	472.69	11.14	429.3	448961	2.06	<0.250	17.92	0.66	7.88	8.28	5.07	23.49	5.3	47.3	13.3	52.98	9.41	82.65	15.23	7906.74	0.7	132.08	95.34	1.1114
B57	724.1	526.2	564.4	506		133.8	11.84	27.29	18.12		153225	120.75	<297.64	455.61	11.29	423.62	446461	2.05	0.186	18.58	0.7	8.58	9.26	5.5	24.78	5.73	52.12	14.3	58.49	10.85	91	16.91	8756.09	0.83	146.89	103.95	1.11001
B94	608.8	534.3	549.7	516.1		173.81	14.3	34.75	22.49		153225	114.06	<351.08	465.83	11.28	431.54	448034	2.34	<0.243	18.51	0.69	7.64	8.68	5.24	23.96	5.59	50.32	14.45	56.8	10.34	86.91	16.17	8411.22	0.85	141.63	102.52	1.11083
C29	612.8	510.9	530.5	517		169.3	12.3	33.11	21.09		153225	110.44	<310.75	461.1	11.03	430.14	448450	2.18	<0.31	19.57	0.74	8.68	9.16	5.48	25.47	5.74	53.16	14.88	58.91	10.77	93.39	17.21	8828.59	0.82	149.13	110.35	1.09683
C63	622.4	513.5	534.3	517.7		137.24	10.28	26.72	16.14		153225	110.42	<325.04	459.81	11.05	429.4	449057	2.08	<0.259	18.71	0.78	8.42	8.95	5.48	25.14	5.68	53.56	14.43	58.55	10.89	90.07	17.33	8838.7	0.93	146.68	105.08	1.11688
C97	578.9	554	558.8	540.2		115.39	10.39	22.76	16.19		153225	108.91	<303.38	464.43	11.26	442.52	455433	2.05	<0.249	19.59	0.74	8.82	9.38	5.87	26.23	6.05	55.49	15.62	61.68	11.55	95.75	18.09	9322.56	0.97	150.93	107.41	1.14408
D66	495.3	537.5	529.8	488.9		143.19	11.33	26.96	16.58		153225	109.13	<256.12	458.42	11.75	417.19	446540	2.12	<0.223	17.39	0.66	7.66	7.98	5	22.1	5.33	46.85	13.23	50.97	9.41	80.02	15.28	7947.61	0.76	127.3	91.56	1.15104
E04	491.1	553.9	541.9	568.4		179.17	14.52	34.75	22.71		153225	107.22	<263.11	451.74	10.65	424.11	446719	2	<0.222	19.32	0.68	9	8.93	5.56	24.64	5.87	52.4	15.07	61.82	11.11	94.39	17.68	9196.08	0.82	151.97	110.31	1.1459
E38	497.2	545.6	536.2	527.9		123.51	9.94	23.33	14.71		153225	95.72	<294.97	462.2	11.56	440.28	452740	1.92	<0.175	19.76	0.7	8.86	9.89	5.78	26.1	6.03	55.58	15.47	62.59	11.57	98.44	18.11	9493.94	0.91	154.82	111.41	1.09984
E72	444.4	567.5	543.3	561.5		166.29	14.1	31.92	21.13		153225	100.79	<278.66	467.78	11.18	447.76	461402	1.88	<0.207	20.19	0.71	9.15	9.39	5.94	28.34	6.18	56.37	16.34	65.24	11.94	100.29	18.67	9715.58	0.91	158.7	113.41	1.1132
F10	580.5	541.9	549	546.6		118.1	10.01	23.04	15.49		153225	103.71	<275.59	460.19	11.06	432.07	443670	1.99	<0.235	19.2	0.72	8.05	9.29	5.4	24.08	5.83	51.9	14.36	57.73	10.51	92.29	16.92	8756.16	0.98	148.3	105	1.10377
F44	717.1	527.1	564	506.6		123.6	12.63	24.69	17.84		153225	100.54	<216.12	454.08	10.9	428.41	432991	2.08	<0.162	18.73	0.674	8.26	8.95	5.35	24.38	5.87	51.15	14.43	56.82	10.34	88.51	17.1	8688.79	0.77	146.62	102.75	1.10725
F46	605.3	538.2	550.9	531		117.32	10.43	22.91	15.31		153225	112.48	<252.14	433.97	9.92	404.02	418769	1.84	<0.220	17.62	0.689	7.93	8.23	5.1	22.88	5.57	50.25	14.41	57.25	10.52	89.38	16.8	8601.01	0.87	144.87	102.14	1.13622
F79	614.4	519.7	537.3	508.1		116.07	9.83	22.29	14.8		153225	114.63	<342.52	478.72	12.59	448.37	456773	2.08	<0.281	19.51	0.72	8.99	9.61	5.62	26.1	5.9	54.04	15.23	60.4	11.11	94.45	17.99	9281.25	0.92	154.87	111.42	1.08486
G14	616.8	538.4	553.3	538.6		164.64	15.81	32.58	23.23		153225	102.36	<352.74	465.64	11.32	443.69	455572	7.59	<0.262	19.05	0.71	9.26	9.16	5.53	24.91	5.77	53.1	15.28	60.71	11.14	94.93	17.72	9305.74	0.88	155.66	112.32	1.11921
G48	629.5	523.5	543.4	492.2		118.39	9.72	23.1	14.51		153225	97.36	<270.47	472.62	11.86	441.14	458254	1.98	<0.232	18.9	0.715	8.5	9.22	5.36	24.14	5.56	51.57	14.72	58.43	10.68	87.71	16.96	8666.63	0.71	146.27	104.46	1.09837
G82	605.9	542.5	554.6	546.1		115.87	10.52	22.71	15.32		153225	106.5	<277.86	459.54	11.05	437.56	457004	1.88	<0.193	19.6	0.76	9.09	9.22	5.52	26.05	6.09	54.01	15.45	61.24	11.12	95.59	17.64	9179.49	0.82	153.97	110.17	1.0889
H17	475.3	548.8	535.2	566.4		208.19	17.63	40.11	26.86		153225	95.31	<258.41	456.19	11.78	428.6	450473	1.89	<0.194	18.57	0.74	8.78	8.85	5.39	24.31	5.74	51.91	14.83	59.81	10.7	90.27	16.93	8840.94	0.85	147.62	105.51	1.12343
H51	586.8	522	534.5	544.8		155.31	13.09	29.98	20.85		153225	104.71	<267.71	456.52	10.85	433.45	460207	2.05	<0.209	20.1	0.75	8.45	9.23	5.71	26.78	5.94	53.68	15.45	61.73	11.01	94.92	17.5	9200.42	0.88	155.57	114.47	1.11032
H85	570.9	527.1	535.7	524.5		163.42	12.19	31.89	18.64		153225	100.76	<332.03	470.9	10.98	482.07	454043	16.13	<0.196	17.62	0.68	8.03	8.57	5.05	23.2	5.16	47.57	13.44	52.36	9.42	80.95	15.75	7905.4	0.64	129.4	93.67	1.0949
I30	286.7	523.6	481.9	551.1		216.63	17	37.53	26.35		153225	98.25	<260.89	453.08	11.4	603.45	449770	15.68	0.272	18.64	0.65	8.34	9.12	5.34	25.06	5.83	52.74	14.36	57.39	10.6	89.74	17.22	8458.73	0.9	144.29	106.77	1.07987
I67	534.6	503.1	507.4	470.6		233.1	19.59	43.7	28.69		153225	99.73	<282.35	465.69	11.85	434.88	450804	2.38	<0.269	19	0.77	8.7	8.99	5.46	24.64	5.7	51.36	14.76	58.79	10.9	92.34	17.7	8757.89	1.05	144.87	105.26	1.12153
J02	492.7	533.5	524.4	523.5		160.49	12.59	30.15	18.68		153225	93.49	<228.65	466.56	11.61	444.27	459039	1.99	<0.208	19.5	0.71	9.57	9.5	5.82	26.49	6.01	54.11	15.53	62.37	11.52	96.74	18.08	9302.44	0.9	153.73	109.51	1.1216
J39	587.8	530.4	539.7	530.4		153.93	12.16	30.09	18.23		153225	110.46	<284.77	463.17	11.63	436.21	451452	2	<0.246	18.78	0.7	8.52	9.03	5.47	25.53	5.99	52.92	14.91	59.54	10.76	94.64	17.37	8910.13	0.76	148.34	107.05	1.10138
J74	505.4	552.1	541.6	509.5		121.66	9.76	23.23	14.31		153225	96.98	<282.36	439.54	10.78	414.41	438592	1.92	<0.215	19.3	0.73	9.01	9.02	5.48	25.41	6.21	52.78	15.33	60.36	10.93	96.58	16.81	8889.74	0.97	145.66	106.12	1.10661
K06	591.8	519.7	531.6	512		136.87	11.88	26.08	17.63		153225	94	<317.19	467.04	11.08	433.33	456482	1.95	<0.221	19.68	0.81	9.25	9.3	5.7	26.2	6.11	53.25	15.06	60.84	11.23	94.87	16.98	8938	0.97	150.15	112.98	1.11635
K43	613.4	538.3	551.6	499.8		166.65	20.15	31.08	20.07		153225	91.09	<310.09	446.39	10.75	411.9	452332	5.49	<0.215	18.81	0.75	8.89	8.73	5.45	24.58	5.57	51.3	14.72	56.85	10.53	88.77	16.49	8392.92	0.83	146.15	106.85	1.13741
K87	427	543	520.1	509.6		209.21	24.17	36.84	23.61		153225	87.34	<270.22	453.58	10.54	413.17	447543	1.69	<0.236	18.38	0.65	8.77	8.97	5.25	24.18	5.7	50.42	14.36	56.58	10.32	88.98	15.9	8309.35	1	138.75	103.1	1.08982
L12	602.9	563	569.6	530		143	17.6	27.19	17.41		153225	91	<245.22	451.72	11.89	418.46	455270	1.8	<0.214	19.27	0.79	8.17	9.4	5.55	25.05	5.94	52.8	14.83	58.83	10.88	93.72	16.83	8722.48	1	146.19	108.5	1.10572
L46	503.3	525.3	520.1	515		147.17	15.89	25.86	15.9		153225	88.09	<230.27	455.9	11.43	422.29	454712	1.76	<0.187	19.28	0.66	8.97	9.25	5.44	25.65	5.83	52.02	14.95	58.12	10.64	92.41	16.56	8680.9	0.69	148.36	109.3	1.0797
L80	479.6	518.1	510	500.5		163.16	17.42	28.21	17.02		153225	98.89	<283.01	447.93	11.01	420.47	448925	1.85	<0.268	18.7	0.66	8.37	9.15	5.54	24.34	5.87	51.74	14.09	57.06	10.8	91.02	16.43	8396.85	0.88	144.71	107.2	1.1349
M31	607.2	522.7	537.8	520.8		118.45	11.01	22.55	15.52		153225	74.86	<268.23	420.34	10.74	392.43	453781	1.72	0.198	18.35	0.668	8.73	9.31	5.58	23.05	5.7	49.86	14.25	52.75	10.47	95.36	15.39	8061.44	0.86	144.08	107.46	1.16451
M68	464.5	532.8	519.5	500.2		114.78	9.47	20.84	13.53		153225	73.66	<254.04	436.78	10.1	401.07	454951	1.74	0.19	17.98	0.68	8.18	8.96	5.42	22.48	5.61	48.7	13.9	51.69	10.04	90.38	15.09	7596.08	0.71	132.74	98.68	1.16753
N03	498.5	530.8	524.2	511.9		112.09	9.42	20.61	13.83		153225	76.96	<221.97	444.88	10.05	419.14	470463	1.69	<0.165	18.3	0.669	8.91	9.28	5.57	23.38	6.01	51.1	14.51	53	10.75	95.67	16.02	7955.57	0.67	138.38	104.43	1.15605
N37	711.1	534.7	568.9	513.9		90.95	9.21	18.16	13.3		153225	73.53	<188.69	446.47	10.87	416.94	469908	1.64	<0.140	19.05	0.786	9.08	8.79	5.83	23.56	5.73	51.58	15.17	56.16	10.9	98.83	16.32	8256.77	0.71	142.9	105.32	1.23853
N71	492.5	537.2	528.4	542.3		131.91	11.62	24.45	17.27		153225	73.48	<232.07	430.07	10.51	391.44	452004	1.6	<0.193	17.62	0.641	8.04	8.91	5.39	21.86	5.41	47.74	13.64	50.74	9.95	91.08	14.61	7663.81	0.6	133.22	99.17	1.18071
O16	388.9	547.6	517.5	537.9		142.39	11.54	26.01	17.56		153225	68.08	<203.49	424.2	10.47	397.69	451623	1.59	<0.195	17.82	0.645	8.5	8.91	5.49	23.31	5.66	48.14	13.97	52.03	9.96	93.01	14.97	7778.04	0.66	138.08	102.56	1.16461
O40	411.4	528.4	505.5	501.6		125.99	10.95	22.4	15.63		153225	70.8	<212.45	434.36	10.17	399.01	455235	1.63	<0.171	18.28	0.711	8.48	9.24	5.56	22.68	5.83	49.84	14.41	52.92	10.33	94.15	15.6	7868.28	0.76	139.55	103.16	1.17419
O74	598.8	540.2	550.9	543.8		127.39	12.17	24.77	18.87		153225	88.69	<211.78	456.22	12.18	423.73	475080	12.55	<0.172	18.7	0.661	8.42	9.3	5.55	25.44	5.78	51.43	14.73	43.05	10.75	91.27	15.83	8408.14	0.76	138.15	103.36	1.10309
P09	440	541.1	521.6	541.3		116.83	9.49	21.34	14.73		153225	85.78	<255.57	448.68	10.9	416.18	467381	1.86	0.172	18.33	0.642	8.32	8.97	5.45	24.1	5.56	51.01	14.19	58.41	10.75	90.97	15.72	8207.3	0.83	138.11	102.07	1.13321
P43	570.3	524.8	532.8	517.7		123.05	9.97	23.45	15.45		153225	90.59	<248.52	451.32	11.77	420.13	480259	1.91	<0.232	18.49	0.674	8.69	8.85	5.43	24.84	5.76	52.49	14.56	97.12	10.71	92.76	15.62	8318.62	0.85	147.86	110.48	1.11962

## Sheet: Whole rock-zircon pairs
I-types					A-types					S-types					Archean TTG						Rejected I-types
References	Whole rock SiO2 (wt.%)	Whole rock [La/Yb]N	Zircon Eu/Eu*		References	Whole rock SiO2 (wt.%)	Whole rock [La/Yb]N	Zircon Eu/Eu*		References	SiO2	[La/Yb]N	Zircon Eu/Eu*		References	Whole rock SiO2 (wt.%)	Whole rock [La/Yb]N	Zircon Eu/Eu*			Ref.	Whole rock SiO2 (wt.%)	Whole rock [La/Yb]N	Zircon Eu/Eu*
This study	63.397	8.19684	0.280299		Li et al., 2014, Lithos	68.5	31	0.33149		Wu et al., 2016	68.1	23.4	0.165402		Zhou et al., 2018, PR	68.2	30.4	0.370502			Ren et al., 2018, Lithos data	55.54	15.2	0.287631
			0.299354					0.364521					0.24277					0.477549						0.595888
			0.360568					0.36151					0.275097					0.41724						0.599125
			0.275653					0.279973					0.333564					0.403341						0.635605
			0.307104					0.578991										0.250991						0.651614
								0.189617			67.8	23.4	0.325382					1.01269						0.590882
	63.286	6.69847	0.305124					0.409018					0.22006											0.692889
			0.164035					0.35427					0.246386			72.1	27.9	0.360782						0.655725
			0.262545					0.409775					0.443783					0.478531						0.565918
			0.245338					0.222009					0.232666					0.364417						0.578092
			0.191952					0.223928					0.427044					0.32249						0.668785
			0.283118					0.383129					0.323815					0.411562						0.683423
								0.284042										0.473061						0.610586
	65.786	9.77444	0.367332					0.530778			69.8	5.9	0.134933											0.811958
			0.327943					0.522604					0.141864		Dey et al., 2014, PR	63.85	16.3	0.434295						0.649379
			0.31896					0.230637					0.200163					0.317749						0.673188
			0.308463					0.435456					0.116459					0.340638						0.575073
			0.393932										0.196604					0.340145						0.624138
						73	19.2	0.368015					0.274051					0.439678						0.60188
	60.69	5.56417	0.282275					0.46867					0.157495					0.395081						0.63807
			0.310277					0.86518					0.12399					0.452832						0.610238
			0.311488					0.372974					0.277112											0.617085
			0.317666					0.635584					0.100792			68.16	13.5	0.336392
			0.278235					0.592649					0.131982					0.195395				62.9	121	0.70476
			0.258201					0.44849										0.398317						0.657381
			0.250608					0.412542		Gao et al., 2016, Lithos	72.3	14.3	0.0234792					0.51672						0.693502
			0.251031					0.526239					0.0810987					0.324898						0.696074
			0.35099					0.551488					0.160437					0.363052						0.659886
													0.144173					0.237792						0.685075
	68.742	12.5848	0.257257		Li et al., 2012, Lithos	65	14.8	0.481722					0.0942272					0.55308						0.691394
			0.404532					0.387814					0.1442					0.19214						0.693253
			0.248008					0.430231					0.192595											0.696852
			0.284704					0.29313					0.132152			66.42	26	0.467975						0.674443
			0.266053					0.321377					0.244315					0.57527						0.71741
			0.346834					0.399748					0.0809599					0.568699						0.698245
			0.266776					0.495233					0.120251					0.653381						0.697087
			0.403801					0.3225					0.187221					0.521837						0.708109
			0.249131										0.095329					0.432633						0.612537
			0.255444			71.4	6.66	0.362481					0.204021					0.435308						0.575684
								0.427606					0.216766					0.487799						0.592082
	66.249	24.515	0.438469					0.326553					0.0247237					0.274278						0.632975
			0.329432					0.411363					0.235224											0.698376
			0.532526					0.330636					0.183836		Dey et al., 2015, GSL	70.83	26.77	0.446379						0.612872
			0.520621					0.348417					0.20928					0.303943						0.670436
			0.553873					0.249249					0.100286					0.646143						0.617865
			0.424812					0.441056					0.28052					0.64586						0.671419
								0.324793					0.119338											0.647845
	64.179	39.8713	0.597448					0.400371							Santosh et al., 2018, PR	64.46	9.65	0.27						0.657886
			0.614694					0.406333			69.9	16.2	0.0676057					0.19						0.629763
			0.508105					0.207151					0.189522					0.27						0.662313
			0.511731										0.111847					0.4						0.64499
			0.469724			74.6	4.91	0.216955					0.130042					0.35						0.664195
			0.485753					0.143974					0.274613					0.27						0.636122
			0.351396					0.216405					0.145865											0.653281
			0.559149					0.15276					0.142824											0.678222
			0.454184					0.14281					0.105946											0.642837
			0.487631					0.206351					0.120694											0.691628
								0.18937					0.203672											0.653531
	65.121	42.5911	0.557962					0.157738					0.099029											0.646665
			0.595564					0.166754					0.16178											0.627348
			0.50149					0.139438					0.126427											0.68616
			0.459163					0.116501					0.232934											0.690326
			0.463895										0.101353											0.693743
			0.726099			73.7	6.5	0.147464					0.295996											0.671287
			0.568853					0.137446					0.232412											0.682844
			0.491024					0.177659					0.2449
			0.250497					0.152815					0.153472								Liu et al., 2018, Lithos	58.99	8.01	0.157077
								0.407882					0.224326											0.437454
	65.566	41.4983	0.46449					0.434967																0.684635
			0.553506					0.175707		Huang et al., 2015, JAES	70.16	19.34	0.0378514											0.512826
			0.538578					0.138899					0.0614135											0.134639
			0.561099										0.0820413											0.580445
			0.5083			62.7	14.47	0.495997					0.0224627											0.620103
			0.397889					0.404293					0.0914155											0.55234
			0.518518					0.421222					0.0949498											0.515211
			0.692109					0.389968					0.0208575											0.138863
			0.52936					0.439333					0.0786692											0.506572
								0.401411					0.116012											0.532398
	70.446	30.6331	0.578478					0.429647					0.145159
			0.666361					0.536888					0.171836
			0.683257					0.407581					0.0636147
			0.618887					0.379844					0.0540173
			0.655409					0.377604					0.0602332
			0.564129					0.380538
			0.609393					0.460679			72.62	5.28	0.0258998
			0.504128					0.536024					0.14305
								0.394296					0.175768
	71.312	29.1935	0.576596					0.409795					0.0585106
			0.685443					0.287542					0.0328871
			0.681658					0.332336					0.0432387
			0.636608					0.465935					0.145781
			0.652411					0.423214					0.0819834
			0.550298					0.356258					0.0956795
			0.720185					0.304564					0.0496442
			0.587285					0.442197					0.150274
								0.379523					0.0247903
	71.107	24.0336	0.513925					0.437588					0.0721749
			0.424121					0.448553					0.147627
			0.42833					0.434636
			0.532852					0.431385			73.15	5.45	0.0020575
			0.73174					0.384867					0.060997
			0.434175					0.383049					0.0234432
			0.392187					0.407826					0.0238244
			0.530576										0.0418941
						71.6	10.18	0.167161					0.112664
	68.196	48.4709	0.773685					0.0961903					0.0251332
			0.529852					0.321553					0.230809
			0.56415					0.130071					0.195076
			0.587989					0.288289					0.0530838
			0.683077					0.248238					0.0191363
			0.644718					0.331424					0.0590483
								0.390631					0.013534
Wang et al., 2015	65.58	58.86	0.585564					0.218574
			0.66505							Wang et al., 2012, JAES	74.02	3.5	0.0537088
			0.670088		Zhang et al., 2018, OGR	72.1	2.76	0.119427					0.0607361
			0.60821					0.130524					0.0611299
			0.643879					0.149454					0.032788
			0.673233					0.119379					0.0733624
			0.596794					0.111635					0.025
								0.126943
Wang et al., 2012, JAES	66.19	14.4	0.485418					0.133443			73.17	35.4	0.116835
			0.262874					0.117535					0.0365788
			0.509688										0.107921
			0.534648			72.9	7.86	0.147788					0.214884
			0.508254					0.137184					0.153648
			0.387813					0.117039					0.133595
			0.543841					0.11884					0.299753
			0.407678					0.13213					0.0716852
			0.576476					0.138578					0.114583
			0.583348										0.110459
			0.572954		Padilla et al., 2016, CMP	70.6	4.81715	0.241374					0.0837475
								0.40489					0.262419
	70.58	29	0.50302					0.158664					0.186277
			0.406475					0.321419
			0.477572					0.272336			69.85	36.5	0.173215
			0.490028					0.186675					0.146871
			0.471925					0.116881					0.197011
			0.456373					0.227591					0.158045
			0.4412					0.193219					0.122173
			0.390443					0.425909					0.121081
			0.434161					0.185034					0.128797
			0.450559					0.198857					0.142147
			0.435563					0.117589					0.13469
			0.426469					0.121179					0.165094
								0.242245					0.112234
	66.46	10.7	0.464614					0.137809					0.148154
			0.447659					0.265722					0.120259
			0.29015					0.256689					0.123652
			0.511427					0.291065					0.137826
			0.469257					0.18008
			0.402241					0.203787		Dou et al., 2019, Lithos	72.39	45.9	0.0748324
			0.384243					0.288752					0.14449
			0.35495					0.228377					0.117794
								0.220596					0.122378
	69.21	15.9	0.245845					0.269257					0.0992423
			0.345624					0.224249					0.115258
			0.181518					0.156666					0.0878176
			0.283988					0.244226					0.0720432
			0.295786					0.214183					0.0758249
			0.319633					0.229646					0.123874
			0.338333					0.215767					0.217212
								0.261009					0.100804
Guan et al., 2012, GR	71.03	45.4	0.695563					0.251839					0.103342
			0.742694					0.369162					0.198946
			0.67476					0.287189
			0.727068					0.273208			72.79	43.1	0.144412
			0.698975					0.146208					0.0656353
			0.659798										0.0908636
			0.626545			61.1	5.17281	0.28883					0.114782
			0.73268					0.166862					0.05337
			0.683712					0.152733					0.193003
			0.706571					0.303886					0.108144
			0.660487					0.0700603					0.127172
			0.66274					0.282243					0.244514
			0.722438					0.313019					0.121538
			0.785292					0.15221					0.159605
			0.695658					0.134957					0.0749591
			0.66436					0.29571					0.10507
			0.698264					0.18376					0.143917
			0.743637					0.187316					0.117834
								0.301261
	54.8	57.5	0.757759					0.235535			73.77	9.3	0.130965
			0.684923					0.19747					0.104735
			0.769083					0.315318					0.136636
			0.726334					0.301086					0.295748
			0.745582					0.196265					0.138724
			0.70672					0.252901					0.170068
			0.742958					0.361225
			0.80125					0.31308			74.25	11.5	0.0239431
			0.66869					0.326972					0.0702803
			0.627786					0.293171					0.0617837
			0.646107					0.300057					0.042962
			0.762845					0.303494					0.0354737
			0.731238					0.0899745					0.069327
			0.74305										0.0892392
			0.706169			64.9	4.72973	0.370718					0.0476503
			0.787308					0.0656494					0.0138789
			0.72254					0.0871754
			0.622798					0.0955884
								0.35599
Zhu et al., 2012, CG	72.54	7.37	0.255769					0.0873701
			0.108801					0.335442
			0.11746					0.296077
			0.260941					0.351056
			0.136668					0.089981
			0.0796957					0.0941308
			0.152701					0.0900047
			0.153589					0.373294
			0.0968037					0.0689725
			0.319147					0.107895
								0.0989305
	66.23	7.95	0.100343					0.0955333
			0.129523					0.365006
			0.0991246					0.373376
			0.144897					0.102018
			0.166213					0.336237
			0.141059					0.0906901
			0.16913					0.0841594
			0.0931021					0.08294
			0.149377					0.316971
			0.181964					0.368861
	74.1	5.22	0.187654
			0.193372
			0.174191
			0.522303
			0.069287
			0.181762
			0.146363
			0.148771
			0.204521
			0.158983
			0.141832
			0.141629
			0.1458
			0.187444
			0.21092
			0.17255
			0.136647
			0.125213
			0.184973
			0.24685
			0.158937
			0.155872
			0.161594
			0.136161
			0.185008
Liu et al., 2019, Lithos	68.1	15.44	0.205805
			0.135292
			0.161727
			0.261711
			0.367342
			0.307064
			0.148725
	65.2	8.61	0.140732
			0.158697
			0.118452
			0.105306
			0.118407
			0.114052
			0.125601
			0.14074
			0.116022
			0.132574
			0.10321
			0.13839
			0.105369
	58.4	7.1	0.13305
			0.130063
			0.148786
			0.152844
			0.135512
			0.14485
			0.172629
			0.162789
			0.166299
			0.163289
			0.159614
			0.136498
			0.177523
			0.157303
			0.226407
			0.162639
			0.168466
			0.153653
			0.159574
			0.150977
			0.157119
	55.6	4.98	0.180854
			0.142962
			0.151886
			0.154838
			0.172334
			0.152859
			0.148214
			0.191037
			0.139295
			0.0945555
			0.177761
			0.154608
			0.193141
			0.13646
			0.183308
			0.152984
			0.147033
			0.150841
			0.191899
			0.176813
			0.173237
	60.9	7.08	0.132781
			0.158668
			0.155825
			0.149771
			0.159678
			0.151206
			0.142592
			0.12982
			0.150585
			0.142365
			0.0793282
			0.0567154
			0.0746679
			0.0541509
			0.0333387
			0.0759414
			0.151988
			0.165373
Angerer et al., 2018, CMP	56.2	5.5	0.18746
			0.175133
			0.184248
			0.175029
			0.14405
			0.17611
			0.178247
			0.193652
	68.6	8.32	0.225617
			0.208263
			0.192906
			0.160029
			0.411372
			0.246376
			0.197881
	71.2	7.05	0.189329
			0.130122
			0.139393
			0.198543
			0.15708
			0.15071
			0.153064
			0.158211
			0.159912
	70.1	11.52	0.399362
			0.17783
			0.407757
			0.247781
			0.313761
			0.283449
Wang et al., 2013, Lithos	58.9	23.6	0.37
			0.4
			0.37
			0.39
			0.38
			0.42
			0.38
			0.37
			0.4
			0.35
			0.4
			0.41
			0.37
			0.39
			0.41
			0.43
	60.4	19.6	0.36
			0.38
			0.35
			0.43
			0.39
			0.37
			0.37
			0.38
			0.33
			0.35
			0.4
			0.31
	56.2	26.7	0.56
			0.61
			0.57
			0.6
			0.57
			0.57
			0.59
			0.54
			0.59
			0.6
			0.57
	64.9	33.2	0.45
			0.26
			0.84
			0.56
			0.53
			0.52
			0.74
			0.82
			0.51
			0.59
			0.57
			0.65
			0.6
			0.71
Fu et al., 2012, Lithos	68.66	24.5	0.636006
			0.523222
			0.577831
			0.361428
			0.728009
			0.601293
			0.594253
			0.578245
			0.531539
			0.442279
			0.747725
			0.541383
			0.53221
			0.527405
			0.709015
Li et al., 2012, MP; Jiang et al., 2006, EPSL	67.2	38.7	0.724293
			0.731957
			0.743223
			0.6138
			0.636295
			0.575666
			0.749326
			0.683253
			0.733735
			0.600975
			0.688584
			0.736738
			0.624641
			0.574323
			0.730531
			0.580658
			0.649862
			0.669883
			0.599533
			0.664809
			0.72076
			0.570585
			0.639699
			0.716707
			0.686636
			0.601527
			0.68105
			0.818622
			0.659137
			0.500083
			0.561475
			0.679714
			0.6808
			0.607648
			0.613018
			0.615785
			0.677513
			0.701219
			0.598949
			0.671866
			0.684073
			0.568481
			0.630203
			0.799836
			0.594458
			0.427601
			0.580295
			0.561585
			0.643159
			0.585842
			0.491677
			0.66508
			0.696493
			0.656891
			0.593883
			0.574045
			0.587237
			0.594287
			0.662958
			0.684843
			0.575839
			0.538342
			0.587345
			0.612243
			0.616183
			0.437226
			0.576754
			0.719687
			0.604571
			0.551095
			0.860617
			0.638619
			0.592013
			0.628606
			0.618384
			0.640486
			0.649013
			0.287338
			0.587719
			0.62194
			0.574441
			0.628805
			0.556943
			0.526965
			0.628106
			0.608242
			0.808863
			0.69856
			0.594188
			0.789123
Ballard et al., 2002, CMP	62.71	9.18	0.13
			0.13
			0.09
			0.11
			0.11
			0.09
			0.05
			0.09
			0.11
	70.92	9.63	0.24
			0.26
			0.19
			0.24
			0.22
			0.21
			0.24
			0.18
			0.23
			0.18
	64.11	10.34	0.23
			0.25
			0.23
			0.27
			0.25
			0.23
			0.21
			0.27
	58.16	9.88	0.28
			0.25
			0.38
			0.37
			0.4
			0.4
			0.32
			0.4
			0.35
			0.42
	71.96	8.97	0.34
			0.26
			0.24
			0.27
			0.29
			0.3
			0.32
			0.27
			0.25
			0.28
	67.45	9.67	0.16
			0.26
			0.35
			0.33
			0.31
			0.18
			0.39
			0.35
			0.33
			0.33
	64.8	15.24	0.44
			0.44
			0.43
			0.36
			0.36
			0.46
			0.31
			0.23
			0.48
	66.64	14.84	0.44
			0.44
			0.43
			0.36
			0.36
			0.46
			0.31
			0.23
			0.48
	62.11	8.71	0.1
			0.12
			0.15
			0.12
			0.12
			0.11
			0.11
			0.11
			0.1
	65.28	11.1	0.19
			0.39
			0.28
			0.25
			0.18
			0.23
			0.32
			0.22
			0.29
			0.37
	66.49	14.03	0.72
			0.52
			0.26
			0.21
			0.35
			0.44
			0.5
			0.24
			0.38
			0.22
	75.83	11.56	0.3
			0.41
			0.33
			0.54
			0.47
			0.25
			0.35
			0.24
			0.32
			0.32
	68.27	18.68	0.25
			0.31
			0.37
			0.25
			0.26
			0.19
			0.3
			0.72
			0.45
	67.96	25.97	0.46
			0.53
			0.53
			0.77
			0.63
			0.4
			0.36
			0.7
			0.5
			0.42
	71.46	24	0.46
			0.74
			0.48
			0.57
			0.56
			0.44
			0.56
			0.38
			0.29
			0.95
	69.8	20.12	0.44
			0.44
			0.44
			0.37
			0.52
			0.51
			0.47
			0.41
			0.54
			0.43
	70.77	21.84	0.45
			0.47
			0.51
			0.49
			0.54
			0.47
			0.54
			0.5
			0.4
			0.44
	70.86	22.68	0.47
			0.49
			0.63
			0.48
			0.53
			0.46
			0.57
			0.57
			0.42
			0.42
	63.52	7.48	0.21
			0.2
			0.21
			0.17
			0.21
			0.2
			0.19
			0.18
			0.19
			0.21
	n.a.	20.06	0.4
			0.3
			0.3
			0.54
			0.17
			0.42
			0.36
			0.53
			0.36
			0.49
			0.43
			0.36
			0.42
			0.29
			0.46
			0.38
			0.48
			0.52
			0.5
			0.54
	n.a.	19.72	0.63
			0.61
			0.44
			0.35
			0.42
			0.47
			0.49
Zhao et al., 2016, CG	63.1155	9.43676	0.246338
			0.245478
			0.302377
			0.220569
	64.1641	10.32	0.300832
			0.133945
			0.282261
	68.5542	10.66	0.208531
			0.245688
			0.246294
			0.0682805
			0.158038
			0.214624
			0.32518
Zhang et al., 2018, GR	58.63	4.95	0.19
			0.17
			0.18
			0.11
			0.15
			0.22
			0.26
			0.28
			0.15
			0.23
			0.18
			0.18
			0.19
			0.25
			0.14
			0.25
			0.23
			0.2
			0.27
			0.25
			0.18
			0.18
			0.28
			0.31
			0.21
			0.31
			0.14
			0.18
			0.06
			0.08
			0.05
			0.05
			0.09
			0.05
			0.04
			0.1
			0.07
			0.06
			0.05
			0.03
			0.06
			0.08
			0.08
			0.06
			0.04
			0.05
			0.06
			0.14
			0.07
			0.05
			0.11
			0.07
	72.27	4.92	0.05
			0.1
			0.08
			0.05
			0.07
			0.06
			0.08
			0.07
			0.03
			0.09
			0.04
			0.01
			0.08
			0.05
			0.04
			0.06
			0.12
			0.11
			0.04
			0.1
			0.09
			0.13
			0.09
			0.07
			0.04
			0.19
	67.38	8.74	0.12
			0.09
			0.06
			0.1
			0.05
			0.34
			0.09
			0.02
			0.02
			0.02
			0.76
			0.29
			0.16
			0.04
Lan et al., 2019, GR	57.1	11.5	0.339541
			0.307738
			0.335514
			0.325348
			0.339467
			0.336374
			0.395713
			0.362178
			0.359659
			0.334794
			0.32825
			0.305045
			0.309369
			0.375145
			0.28892
			0.365986
			0.379501
			0.291745
			0.322238
			0.314236
			0.337476
	64.4	23.6	0.465016
			0.51671
			0.460251
			0.48381
			0.494997
			0.512483
			0.48972
			0.535022
			0.497171
			0.496473
			0.424277
			0.47946
			0.507019
			0.49225
			0.509749
			0.433929
	58.3	11.8	0.422871
			0.353836
			0.390206
			0.391292
			0.39203
			0.444584
			0.3973
			0.406984
			0.432081
			0.135059
			0.393031
			0.384616
			0.386519
			0.39911
			0.411215
			0.394427
			0.349441
			0.390394
Xu et al., 2019, Lithos	67.16	45.4	0.58
			0.59
			0.52
			0.64
			0.57
			0.63
			0.57
			0.56
			0.64
			0.55
			0.53
			0.61
			0.76
			0.57
			0.54
			0.66
			0.63
			0.67
			0.58
			0.64
			0.58
	67.73	31.3	0.8
			0.72
			0.58
			0.84
			0.8
			0.63
			0.66
			0.54
			0.59
			0.75
			0.78
			0.71
			0.64
			0.65
			0.68
			0.61
			0.7
			0.64
			0.66
			0.79
			0.81
			0.57
Wu et al., 2018, G cubed	61	44.1	0.621451
			0.553421
			0.647169
			0.64052
			0.678631
			0.631815
			0.611781
			0.676284
			0.615872
			0.612157
			0.58957
			0.596764
			0.664036
			0.687094
			0.639027
			0.686287
			0.654368
			0.668061
			0.681903
			0.688331
			0.56366
			0.678204
			0.681599
	62.4	39.9	0.593899
			0.616551
			0.650786
			0.603888
			0.624333
			0.646023
			0.704763
			0.631909
			0.596601
			0.591073
			0.692323
			0.64214
			0.702342
			0.559691
			0.572804
			0.610763
			0.715782
			0.634958
			0.632587
			0.699784
			0.714457
			0.687025
			0.686719
			0.668147
Ren et al., 2018, Lithos	61.72	16.5	0.367437
			0.309089
			0.305758
			0.327638
			0.343693
			0.322786
			0.360548
			0.373993
			0.323862
			0.325455
			0.366848
			0.340501
			0.271363
			0.38032
			0.373614
			0.324204
			0.34016
			0.389766
			0.303771
			0.350285
			0.370104
			0.352713
			0.348857
	60.96	15.9	0.412449
			0.402484
			0.404261
			0.383049
			0.369442
			0.390686
			0.405318
			0.384882
			0.396298
			0.392054
			0.413832
			0.379915
			0.445001
			0.394457
			0.387863
			0.402105
			0.425354
			0.437484
			0.414313
			0.399541
			0.402314
			0.422859
			0.392005
			0.380772
Stelten and Cooper, 2012, EPSL	72.84	7.92	0.263141
			0.387118
			0.400874
			0.199162
			0.511657
			0.280542
			0.431784
			0.26827
			0.259084
			0.322115
			0.344684
			0.298377
			0.446797
			0.330079
			0.3114
			0.199886
	72.79	8.07	0.232579
			0.161772
			0.28783
			0.286799
			0.289985
			0.537452
			0.270633
			0.249462
			0.355736
			0.289387
			0.309653
	73.76	8.18	0.25418
			0.385697
			0.264089
			0.399684
			0.424044
			0.160354
			0.235866
			0.298078
			0.317643
			0.29366
			0.362232
			0.373524
			0.261799
			0.269816
			0.295801
			0.205649
			0.32017
			0.245552
			0.189674
Li et al., 2013, Acta P S		8.37	0.26
			0.29
			0.25
			0.19
			0.26
			0.3
			0.26
			0.23
			0.31
			0.3
			0.29
			0.31
			0.28
			0.24
			0.29
			0.34
			0.3
			0.31
		8.92	0.3
			0.36
			0.23
			0.21
			0.29
			0.26
			0.27
			0.26
			0.26
			0.26
			0.23
			0.26
			0.25
			0.29
			0.29
			0.29
			0.26
			0.23
Ma et al., 2019, Geosphere	58.5	7.07	0.252817
			0.257947
			0.221684
			0.270224
			0.26678
			0.241504
			0.236959
			0.225107
			0.244163
			0.197687
			0.257905
			0.23674
			0.251852
			0.218188
			0.239268
			0.205642
			0.239181
			0.250627
			0.209214
			0.258464
	57.5	7.15	0.273353
			0.246695
			0.224176
			0.292096
			0.248073
			0.244721
			0.292135
			0.278378
			0.270767
			0.222422
			0.289753
			0.265317
			0.152002
			0.273764
			0.295536
			0.306414
			0.286375
			0.272603
			0.274548
			0.268199
	58.8	7.25	0.278965
			0.267028
			0.275943
			0.306524
			0.281392
			0.238941
			0.666801
			0.298467
			0.265112
			0.258819
			0.231279
			0.253098
			0.295032
			0.253944
			0.278083
			0.358487
			0.268052
			0.269735
			0.314085
			0.240978
Wu et al., 2016. PR	73.7	3.17	0.159336
			0.136839
			0.409231
			0.134709
			0.0968983
			0.126679
			0.114668
			0.150767
			0.267438
			0.123698
			0.233251
			0.134821
			0.136135
			0.186279
	70	25.04	0.407444
			0.348699
			0.416054
			0.50488
			0.353623
			0.295294
			0.383904
			0.283374
			0.388407
			0.485834
			0.682379
			0.220222
			0.345426
			0.569792
			0.809493
			0.716259
References
Angerer, T., Kemp, A.I., Hagemann, S.G., Witt, W.K., Santos, J.O., Schindler, C., Villanes, C., 2018. Source component mixing controls the variability in Cu and Au endowment along the strike of the Eastern Andean Cordillera in Peru. Contributions to Mineralogy and Petrology 173, 36.
Ballard, J.R., Palin, M.J., Campbell, I.H., 2002. Relative oxidation states of magmas inferred from Ce (IV)/Ce (III) in zircon: application to porphyry copper deposits of northern Chile. Contributions to Mineralogy and Petrology 144, 347-364.
Dey, S., Nandy, J., Choudhary, A., Liu, Y., Zong, K., 2014. Origin and evolution of granitoids associated with the Kadiri greenstone belt, eastern Dharwar craton: a history of orogenic to anorogenic magmatism. Precambrian Research 246, 64-90.
Dey, S., Nandy, J., Choudhary, A., Liu, Y., Zong, K., 2015. Neoarchaean crustal growth by combined arc–plume action: evidence from the Kadiri Greenstone Belt, eastern Dharwar craton, India. Geological Society, London, Special Publications 389, 135-163.
Dou, J., Siebel, W., He, J., Chen, F., 2019. Different melting conditions and petrogenesis of peraluminous granites in western Qinling, China, and tectonic implications. Lithos 336, 97-111.
Fu, L., Wei, J., Kusky, T.M., Chen, H., Tan, J., Li, Y., Shi, W., Chen, C., Zhao, S., 2012. The Cretaceous Duimiangou adakite-like intrusion from the Chifeng region, northern North China Craton: crustal contamination of basaltic magma in an intracontinental extensional environment. Lithos 134, 273-288.
Gao, P., Zheng, Y.-F., Zhao, Z.-F., 2016. Distinction between S-type and peraluminous I-type granites: Zircon versus whole-rock geochemistry. Lithos 258, 77-91.
Guan, Q., Zhu, D.-C., Zhao, Z.-D., Dong, G.-C., Zhang, L.-L., Li, X.-W., Liu, M., Mo, X.-X., Liu, Y.-S., Yuan, H.-L., 2012. Crustal thickening prior to 38 Ma in southern Tibet: evidence from lower crust-derived adakitic magmatism in the Gangdese Batholith. Gondwana Research 21, 88-99.
Huang, B.-T., He, Z.-Y., Zhang, Z.-M., Klemd, R., Zong, K.-Q., Zhao, Z.-D., 2015. Early Neoproterozoic granitic gneisses in the Chinese Eastern Tianshan: petrogenesis and tectonic implications. Journal of Asian Earth Sciences 113, 339-352.
Jiang, Y.-H., Jiang, S.-Y., Ling, H.-F., Dai, B.-Z., 2006. Low-degree melting of a metasomatized lithospheric mantle for the origin of Cenozoic Yulong monzogranite-porphyry, east Tibet: geochemical and Sr–Nd–Pb–Hf isotopic constraints. Earth and Planetary Science Letters 241, 617-633.
Lan, T.-G., Hu, R.-Z., Chen, Y.-H., Wang, H., Tang, Y.-W., Liu, L., 2019. Generation of high-Mg diorites and associated iron mineralization within an intracontinental setting: Insights from ore-barren and ore-bearing intrusions in the eastern North China Craton. Gondwana Research 72, 97-119.
Li, G.J., Wang, Q.F., Yu, L., Hu, Z.C., Ma, N., Huang, Y.H., 2013. Closure time of the Ailaoshan Paleo Tethys Ocean: Constraints from the zircon U-Pb dating and geochemistry of the Late Permian granitoids. Acta Petrologica Sinica, 29(1): 383-390
Li, H., Ling, M.-x., Ding, X., Zhang, H., Li, C.-y., Liu, D.-y., Sun, W.-d., 2014. The geochemical characteristics of Haiyang A-type granite complex in Shandong, eastern China. Lithos 200, 142-156.
Li, H., Ling, M.-x., Li, C.-y., Zhang, H., Ding, X., Yang, X.-y., Fan, W.-m., Li, Y.-l., Sun, W.-d., 2012a. A-type granite belts of two chemical subgroups in central eastern China: Indication of ridge subduction. Lithos 150, 26-36.
Li, J., Qin, K., Li, G., Cao, M., Xiao, B., Chen, L., Zhao, J., Evans, N.J., McInnes, B.I., 2012b. Petrogenesis and thermal history of the Yulong porphyry copper deposit, Eastern Tibet: insights from U-Pb and U-Th/He dating, and zircon Hf isotope and trace element analysis. Mineralogy and Petrology 105, 201-221.
Liu, D.-L., Shi, R.-D., Ding, L., Zou, H.-B., 2018. Late Cretaceous transition from subduction to collision along the Bangong-Nujiang Tethys: New volcanic constraints from central Tibet. Lithos 296, 452-470.
Liu, Y., Xiao, W., Windley, B.F., Li, R., Ji, W., Zhou, K., Sang, M., Chen, Y., Jia, X., Li, L., 2019. Late Triassic ridge subduction of Paleotethys: Insights from high-Mg granitoids in the Songpan-Ganzi area of northern Tibet. Lithos 334, 254-272.
Ma, X., Xu, Z., Zhao, Z. and Yi, Z., 2020. Identification of a new source for the Triassic Langjiexue Group: Evidence from a gabbro-diorite complex in the Gangdese magmatic belt and zircon microstructures from sandstones in the Tethyan Himalaya, southern Tibet. Geosphere, 16(1), pp.407-434.
Ren, L., Liang, H., Bao, Z., Zhang, J., Li, K., Huang, W., 2018. The petrogenesis of early Paleozoic high-Ba–Sr intrusions in the North Qinling terrane, China, and tectonic implications. Lithos 314, 534-550.
Santosh, M., Li, S.-S., 2018. Anorthosites from an Archean continental arc in the Dharwar Craton, southern India: implications for terrane assembly and cratonization. Precambrian Research 308, 126-147.
Stelten, M.E. and Cooper, K.M., 2012. Constraints on the nature of the subvolcanic reservoir at South Sister volcano, Oregon from U-series dating combined with sub-crystal trace-element analysis of plagioclase and zircon. Earth and Planetary Science Letters, 313, pp.1-11.
Wang, F., Liu, S.-A., Li, S., He, Y., 2013. Contrasting zircon Hf–O isotopes and trace elements between ore-bearing and ore-barren adakitic rocks in central-eastern China: implications for genetic relation to Cu–Au mineralization. Lithos 156, 97-111.
Wang, Q., Zhu, D.-C., Zhao, Z.-D., Guan, Q., Zhang, X.-Q., Sui, Q.-L., Hu, Z.-C., Mo, X.-X., 2012. Magmatic zircons from I-, S-and A-type granitoids in Tibet: Trace element characteristics and their application to detrital zircon provenance study. Journal of Asian Earth Sciences 53, 59-66.
Wu, K., Ling, M.X., Hu, Y.B., Guo, J., Jiang, X.Y., Sun, S.J., Liang, H.Y., Liu, X., Sun, W., 2018. Melt‐fluxed melting of the heterogeneously mixed lower arc crust: A case study from the qinling orogenic belt, Central China. Geochemistry, Geophysics, Geosystems 19, 1767-1788.
Wu, T., Polat, A., Frei, R., Fryer, B.J., Yang, K.G. and Kusky, T., 2016. Geochemistry, Nd, Pb and Sr isotope systematics, and U–Pb zircon ages of the Neoarchean Bad Vermilion Lake greenstone belt and spatially associated granitic rocks, western Superior Province, Canada. Precambrian Research, 282, pp.21-51.
Wu, Q., Cao, J., Kong, H., Shao, Y., Li, H., Xi, X., Deng, X., 2016. Petrogenesis and tectonic setting of the early Mesozoic Xitian granitic pluton in the middle Qin-Hang Belt, South China: Constraints from zircon U–Pb ages and bulk-rock trace element and Sr–Nd–Pb isotopic compositions. Journal of Asian Earth Sciences 128, 130-148.
Xu, L.-L., Bi, X.-W., Hu, R.-Z., Tang, Y.-Y., Wang, X.-S., Huang, M.-L., Wang, Y.-J., Ma, R., Liu, G., 2019. Contrasting whole-rock and mineral compositions of ore-bearing (Tongchang) and ore-barren (Shilicun) granitic plutons in SW China: Implications for petrogenesis and ore genesis. Lithos 336, 54-66.
Zhang, H., Chen, J., Yang, T., Hou, Z., Aghazadeh, M., 2018a. Jurassic granitoids in the northwestern Sanandaj–Sirjan Zone: Evolving magmatism in response to the development of a Neo-Tethyan slab window. Gondwana Research 62, 269-286.
Zhang, L., Zhang, R., Wu, K., Chen, Y., Li, C., Hu, Y., He, J., Liang, J., Sun, W., 2018b. Late Cretaceous granitic magmatism and mineralization in the Yingwuling W–Sn deposit, South China: Constraints from zircon and cassiterite U–Pb geochronology and whole-rock geochemistry. Ore Geology Reviews 96, 115-129.
Zhao, L., Guo, F., Fan, W., Zhang, Q., Wu, Y., Li, J., Yan, W., 2016. Early Cretaceous potassic volcanic rocks in the Jiangnan Orogenic Belt, East China: Crustal melting in response to subduction of the Pacific–Izanagi ridge? Chemical Geology 437, 30-43.
Zhou, G., Wu, Y., Li, L., Zhang, W., Zheng, J., Wang, H., Yang, S., 2018. Identification of ca. 2.65 Ga TTGs in the Yudongzi complex and its implications for the early evolution of the Yangtze Block. Precambrian Research 314, 240-263.
Zhu, D.-C., Zhao, Z.-D., Niu, Y., Dilek, Y., Wang, Q., Ji, W.-H., Dong, G.-C., Sui, Q.-L., Liu, Y.-S., Yuan, H.-L., 2012. Cambrian bimodal volcanism in the Lhasa Terrane, southern Tibet: record of an early Paleozoic Andean-type magmatic arc in the Australian proto-Tethyan margin. Chemical Geology 328, 290-308.

## Sheet: G47745
Tang, M., et al., 2020, Reconstructing crustal thickness evolution from europium anomalies in detrital zircons: Geology, v. 49, https://doi.org/10.1130/G47745.1
